# Supplementary material for: Experimental and pan-cancer genome analyses reveal widespread contribution of acrylamide exposure to carcinogenesis in humans
Source: HighWire-hosted journal article supplement (doi:10.1101/gr.242453.118), 2019-03-07
Supplement: Supplemental_Tables_S1_S13.xlsx [file Supplemental_Tables_S1_S13.xlsx]

## Sheet: Contents
Table	Sheet	Contents
Supplemental Table S1	S1	Summary of the WES metrics for all MEF samples
Supplemental Table S2	S2	Comprehensive list of SBS identified across all samples by MuTect
Supplemental Table S3	S3	Comprehensive list of indels identified across all samples by Strelka
Supplemental Table S4	S4	Matrices of the experimentally generated mutational signatures of glycidamide, and of benzo[a]pyrene
Supplemental Table S5	S5	PCAWG cancer types and numbers and proportions of tumors positive for GA signature
Supplemental Table S6	S6	PCAWG satistics: P-values for "signature.presence.test" to assign GA_Exp to PCAWG data, and cosine similarity between the reconstruction and spectra
Supplemental Table S7	S7	False positive mSigAct detection of GA signature and FDR estimates using 2000 synthetic tumors - Summary
Supplemental Table S8	S8	False positive mSigAct detection of GA signature and FDR estimates using 2000 synthetic tumors - Raw tumor counts
Supplemental Table S9	S9	False positive mSigAct detection of GA signature and FDR estimates using 2000 synthetic tumors - Per cancer type distribution
Supplemental Table S10	S10	False positive mSigAct detection of GA signature and FDR estimates using 2000 synthetic tumors - Full listing
Supplemental Table S11	S11_Lung.AdenoCA	Mutational signature assignments for lung adenocarcinoma
	S11_Lung.SCC	Mutational signature assignments for lung squamous cell carcinoma
	S11_Liver.HCC	Mutational signature assignments for liver hepatocellular carcinoma
	S11_Biliary.AdenoCA	Mutational signature assignments for billiary adenocarcinoma
	S11_Panc.AdenoCA	Mutational signature assignments for pancreatic adenocarcinoma
	S11_Kidney.ChRCC	Mutational signature assignments for chromophobe renal cell carcinoma
	S11_Kidney.ccRCC	Mutational signature assignments for clear cell renal cell carcinoma
	S11_Kidney.papillary.RCC	Mutational signature assignments for papillary renal cell carcinoma
	S11_Eso.AdenoCA	Mutational signature assignments for esophageal adenocarcinoma
	S11_Stomach.AdenoCA	Mutational signature assignments for gastric adenocarcinoma
	S11_ColoRect.AdenoCA	Mutational signature assignments for colorectal adenocarcinoma
	S11_Ovary.AdenoCA	Mutational signature assignments for ovarian adenocarcinoma
	S11_Cervix.AdenoCA	Mutational signature assignments for cervical adenocarcinoma
	S11_Cervix.SCC	Mutational signature assignments for cervical squamous cell carcinoma
	S11_Uterus.AdenoCA	Mutational signature assignments for endometrial adenocarcinoma
	S11_Breast.AdenoCA	Mutational signature assignments for adenocarcinoma of the breast
	S11_Breast.LobularCA	Mutational signature assignments for lobular carcinoma of the breast
	S11_Head.SCC	Mutational signature assignments for head and neck squamous cell carcinoma
	S11_Bladder.TCC	Mutational signature assignments for bladder urothelial carcinoma
Supplemental Table S12	S12	NCBI SRA BioProject and BioSample accession and annotation information for Sanger sequencing data
Supplemental Table S13	S13	NCBA SRA BioProject and BioSample accession and annotation information for whole-exome sequencing data

## Sheet: S1
Sample name	Treatment	Mapped reads	Coverage mean	GC percentage	Mapping quality mean	Insert size median	SBS count (MuTect)	Indel count (Strelka)
E210	NA	98,682,090 / 99.89%	175.73	41.32	58.99	202.4	NA	NA
E213	NA	123,390,700 / 99.57%	140.806	41.39	49.4665	291	NA	NA
E214	NA	159,462,656 / 99.77%	186.51	41.35	49.4407	272	NA	NA
Spont_1	NA	112,512,678 / 99.51%	125.25	41.58	49.4194	312	151	39
Spont_2	NA	115,180,824 / 99.79%	133.833	40.56	49.3873	243	141	34
Spont_3	NA	125,907,791 / 99.62%	140.408	41.63	49.4151	324	277	43
ACR_S9_1	Acrylamide+S9	140,440,863 / 99.58%	155.732	41.46	49.4129	314	366	32
ACR_S9_2	Acrylamide+S9	95,517,540 / 99.82%	110.797	40.85	49.4084	262	173	46
ACR_1	Acrylamide	107,153,322 / 99.48%	119.434	41.52	49.4283	313	166	30
ACR_2	Acrylamide	137,819,079 / 99.75%	155.783	41.56	49.4189	289	183	31
ACR_3	Acrylamide	95,094,506 / 99.59%	106.254	41.6	49.4376	321	262	41
ACR_4	Acrylamide	84,448,099 / 99.7%	94.6905	41.51	49.5375	313	151	59
ACR_5	Acrylamide	143,280,784 / 99.79%	161.779	41.21	49.4102	274	154	66
GA_1	Glycidamide	92,525,287 / 99.92%	167.688	41.53	59	204	448	27
GA_2	Glycidamide	102,848,340 / 99.94%	186.219	41.22	58,98	205	573	21
GA_3	Glycidamide	108,770,290 / 99.93%	196.574	41.08	58.95	189	370	29
GA_4	Glycidamide	92,824,785 / 99.93%	168.539	41.4	59	206	592	26
GA_5	Glycidamide	87,983,823 / 99.91%	159.614	41.35	59	189	444	23

## Sheet: S2
Samples	Chr	Start	End	Ref	Alt	Func.refGene	Gene.refGene	GeneDetail.refGene	ExonicFunc.refGene	AAChange.refGene	Func.knownGene	Gene.knownGene	GeneDetail.knownGene	ExonicFunc.knownGene	AAChange.knownGene	Func.ensGene	Gene.ensGene	GeneDetail.ensGene	ExonicFunc.ensGene	AAChange.ensGene	cytoBand	genomicSuperDups	snp142	Strand	context	contig	position	context.1	ref_allele	alt_allele	tumor_name	normal_name	score	dbsnp_site	covered	power	tumor_power	normal_power	normal_power_nsp	normal_power_wsp	total_reads	map_Q0_reads	init_t_lod	t_lod_fstar	t_lod_fstar_forward	t_lod_fstar_reverse	tumor_f	contaminant_fraction	contaminant_lod
ACR_S9_1	chr1	34851857	34851857	G	T	intronic	Plekhb2	NA	NA	NA	intronic	Plekhb2	NA	NA	NA	UTR5	ENSMUSG00000026123	ENSMUST00000152654:c.-10024G>T	NA	NA	1qB	NA	NA	+	CTGGAGTATTGACCAAACATG	chr1	34851857	ATTxACC	G	T	66_S3_L001_R1_001	64_Jiri_S1_L001_R1_001	0	NOVEL	COVERED	0.835716	0.835716	1	1	0.999974	75	0	30.5354	31.0161	18.283	19.1939	0.378378	0.02	-0.32387
ACR_S9_1	chr1	54735033	54735033	A	C	exonic	Ankrd44	NA	nonsynonymous SNV	Ankrd44:NM_001081433:exon12:c.T1210G:p.F404V	exonic	Ankrd44	NA	nonsynonymous SNV	Ankrd44:uc011wkz.1:exon12:c.T1210G:p.F404V	exonic	ENSMUSG00000052331	NA	nonsynonymous SNV	ENSMUSG00000052331:ENSMUST00000178226:exon6:c.T655G:p.F219V,ENSMUSG00000052331:ENSMUST00000044359:exon12:c.T1264G:p.F422V,ENSMUSG00000052331:ENSMUST00000179030:exon12:c.T1210G:p.F404V	1qC1.2	NA	NA	-	GTTCTTCCAAACGTATCTGGG	chr1	54735033	CAAxCGT	A	C	66_S3_L001_R1_001	64_Jiri_S1_L001_R1_001	0	NOVEL	UNCOVERED	0.162447	0.162467	0.999879	0.999879	0.986224	35	0	11.6716	11.8233	9.32175	7.14589	0.384615	0.02	-0.113967
ACR_S9_1	chr1	58504875	58504875	G	C	UTR5	Orc2	NM_008765:c.-3459C>G,NM_001271526:c.-3459C>G	NA	NA	UTR5	Orc2	uc007bcd.2:c.-3459C>G,uc007bce.2:c.-3459C>G	NA	NA	UTR5	ENSMUSG00000026037	ENSMUST00000027198:c.-3459C>G	NA	NA	1qC1.3	NA	NA	-	GCCCGGGGAGGCCAGCGTCTA	chr1	58504875	GAGxCCA	G	C	66_S3_L001_R1_001	64_Jiri_S1_L001_R1_001	0	NOVEL	COVERED	1	1	1	1	1	310	0	-14.105	12.806	12.984	0	0.065217	0.02	1.54991
ACR_S9_1	chr1	62795745	62795745	A	C	exonic	Nrp2	NA	nonsynonymous SNV	Nrp2:NM_001077406:exon16:c.A2477C:p.D826A,Nrp2:NM_001077407:exon16:c.A2462C:p.D821A	exonic	Nrp2	NA	nonsynonymous SNV	Nrp2:uc007bfp.1:exon6:c.A608C:p.D203A,Nrp2:uc007bfj.1:exon16:c.A2477C:p.D826A,Nrp2:uc007bfk.1:exon16:c.A2462C:p.D821A	exonic	ENSMUSG00000025969	NA	nonsynonymous SNV	ENSMUSG00000025969:ENSMUST00000027112:exon16:c.A2477C:p.D826A,ENSMUSG00000025969:ENSMUST00000114155:exon16:c.A2462C:p.D821A	1qC2	NA	NA	+	CCCACAGTGGACACGGTGCCC	chr1	62795745	TGGxCAC	A	C	66_S3_L001_R1_001	64_Jiri_S1_L001_R1_001	0	NOVEL	COVERED	0.987943	0.987943	1	1	1	111	0	25.5277	27.5288	24.6953	5.62422	0.309091	0.02	1.07717
ACR_S9_1	chr1	86605854	86605854	T	G	UTR3	Cops7b	NM_172974:c.*638T>G	NA	NA	UTR3	Cops7b	uc007bvr.1:c.*638T>G,uc007bvs.1:c.*638T>G	NA	NA	UTR3	ENSMUSG00000026240	ENSMUST00000121534:c.*638T>G,ENSMUST00000027446:c.*638T>G,ENSMUST00000138280:c.*1168T>G,ENSMUST00000122884:c.*1032T>G	NA	NA	1qC5	NA	NA	+	CTGACACCAGTGGAGGGTGCT	chr1	86605854	CAGxGGA	T	G	66_S3_L001_R1_001	64_Jiri_S1_L001_R1_001	0	NOVEL	COVERED	0.781059	0.78106	0.999999	0.999999	0.999855	70	0	3.08413	7.47853	6.3406	1.52951	0.125	0.02	-0.298024
ACR_S9_1	chr1	88166547	88166547	T	G	exonic	Ugt1a5	NA	nonsynonymous SNV	Ugt1a5:NM_201643:exon1:c.T496G:p.F166V	exonic	Ugt1a5	NA	nonsynonymous SNV	Ugt1a5:uc007byh.1:exon1:c.T496G:p.F166V	exonic	ENSMUSG00000089943	NA	nonsynonymous SNV	ENSMUSG00000089943:ENSMUST00000097659:exon1:c.T496G:p.F166V	1qD	NA	NA	+	TCCTGCTGTGTTCTTTCTACG	chr1	88166547	GTGxTCT	T	G	66_S3_L001_R1_001	64_Jiri_S1_L001_R1_001	0	NOVEL	COVERED	0.99993	0.99993	1	1	1	203	0	71.889	73.3052	36.9896	53.0205	0.375	0.02	0.759853
ACR_S9_1	chr1	135745355	135745355	G	C	exonic	Csrp1	NA	nonsynonymous SNV	Csrp1:NM_007791:exon3:c.G209C:p.G70A	exonic	Csrp1	NA	nonsynonymous SNV	Csrp1:uc007cto.1:exon3:c.G209C:p.G70A	exonic	ENSMUSG00000026421	NA	nonsynonymous SNV	ENSMUSG00000026421:ENSMUST00000027677:exon3:c.G209C:p.G70A,ENSMUSG00000026421:ENSMUST00000097561:exon3:c.G209C:p.G70A	1qE4	NA	NA	+	GGGCCAAAAGGCTACGGCTAC	chr1	135745355	AAGxCTA	G	C	66_S3_L001_R1_001	64_Jiri_S1_L001_R1_001	0	NOVEL	COVERED	0.322784	0.322807	0.999931	0.999931	0.991692	43	0	6.99452	8.27042	8.43274	6.40189	0.222222	0.02	-0.157751
ACR_S9_1	chr1	143748508	143748508	T	G	UTR3	Glrx2	NM_001038593:c.*1869T>G,NM_001038592:c.*1869T>G,NM_023505:c.*1869T>G,NM_001038594:c.*1869T>G	NA	NA	UTR3	Glrx2	uc007cwz.1:c.*1869T>G,uc007cxa.1:c.*1869T>G,uc011wtj.1:c.*1869T>G,uc007cxb.1:c.*1869T>G,uc007cxc.1:c.*1869T>G	NA	NA	UTR3	ENSMUSG00000018196	ENSMUST00000129653:c.*1869T>G	NA	NA	1qF	NA	NA	+	CTTATAAAACTTTTTCTTTTT	chr1	143748508	AACxTTT	T	G	66_S3_L001_R1_001	64_Jiri_S1_L001_R1_001	0	NOVEL	COVERED	0.99993	0.99993	1	1	1	178	0	15.3833	20.3224	10.0447	13.2679	0.209677	0.02	0.487344
ACR_S9_1	chr1	154485757	154485757	A	G	exonic	Cacna1e	NA	nonsynonymous SNV	Cacna1e:NM_009782:exon12:c.T1547C:p.F516S	exonic	Cacna1e	NA	nonsynonymous SNV	Cacna1e:uc007dav.1:exon12:c.T1547C:p.F516S	exonic	ENSMUSG00000004110	NA	nonsynonymous SNV	ENSMUSG00000004110:ENSMUST00000004214:exon12:c.T623C:p.F208S	1qG3	NA	NA	-	GAGTCCCAGAAACAAAAACTC	chr1	154485757	AGAxACA	A	G	66_S3_L001_R1_001	64_Jiri_S1_L001_R1_001	0	NOVEL	COVERED	0.954491	0.954491	1	1	1	105	0	14.0542	18.6521	5.92932	14.1515	0.183673	0.02	-0.429554
ACR_S9_1	chr1	156302480	156302480	C	G	exonic	Tdrd5	NA	nonsynonymous SNV	Tdrd5:NM_001134741:exon2:c.G119C:p.G40A,Tdrd5:NM_001277730:exon2:c.G119C:p.G40A	exonic	Tdrd5	NA	nonsynonymous SNV	Tdrd5:uc029qui.1:exon2:c.G119C:p.G40A,Tdrd5:uc029quj.1:exon2:c.G119C:p.G40A	exonic	ENSMUSG00000060985	NA	nonsynonymous SNV	ENSMUSG00000060985:ENSMUST00000121146:exon2:c.G119C:p.G40A,ENSMUSG00000060985:ENSMUST00000141760:exon2:c.G119C:p.G40A,ENSMUSG00000060985:ENSMUST00000167528:exon2:c.G119C:p.G40A	1qG3	NA	NA	-	GAGATGGTTGCCAACCATCAA	chr1	156302480	TTGxCAA	C	G	66_S3_L001_R1_001	64_Jiri_S1_L001_R1_001	0	NOVEL	COVERED	0.999984	0.999984	1	1	1	206	0	-13.1	8.50696	4.1916	4.07775	0.057143	0.02	1.88647
ACR_S9_1	chr1	157286864	157286864	A	G	intronic	Rasal2	NA	NA	NA	intronic	Rasal2	NA	NA	NA	intronic	ENSMUSG00000070565	NA	NA	NA	1qH1	NA	NA	-	TCTGGCCAAGAGACACAGAGA	chr1	157286864	AAGxGAC	A	G	66_S3_L001_R1_001	64_Jiri_S1_L001_R1_001	0	NOVEL	COVERED	0.835714	0.835716	0.999998	0.999998	0.999763	71	0	1.48453	6.864	0	7.13816	0.111111	0.02	-0.324261
ACR_S9_1	chr1	159912622	159912622	A	T	intronic	Tnr	NA	NA	NA	intronic	Tnr	NA	NA	NA	intronic	ENSMUSG00000015829	NA	NA	NA	1qH1	NA	NA	+	AAAACTTTCTATTGCTTTTCT	chr1	159912622	TCTxTTG	A	T	66_S3_L001_R1_001	64_Jiri_S1_L001_R1_001	0	NOVEL	COVERED	0.522125	0.522161	0.999931	0.999931	0.991692	49	0	5.10403	7.61989	7.86908	1.93158	0.166667	0.02	-0.210064
ACR_S9_1	chr1	167848622	167848622	G	C	UTR3	Lmx1a	NM_033652:c.*1861G>C	NA	NA	UTR3	Lmx1a	uc007dlc.1:c.*1861G>C	NA	NA	UTR3	ENSMUSG00000026686	ENSMUST00000111377:c.*1861G>C,ENSMUST00000028003:c.*1861G>C	NA	NA	1qH2.3	NA	NA	+	GGCACAGACAGTGTCTGTGTG	chr1	167848622	ACAxTGT	G	C	66_S3_L001_R1_001	E210_S1	0	NOVEL	COVERED	0.999487	0.999487	1	1	1	153	0	-6.49501	8.60287	3.92275	4.38429	0.074074	0.02	0.67581
ACR_S9_1	chr1	173728895	173728895	C	T	exonic	AI607873	NA	nonsynonymous SNV	AI607873:NM_001204910:exon5:c.G2297A:p.S766N	exonic	AI607873	NA	nonsynonymous SNV	AI607873:uc007dru.3:exon5:c.G2297A:p.S766N,AI607873:uc011www.2:exon5:c.G2276A:p.S759N	exonic	ENSMUSG00000073490	NA	nonsynonymous SNV	ENSMUSG00000073490:ENSMUST00000042610:exon5:c.G2297A:p.S766N,ENSMUSG00000073490:ENSMUST00000127730:exon5:c.G2276A:p.S759N	1qH3	NA	NA	-	GGATGGACTGCTGTGTACTGT	chr1	173728895	CTGxTGT	C	T	66_S3_L001_R1_001	64_Jiri_S1_L001_R1_001	0	NOVEL	COVERED	0.899314	0.899314	1	1	0.999994	85	0	3.68974	7.36239	5.09833	2.00389	0.137931	0.02	-0.368055
ACR_S9_1	chr1	190888617	190888617	G	C	intronic	Rps6kc1	NA	NA	NA	intronic	Rps6kc1	NA	NA	NA	intronic	ENSMUSG00000089872	NA	NA	NA	1qH6	NA	NA	-	GGAACTGCATGGAACAAGCGT	chr1	190888617	CATxGAA	G	C	66_S3_L001_R1_001	64_Jiri_S1_L001_R1_001	0	NOVEL	COVERED	0.490476	0.490544	0.99986	0.99986	0.982485	42	0	10.738	11.6067	6.27368	5.22883	0.285714	0.02	-0.201517
ACR_S9_1	chr2	10105803	10105803	T	G	exonic	Itih2	NA	nonsynonymous SNV	Itih2:NM_010582:exon13:c.A1476C:p.K492N	exonic	Itih2	NA	nonsynonymous SNV	Itih2:uc008ihq.2:exon13:c.A1476C:p.K492N	exonic	ENSMUSG00000037254	NA	nonsynonymous SNV	ENSMUSG00000037254:ENSMUST00000042290:exon13:c.A1476C:p.K492N	2qA1	NA	NA	-	GGTTGTAAAATTTCTAGAAGT	chr2	10105803	AAAxTTC	T	G	66_S3_L001_R1_001	64_Jiri_S1_L001_R1_001	0	NOVEL	COVERED	1	1	1	1	1	372	0	22.4395	43.3787	21.6249	33.2982	0.148571	0.02	3.10622
ACR_S9_1	chr2	14987828	14987828	A	G	UTR3	Cacnb2	NM_023116:c.*1752A>G,NM_001252533:c.*1752A>G	NA	NA	UTR3	Cacnb2	uc008ikm.2:c.*1752A>G,uc012brb.2:c.*1752A>G,uc008iks.2:c.*1752A>G	NA	NA	UTR3	ENSMUSG00000057914	ENSMUST00000114723:c.*1752A>G	NA	NA	2qA2	NA	NA	+	TTCACAGGCAAACGTCTGCCT	chr2	14987828	GCAxACG	A	G	66_S3_L001_R1_001	E210_S1	0	NOVEL	COVERED	1	1	1	1	1	235	0	-6.18141	16.5343	4.03565	14.4302	0.079365	0.02	1.86132
ACR_S9_1	chr2	19446387	19446387	T	G	exonic	Ptf1a	NA	nonsynonymous SNV	Ptf1a:NM_018809:exon1:c.T527G:p.I176S	exonic	Ptf1a	NA	nonsynonymous SNV	Ptf1a:uc012brh.1:exon1:c.T527G:p.I176S	exonic	ENSMUSG00000026735	NA	nonsynonymous SNV	ENSMUSG00000026735:ENSMUST00000028068:exon1:c.T527G:p.I176S	2qA3	NA	NA	+	ATGCAGTCCATCAACGACGCC	chr2	19446387	CCAxCAA	T	G	66_S3_L001_R1_001	64_Jiri_S1_L001_R1_001	0	NOVEL	COVERED	0.457707	0.457757	0.999892	0.999892	0.987855	45	0	6.00778	7.87533	8.17206	0	0.190476	0.02	-0.192496
ACR_S9_1	chr2	22574299	22574299	G	C	intergenic	Myo3a,Gad2	dist=150929;dist=48028	NA	NA	upstream	Myo3a	NA	NA	NA	exonic	ENSMUSG00000025716	NA	nonsynonymous SNV	ENSMUSG00000025716:ENSMUST00000138863:exon4:c.G551C:p.S184T,ENSMUSG00000025716:ENSMUST00000044749:exon28:c.G3365C:p.S1122T	2qA3	NA	NA	NA	GCAGGAAGGAGCATTCGGGCT	chr2	22574299	GGAxCAT	G	C	66_S3_L001_R1_001	64_Jiri_S1_L001_R1_001	0	NOVEL	COVERED	1	1	1	1	1	400	0	11.1109	43.2375	32.4384	21.0683	0.117117	0.02	4.42696
ACR_S9_1	chr2	26842564	26842564	T	C	UTR3	Abo	NM_001290444:c.*623A>G,NM_030718:c.*623A>G	NA	NA	UTR3	Abo	uc008iwb.1:c.*623A>G	NA	NA	UTR3	ENSMUSG00000015787	ENSMUST00000114045:c.*623A>G,ENSMUST00000102900:c.*623A>G	NA	NA	2qA3	NA	NA	-	ACTGTATCAATAAAAATATAG	chr2	26842564	CAAxAAA	T	C	66_S3_L001_R1_001	64_Jiri_S1_L001_R1_001	0	NOVEL	COVERED	0.954491	0.954491	1	1	1	110	0	6.75765	12.1547	9.12641	4.99866	0.163265	0.02	-0.426873
ACR_S9_1	chr2	31292745	31292745	G	C	UTR3	Ncs1	NM_019681:c.*480G>C	NA	NA	UTR3	Ncs1	uc008jdq.1:c.*480G>C	NA	NA	UTR3	ENSMUSG00000062661	ENSMUST00000000199:c.*480G>C	NA	NA	2qB	NA	NA	+	GAGGCTGCTGGCAGCAAGGGT	chr2	31292745	CTGxCAG	G	C	66_S3_L001_R1_001	64_Jiri_S1_L001_R1_001	0	NOVEL	COVERED	0.999998	0.999998	1	1	1	197	0	-9.76724	11.6258	10.8544	2.38328	0.070796	0.02	1.97816
ACR_S9_1	chr2	31817244	31817244	C	G	exonic	Fibcd1	NA	nonsynonymous SNV	Fibcd1:NM_178887:exon6:c.G1000C:p.E334Q	exonic	Fibcd1	NA	nonsynonymous SNV	Fibcd1:uc008jee.2:exon6:c.G1000C:p.E334Q	exonic	ENSMUSG00000026841	NA	nonsynonymous SNV	ENSMUSG00000026841:ENSMUST00000028188:exon6:c.G1000C:p.E334Q	2qB	NA	NA	-	TCAAAGTCTTCTAGGTCCACG	chr2	31817244	CTTxTAG	C	G	66_S3_L001_R1_001	64_Jiri_S1_L001_R1_001	0	NOVEL	COVERED	0.800244	0.800245	0.999999	0.999999	0.999806	70	0	1.92266	7.02014	7.80579	1.33178	0.114286	0.02	-0.305957
ACR_S9_1	chr2	32575786	32575786	C	G	upstream	Pip5kl1	NA	NA	NA	upstream	Pip5kl1	NA	NA	NA	UTR5	ENSMUSG00000046854	ENSMUST00000055304:c.-79C>G	NA	NA	2qB	NA	NA	+	TGGTCGTTCGCCATGCAGAGG	chr2	32575786	TCGxCAT	C	G	66_S3_L001_R1_001	64_Jiri_S1_L001_R1_001	0	NOVEL	COVERED	0.959859	0.959859	1	1	0.999995	95	0	12.0677	16.3842	10.5103	5.46419	0.2	0.02	-0.435488
ACR_S9_1	chr2	34891458	34891458	A	T	UTR3	Cutal	NM_030021:c.*1076A>T	NA	NA	UTR3	Cutal	uc008jjf.1:c.*1076A>T,uc008jjg.1:c.*1161A>T	NA	NA	UTR3	ENSMUSG00000026870	ENSMUST00000113068:c.*1076A>T,ENSMUST00000028228:c.*1161A>T	NA	NA	2qB	NA	NA	+	TCCAGTGGGCAGCCCACGGGT	chr2	34891458	GGCxGCC	A	T	66_S3_L001_R1_001	70_S7_L001_R1_001	0	NOVEL	COVERED	0.990964	0.990964	1	1	0.999997	108	0	-2.00074	7.91195	0.020603	8.3637	0.098361	0.02	0.860023
ACR_S9_1	chr2	43636324	43636324	C	T	UTR3	Kynu	NM_001289594:c.*1303C>T	NA	NA	UTR3	Kynu	uc033hmv.1:c.*1303C>T	NA	NA	UTR3	ENSMUSG00000026866	ENSMUST00000050511:c.*1303C>T	NA	NA	2qB	NA	NA	+	TGTCAAAATACGACATTCAAC	chr2	43636324	ATAxGAC	C	T	66_S3_L001_R1_001	64_Jiri_S1_L001_R1_001	0	NOVEL	COVERED	1	1	1	1	1	515	0	34.8633	72.6365	65.8156	10.8682	0.135593	0.02	4.91858
ACR_S9_1	chr2	52287268	52287268	T	G	exonic	Neb	NA	nonsynonymous SNV	Neb:NM_010889:exon37:c.A4060C:p.M1354L	exonic	Neb	NA	nonsynonymous SNV	Neb:uc008jqv.1:exon37:c.A4060C:p.M1354L	exonic	ENSMUSG00000026950	NA	nonsynonymous SNV	ENSMUSG00000026950:ENSMUST00000075301:exon36:c.A4060C:p.M1354L,ENSMUSG00000026950:ENSMUST00000036934:exon37:c.A4060C:p.M1354L	2qC1.1	NA	NA	-	GCCACATTCATATAATGGACC	chr2	52287268	TCAxATA	T	G	66_S3_L001_R1_001	64_Jiri_S1_L001_R1_001	0	NOVEL	COVERED	0.877705	0.877708	0.999997	0.999997	0.999646	70	0	7.05861	11.7315	5.79615	5.55533	0.15	0.02	-0.350081
ACR_S9_1	chr2	60418278	60418278	T	G	UTR3	Pla2r1	NM_008867:c.*1735A>C	NA	NA	UTR3	Pla2r1	uc008jug.2:c.*1735A>C	NA	NA	UTR3	ENSMUSG00000054580	ENSMUST00000112525:c.*1735A>C,ENSMUST00000067708:c.*1735A>C	NA	NA	2qC1.1	NA	NA	-	ACATTCATACTTTTTCTCAGA	chr2	60418278	TACxTTT	T	G	66_S3_L001_R1_001	64_Jiri_S1_L001_R1_001	0	NOVEL	COVERED	1	1	1	1	1	237	0	25.9741	40.4752	17.9881	22.3112	0.176871	0.02	2.79141
ACR_S9_1	chr2	62703054	62703054	A	C	exonic	Kcnh7	NA	synonymous SNV	Kcnh7:NM_133207:exon16:c.T3480G:p.T1160T	exonic	Kcnh7	NA	synonymous SNV	Kcnh7:uc008jvq.1:exon16:c.T3480G:p.T1160T	exonic	ENSMUSG00000059742	NA	synonymous SNV	ENSMUSG00000059742:ENSMUST00000075052:exon16:c.T3480G:p.T1160T	2qC1.3	NA	NA	-	GATGAAGGTAAGTTTTCCTTT	chr2	62703054	GTAxGTT	A	C	66_S3_L001_R1_001	64_Jiri_S1_L001_R1_001	0	NOVEL	COVERED	0.9982	0.9982	1	1	1	132	0	-0.236701	10.5567	4.89975	6.92841	0.111111	0.02	0.755216
ACR_S9_1	chr2	66027011	66027011	A	T	UTR3	Csrnp3	NM_178634:c.*3988A>T,NM_153409:c.*3988A>T,NM_001290666:c.*3988A>T,NM_001290665:c.*3988A>T	NA	NA	UTR3	Csrnp3	uc008jwq.2:c.*3988A>T,uc008jwr.2:c.*3988A>T,uc012bwf.1:c.*3988A>T,uc008jws.2:c.*3988A>T,uc008jwt.2:c.*3988A>T	NA	NA	UTR3	ENSMUSG00000044647	ENSMUST00000122912:c.*3988A>T	NA	NA	2qC1.3	NA	NA	+	GCAGAGAGGGACATGACCCTC	chr2	66027011	GGGxCAT	A	T	66_S3_L001_R1_001	64_Jiri_S1_L001_R1_001	0	NOVEL	COVERED	0.997553	0.997553	1	1	1	135	0	-5.66206	7.58323	0	8.52909	0.071429	0.02	0.77225
ACR_S9_1	chr2	66084229	66084229	A	G	exonic	Galnt3	NA	synonymous SNV	Galnt3:NM_015736:exon11:c.T1843C:p.L615L	exonic	Galnt3	NA	synonymous SNV	Galnt3:uc008jwu.2:exon11:c.T1843C:p.L615L	exonic	ENSMUSG00000026994	NA	synonymous SNV	ENSMUSG00000026994:ENSMUST00000028378:exon11:c.T1843C:p.L615L	2qC1.3	NA	NA	-	CATGGCACTAAGTTTGGATGC	chr2	66084229	CTAxGTT	A	G	66_S3_L001_R1_001	64_Jiri_S1_L001_R1_001	0	NOVEL	COVERED	0.999998	0.999998	1	1	1	211	0	-14.2542	9.48363	2.85447	8.34681	0.059829	0.02	2.05406
ACR_S9_1	chr2	66197729	66197729	G	A	exonic	Ttc21b	NA	nonsynonymous SNV	Ttc21b:NM_001047604:exon25:c.C3395T:p.T1132I,Ttc21b:NM_001290669:exon25:c.C3395T:p.T1132I	exonic	Ttc21b	NA	nonsynonymous SNV	Ttc21b:uc008jwv.1:exon25:c.C3395T:p.T1132I,Ttc21b:uc012bwg.1:exon25:c.C3395T:p.T1132I	exonic	ENSMUSG00000034848	NA	nonsynonymous SNV	ENSMUSG00000034848:ENSMUST00000102718:exon25:c.C3395T:p.T1132I,ENSMUSG00000034848:ENSMUST00000125446:exon25:c.C3395T:p.T1132I	2qC1.3	NA	NA	-	CTTCTGCTTGGTGGCCATCAA	chr2	66197729	TTGxTGG	G	A	66_S3_L001_R1_001	64_Jiri_S1_L001_R1_001	0	NOVEL	COVERED	0.999804	0.999804	1	1	1	140	0	-11.3971	6.95737	4.09604	4.24362	0.05618	0.02	0.624871
ACR_S9_1	chr2	66197736	66197736	T	C	exonic	Ttc21b	NA	nonsynonymous SNV	Ttc21b:NM_001047604:exon25:c.A3388G:p.M1130V,Ttc21b:NM_001290669:exon25:c.A3388G:p.M1130V	exonic	Ttc21b	NA	nonsynonymous SNV	Ttc21b:uc008jwv.1:exon25:c.A3388G:p.M1130V,Ttc21b:uc012bwg.1:exon25:c.A3388G:p.M1130V	exonic	ENSMUSG00000034848	NA	nonsynonymous SNV	ENSMUSG00000034848:ENSMUST00000102718:exon25:c.A3388G:p.M1130V,ENSMUSG00000034848:ENSMUST00000125446:exon25:c.A3388G:p.M1130V	2qC1.3	NA	NA	-	TTGGTGGCCATCAAGCAGCAG	chr2	66197736	CCAxCAA	T	C	66_S3_L001_R1_001	64_Jiri_S1_L001_R1_001	0	NOVEL	COVERED	0.999559	0.999559	1	1	1	135	0	-9.92635	7.08335	4.00651	4.41883	0.059524	0.02	0.764648
ACR_S9_1	chr2	69509358	69509358	C	G	exonic	Lrp2	NA	nonsynonymous SNV	Lrp2:NM_001081088:exon22:c.G3208C:p.A1070P	exonic	Lrp2	NA	nonsynonymous SNV	Lrp2:uc008jyc.1:exon22:c.G3208C:p.A1070P,Lrp2:uc008jyd.1:exon22:c.G3208C:p.A1070P,Lrp2:uc008jye.1:exon22:c.G3208C:p.A1070P	exonic	ENSMUSG00000027070	NA	nonsynonymous SNV	ENSMUSG00000027070:ENSMUST00000080953:exon22:c.G3208C:p.A1070P,ENSMUSG00000027070:ENSMUST00000100051:exon22:c.G3208C:p.A1070P	2qC2	NA	NA	-	CAAGTAAAAGCCGAAGATGAG	chr2	69509358	AAGxCGA	C	G	66_S3_L001_R1_001	64_Jiri_S1_L001_R1_001	0	NOVEL	COVERED	0.959859	0.959859	1	1	1	103	0	7.52373	13.1805	5.9935	6.80875	0.16	0.02	-0.435898
ACR_S9_1	chr2	84736683	84736683	G	C	UTR5	Ypel4	NM_001005342:c.-142G>C	NA	NA	UTR5	Ypel4	uc008kjc.1:c.-142G>C	NA	NA	UTR5	ENSMUSG00000034059	ENSMUST00000090729:c.-142G>C,ENSMUST00000111643:c.-142G>C	NA	NA	2qD	NA	NA	+	GGGGGCCCTGGCAGGGCAGCC	chr2	84736683	CTGxCAG	G	C	66_S3_L001_R1_001	64_Jiri_S1_L001_R1_001	0	NOVEL	COVERED	0.760886	0.760887	0.999999	0.999999	0.999806	68	0	3.22999	7.10667	7.37465	0	0.133333	0.02	-0.286845
ACR_S9_1	chr2	91135272	91135272	C	G	intronic	Mybpc3	NA	NA	NA	intronic	Mybpc3	NA	NA	NA	intronic	ENSMUSG00000002100	NA	NA	NA	2qE1	NA	NA	+	CTCCCTCACACTGTGAGGAAT	chr2	91135272	ACAxTGT	C	G	66_S3_L001_R1_001	64_Jiri_S1_L001_R1_001	0	NOVEL	COVERED	0.97082	0.97082	1	1	0.999992	93	0	1.11896	9.01236	8.0363	2.93588	0.113208	0.02	1.03627
ACR_S9_1	chr2	91278145	91278145	T	A	UTR3	1110051M20Rik	NM_175123:c.*638A>T	NA	NA	UTR3	1110051M20Rik	uc008kvt.1:c.*638A>T,uc008kvu.1:c.*638A>T	NA	NA	UTR3	ENSMUSG00000040591	ENSMUST00000102594:c.*638A>T	NA	NA	2qE1	NA	NA	-	GTGGCCATCCTGGATGGCCCC	chr2	91278145	TCCxGGA	T	A	66_S3_L001_R1_001	E210_S1	0	NOVEL	COVERED	0.999407	0.999407	1	1	1	134	0	-9.14299	7.33312	2.32811	5.11568	0.060976	0.02	0.781798
ACR_S9_1	chr2	92191986	92191986	T	G	ncRNA_exonic	Mir1955	NA	NA	NA	ncRNA_exonic	Mir1955	NA	NA	NA	ncRNA_exonic	ENSMUSG00000088639	NA	NA	NA	2qE1	NA	NA	+	GCTGGTTTACTTACTACAAGT	chr2	92191986	TACxTAC	T	G	66_S3_L001_R1_001	64_Jiri_S1_L001_R1_001	0	NOVEL	COVERED	0.999999	0.999999	1	1	1	218	0	-2.62074	15.7136	13.0458	2.49928	0.108333	0.02	1.54574
ACR_S9_1	chr2	125771449	125771449	T	G	exonic	Secisbp2l	NA	synonymous SNV	Secisbp2l:NM_177608:exon4:c.A624C:p.R208R	exonic	Secisbp2l	NA	synonymous SNV	Secisbp2l:uc008mcz.1:exon4:c.A624C:p.R208R	exonic	ENSMUSG00000035093	NA	synonymous SNV	ENSMUSG00000035093:ENSMUST00000053699:exon4:c.A624C:p.R208R	2qF1	NA	NA	-	CAATTTTTGATCGGCTATCAG	chr2	125771449	TGAxCGG	T	G	66_S3_L001_R1_001	64_Jiri_S1_L001_R1_001	0	NOVEL	COVERED	0.995687	0.995687	1	1	1	146	0	21.9849	27.2879	16.7448	19.4989	0.208955	0.02	1.01042
ACR_S9_1	chr2	126851362	126851362	G	T	exonic	Trpm7	NA	nonsynonymous SNV	Trpm7:NM_001164325:exon4:c.C302A:p.S101Y,Trpm7:NM_021450:exon4:c.C302A:p.S101Y	exonic	Trpm7	NA	nonsynonymous SNV	Trpm7:uc008mef.2:exon4:c.C302A:p.S101Y,Trpm7:uc008meg.2:exon4:c.C302A:p.S101Y,Trpm7:uc008mei.2:exon4:c.C302A:p.S101Y	exonic	ENSMUSG00000027365	NA	nonsynonymous SNV	ENSMUSG00000027365:ENSMUST00000028843:exon4:c.C302A:p.S101Y,ENSMUSG00000027365:ENSMUST00000103224:exon4:c.C302A:p.S101Y	2qF1	NA	NA	-	GTAGGAATGAGAACCCCCTTG	chr2	126851362	TGAxAAC	G	T	66_S3_L001_R1_001	64_Jiri_S1_L001_R1_001	0	NOVEL	COVERED	1	1	1	1	1	211	0	-16.7985	8.85706	6.33611	5.59291	0.056452	0.02	1.88815
ACR_S9_1	chr2	127260226	127260226	T	A	UTR3	Tmem127	NM_175145:c.*2962T>A	NA	NA	UTR3	Tmem127	uc008mfc.1:c.*2962T>A	NA	NA	UTR3	ENSMUSG00000034850	ENSMUST00000035871:c.*2962T>A	NA	NA	2qF1	NA	NA	+	CTGTTCCCTCTGAGGGAATGG	chr2	127260226	CTCxGAG	T	A	66_S3_L001_R1_001	64_Jiri_S1_L001_R1_001	0	NOVEL	COVERED	0.999989	0.999989	1	1	1	175	0	-12.9844	8.87877	4.2325	4.29773	0.056604	0.02	2.0626
ACR_S9_1	chr2	130803756	130803756	A	T	ncRNA_exonic	Gm14057	NA	NA	NA	exonic	Gm14057	NA	nonsynonymous SNV	Gm14057:uc012cej.1:exon1:c.T227A:p.L76H	ncRNA_exonic	ENSMUSG00000089662	NA	NA	NA	2qF1	NA	NA	-	CCGCTTACGAAGCTCCTTATG	chr2	130803756	CGAxGCT	A	T	66_S3_L001_R1_001	64_Jiri_S1_L001_R1_001	0	NOVEL	COVERED	0.909068	0.909069	0.999999	0.999999	0.999855	79	0	35.2962	35.9105	13.8804	24.2934	0.372093	0.02	-0.37669
ACR_S9_1	chr2	131176139	131176139	C	G	ncRNA_intronic	Mir3098	NA	NA	NA	ncRNA_intronic	Mir3098	NA	NA	NA	intronic	ENSMUSG00000027329	NA	NA	NA	2qF1	NA	NA	-	CCTGGATTAGCCAGGGGCATC	chr2	131176139	TAGxCAG	C	G	66_S3_L001_R1_001	64_Jiri_S1_L001_R1_001	0	NOVEL	COVERED	1	1	1	1	1	324	0	-22.5407	16.1835	12.1944	3.99481	0.062176	0.02	2.98861
ACR_S9_1	chr2	147183818	147183818	G	A	UTR3	Nkx2-2	NM_010919:c.*177C>T	NA	NA	UTR3	Nkx2-2	uc008msu.1:c.*177C>T	NA	NA	UTR3	ENSMUSG00000027434	ENSMUST00000067075:c.*177C>T	NA	NA	2qG2	NA	NA	-	CTGCCACTCGGGGAGGCACAG	chr2	147183818	TCGxGGA	G	A	66_S3_L001_R1_001	E210_S1	0	NOVEL	COVERED	1	1	1	1	1	547	0	-81.3016	15.9237	3.81952	16.595	0.031785	0.02	8.36722
ACR_S9_1	chr2	152008677	152008677	C	A	UTR3	Slc52a3	NM_027172:c.*519C>A,NM_001164820:c.*661C>A,NM_001164819:c.*519C>A	NA	NA	UTR3	Slc52a3	uc008neu.2:c.*519C>A,uc008nev.2:c.*519C>A,uc012cga.1:c.*661C>A	NA	NA	UTR3	ENSMUSG00000027463	ENSMUST00000109859:c.*661C>A,ENSMUST00000073228:c.*519C>A,ENSMUST00000109861:c.*519C>A,ENSMUST00000109858:c.*661C>A	NA	NA	2qG3	NA	NA	+	GGACACCCTTCTTAATACAAC	chr2	152008677	CTTxTTA	C	A	66_S3_L001_R1_001	64_Jiri_S1_L001_R1_001	0	NOVEL	COVERED	0.954491	0.954491	1	1	0.999992	90	0	0.862315	8.33446	1.31724	7.29818	0.104167	0.02	-0.429227
ACR_S9_1	chr2	152707242	152707242	C	G	UTR3	H13	NM_001159551:c.*2670C>G,NM_010376:c.*2518C>G	NA	NA	UTR3	H13	uc008ngc.2:c.*2670C>G,uc008ngb.2:c.*2518C>G,uc008ngd.2:c.*2518C>G	NA	NA	UTR3	ENSMUSG00000019188	ENSMUST00000125366:c.*2518C>G	NA	NA	2qH1	NA	NA	+	GAGGTGAGAGCATCCTCTCAC	chr2	152707242	GAGxATC	C	G	66_S3_L001_R1_001	64_Jiri_S1_L001_R1_001	0	NOVEL	COVERED	0.997553	0.997553	1	1	1	135	0	-2.46975	9.95049	4.81938	4.98342	0.084507	0.02	0.869243
ACR_S9_1	chr2	152885134	152885134	A	C	exonic	Tpx2	NA	synonymous SNV	Tpx2:NM_001141975:exon12:c.A1320C:p.R440R,Tpx2:NM_001141976:exon12:c.A1320C:p.R440R,Tpx2:NM_001141977:exon12:c.A1320C:p.R440R,Tpx2:NM_001141978:exon12:c.A1320C:p.R440R,Tpx2:NM_028109:exon12:c.A1320C:p.R440R	exonic	Tpx2	NA	synonymous SNV	Tpx2:uc008ngr.2:exon9:c.A654C:p.R218R,Tpx2:uc008ngo.2:exon12:c.A1320C:p.R440R,Tpx2:uc008ngp.2:exon12:c.A1320C:p.R440R,Tpx2:uc008ngq.2:exon12:c.A1320C:p.R440R,Tpx2:uc012cgj.1:exon12:c.A1320C:p.R440R,Tpx2:uc012cgk.1:exon12:c.A1320C:p.R440R	exonic	ENSMUSG00000027469	NA	synonymous SNV	ENSMUSG00000027469:ENSMUST00000028969:exon12:c.A1320C:p.R440R,ENSMUSG00000027469:ENSMUST00000109816:exon12:c.A1320C:p.R440R,ENSMUSG00000027469:ENSMUST00000164120:exon12:c.A1320C:p.R440R,ENSMUSG00000027469:ENSMUST00000178997:exon12:c.A1320C:p.R440R	2qH1	NA	NA	+	TTGAGAAACGAATTCATGAGC	chr2	152885134	ACGxATT	A	C	66_S3_L001_R1_001	64_Jiri_S1_L001_R1_001	0	NOVEL	COVERED	1	1	1	1	1	834	0	133.666	172.48	48.7355	138.035	0.196903	0.02	10.2527
ACR_S9_1	chr2	152942782	152942782	C	A	UTR3	Dusp15	NM_001159376:c.*399G>T	NA	NA	UTR3	Dusp15	uc012cgl.1:c.*399G>T	NA	NA	UTR3	ENSMUSG00000042662	ENSMUST00000123121:c.*399G>T	NA	NA	2qH1	NA	NA	-	TGGCGCTTCCCGGGGGCCCCT	chr2	152942782	TCCxGGG	C	A	66_S3_L001_R1_001	70_S7_L001_R1_001	0	NOVEL	COVERED	0.899313	0.899314	0.999999	0.999999	0.999855	78	0	0.046714	6.88894	1.68733	7.27346	0.095238	0.02	-0.366746
ACR_S9_1	chr2	156073568	156073568	C	G	exonic	Cpne1	NA	nonsynonymous SNV	Cpne1:NM_170590:exon16:c.G1564C:p.A522P,Cpne1:NM_170588:exon17:c.G1564C:p.A522P	exonic	Cpne1	NA	nonsynonymous SNV	Cpne1:uc012chp.1:exon15:c.G1144C:p.A382P,Cpne1:uc008nmg.2:exon16:c.G1564C:p.A522P,Cpne1:uc008nmf.2:exon17:c.G1564C:p.A522P	exonic	ENSMUSG00000074643	NA	nonsynonymous SNV	ENSMUSG00000074643:ENSMUST00000079312:exon16:c.G1396C:p.A466P,ENSMUSG00000074643:ENSMUST00000109607:exon16:c.G1564C:p.A522P,ENSMUSG00000074643:ENSMUST00000109608:exon17:c.G1564C:p.A522P	2qH1	NA	NA	-	GTTGGAGGTGCCTTTAACGGG	chr2	156073568	GTGxCTT	C	G	66_S3_L001_R1_001	64_Jiri_S1_L001_R1_001	0	NOVEL	COVERED	0.948278	0.948402	0.999869	0.999869	0.984784	69	0	6.09384	11.6745	9.50273	4.18796	0.148936	0.02	-0.420568
ACR_S9_1	chr2	158409980	158409980	C	G	UTR5	Ralgapb	NM_001291138:c.-10864C>G,NM_001291137:c.-10864C>G	NA	NA	UTR5	Ralgapb	uc008nqf.1:c.-10864C>G,uc008nqg.1:c.-10864C>G,uc008nqh.1:c.-10864C>G,uc012cif.1:c.-10864C>G,uc012cig.1:c.-10864C>G	NA	NA	UTR5	ENSMUSG00000027652	ENSMUST00000109486:c.-10864C>G,ENSMUST00000046274:c.-10864C>G,ENSMUST00000109485:c.-10864C>G	NA	NA	2qH1	NA	NA	+	GGACTGACTGCCGGTGGAGGG	chr2	158409980	CTGxCGG	C	G	66_S3_L001_R1_001	64_Jiri_S1_L001_R1_001	0	NOVEL	COVERED	0.999919	0.999919	1	1	1	174	0	23.4081	31.7628	10.2614	25.1279	0.186813	0.02	0.768163
ACR_S9_1	chr2	161060007	161060007	A	C	intronic	Chd6	NA	NA	NA	intronic	Chd6	NA	NA	NA	intronic	ENSMUSG00000057133	NA	NA	NA	2qH2	NA	NA	-	GATTATAATAAGTCCCACACA	chr2	161060007	ATAxGTC	A	C	66_S3_L001_R1_001	64_Jiri_S1_L001_R1_001	0	NOVEL	COVERED	1	1	1	1	1	518	0	-26.1877	23.9771	9.29489	16.7921	0.076923	0.02	4.43257
ACR_S9_1	chr2	163467119	163467119	G	C	intergenic	Gdap1l1,Fitm2	dist=11795;dist=1584	NA	NA	ncRNA_exonic	D930001I22Rik	NA	NA	NA	UTR3	ENSMUSG00000048486	ENSMUST00000109418:c.*2384C>G	NA	NA	2qH3	NA	NA	NA	TGAGCCTCTGGCCACATCCTG	chr2	163467119	CTGxCCA	G	C	66_S3_L001_R1_001	64_Jiri_S1_L001_R1_001	0	NOVEL	COVERED	0.999407	0.999407	1	1	1	141	0	3.61951	15.9017	6.34057	11.4239	0.109756	0.02	0.88037
ACR_S9_1	chr2	163470021	163470021	G	A	exonic	Fitm2	NA	synonymous SNV	Fitm2:NM_173397:exon2:c.C271T:p.L91L	exonic	Fitm2	NA	synonymous SNV	Fitm2:uc008nsv.1:exon2:c.C271T:p.L91L	exonic	ENSMUSG00000048486	NA	synonymous SNV	ENSMUSG00000048486:ENSMUST00000109418:exon2:c.C271T:p.L91L	2qH3	NA	NA	-	AACCGCCGCAGGACCAGGCTG	chr2	163470021	GCAxGAC	G	A	66_S3_L001_R1_001	70_S7_L001_R1_001	0	NOVEL	COVERED	0.800159	0.800245	0.999892	0.999892	0.987855	58	0	2.98452	7.3789	0	8.47023	0.125	0.02	-0.306678
ACR_S9_1	chr2	163616984	163616984	T	G	UTR3	Ttpal	NM_029512:c.*1343T>G,NM_181734:c.*1343T>G	NA	NA	UTR3	Ttpal	uc008ntd.1:c.*1343T>G,uc008nte.1:c.*1343T>G,uc008ntf.1:c.*1674T>G	NA	NA	UTR3	ENSMUSG00000017679	ENSMUST00000171696:c.*1343T>G,ENSMUST00000109405:c.*1674T>G	NA	NA	2qH3	NA	NA	+	TGCATACAGCTTACACACAGT	chr2	163616984	AGCxTAC	T	G	66_S3_L001_R1_001	64_Jiri_S1_L001_R1_001	0	NOVEL	COVERED	0.999218	0.999218	1	1	1	132	0	8.469	17.1973	9.81913	7.28382	0.155844	0.02	0.606919
ACR_S9_1	chr2	163860205	163860205	T	A	intergenic	Kcnk15,Rims4	dist=1331;dist=3676	NA	NA	intergenic	Kcnk15,Rims4	dist=1331;dist=3676	NA	NA	UTR3	ENSMUSG00000035226	ENSMUST00000044734:c.*3698A>T	NA	NA	2qH3	NA	NA	NA	GCACTCGCTGTTGCTCAATAA	chr2	163860205	CTGxTGC	T	A	66_S3_L001_R1_001	64_Jiri_S1_L001_R1_001	0	NOVEL	COVERED	1	1	1	1	1	289	0	10.7649	36.443	10.9037	24.5298	0.120879	0.02	2.87933
ACR_S9_1	chr2	164649741	164649741	A	T	UTR3	Wfdc9	NM_001160414:c.*46T>A	NA	NA	UTR3	Wfdc9	uc008nvn.2:c.*46T>A	NA	NA	UTR3	ENSMUSG00000074594	ENSMUST00000109335:c.*46T>A	NA	NA	2qH3	NA	NA	-	GGCAGCAGGCAGCCTTCTGCC	chr2	164649741	GGCxGCC	A	T	66_S3_L001_R1_001	64_Jiri_S1_L001_R1_001	0	NOVEL	COVERED	0.984161	0.984161	1	1	0.999992	99	0	-1.13284	8.38363	5.13456	3.00179	0.089286	0.02	0.992036
ACR_S9_1	chr2	164649746	164649746	T	G	UTR3	Wfdc9	NM_001160414:c.*41A>C	NA	NA	UTR3	Wfdc9	uc008nvn.2:c.*41A>C	NA	NA	UTR3	ENSMUSG00000074594	ENSMUST00000109335:c.*41A>C	NA	NA	2qH3	NA	NA	-	CAGGCAGCCTTCTGCCCAGAC	chr2	164649746	CCTxCTG	T	G	66_S3_L001_R1_001	64_Jiri_S1_L001_R1_001	0	NOVEL	COVERED	0.979526	0.979526	1	1	0.999994	99	0	-0.719214	8.26848	5.25879	2.77561	0.092593	0.02	1.00984
ACR_S9_1	chr2	164825040	164825040	C	G	exonic	Zswim1	NA	nonsynonymous SNV	Zswim1:NM_028028:exon2:c.C211G:p.R71G	exonic	Zswim1	NA	nonsynonymous SNV	Zswim1:uc033hrj.1:exon1:c.C211G:p.R71G,Zswim1:uc008nwi.1:exon2:c.C211G:p.R71G	exonic	ENSMUSG00000017764	NA	nonsynonymous SNV	ENSMUSG00000017764:ENSMUST00000017908:exon2:c.C211G:p.R71G,ENSMUSG00000017764:ENSMUST00000132282:exon3:c.C211G:p.R71G	2qH3	NA	NA	+	AGATGGACCCCGGGTCCAGGT	chr2	164825040	CCCxGGG	C	G	66_S3_L001_R1_001	64_Jiri_S1_L001_R1_001	0	NOVEL	COVERED	0.995687	0.995687	1	1	1	124	0	-0.511489	9.15793	5.58124	3.21911	0.119403	0.02	0.810425
ACR_S9_1	chr2	167029336	167029336	G	T	exonic	Ddx27	NA	nonsynonymous SNV	Ddx27:NM_153065:exon13:c.G1475T:p.G492V	exonic	Ddx27	NA	nonsynonymous SNV	Ddx27:uc008nzb.1:exon13:c.G1475T:p.G492V	exonic	ENSMUSG00000017999	NA	nonsynonymous SNV	ENSMUSG00000017999:ENSMUST00000018143:exon13:c.G1475T:p.G492V	2qH3	NA	NA	+	GCAGCCCGCGGTCTTGACATT	chr2	167029336	GCGxTCT	G	T	66_S3_L001_R1_001	64_Jiri_S1_L001_R1_001	0	NOVEL	COVERED	0.997553	0.997553	1	1	1	160	0	9.59806	18.3662	12.697	5.17765	0.140845	0.02	0.87105
ACR_S9_1	chr2	168637524	168637524	A	C	exonic	Atp9a	NA	nonsynonymous SNV	Atp9a:NM_001289445:exon27:c.T2936G:p.L979R,Atp9a:NM_001289446:exon27:c.T2930G:p.L977R,Atp9a:NM_015731:exon27:c.T2984G:p.L995R	exonic	Atp9a	NA	nonsynonymous SNV	Atp9a:uc008obb.2:exon27:c.T2936G:p.L979R,Atp9a:uc008obc.1:exon27:c.T2984G:p.L995R,Atp9a:uc008obd.2:exon27:c.T2930G:p.L977R	exonic	ENSMUSG00000027546	NA	nonsynonymous SNV	ENSMUSG00000027546:ENSMUST00000029060:exon27:c.T2984G:p.L995R,ENSMUSG00000027546:ENSMUST00000109175:exon27:c.T2936G:p.L979R,ENSMUSG00000027546:ENSMUST00000109176:exon27:c.T3158G:p.L1053R,ENSMUSG00000027546:ENSMUST00000109177:exon27:c.T2930G:p.L977R,ENSMUSG00000027546:ENSMUST00000178504:exon27:c.T2984G:p.L995R	2qH3	NA	NA	-	GAGGAACACCAGGGAGGCAAT	chr2	168637524	ACCxGGG	A	C	66_S3_L001_R1_001	64_Jiri_S1_L001_R1_001	0	NOVEL	COVERED	0.29196	0.292001	0.99986	0.99986	0.982485	36	0	21.268	21.2805	17.2225	3.13569	0.529412	0.02	-0.148991
ACR_S9_1	chr2	181548862	181548862	C	A	intronic	Dnajc5	NA	NA	NA	intronic	Dnajc5	NA	NA	NA	intronic	ENSMUSG00000000826	NA	NA	NA	2qH4	NA	NA	+	AGCCCAGGGCCTTGTGAGTGT	chr2	181548862	GGCxTTG	C	A	66_S3_L001_R1_001	64_Jiri_S1_L001_R1_001	0	NOVEL	COVERED	0.992926	0.992926	1	1	0.999997	110	0	5.74608	14.4701	10.2702	13.7556	0.125	0.02	0.940634
ACR_S9_1	chr2	181719748	181719748	T	A	UTR3	Oprl1	NM_011012:c.*411T>A,NM_001252565:c.*411T>A	NA	NA	UTR3	Oprl1	uc008oni.2:c.*293T>A,uc008onj.2:c.*293T>A,uc008onl.2:c.*411T>A,uc012cmv.2:c.*411T>A,uc008onm.2:c.*411T>A,uc008onn.2:c.*411T>A,uc008onk.2:c.*411T>A,uc029ujh.1:c.*411T>A	NA	NA	UTR3	ENSMUSG00000027584	ENSMUST00000071585:c.*411T>A,ENSMUST00000183693:c.*1366T>A,ENSMUST00000108763:c.*411T>A,ENSMUST00000184795:c.*1249T>A,ENSMUST00000108768:c.*411T>A	NA	NA	2qH4	NA	NA	+	ATGTAGTCACTATTGTGACTA	chr2	181719748	CACxATT	T	A	66_S3_L001_R1_001	E210_S1	0	NOVEL	COVERED	0.984093	0.984161	0.999931	0.999931	0.991692	83	0	0.855676	9.65594	4.34126	5.00614	0.105263	0.02	0.895716
ACR_S9_1	chr2	181719751	181719751	T	A	UTR3	Oprl1	NM_011012:c.*414T>A,NM_001252565:c.*414T>A	NA	NA	UTR3	Oprl1	uc008oni.2:c.*296T>A,uc008onj.2:c.*296T>A,uc008onl.2:c.*414T>A,uc012cmv.2:c.*414T>A,uc008onm.2:c.*414T>A,uc008onn.2:c.*414T>A,uc008onk.2:c.*414T>A,uc029ujh.1:c.*414T>A	NA	NA	UTR3	ENSMUSG00000027584	ENSMUST00000071585:c.*414T>A,ENSMUST00000183693:c.*1369T>A,ENSMUST00000108763:c.*414T>A,ENSMUST00000184795:c.*1252T>A,ENSMUST00000108768:c.*414T>A	NA	NA	2qH4	NA	NA	+	TAGTCACTATTGTGACTACCT	chr2	181719751	TATxGTG	T	A	66_S3_L001_R1_001	E210_S1	0	NOVEL	COVERED	0.981888	0.981955	0.999931	0.999931	0.991692	82	0	1.96608	10.5	4.87897	5.30216	0.107143	0.02	1.00129
ACR_S9_1	chr3	28669351	28669351	G	C	UTR3	Tnik	NM_001163008:c.*1369G>C,NM_026910:c.*1369G>C,NM_001163007:c.*1369G>C	NA	NA	UTR3	Tnik	uc012cob.1:c.*1369G>C,uc012coc.1:c.*1369G>C,uc012cod.1:c.*1369G>C,uc008oty.1:c.*1369G>C	NA	NA	UTR3	ENSMUSG00000027692	ENSMUST00000160934:c.*4761G>C,ENSMUST00000159236:c.*1369G>C	NA	NA	3qA3	NA	NA	+	CATCTGTGCAGAGATGTGTAT	chr3	28669351	GCAxAGA	G	C	66_S3_L001_R1_001	64_Jiri_S1_L001_R1_001	0	NOVEL	COVERED	1	1	1	1	1	371	0	-28.4094	12.0471	10.7792	2.77424	0.052356	0.02	2.62629
ACR_S9_1	chr3	37420461	37420461	G	C	exonic	Spata5	NA	nonsynonymous SNV	Spata5:NM_001163511:exon1:c.G121C:p.A41P,Spata5:NM_021343:exon1:c.G121C:p.A41P	exonic	Spata5	NA	nonsynonymous SNV	Spata5:uc008pau.2:exon1:c.G121C:p.A41P,Spata5:uc008pav.2:exon1:c.G121C:p.A41P,Spata5:uc012coy.1:exon1:c.G121C:p.A41P	exonic	ENSMUSG00000027722	NA	nonsynonymous SNV	ENSMUSG00000027722:ENSMUST00000029277:exon1:c.G121C:p.A41P,ENSMUSG00000027722:ENSMUST00000108112:exon1:c.G121C:p.A41P	3qB	NA	NA	+	GAGCCCGGCGGCGCCGGGGAT	chr3	37420461	GCGxCGC	G	C	66_S3_L001_R1_001	64_Jiri_S1_L001_R1_001	0	NOVEL	COVERED	0.423459	0.423478	0.999957	0.999957	0.993897	47	0	6.35221	8.18607	0	8.36414	0.190476	0.02	-0.18275
ACR_S9_1	chr3	53480850	53480850	T	A	UTR3	Proser1	NM_173382:c.*216T>A	NA	NA	UTR3	Proser1	uc008pev.1:c.*216T>A	NA	NA	UTR3	ENSMUSG00000049504	ENSMUST00000058577:c.*216T>A	NA	NA	3qC	NA	NA	+	AATAGTATTTTAAACGTACTT	chr3	53480850	TTTxAAA	T	A	66_S3_L001_R1_001	64_Jiri_S1_L001_R1_001	0	NOVEL	COVERED	0.996233	0.996233	1	1	1	124	0	10.717	18.6227	10.699	7.73927	0.149254	0.02	0.904461
ACR_S9_1	chr3	56031640	56031640	A	G	splicing	Nbea	NM_030595:exon15:c.2115+2T>C	NA	NA	splicing	Nbea	uc033htk.1:exon15:c.2115+2T>C,uc033htl.1:exon15:c.2115+2T>C	NA	NA	splicing	ENSMUSG00000027799	ENSMUST00000029374:exon15:c.2115+2T>C	NA	NA	3qC	NA	NA	-	AATATGTTATACCTCATGCAT	chr3	56031640	TATxCCT	A	G	66_S3_L001_R1_001	64_Jiri_S1_L001_R1_001	0	NOVEL	COVERED	1	1	1	1	1	2813	0	14.3516	233.964	144.525	129.137	0.100725	0.02	29.6217
ACR_S9_1	chr3	59180059	59180059	A	T	intronic	Gpr87,Med12l	NA	NA	NA	exonic	Gpr87	NA	synonymous SNV	Gpr87:uc012cpy.1:exon1:c.T27A:p.S9S	exonic	ENSMUSG00000051431	NA	synonymous SNV	ENSMUSG00000051431:ENSMUST00000056898:exon1:c.T27A:p.S9S	3qD	NA	NA	NA	CTGCAAAAGTAGAAACATTCA	chr3	59180059	AGTxGAA	A	T	66_S3_L001_R1_001	64_Jiri_S1_L001_R1_001	0	NOVEL	COVERED	0.781006	0.78106	0.999931	0.999931	0.991692	59	0	8.63301	11.9869	6.27401	7.59445	0.176471	0.02	-0.29809
ACR_S9_1	chr3	90260794	90260794	C	T	exonic	Crtc2	NA	synonymous SNV	Crtc2:NM_028881:exon11:c.C1098T:p.G366G	exonic	Crtc2	NA	synonymous SNV	Crtc2:uc008qbv.2:exon6:c.C561T:p.G187G,Crtc2:uc008qbu.2:exon7:c.C561T:p.G187G,Crtc2:uc008qbt.2:exon11:c.C1098T:p.G366G	exonic	ENSMUSG00000027936	NA	synonymous SNV	ENSMUSG00000027936:ENSMUST00000184882:exon9:c.C843T:p.G281G,ENSMUSG00000027936:ENSMUST00000029545:exon11:c.C1098T:p.G366G	3qF1	NA	NA	+	AGCTCCAGGGCTCCCATAGTC	chr3	90260794	GGGxTCC	C	T	66_S3_L001_R1_001	64_Jiri_S1_L001_R1_001	0	NOVEL	COVERED	0.934492	0.934492	1	1	1	100	0	18.0538	20.8867	14.1882	10.8598	0.23913	0.02	-0.40168
ACR_S9_1	chr3	107303256	107303256	T	C	exonic	Slc16a4	NA	nonsynonymous SNV	Slc16a4:NM_146136:exon7:c.T1241C:p.L414P	exonic	Slc16a4	NA	nonsynonymous SNV	Slc16a4:uc008qwy.2:exon7:c.T1241C:p.L414P	exonic	ENSMUSG00000027896	NA	nonsynonymous SNV	ENSMUSG00000027896:ENSMUST00000029502:exon7:c.T1241C:p.L414P,ENSMUSG00000027896:ENSMUST00000106723:exon7:c.T1241C:p.L414P	3qF2.3	NA	NA	+	TACCTGGCACTAATACTGCCA	chr3	107303256	CACxAAT	T	C	66_S3_L001_R1_001	64_Jiri_S1_L001_R1_001	0	NOVEL	COVERED	0.835715	0.835716	0.999999	0.999999	0.999806	72	0	1.0772	6.46938	0	6.74285	0.111111	0.02	-0.324333
ACR_S9_1	chr3	108189598	108189598	C	G	UTR3	Amigo1	NM_001004293:c.*933C>G,NM_146137:c.*933C>G	NA	NA	UTR3	Amigo1	uc008qyg.2:c.*933C>G,uc008qyh.2:c.*933C>G	NA	NA	UTR3	ENSMUSG00000050947	ENSMUST00000050909:c.*933C>G,ENSMUST00000106656:c.*933C>G	NA	NA	3qF2.3	NA	NA	+	GATGTAGCAGCCAGCCAGACC	chr3	108189598	CAGxCAG	C	G	66_S3_L001_R1_001	64_Jiri_S1_L001_R1_001	0	NOVEL	COVERED	0.934492	0.934492	1	1	1	96	0	16.4529	19.8248	3.03955	16.8727	0.217391	0.02	-0.402708
ACR_S9_1	chr3	129739968	129739968	C	G	exonic	Egf	NA	nonsynonymous SNV	Egf:NM_010113:exon2:c.G222C:p.Q74H	exonic	Egf	NA	nonsynonymous SNV	Egf:uc008rih.2:exon2:c.G222C:p.Q74H,Egf:uc008rij.2:exon2:c.G222C:p.Q74H	exonic	ENSMUSG00000028017	NA	nonsynonymous SNV	ENSMUSG00000028017:ENSMUST00000029653:exon2:c.G222C:p.Q74H	3qG3	NA	NA	-	CCACCAATTGCTGGTGATTTG	chr3	129739968	TTGxTGG	C	G	66_S3_L001_R1_001	64_Jiri_S1_L001_R1_001	0	NOVEL	COVERED	0.999487	0.999487	1	1	1	171	0	-2.35616	11.8768	12.7129	6.42122	0.085366	0.02	0.774298
ACR_S9_1	chr3	130598337	130598337	C	G	UTR3	Col25a1	NM_029838:c.*3235C>G,NM_001244952:c.*3235C>G,NM_198711:c.*2645C>G	NA	NA	UTR3	Col25a1	uc033hzs.1:c.*3235C>G,uc033hzt.1:c.*3235C>G,uc033hzu.1:c.*2645C>G,uc033hzv.1:c.*3235C>G,uc033hzw.1:c.*2645C>G	NA	NA	UTR3	ENSMUSG00000058897	ENSMUST00000106353:c.*2645C>G	NA	NA	3qG3	NA	NA	+	TAGAAAGTTTCTGGTTTTGTA	chr3	130598337	TTTxTGG	C	G	66_S3_L001_R1_001	64_Jiri_S1_L001_R1_001	0	NOVEL	COVERED	0.999895	0.999895	1	1	1	185	0	39.681	44.715	26.8351	21.8063	0.25	0.02	0.808882
ACR_S9_1	chr3	145944136	145944136	T	C	UTR3	2410004B18Rik	NM_025555:c.*266T>C	NA	NA	UTR3	2410004B18Rik	uc008rqt.1:c.*266T>C,uc008rqu.1:c.*398T>C	NA	NA	UTR3	ENSMUSG00000036873	ENSMUST00000039571:c.*266T>C,ENSMUST00000134575:c.*639T>C	NA	NA	3qH2	NA	NA	+	CACATGGACATGCCAATGTTC	chr3	145944136	ACAxGCC	T	C	66_S3_L001_R1_001	64_Jiri_S1_L001_R1_001	0	NOVEL	COVERED	1	1	1	1	1	584	0	110.683	123.922	96.7503	56.6938	0.263566	0.02	4.72296
ACR_S9_1	chr3	152819965	152819965	T	C	downstream	St6galnac5	NA	NA	NA	downstream	St6galnac5	NA	NA	NA	UTR3	ENSMUSG00000039037	ENSMUST00000044278:c.*1546A>G	NA	NA	3qH3	NA	NA	-	TAACACTTTGTCTTTGCTGTC	chr3	152819965	TTGxCTT	T	C	66_S3_L001_R1_001	64_Jiri_S1_L001_R1_001	0	NOVEL	COVERED	1	1	1	1	1	327	0	-3.64663	26.7756	11.1774	19.409	0.089385	0.02	3.12663
ACR_S9_1	chr4	8855218	8855218	C	A	exonic	Chd7	NA	nonsynonymous SNV	Chd7:NM_001277149:exon31:c.C6446A:p.S2149Y	exonic	Chd7	NA	nonsynonymous SNV	Chd7:uc008rxz.2:exon31:c.C6446A:p.S2149Y	exonic	ENSMUSG00000041235	NA	nonsynonymous SNV	ENSMUSG00000041235:ENSMUST00000039267:exon31:c.C6446A:p.S2149Y,ENSMUSG00000041235:ENSMUST00000051558:exon31:c.C6446A:p.S2149Y	4qA1	NA	NA	+	GTCATTTCCTCTGCTCACGTT	chr4	8855218	CCTxTGC	C	A	66_S3_L001_R1_001	64_Jiri_S1_L001_R1_001	0	NOVEL	COVERED	0.760834	0.760887	0.999931	0.999931	0.991692	58	0	2.44299	6.78969	5.44826	1.38687	0.125	0.02	-0.287586
ACR_S9_1	chr4	24505436	24505436	G	C	splicing	Mms22l	NM_199467:exon6:c.694+1G>C	NA	NA	splicing	Mms22l	uc008sdv.2:exon6:c.694+1G>C,uc008sdx.2:exon6:c.694+1G>C,uc008sdw.2:exon6:c.694+1G>C	NA	NA	splicing	ENSMUSG00000045751	ENSMUST00000108222:exon6:c.694+1G>C,ENSMUST00000050446:exon6:c.694+1G>C,ENSMUST00000172622:exon5:c.478+1G>C	NA	NA	4qA3	NA	NA	+	GAAAAATTGAGTGAGTTTATG	chr4	24505436	TGAxTGA	G	C	66_S3_L001_R1_001	64_Jiri_S1_L001_R1_001	0	NOVEL	COVERED	0.800211	0.800245	0.999957	0.999957	0.993897	61	0	1.4935	6.61932	1.26059	5.39677	0.114286	0.02	-0.306531
ACR_S9_1	chr4	32580602	32580602	C	G	UTR3	Bach2	NM_001109661:c.*306C>G	NA	NA	UTR3	Bach2	uc012dbg.1:c.*306C>G	NA	NA	UTR3	ENSMUSG00000040270	ENSMUST00000108180:c.*306C>G,ENSMUST00000037416:c.*306C>G,ENSMUST00000171600:c.*306C>G	NA	NA	4qA5	NA	NA	+	GACTACACCTCTAGGACCCAA	chr4	32580602	CCTxTAG	C	G	66_S3_L001_R1_001	64_Jiri_S1_L001_R1_001	0	NOVEL	COVERED	0.999948	0.999948	1	1	1	195	0	38.1029	44.5748	32.0246	22.7983	0.229167	0.02	0.738813
ACR_S9_1	chr4	34025025	34025025	A	G	UTR3	Spaca1	NM_001290443:c.*82T>C	NA	NA	UTR3	Spaca1	uc008sfx.1:c.*82T>C,uc008sfy.1:c.*82T>C	NA	NA	UTR3	ENSMUSG00000028264	ENSMUST00000084734:c.*82T>C,ENSMUST00000108148:c.*82T>C	NA	NA	4qA5	NA	NA	-	TGTATTGTCCATATTATAGAA	chr4	34025025	TCCxTAT	A	G	66_S3_L001_R1_001	64_Jiri_S1_L001_R1_001	0	NOVEL	COVERED	0.999559	0.999559	1	1	1	164	0	18.987	26.6356	7.07944	23.5119	0.190476	0.02	0.668307
ACR_S9_1	chr4	57193473	57193473	T	A	UTR3	Ptpn3	NM_011207:c.*812A>T	NA	NA	UTR3	Ptpn3	uc008sya.2:c.*812A>T	NA	NA	UTR3	ENSMUSG00000038764	ENSMUST00000075637:c.*812A>T	NA	NA	4qB3	NA	NA	-	GTTTCAAGTGTGAGAGCTTGA	chr4	57193473	GTGxGAG	T	A	66_S3_L001_R1_001	64_Jiri_S1_L001_R1_001	0	NOVEL	COVERED	0.99993	0.99993	1	1	1	198	0	-7.10829	10.1044	0.878607	9.05823	0.075269	0.02	0.773908
ACR_S9_1	chr4	57711295	57711295	A	T	UTR3	Palm2	NM_172868:c.*1108A>T	NA	NA	UTR3	Palm2	uc008syg.2:c.*1108A>T	NA	NA	UTR3	ENSMUSG00000090053	ENSMUST00000102905:c.*1108A>T,ENSMUST00000102904:c.*1108A>T	NA	NA	4qB3	NA	NA	+	TTTTTTTTTAATTTAATATCC	chr4	57711295	TTAxTTT	A	T	66_S3_L001_R1_001	E210_S1	0	NOVEL	COVERED	1	1	1	1	1	283	0	-20.3074	8.48045	9.13381	0	0.128079	0.02	1.42338
ACR_S9_1	chr4	63370990	63370990	G	C	exonic	Akna	NA	nonsynonymous SNV	Akna:NM_001045514:exon20:c.C3695G:p.T1232S	exonic	Akna	NA	nonsynonymous SNV	Akna:uc008tgb.2:exon20:c.C3695G:p.T1232S	exonic	ENSMUSG00000039158	NA	nonsynonymous SNV	ENSMUSG00000039158:ENSMUST00000035724:exon20:c.C3695G:p.T1232S	4qB3	NA	NA	-	GCCCCGTGTGGTGTCTCTAGA	chr4	63370990	GTGxTGT	G	C	66_S3_L001_R1_001	70_S7_L001_R1_001	0	NOVEL	UNCOVERED	0.138793	0.139832	0.99257	0.99257	0	20	0	5.92188	6.60227	0	6.60235	0.25	0.02	-0.105175
ACR_S9_1	chr4	74281040	74281040	A	T	intronic	Kdm4c	NA	NA	NA	intronic	Kdm4c	NA	NA	NA	intronic	ENSMUSG00000028397	NA	NA	NA	4qC3	NA	NA	+	TGTGGTTTTTAAAAGTTTTTG	chr4	74281040	TTTxAAA	A	T	66_S3_L001_R1_001	64_Jiri_S1_L001_R1_001	0	NOVEL	COVERED	1	1	1	1	1	855	0	198.314	220.362	61.4727	198.963	0.257831	0.02	8.32479
ACR_S9_1	chr4	83635706	83635706	T	C	exonic	Ccdc171	NA	synonymous SNV	Ccdc171:NM_001081012:exon11:c.T1288C:p.L430L	exonic	Ccdc171	NA	synonymous SNV	Ccdc171:uc008tlc.1:exon11:c.T1288C:p.L430L	exonic	ENSMUSG00000052407	NA	synonymous SNV	ENSMUSG00000052407:ENSMUST00000053414:exon11:c.T1288C:p.L430L	4qC3	NA	NA	+	GGAATCCATCTTGGGCAGCTT	chr4	83635706	ATCxTGG	T	C	66_S3_L001_R1_001	64_Jiri_S1_L001_R1_001	0	NOVEL	COVERED	0.693668	0.693668	1	1	0.999992	71	0	10.1358	12.4452	3.58177	12.3403	0.206897	0.02	-0.254267
ACR_S9_1	chr4	84947604	84947604	T	G	exonic	Cntln	NA	nonsynonymous SNV	Cntln:NM_175275:exon3:c.T496G:p.L166V,Cntln:NM_177385:exon3:c.T496G:p.L166V	exonic	Cntln	NA	nonsynonymous SNV	Cntln:uc008tlk.2:exon3:c.T496G:p.L166V,Cntln:uc008tll.2:exon3:c.T496G:p.L166V	exonic	ENSMUSG00000038070	NA	nonsynonymous SNV	ENSMUSG00000038070:ENSMUST00000047023:exon3:c.T496G:p.L166V,ENSMUSG00000038070:ENSMUST00000102819:exon3:c.T496G:p.L166V,ENSMUSG00000038070:ENSMUST00000169371:exon3:c.T496G:p.L166V	4qC4	NA	NA	+	TCTGGAAATTTTACAAGTCAA	chr4	84947604	ATTxTAC	T	G	66_S3_L001_R1_001	70_S7_L001_R1_001	0	NOVEL	COVERED	1	1	1	1	1	1224	0	-96.0638	20.9837	14.9414	10.3202	0.037849	0.02	10.6402
ACR_S9_1	chr4	86342244	86342244	T	C	exonic	Adamtsl1	NA	synonymous SNV	Adamtsl1:NM_029967:exon18:c.T2715C:p.A905A	exonic	Adamtsl1	NA	synonymous SNV	Adamtsl1:uc008tls.3:exon6:c.T1269C:p.A423A,Adamtsl1:uc009vcq.2:exon18:c.T2715C:p.A905A	exonic	ENSMUSG00000066113	NA	synonymous SNV	ENSMUSG00000066113:ENSMUST00000107178:exon18:c.T2715C:p.A905A,ENSMUSG00000066113:ENSMUST00000141889:exon19:c.T2691C:p.A897A	4qC4	NA	NA	+	TCAGCTCGGCTCATGTCACCG	chr4	86342244	GGCxCAT	T	C	66_S3_L001_R1_001	64_Jiri_S1_L001_R1_001	0	NOVEL	COVERED	0.959859	0.959859	1	1	1	109	0	15.0465	18.8182	10.4961	10.9707	0.208333	0.02	-0.437583
ACR_S9_1	chr4	98118609	98118609	G	C	UTR3	Nfia	NM_001122952:c.*7374G>C,NM_010905:c.*7374G>C,NM_001122953:c.*7374G>C	NA	NA	UTR3	Nfia	uc008tty.2:c.*7374G>C,uc008tts.2:c.*7374G>C,uc008ttu.2:c.*7374G>C,uc008ttv.2:c.*7374G>C,uc008ttw.2:c.*7315G>C	NA	NA	UTR3	ENSMUSG00000028565	ENSMUST00000075448:c.*7374G>C,ENSMUST00000092532:c.*7374G>C,ENSMUST00000107062:c.*7315G>C,ENSMUST00000052018:c.*7374G>C,ENSMUST00000107057:c.*7374G>C	NA	NA	4qC6	NA	NA	+	TGTGCCTCTAGCATATGTGTA	chr4	98118609	CTAxCAT	G	C	66_S3_L001_R1_001	64_Jiri_S1_L001_R1_001	0	NOVEL	COVERED	0.999999	0.999999	1	1	1	236	0	5.08293	23.2408	12.1436	19.7213	0.113821	0.02	2.01134
ACR_S9_1	chr4	98491775	98491775	A	C	intronic	Inadl	NA	NA	NA	intronic	Inadl	NA	NA	NA	intronic	ENSMUSG00000061859	NA	NA	NA	4qC6	NA	NA	+	TTGGTATAGAAGTGTAGTTAA	chr4	98491775	AGAxGTG	A	C	66_S3_L001_R1_001	64_Jiri_S1_L001_R1_001	0	NOVEL	COVERED	0.800245	0.800245	1	1	0.999997	81	0	9.96518	12.3529	4.849	9.44475	0.228571	0.02	-0.306682
ACR_S9_1	chr4	109981800	109981800	T	G	exonic	Dmrta2	NA	nonsynonymous SNV	Dmrta2:NM_172296:exon3:c.T743G:p.L248R	exonic	Dmrta2	NA	nonsynonymous SNV	Dmrta2:uc008ucv.1:exon3:c.T743G:p.L248R	exonic	ENSMUSG00000047143	NA	nonsynonymous SNV	ENSMUSG00000047143:ENSMUST00000061187:exon3:c.T743G:p.L248R	4qC7	NA	NA	+	GGGTCGCCTCTGGCCCGGGCC	chr4	109981800	CTCxGGC	T	G	66_S3_L001_R1_001	64_Jiri_S1_L001_R1_001	0	NOVEL	COVERED	0.999968	0.999968	1	1	1	217	0	31.1681	38.3579	13.9231	24.9187	0.22	0.02	2.11669
ACR_S9_1	chr4	115041256	115041256	A	T	exonic	Stil	NA	nonsynonymous SNV	Stil:NM_009185:exon17:c.A3082T:p.S1028C	exonic	Stil	NA	nonsynonymous SNV	Stil:uc008uej.2:exon14:c.A2404T:p.S802C,Stil:uc008uei.2:exon16:c.A2404T:p.S802C,Stil:uc008ueh.2:exon17:c.A3082T:p.S1028C,Stil:uc012djb.1:exon17:c.A3052T:p.S1018C,Stil:uc012dja.1:exon18:c.A1771T:p.S591C	exonic	ENSMUSG00000028718	NA	nonsynonymous SNV	ENSMUSG00000028718:ENSMUST00000030490:exon17:c.A3082T:p.S1028C	4qD1	NA	NA	+	GAGCAGCCTAAGTCCCACTGG	chr4	115041256	CTAxGTC	A	T	66_S3_L001_R1_001	64_Jiri_S1_L001_R1_001	0	NOVEL	COVERED	0.986153	0.986153	1	1	0.999994	103	0	16.623	21.8283	20.8549	9.77154	0.189655	0.02	0.992066
ACR_S9_1	chr4	116158240	116158240	T	G	intronic	Pomgnt1	NA	NA	NA	intronic	Pomgnt1	NA	NA	NA	intronic	ENSMUSG00000028700	NA	NA	NA	4qD1	NA	NA	+	GAGTAAGGAATCTAGCTTCCT	chr4	116158240	GAAxCTA	T	G	66_S3_L001_R1_001	E210_S1	0	NOVEL	COVERED	0.909066	0.909069	0.999997	0.999997	0.999646	73	0	2.05154	8.28547	3.60063	4.56186	0.116279	0.02	-0.37693
ACR_S9_1	chr4	116637790	116637790	T	A	exonic	Akr1a1	NA	nonsynonymous SNV	Akr1a1:NM_021473:exon8:c.A884T:p.N295I	exonic	Akr1a1	NA	nonsynonymous SNV	Akr1a1:uc008uha.2:exon8:c.A884T:p.N295I,Akr1a1:uc008uhb.2:exon8:c.A884T:p.N295I	exonic	ENSMUSG00000028692	NA	nonsynonymous SNV	ENSMUSG00000028692:ENSMUST00000030455:exon8:c.A884T:p.N295I	4qD1	NA	NA	-	ATACCGCCAATTTTTGTTCAG	chr4	116637790	CAAxTTT	T	A	66_S3_L001_R1_001	64_Jiri_S1_L001_R1_001	0	NOVEL	COVERED	0.92664	0.92664	1	1	0.999912	82	0	16.7369	19.9317	13.7722	14.8678	0.222222	0.02	-0.394045
ACR_S9_1	chr4	127026912	127026912	A	G	intronic	Sfpq	NA	NA	NA	intronic	Sfpq	NA	NA	NA	intronic	ENSMUSG00000028820	NA	NA	NA	4qD2.2	NA	NA	+	TTGTAAGTGTACACTCACTCA	chr4	127026912	TGTxCAC	A	G	66_S3_L001_R1_001	64_Jiri_S1_L001_R1_001	0	NOVEL	COVERED	0.851983	0.851984	0.999999	0.999999	0.999855	74	0	4.35783	9.36728	3.29817	10.9031	0.131579	0.02	-0.333084
ACR_S9_1	chr4	132579562	132579562	T	G	exonic	Ptafr	NA	nonsynonymous SNV	Ptafr:NM_001081211:exon2:c.T262G:p.F88V	exonic	Ptafr	NA	nonsynonymous SNV	Ptafr:uc033ifb.1:exon1:c.T262G:p.F88V,Ptafr:uc008vbn.1:exon2:c.T262G:p.F88V	exonic	ENSMUSG00000056529	NA	nonsynonymous SNV	ENSMUSG00000056529:ENSMUST00000070690:exon2:c.T262G:p.F88V	4qD2.3	NA	NA	+	TCTACCCAACTTCCTGTGCAA	chr4	132579562	AACxTCC	T	G	66_S3_L001_R1_001	64_Jiri_S1_L001_R1_001	0	NOVEL	COVERED	0.948402	0.948402	1	1	1	113	0	-0.635875	6.85396	3.37066	4.76349	0.104167	0.02	-0.420244
ACR_S9_1	chr4	133198995	133198995	C	T	downstream	Wasf2	NA	NA	NA	ncRNA_exonic	AK199358	NA	NA	NA	UTR3	ENSMUSG00000028868	ENSMUST00000084241:c.*3121C>T	NA	NA	4qD2.3	NA	NA	+	GGGCCAGGAGCTCCAACTCCG	chr4	133198995	GAGxTCC	C	T	66_S3_L001_R1_001	64_Jiri_S1_L001_R1_001	0	NOVEL	COVERED	0.69362	0.693668	0.999931	0.999931	0.991692	55	0	11.8121	13.0664	13.659	0	0.269231	0.02	-0.253857
ACR_S9_1	chr4	134372164	134372164	T	C	UTR5	Extl1	NM_019578:c.-446A>G	NA	NA	UTR5	Extl1	uc012dmu.1:c.-446A>G	NA	NA	UTR5	ENSMUSG00000028838	ENSMUST00000030643:c.-446A>G	NA	NA	4qD3	NA	NA	-	CGGGAGGGGGTGGCCAAGGAT	chr4	134372164	GGGxGGC	T	C	66_S3_L001_R1_001	64_Jiri_S1_L001_R1_001	0	NOVEL	COVERED	0.986153	0.986153	1	1	1	115	0	20.0707	23.9286	16.5446	10.1543	0.22807	0.02	0.992484
ACR_S9_1	chr4	135537561	135537561	A	C	UTR3	Stpg1	NM_030189:c.*908A>C	NA	NA	UTR3	Stpg1	uc008vgq.1:c.*908A>C,uc012dnb.1:c.*908A>C	NA	NA	UTR3	ENSMUSG00000028801	ENSMUST00000063707:c.*908A>C	NA	NA	4qD3	NA	NA	+	TTTTCTGAGAACTCTGCCTCC	chr4	135537561	AGAxCTC	A	C	66_S3_L001_R1_001	64_Jiri_S1_L001_R1_001	0	NOVEL	COVERED	0.835626	0.835716	0.999892	0.999892	0.987855	60	0	5.0327	7.68335	0	8.72611	0.212121	0.02	-0.320341
ACR_S9_1	chr4	135895383	135895383	G	T	upstream	Cnr2	NA	NA	NA	upstream	Cnr2	NA	NA	NA	upstream	ENSMUSG00000062585	NA	NA	NA	4qD3	NA	NA	+	GTGGCACTGAGGACCCAGAGG	chr4	135895383	TGAxGAC	G	T	66_S3_L001_R1_001	64_Jiri_S1_L001_R1_001	0	NOVEL	COVERED	0.800245	0.800245	1	1	1	101	0	5.06818	9.12898	5.17112	5.98074	0.147059	0.02	-0.306048
ACR_S9_1	chr4	135971916	135971916	C	G	intronic	Lypla2	NA	NA	NA	intronic	Lypla2	NA	NA	NA	UTR5	ENSMUSG00000028670	ENSMUST00000105852:c.-979G>C	NA	NA	4qD3	NA	NA	-	GGTGTTGGGACTCCCAACACA	chr4	135971916	GGAxTCC	C	G	66_S3_L001_R1_001	64_Jiri_S1_L001_R1_001	0	NOVEL	COVERED	0.760887	0.760887	1	1	1	90	0	2.18241	6.82421	3.73947	2.89415	0.121212	0.02	-0.289272
ACR_S9_1	chr4	141328736	141328736	T	C	UTR3	Epha2	NM_010139:c.*218T>C	NA	NA	UTR3	Epha2	uc008voc.2:c.*218T>C	NA	NA	UTR3	ENSMUSG00000006445	ENSMUST00000006614:c.*218T>C	NA	NA	4qD3	NA	NA	+	GCTAAGCACTTAGCAGTTTGC	chr4	141328736	ACTxAGC	T	C	66_S3_L001_R1_001	64_Jiri_S1_L001_R1_001	0	NOVEL	COVERED	0.997898	0.997898	1	1	1	168	0	-5.20955	7.98433	8.51162	5.20287	0.071429	0.02	0.861252
ACR_S9_1	chr4	148041745	148041745	G	A	exonic	Mthfr	NA	nonsynonymous SNV	Mthfr:NM_001161798:exon2:c.G272A:p.R91H,Mthfr:NM_010840:exon2:c.G149A:p.R50H	exonic	Mthfr	NA	nonsynonymous SNV	Mthfr:uc008vtw.1:exon1:c.G149A:p.R50H,Mthfr:uc008vtu.2:exon2:c.G149A:p.R50H,Mthfr:uc008vtv.1:exon2:c.G149A:p.R50H,Mthfr:uc008vtx.2:exon2:c.G272A:p.R91H	exonic	ENSMUSG00000029009	NA	nonsynonymous SNV	ENSMUSG00000029009:ENSMUST00000069604:exon2:c.G272A:p.R91H,ENSMUSG00000029009:ENSMUST00000097788:exon2:c.G149A:p.R50H,ENSMUSG00000029009:ENSMUST00000141283:exon2:c.G149A:p.R50H,ENSMUSG00000029009:ENSMUST00000152498:exon2:c.G197A:p.R66H	4qE2	NA	NA	+	AAGATGAGGCGCAGAATGGAC	chr4	148041745	GGCxCAG	G	A	66_S3_L001_R1_001	E210_S1	0	NOVEL	COVERED	0.522098	0.522161	0.999879	0.999879	0.986224	46	0	5.15606	7.63094	0	7.887	0.166667	0.02	-0.208916
ACR_S9_1	chr4	153964991	153964991	A	T	UTR3	Dffb	NM_007859:c.*379T>A	NA	NA	UTR3	Dffb	uc008wav.2:c.*379T>A	NA	NA	UTR3	ENSMUSG00000029027	ENSMUST00000030893:c.*379T>A	NA	NA	4qE2	NA	NA	-	GAGTCATGAAATTCATGACAG	chr4	153964991	GAAxTTC	A	T	66_S3_L001_R1_001	64_Jiri_S1_L001_R1_001	0	NOVEL	COVERED	0.963774	0.963774	1	1	1	111	0	3.65096	10.4669	4.95436	5.30043	0.122449	0.02	1.06241
ACR_S9_1	chr4	156169200	156169200	G	C	intronic	Agrn	NA	NA	NA	intronic	Agrn	NA	NA	NA	intronic	ENSMUSG00000041936	NA	NA	NA	4qE2	NA	NA	-	GAGAAACCTGGCTGGTGCCCA	chr4	156169200	CTGxCTG	G	C	66_S3_L001_R1_001	64_Jiri_S1_L001_R1_001	0	NOVEL	COVERED	0.997898	0.997898	1	1	1	145	0	14.6082	21.7695	3.70049	17.7203	0.164179	0.02	0.959976
ACR_S9_1	chr5	3609935	3609935	G	A	exonic	Pex1	NA	nonsynonymous SNV	Pex1:NM_027777:exon6:c.G1318A:p.V440I,Pex1:NM_001293806:exon7:c.G1438A:p.V480I	exonic	Pex1	NA	nonsynonymous SNV	Pex1:uc008whg.1:exon2:c.G13A:p.V5I,Pex1:uc008whf.1:exon6:c.G1318A:p.V440I,Pex1:uc008whe.1:exon7:c.G1438A:p.V480I	exonic	ENSMUSG00000005907	NA	nonsynonymous SNV	ENSMUSG00000005907:ENSMUST00000006061:exon6:c.G1318A:p.V440I,ENSMUSG00000005907:ENSMUST00000121291:exon7:c.G1438A:p.V480I	5qA1	NA	NA	+	GCTTCCTTTGGTAATATCAAA	chr5	3609935	TTGxTAA	G	A	66_S3_L001_R1_001	64_Jiri_S1_L001_R1_001	0	NOVEL	COVERED	0.926576	0.92664	0.999931	0.999931	0.991692	70	0	-1.32756	6.3588	2.73649	3.66375	0.088889	0.02	-0.394521
ACR_S9_1	chr5	3609938	3609938	A	T	exonic	Pex1	NA	nonsynonymous SNV	Pex1:NM_027777:exon6:c.A1321T:p.I441L,Pex1:NM_001293806:exon7:c.A1441T:p.I481L	exonic	Pex1	NA	nonsynonymous SNV	Pex1:uc008whg.1:exon2:c.A16T:p.I6L,Pex1:uc008whf.1:exon6:c.A1321T:p.I441L,Pex1:uc008whe.1:exon7:c.A1441T:p.I481L	exonic	ENSMUSG00000005907	NA	nonsynonymous SNV	ENSMUSG00000005907:ENSMUST00000006061:exon6:c.A1321T:p.I441L,ENSMUSG00000005907:ENSMUST00000121291:exon7:c.A1441T:p.I481L	5qA1	NA	NA	+	TCCTTTGGTAATATCAAAGGA	chr5	3609938	GTAxTAT	A	T	66_S3_L001_R1_001	E210_S1	0	NOVEL	COVERED	0.909068	0.909069	0.999999	0.999999	0.999806	78	0	-0.517015	6.64074	2.76262	3.93254	0.093023	0.02	-0.376808
ACR_S9_1	chr5	3609941	3609941	T	C	exonic	Pex1	NA	nonsynonymous SNV	Pex1:NM_027777:exon6:c.T1324C:p.S442P,Pex1:NM_001293806:exon7:c.T1444C:p.S482P	exonic	Pex1	NA	nonsynonymous SNV	Pex1:uc008whg.1:exon2:c.T19C:p.S7P,Pex1:uc008whf.1:exon6:c.T1324C:p.S442P,Pex1:uc008whe.1:exon7:c.T1444C:p.S482P	exonic	ENSMUSG00000005907	NA	nonsynonymous SNV	ENSMUSG00000005907:ENSMUST00000006061:exon6:c.T1324C:p.S442P,ENSMUSG00000005907:ENSMUST00000121291:exon7:c.T1444C:p.S482P	5qA1	NA	NA	+	TTTGGTAATATCAAAGGAAGA	chr5	3609941	ATAxCAA	T	C	66_S3_L001_R1_001	64_Jiri_S1_L001_R1_001	0	NOVEL	COVERED	0.90903	0.909069	0.999957	0.999957	0.993897	69	0	-0.716085	6.44231	2.56546	3.93248	0.093023	0.02	-0.376775
ACR_S9_1	chr5	21998087	21998087	C	A	splicing	Reln	NM_011261:exon27:c.3715-1G>T	NA	NA	splicing	Reln	uc008wpi.1:exon27:c.3715-1G>T,uc033ihv.1:exon27:c.3715-1G>T,uc008wpk.1:exon4:c.505-1G>T	NA	NA	splicing	ENSMUSG00000042453	ENSMUST00000161356:exon27:c.3715-1G>T,ENSMUST00000062372:exon27:c.3715-1G>T	NA	NA	5qA3	NA	NA	-	CATAGAAGTTCTATTAGGGAC	chr5	21998087	GTTxTAT	C	A	66_S3_L001_R1_001	64_Jiri_S1_L001_R1_001	0	NOVEL	COVERED	0.954491	0.954491	1	1	1	102	0	6.63029	12.6286	7.08676	9.22514	0.142857	0.02	-0.42889
ACR_S9_1	chr5	22018978	22018978	T	A	exonic	Reln	NA	unknown	UNKNOWN	exonic	Reln	NA	synonymous SNV	Reln:uc008wpi.1:exon21:c.A2772T:p.G924G,Reln:uc008wpl.1:exon21:c.A2772T:p.G924G,Reln:uc033ihv.1:exon21:c.A2772T:p.G924G	exonic	ENSMUSG00000042453	NA	synonymous SNV	ENSMUSG00000042453:ENSMUST00000062372:exon21:c.A2772T:p.G924G,ENSMUSG00000042453:ENSMUST00000161356:exon21:c.A2772T:p.G924G	5qA3	NA	NA	-	TATAGGATGCTCCGATCTGCA	chr5	22018978	TGCxCCG	T	A	66_S3_L001_R1_001	64_Jiri_S1_L001_R1_001	0	NOVEL	COVERED	0.997163	0.997163	1	1	1	130	0	5.85017	15.4934	11.0913	6.31992	0.126761	0.02	0.877921
ACR_S9_1	chr5	24400811	24400811	G	T	exonic	Abcb8	NA	nonsynonymous SNV	Abcb8:NM_029020:exon4:c.G616T:p.A206S	exonic	Abcb8	NA	nonsynonymous SNV	Abcb8:uc008wrg.1:exon4:c.G616T:p.A206S,Abcb8:uc008wrh.1:exon4:c.G616T:p.A206S	exonic	ENSMUSG00000028973	NA	nonsynonymous SNV	ENSMUSG00000028973:ENSMUST00000073076:exon4:c.G616T:p.A206S,ENSMUSG00000028973:ENSMUST00000115074:exon4:c.G616T:p.A206S,ENSMUSG00000028973:ENSMUST00000115077:exon5:c.G616T:p.A206S	5qA3	NA	NA	+	TGAGCGCATGGCCATGGACAT	chr5	24400811	ATGxCCA	G	T	66_S3_L001_R1_001	E210_S1	0	NOVEL	COVERED	0.800136	0.800245	0.999863	0.999863	0.983538	55	0	1.47979	6.37306	3.48398	4.77286	0.117647	0.02	-0.306794
ACR_S9_1	chr5	24803458	24803458	T	A	UTR3	Rheb	NM_053075:c.*206A>T	NA	NA	UTR3	Rheb	uc008wsj.1:c.*206A>T	NA	NA	UTR3	ENSMUSG00000028945	ENSMUST00000030787:c.*206A>T	NA	NA	5qA3	NA	NA	-	AAAATATGATTGTTTAAAATT	chr5	24803458	GATxGTT	T	A	66_S3_L001_R1_001	64_Jiri_S1_L001_R1_001	0	NOVEL	COVERED	1	1	1	1	1	1172	0	-7.08908	94.3296	37.2033	78.5841	0.091211	0.02	13.4602
ACR_S9_1	chr5	30952803	30952803	C	A	ncRNA_intronic	Mir6369	NA	NA	NA	UTR3	Preb	uc012dui.1:c.*2840G>T,uc008wwr.2:c.*2881G>T	NA	NA	ncRNA_intronic	ENSMUSG00000006638	NA	NA	NA	5qB1	NA	NA	+	ATCCTTAAGGCTGGATTCCGG	chr5	30952803	AGGxTGG	C	A	66_S3_L001_R1_001	70_S7_L001_R1_001	0	NOVEL	COVERED	0.989542	0.989542	1	1	0.999997	107	0	3.09397	12.015	9.52115	2.71268	0.114754	0.02	0.86863
ACR_S9_1	chr5	31530710	31530710	A	G	exonic	Slc4a1ap	NA	nonsynonymous SNV	Slc4a1ap:NM_009206:exon3:c.A937G:p.I313V	exonic	Slc4a1ap	NA	nonsynonymous SNV	Slc4a1ap:uc008wyp.1:exon3:c.A937G:p.I313V,Slc4a1ap:uc008wyq.1:exon3:c.A937G:p.I313V	exonic	ENSMUSG00000029141	NA	nonsynonymous SNV	ENSMUSG00000029141:ENSMUST00000114533:exon3:c.A937G:p.I313V,ENSMUSG00000029141:ENSMUST00000117262:exon3:c.A937G:p.I313V,ENSMUSG00000029141:ENSMUST00000117319:exon3:c.A937G:p.I313V	5qB1	NA	NA	+	AGCGTTTTATATAAAGGATCC	chr5	31530710	TATxTAA	A	G	66_S3_L001_R1_001	64_Jiri_S1_L001_R1_001	0	NOVEL	COVERED	0.997553	0.997553	1	1	1	134	0	-0.874976	10.8026	5.78687	6.46529	0.097222	0.02	0.86979
ACR_S9_1	chr5	53282771	53282771	G	A	intergenic	Smim20,Rbpj	dist=4231;dist=273008	NA	NA	intergenic	Smim20,Rbpj	dist=4231;dist=273008	NA	NA	UTR3	ENSMUSG00000061461	ENSMUST00000121042:c.*4837G>A	NA	NA	5qC1	NA	NA	NA	AGAAAGAAATGCAAAAGCAGG	chr5	53282771	AATxCAA	G	A	66_S3_L001_R1_001	64_Jiri_S1_L001_R1_001	0	NOVEL	COVERED	0.981955	0.981955	1	1	0.999992	97	0	11.1564	16.8397	10.1673	9.09864	0.166667	0.02	0.904374
ACR_S9_1	chr5	75011553	75011553	G	C	intronic	Chic2	NA	NA	NA	intronic	Chic2	NA	NA	NA	intronic	ENSMUSG00000029229	NA	NA	NA	5qC3.3	NA	NA	-	ACTGGTTTTAGAAAAGCTGTT	chr5	75011553	TTAxAAA	G	C	66_S3_L001_R1_001	64_Jiri_S1_L001_R1_001	0	NOVEL	COVERED	0.924631	0.92664	0.997832	0.997832	0	61	0	20.7159	23.3867	8.24322	16.8276	0.244444	0.02	-0.394306
ACR_S9_1	chr5	77281022	77281022	G	T	exonic	Rest	NA	nonsynonymous SNV	Rest:NM_011263:exon4:c.G1287T:p.E429D	exonic	Rest	NA	nonsynonymous SNV	Rest:uc008xvz.2:exon4:c.G1287T:p.E429D,Rest:uc008xwa.2:exon4:c.G1287T:p.E429D	exonic	ENSMUSG00000029249	NA	nonsynonymous SNV	ENSMUSG00000029249:ENSMUST00000080359:exon4:c.G1287T:p.E429D,ENSMUSG00000029249:ENSMUST00000113449:exon4:c.G1287T:p.E429D	5qC3.3	NA	NA	+	AAAAGAGAGAGGCTGACCTGC	chr5	77281022	AGAxGCT	G	T	66_S3_L001_R1_001	64_Jiri_S1_L001_R1_001	0	NOVEL	COVERED	1	1	1	1	1	282	0	-16.6486	14.6384	3.45362	11.339	0.063291	0.02	3.10821
ACR_S9_1	chr5	90365926	90365926	G	C	exonic	Ankrd17	NA	nonsynonymous SNV	Ankrd17:NM_030886:exon1:c.C122G:p.S41C,Ankrd17:NM_198010:exon1:c.C122G:p.S41C	exonic	Ankrd17	NA	nonsynonymous SNV	Ankrd17:uc029vje.1:exon1:c.C122G:p.S41C,Ankrd17:uc029vjf.1:exon1:c.C122G:p.S41C,Ankrd17:uc029vjg.1:exon1:c.C122G:p.S41C	exonic	ENSMUSG00000055204	NA	nonsynonymous SNV	ENSMUSG00000055204:ENSMUST00000014421:exon1:c.C122G:p.S41C,ENSMUSG00000055204:ENSMUST00000081914:exon1:c.C122G:p.S41C,ENSMUSG00000055204:ENSMUST00000168058:exon1:c.C122G:p.S41C	5qE1	NA	NA	-	ACGAGGAGAAGAGGCCGGGCG	chr5	90365926	GAAxAGG	G	C	66_S3_L001_R1_001	64_Jiri_S1_L001_R1_001	0	NOVEL	UNCOVERED	0.099257	0.099721	0.995343	0.995343	0	24	0	6.6264	6.84561	0	7.0353	0.333333	0.02	-0.087576
ACR_S9_1	chr5	92652855	92652855	A	C	intronic	Ccdc158	NA	NA	NA	UTR3	Ccdc158	uc008yds.1:c.*1279T>G	NA	NA	UTR3	ENSMUSG00000050050	ENSMUST00000151180:c.*1279T>G,ENSMUST00000150359:c.*1279T>G	NA	NA	5qE2	NA	NA	-	CACACTCAGGAGGGAGTAGGA	chr5	92652855	AGGxGGG	A	C	66_S3_L001_R1_001	70_S7_L001_R1_001	0	NOVEL	COVERED	0.999956	0.999956	1	1	1	171	0	-13.0788	7.00659	6.71809	1.01363	0.052632	0.02	0.640986
ACR_S9_1	chr5	110655902	110655902	C	G	exonic	Ddx51	NA	nonsynonymous SNV	Ddx51:NM_027156:exon8:c.C1163G:p.A388G	exonic	Ddx51	NA	nonsynonymous SNV	Ddx51:uc008yre.2:exon8:c.C1163G:p.A388G	exonic	ENSMUSG00000029504	NA	nonsynonymous SNV	ENSMUSG00000029504:ENSMUST00000031478:exon8:c.C1163G:p.A388G	5qF	NA	NA	+	CTGACTGCTGCCAGGTACCCT	chr5	110655902	CTGxCAG	C	G	66_S3_L001_R1_001	64_Jiri_S1_L001_R1_001	0	NOVEL	COVERED	0.48826	0.490544	0.995343	0.995343	0	37	0	11.8445	12.7085	3.79163	9.18506	0.285714	0.02	-0.200527
ACR_S9_1	chr5	114883529	114883529	G	C	UTR3	4930519G04Rik	NM_026263:c.*664G>C	NA	NA	UTR3	4930519G04Rik	uc008zcs.1:c.*664G>C	NA	NA	UTR3	ENSMUSG00000029564	ENSMUST00000031547:c.*664G>C	NA	NA	5qF	NA	NA	+	TTGCCCTGGAGTCCAGGGTCT	chr5	114883529	GGAxTCC	G	C	66_S3_L001_R1_001	64_Jiri_S1_L001_R1_001	0	NOVEL	COVERED	0.888873	0.888875	0.999997	0.999997	0.999667	72	0	3.42	8.85985	5.16971	7.83014	0.125	0.02	-0.35796
ACR_S9_1	chr5	121785439	121785439	T	C	intronic	Atxn2	NA	NA	NA	intronic	Atxn2	NA	NA	NA	intronic	ENSMUSG00000042605	NA	NA	NA	5qF	NA	NA	+	TTTCCTGTTGTAATCCATGCA	chr5	121785439	TTGxAAT	T	C	66_S3_L001_R1_001	64_Jiri_S1_L001_R1_001	0	NOVEL	COVERED	0.999678	0.999678	1	1	1	169	0	9.39993	20.2678	19.064	3.45009	0.13253	0.02	0.746469
ACR_S9_1	chr5	123371589	123371589	T	G	UTR3	Bcl7a	NM_029850:c.*500T>G	NA	NA	UTR3	Bcl7a	uc008zno.2:c.*500T>G	NA	NA	UTR3	ENSMUSG00000029438	ENSMUST00000120593:c.*500T>G,ENSMUST00000031391:c.*500T>G	NA	NA	5qF	NA	NA	+	AAGTGCCCACTTGTTTTGGTT	chr5	123371589	CACxTGT	T	G	66_S3_L001_R1_001	64_Jiri_S1_L001_R1_001	0	NOVEL	COVERED	0.999804	0.999804	1	1	1	188	0	11.5464	19.4268	2.30225	18.3339	0.164384	0.02	0.546889
ACR_S9_1	chr5	129789180	129789180	T	C	exonic	Cct6a	NA	unknown	UNKNOWN	exonic	Cct6a	NA	nonsynonymous SNV	Cct6a:uc029voy.2:exon3:c.T329C:p.I110T	exonic	ENSMUSG00000029447	NA	nonsynonymous SNV	ENSMUSG00000029447:ENSMUST00000031402:exon3:c.T329C:p.I110T	5qG1.3	NA	NA	+	GACCTGTACATTTCTGAAGTA	chr5	129789180	ACAxTTC	T	C	66_S3_L001_R1_001	64_Jiri_S1_L001_R1_001	0	NOVEL	COVERED	0.987943	0.987943	1	1	1	122	0	4.71049	12.3918	1.26078	13.0335	0.125	0.02	1.07168
ACR_S9_1	chr5	137957486	137957486	A	C	exonic	Gjc3	NA	nonsynonymous SNV	Gjc3:NM_080450:exon2:c.T536G:p.F179C	exonic	Gjc3	NA	nonsynonymous SNV	Gjc3:uc009aeg.1:exon2:c.T536G:p.F179C	exonic	ENSMUSG00000056966	NA	nonsynonymous SNV	ENSMUSG00000056966:ENSMUST00000077119:exon2:c.T536G:p.F179C	5qG2	NA	NA	-	ACGACATATAAAAGTGCTGGA	chr5	137957486	ATAxAAG	A	C	66_S3_L001_R1_001	64_Jiri_S1_L001_R1_001	0	NOVEL	COVERED	0.998867	0.998867	1	1	0.999995	122	0	37.4895	41.336	17.932	25.3575	0.263158	0.02	0.923142
ACR_S9_1	chr5	139186492	139186492	A	T	UTR3	Heatr2	NM_001081265:c.*846A>T	NA	NA	UTR3	Heatr2	uc009afz.1:c.*846A>T,uc012efq.1:c.*846A>T	NA	NA	UTR3	ENSMUSG00000025857	ENSMUST00000026975:c.*846A>T	NA	NA	5qG2	NA	NA	+	ATGGAATTAAATTATTTATTA	chr5	139186492	TAAxTTA	A	T	66_S3_L001_R1_001	64_Jiri_S1_L001_R1_001	0	NOVEL	COVERED	0.693584	0.693668	0.999879	0.999879	0.986224	52	0	6.8558	8.9643	4.9494	6.79318	0.2	0.02	-0.262698
ACR_S9_1	chr5	142817341	142817341	G	C	UTR5	Tnrc18	NM_001122730:c.-2140C>G,NM_178242:c.-2140C>G	NA	NA	UTR5	Tnrc18	uc033inn.1:c.-2140C>G,uc009ajg.1:c.-2140C>G	NA	NA	UTR5	ENSMUSG00000039477	ENSMUST00000151477:c.-2140C>G,ENSMUST00000036253:c.-2140C>G	NA	NA	5qG2	NA	NA	-	TCCTGGCGCGGCTAGGCGCCC	chr5	142817341	GCGxCTA	G	C	66_S3_L001_R1_001	64_Jiri_S1_L001_R1_001	0	NOVEL	COVERED	1	1	1	1	1	534	0	61.8465	82.7928	52.1773	35.072	0.193277	0.02	5.4457
ACR_S9_1	chr5	146952012	146952012	G	C	UTR3	Mtif3	NM_001256101:c.*3582C>G,NM_001256102:c.*3582C>G,NM_001256100:c.*3582C>G,NM_029581:c.*3582C>G	NA	NA	UTR3	Mtif3	uc009anq.2:c.*3582C>G,uc009anr.2:c.*3582C>G,uc009ans.2:c.*3582C>G,uc009anp.2:c.*3582C>G	NA	NA	UTR3	ENSMUSG00000016510	ENSMUST00000066675:c.*3582C>G	NA	NA	5qG3	NA	NA	-	GCTAAGATCAGGATCCCGAGG	chr5	146952012	TCAxGAT	G	C	66_S3_L001_R1_001	64_Jiri_S1_L001_R1_001	0	NOVEL	COVERED	0.69366	0.693668	0.999988	0.999988	0.996292	57	0	11.2867	12.8318	10.003	2.60635	0.25	0.02	-0.261202
ACR_S9_1	chr5	147527091	147527091	C	G	intronic	Pan3	NA	NA	NA	intronic	Pan3	NA	NA	NA	intronic	ENSMUSG00000029647	NA	NA	NA	5qG3	NA	NA	+	CTGTGTGGAGCCAGACTTGTG	chr5	147527091	GAGxCAG	C	G	66_S3_L001_R1_001	64_Jiri_S1_L001_R1_001	0	NOVEL	COVERED	0.99994	0.99994	1	1	1	173	0	32.9445	40.57	18.8501	25.5119	0.206186	0.02	0.653697
ACR_S9_1	chr6	3968229	3968229	G	C	intronic	Tfpi2	NA	NA	NA	intronic	Tfpi2	NA	NA	NA	intronic	ENSMUSG00000029664	NA	NA	NA	6qA1	NA	NA	-	GGGATCCTGGGCAGATACCTT	chr6	3968229	TGGxCAG	G	C	66_S3_L001_R1_001	64_Jiri_S1_L001_R1_001	0	NOVEL	COVERED	0.739567	0.739671	0.999859	0.999859	0	50	0	2.7318	7.08692	7.87083	1.40835	0.125	0.02	-0.279477
ACR_S9_1	chr6	4905644	4905644	T	G	exonic	Ppp1r9a	NA	nonsynonymous SNV	Ppp1r9a:NM_181595:exon2:c.T198G:p.I66M	exonic	Ppp1r9a	NA	nonsynonymous SNV	Ppp1r9a:uc009avx.1:exon2:c.T198G:p.I66M,Ppp1r9a:uc009avy.1:exon2:c.T198G:p.I66M,Ppp1r9a:uc009awa.1:exon2:c.T198G:p.I66M	exonic	ENSMUSG00000032827	NA	nonsynonymous SNV	ENSMUSG00000032827:ENSMUST00000177153:exon1:c.T198G:p.I66M,ENSMUSG00000032827:ENSMUST00000177456:exon1:c.T198G:p.I66M,ENSMUSG00000032827:ENSMUST00000035813:exon2:c.T198G:p.I66M,ENSMUSG00000032827:ENSMUST00000168998:exon2:c.T198G:p.I66M,ENSMUSG00000032827:ENSMUST00000175889:exon2:c.T198G:p.I66M,ENSMUSG00000032827:ENSMUST00000175962:exon2:c.T198G:p.I66M,ENSMUSG00000032827:ENSMUST00000176263:exon2:c…	6qA1	NA	NA	+	TCAACAGAATTAAAAATCTAT	chr6	4905644	AATxAAA	T	G	66_S3_L001_R1_001	64_Jiri_S1_L001_R1_001	0	NOVEL	COVERED	0.999317	0.999317	1	1	1	136	0	11.6378	21.0566	3.43446	20.1751	0.142857	0.02	0.906066
ACR_S9_1	chr6	22215505	22215505	G	T	intronic	Cped1	NA	NA	NA	intronic	Cped1	NA	NA	NA	intronic	ENSMUSG00000062980	NA	NA	NA	6qA3.1	NA	NA	+	TTTTCATTTTGATACAGGATT	chr6	22215505	TTTxATA	G	T	66_S3_L001_R1_001	E210_S1	0	NOVEL	COVERED	0.998866	0.998867	0.999999	0.999999	0.999855	113	0	-3.55394	7.71677	9.72729	0	0.118421	0.02	0.549553
ACR_S9_1	chr6	23969369	23969369	A	G	exonic	Tas2r118	NA	nonsynonymous SNV	Tas2r118:NM_207022:exon1:c.T692C:p.L231P	exonic	Tas2r118	NA	nonsynonymous SNV	Tas2r118:uc009bbn.1:exon1:c.T692C:p.L231P	exonic	ENSMUSG00000043865	NA	nonsynonymous SNV	ENSMUSG00000043865:ENSMUST00000062463:exon1:c.T692C:p.L231P	6qA3.1	NA	NA	-	GAAGGTAGCAAGAGACTTCAG	chr6	23969369	GCAxGAG	A	G	66_S3_L001_R1_001	64_Jiri_S1_L001_R1_001	0	NOVEL	COVERED	0.999995	0.999995	1	1	1	174	0	44.4348	51.9399	46.5457	7.60231	0.227273	0.02	2.20431
ACR_S9_1	chr6	28445834	28445834	C	G	exonic	Pax4	NA	synonymous SNV	Pax4:NM_001159925:exon5:c.G387C:p.R129R,Pax4:NM_001159926:exon5:c.G387C:p.R129R,Pax4:NM_011038:exon5:c.G387C:p.R129R	exonic	Pax4	NA	synonymous SNV	Pax4:uc009bcs.2:exon5:c.G387C:p.R129R,Pax4:uc012eis.1:exon5:c.G387C:p.R129R,Pax4:uc012eit.1:exon5:c.G387C:p.R129R	exonic	ENSMUSG00000029706	NA	synonymous SNV	ENSMUSG00000029706:ENSMUST00000174194:exon4:c.G387C:p.R129R,ENSMUSG00000029706:ENSMUST00000031718:exon5:c.G387C:p.R129R,ENSMUSG00000029706:ENSMUST00000164519:exon5:c.G387C:p.R129R,ENSMUSG00000029706:ENSMUST00000171089:exon5:c.G387C:p.R129R	6qA3.3	NA	NA	-	CCTGAAGTGCCCGAAGTACTC	chr6	28445834	TGCxCGA	C	G	66_S3_L001_R1_001	64_Jiri_S1_L001_R1_001	0	NOVEL	COVERED	0.97082	0.97082	1	1	1	104	0	16.9936	20.736	7.06795	16.9556	0.226415	0.02	1.03647
ACR_S9_1	chr6	34161746	34161746	C	A	exonic	Slc35b4	NA	nonsynonymous SNV	Slc35b4:NM_021435:exon7:c.G527T:p.R176I	exonic	Slc35b4	NA	nonsynonymous SNV	Slc35b4:uc009bgx.1:exon7:c.G527T:p.R176I	exonic	ENSMUSG00000018999	NA	nonsynonymous SNV	ENSMUSG00000018999:ENSMUST00000019143:exon7:c.G527T:p.R176I	6qA3.3	NA	NA	-	GATGCCCATTCTTGCCGACAT	chr6	34161746	ATTxTTG	C	A	66_S3_L001_R1_001	64_Jiri_S1_L001_R1_001	0	NOVEL	COVERED	0.934491	0.934492	0.999999	0.999999	0.999806	81	0	-1.10793	6.55951	3.23364	3.06717	0.088889	0.02	-0.394121
ACR_S9_1	chr6	34781219	34781219	A	T	intronic	Agbl3	NA	NA	NA	intronic	Agbl3	NA	NA	NA	UTR5	ENSMUSG00000038836	ENSMUST00000135304:c.-937A>T	NA	NA	6qB1	NA	NA	+	TAAAATGCCAATTTCAGGCTT	chr6	34781219	CCAxTTT	A	T	66_S3_L001_R1_001	E210_S1	0	NOVEL	COVERED	1	1	1	1	1	337	0	-41.7696	14.3977	11.9425	2.41674	0.043651	0.02	4.95858
ACR_S9_1	chr6	34874254	34874254	G	C	UTR3	3110062M04Rik,Tmem140	NM_001135611:c.*190C>G,NM_199145:c.*190C>G;NM_197986:c.*1146G>C	NA	NA	UTR3	3110062M04Rik,Tmem140	uc009bhv.1:c.*190C>G,uc009bhw.2:c.*190C>G,uc009bhy.2:c.*190C>G,uc009bhx.2:c.*190C>G;uc009bhu.1:c.*1146G>C	NA	NA	UTR3	ENSMUSG00000046806,ENSMUSG00000057137	ENSMUST00000055097:c.*190C>G,ENSMUST00000115007:c.*190C>G,ENSMUST00000115006:c.*190C>G;ENSMUST00000074949:c.*1146G>C	NA	NA	6qB1	NA	NA	NA	ATCCCTCAGGGCCCGAGGGTG	chr6	34874254	AGGxCCC	G	C	66_S3_L001_R1_001	64_Jiri_S1_L001_R1_001	0	NOVEL	COVERED	0.948402	0.948402	1	1	0.999995	93	0	6.37786	11.8775	4.77923	6.58728	0.148936	0.02	-0.4177
ACR_S9_1	chr6	47523013	47523013	C	A	intronic	Cul1	NA	NA	NA	intronic	Cul1	NA	NA	NA	intronic	ENSMUSG00000029686	NA	NA	NA	6qB2.3	NA	NA	+	TGAGGCTGGGCCTCTGGGACA	chr6	47523013	GGGxCTC	C	A	66_S3_L001_R1_001	64_Jiri_S1_L001_R1_001	0	NOVEL	COVERED	0.997898	0.997898	1	1	1	128	0	4.42511	14.3735	12.3331	2.24768	0.125	0.02	0.76391
ACR_S9_1	chr6	48498364	48498364	G	C	exonic	Sspo	NA	nonsynonymous SNV	Sspo:NM_173428:exon100:c.G15092C:p.C5031S	exonic	Sspo	NA	nonsynonymous SNV	Sspo:uc009bul.1:exon64:c.G9122C:p.C3041S,Sspo:uc029vvf.1:exon100:c.G15092C:p.C5031S	exonic	ENSMUSG00000029797	NA	nonsynonymous SNV	ENSMUSG00000029797:ENSMUST00000043676:exon97:c.G14663C:p.C4888S,ENSMUSG00000029797:ENSMUST00000169350:exon100:c.G15092C:p.C5031S	6qB2.3	NA	NA	+	CCAGGGAGCTGTTGCCCCATT	chr6	48498364	GCTxTTG	G	C	66_S3_L001_R1_001	64_Jiri_S1_L001_R1_001	0	NOVEL	COVERED	0.877708	0.877708	1	1	0.999974	78	0	7.13972	11.5997	5.39974	8.26452	0.153846	0.02	-0.35048
ACR_S9_1	chr6	57603017	57603017	A	C	intronic	Herc6	NA	NA	NA	intronic	Herc6	NA	NA	NA	intronic	ENSMUSG00000029798	NA	NA	NA	6qB3	NA	NA	+	CCCATTAAGTATCTAGTTTTT	chr6	57603017	AGTxTCT	A	C	66_S3_L001_R1_001	64_Jiri_S1_L001_R1_001	0	NOVEL	COVERED	0.999978	0.999978	1	1	1	162	0	18.5489	29.8102	9.77717	24.3341	0.158416	0.02	2.19539
ACR_S9_1	chr6	58854922	58854922	C	T	exonic	Herc3	NA	synonymous SNV	Herc3:NM_028705:exon3:c.C276T:p.G92G	exonic	Herc3	NA	synonymous SNV	Herc3:uc009cde.1:exon3:c.C276T:p.G92G,Herc3:uc009cdf.1:exon3:c.C276T:p.G92G	exonic	ENSMUSG00000029804	NA	synonymous SNV	ENSMUSG00000029804:ENSMUST00000031823:exon3:c.C276T:p.G92G,ENSMUSG00000029804:ENSMUST00000041401:exon3:c.C276T:p.G92G	6qB3	NA	NA	+	TGGCATGTGGCGAGTCACACA	chr6	58854922	TGGxGAG	C	T	66_S3_L001_R1_001	64_Jiri_S1_L001_R1_001	0	NOVEL	COVERED	0.918159	0.918171	0.999988	0.999988	0.996292	71	0	-0.506396	6.89856	0	7.86994	0.090909	0.02	-0.38536
ACR_S9_1	chr6	80024936	80024936	A	T	intronic	Lrrtm4	NA	NA	NA	intronic	Lrrtm4	NA	NA	NA	UTR3	ENSMUSG00000052581	ENSMUST00000136421:c.*1770A>T	NA	NA	6qC3	NA	NA	+	AAAGTCTACCAAGGCTTGATG	chr6	80024936	ACCxAGG	A	T	66_S3_L001_R1_001	64_Jiri_S1_L001_R1_001	0	NOVEL	COVERED	1	1	1	1	1	2190	0	155.449	307.689	217.755	165.342	0.138728	0.02	27.6195
ACR_S9_1	chr6	96655582	96655582	A	T	UTR3	Fam19a1	NM_182808:c.*798A>T	NA	NA	UTR3	Fam19a1	uc009dae.2:c.*798A>T,uc009daf.2:c.*798A>T	NA	NA	UTR3	ENSMUSG00000059187	ENSMUST00000122120:c.*798A>T,ENSMUST00000075080:c.*798A>T	NA	NA	6qD3	NA	NA	+	AGACTCTGGCAGGATGGTAGG	chr6	96655582	GGCxGGA	A	T	66_S3_L001_R1_001	64_Jiri_S1_L001_R1_001	0	NOVEL	COVERED	1	1	1	1	1	363	0	26.4422	54.3127	33.9675	23.6087	0.13964	0.02	4.42743
ACR_S9_1	chr6	113277878	113277878	C	A	exonic	Mtmr14	NA	synonymous SNV	Mtmr14:NM_026849:exon18:c.C1696A:p.R566R	exonic	Mtmr14	NA	synonymous SNV	Mtmr14:uc009dex.2:exon18:c.C1696A:p.R566R	exonic	ENSMUSG00000030269	NA	synonymous SNV	ENSMUSG00000030269:ENSMUST00000113146:exon18:c.C1696A:p.R566R	6qE3	NA	NA	+	TATTCAGGACCGGCCTGTCCT	chr6	113277878	GACxGGC	C	A	66_S3_L001_R1_001	64_Jiri_S1_L001_R1_001	0	NOVEL	COVERED	0.800173	0.800245	0.999909	0.999909	0.989678	59	0	2.25528	7.32355	0	7.74101	0.114286	0.02	-0.305232
ACR_S9_1	chr6	117177706	117177706	C	T	UTR3	Cxcl12	NM_001012477:c.*1527C>T	NA	NA	UTR3	Cxcl12	uc009dkt.2:c.*1527C>T	NA	NA	UTR3	ENSMUSG00000061353	ENSMUST00000073043:c.*1527C>T	NA	NA	6qF1	NA	NA	+	CCACCCTTACCGGACACTGGG	chr6	117177706	TACxGGA	C	T	66_S3_L001_R1_001	64_Jiri_S1_L001_R1_001	0	NOVEL	COVERED	0.999317	0.999317	1	1	1	131	0	2.85609	14.4821	10.7619	7.66736	0.113924	0.02	0.790926
ACR_S9_1	chr6	119949170	119949170	T	C	exonic	Wnk1	NA	nonsynonymous SNV	Wnk1:NM_001185020:exon17:c.A3332G:p.D1111G,Wnk1:NM_001185021:exon18:c.A3617G:p.D1206G,Wnk1:NM_001199083:exon19:c.A4826G:p.D1609G,Wnk1:NM_001199084:exon19:c.A4853G:p.D1618G,Wnk1:NM_198703:exon19:c.A4079G:p.D1360G	exonic	Wnk1	NA	nonsynonymous SNV	Wnk1:uc012eru.1:exon17:c.A3332G:p.D1111G,Wnk1:uc009dmu.2:exon18:c.A3617G:p.D1206G,Wnk1:uc009dmt.2:exon19:c.A4079G:p.D1360G,Wnk1:uc012ers.1:exon19:c.A4853G:p.D1618G,Wnk1:uc012ert.1:exon19:c.A4826G:p.D1609G	exonic	ENSMUSG00000045962	NA	nonsynonymous SNV	ENSMUSG00000045962:ENSMUST00000088646:exon18:c.A3617G:p.D1206G,ENSMUSG00000045962:ENSMUST00000060043:exon19:c.A4079G:p.D1360G,ENSMUSG00000045962:ENSMUST00000088644:exon19:c.A4853G:p.D1618G,ENSMUSG00000045962:ENSMUST00000177761:exon19:c.A4826G:p.D1609G	6qF1	NA	NA	-	TGTGGAAATGTCATTAAGAGG	chr6	119949170	ATGxCAT	T	C	66_S3_L001_R1_001	64_Jiri_S1_L001_R1_001	0	NOVEL	COVERED	0.999962	0.999962	1	1	1	180	0	35.2499	42.8198	38.7907	14.8407	0.212121	0.02	0.72128
ACR_S9_1	chr6	121194983	121194983	G	C	UTR3	Pex26	NM_028730:c.*1368G>C	NA	NA	UTR3	Pex26	uc009dod.1:c.*1368G>C,uc009doe.1:c.*1368G>C,uc012esc.1:c.*1477G>C	NA	NA	UTR3	ENSMUSG00000067825	ENSMUST00000118234:c.*1477G>C,ENSMUST00000088561:c.*1368G>C,ENSMUST00000120066:c.*1368G>C	NA	NA	6qF1	NA	NA	+	CAGTGTTGTCGCCCAACTTGG	chr6	121194983	GTCxCCC	G	C	66_S3_L001_R1_001	64_Jiri_S1_L001_R1_001	0	NOVEL	COVERED	1	1	1	1	1	351	0	-27.1991	16.0581	2.60289	15.0676	0.05314	0.02	4.22408
ACR_S9_1	chr6	121379263	121379263	A	T	intronic	Iqsec3	NA	NA	NA	intronic	Iqsec3	NA	NA	NA	UTR3	ENSMUSG00000040797	ENSMUST00000129815:c.*2866T>A	NA	NA	6qF1	NA	NA	-	TGGGGCTGGCATAAGCCAGCC	chr6	121379263	GGCxTAA	A	T	66_S3_L001_R1_001	70_S7_L001_R1_001	0	NOVEL	COVERED	0.959859	0.959859	1	1	0.999912	87	0	-2.38854	6.57049	1.15566	8.17516	0.08	0.02	-0.437501
ACR_S9_1	chr6	122313344	122313344	G	C	exonic	M6pr	NA	nonsynonymous SNV	M6pr:NM_010749:exon3:c.G265C:p.A89P	exonic	M6pr	NA	nonsynonymous SNV	M6pr:uc009dow.1:exon3:c.G265C:p.A89P	exonic	ENSMUSG00000007458	NA	nonsynonymous SNV	ENSMUSG00000007458:ENSMUST00000007602:exon3:c.G265C:p.A89P,ENSMUSG00000007458:ENSMUST00000112610:exon4:c.G265C:p.A89P	6qF1	NA	NA	+	CTCCTCTGGAGCAGGCCTGGT	chr6	122313344	GGAxCAG	G	C	66_S3_L001_R1_001	64_Jiri_S1_L001_R1_001	0	NOVEL	COVERED	0.992094	0.992094	1	1	1	134	7	-3.76169	7.62063	4.12277	4.65643	0.079365	0.02	0.947737
ACR_S9_1	chr6	124718321	124718321	G	A	upstream;downstream	Mir141;Mir200c	NA	NA	NA	upstream;downstream	Mir141;Mir200c	NA	NA	NA	ncRNA_exonic	ENSMUSG00000065462	NA	NA	NA	6qF2	NA	NA	NA	TGGGACAGGGGCCTCCATCAT	chr6	124718321	GGGxCCT	G	A	66_S3_L001_R1_001	64_Jiri_S1_L001_R1_001	0	NOVEL	COVERED	0.996724	0.996724	1	1	1	119	0	-1.83516	9.77237	6.62222	4.61907	0.088235	0.02	0.887483
ACR_S9_1	chr6	126643208	126643208	T	C	exonic	Kcna1	NA	nonsynonymous SNV	Kcna1:NM_010595:exon2:c.A148G:p.T50A	exonic	Kcna1	NA	nonsynonymous SNV	Kcna1:uc033iva.1:exon1:c.A148G:p.T50A,Kcna1:uc009dvb.1:exon2:c.A148G:p.T50A	exonic	ENSMUSG00000047976	NA	nonsynonymous SNV	ENSMUSG00000047976:ENSMUST00000055168:exon2:c.A148G:p.T50A	6qF3	NA	NA	-	TTGAGCTGCGTTTCGAAGCGC	chr6	126643208	GCGxTTC	T	C	66_S3_L001_R1_001	70_S7_L001_R1_001	0	NOVEL	COVERED	0.93449	0.934492	0.999998	0.999998	0.999725	79	0	-0.583065	6.54491	1.52641	4.89713	0.093023	0.02	-0.402
ACR_S9_1	chr6	132980610	132980610	G	C	exonic	Tas2r109	NA	nonsynonymous SNV	Tas2r109:NM_207017:exon1:c.C356G:p.A119G	exonic	Tas2r109	NA	nonsynonymous SNV	Tas2r109:uc009ejx.1:exon1:c.C356G:p.A119G	exonic	ENSMUSG00000062528	NA	nonsynonymous SNV	ENSMUSG00000062528:ENSMUST00000067539:exon1:c.C356G:p.A119G	6qG1	NA	NA	-	AGAAAAATTGGCTATCTTGAG	chr6	132980610	TTGxCTA	G	C	66_S3_L001_R1_001	64_Jiri_S1_L001_R1_001	0	NOVEL	COVERED	1	1	1	1	1	669	0	68.3009	115.785	66.2187	64.1291	0.151589	0.02	9.17206
ACR_S9_1	chr6	136849374	136849374	A	T	UTR3	Art4	NM_026639:c.*201T>A	NA	NA	UTR3	Art4	uc009emk.1:c.*201T>A	NA	NA	UTR3	ENSMUSG00000030217	ENSMUST00000032341:c.*201T>A	NA	NA	6qG1	NA	NA	-	TGACAGCAACAGGAAAAAGTA	chr6	136849374	AACxGGA	A	T	66_S3_L001_R1_001	64_Jiri_S1_L001_R1_001	0	NOVEL	COVERED	0.995684	0.995687	0.999998	0.999998	0.999725	101	0	4.3814	11.6457	9.75917	3.65291	0.12963	0.02	1.00165
ACR_S9_1	chr6	145215521	145215521	A	G	exonic	Lyrm5	NA	synonymous SNV	Lyrm5:NM_001163628:exon3:c.A216G:p.K72K,Lyrm5:NM_133688:exon3:c.A216G:p.K72K	exonic	Lyrm5	NA	synonymous SNV	Lyrm5:uc009erf.2:exon3:c.A216G:p.K72K,Lyrm5:uc012evp.1:exon3:c.A216G:p.K72K	exonic	ENSMUSG00000040370	NA	synonymous SNV	ENSMUSG00000040370:ENSMUST00000039729:exon3:c.A216G:p.K72K,ENSMUSG00000040370:ENSMUST00000111721:exon3:c.A216G:p.K72K,ENSMUSG00000040370:ENSMUST00000111725:exon3:c.A216G:p.K72K,ENSMUSG00000040370:ENSMUST00000111726:exon3:c.A216G:p.K72K,ENSMUSG00000040370:ENSMUST00000111719:exon4:c.A216G:p.K72K,ENSMUSG00000040370:ENSMUST00000111723:exon4:c.A216G:p.K72K,ENSMUSG00000040370:ENSMUST00000111724:exon4:c…	6qG3	NA	NA	+	TCCTTAGGAAATACAGAGCTA	chr6	145215521	GAAxTAC	A	G	66_S3_L001_R1_001	E210_S1	0	NOVEL	COVERED	1	1	1	1	1	278	0	-37.1001	10.7451	12.3966	0	0.038462	0.02	4.16022
ACR_S9_1	chr6	145219660	145219660	G	C	UTR3	Kras	NM_021284:c.*948C>G	NA	NA	UTR3	Kras	uc009erh.2:c.*948C>G,uc009eri.2:c.*1069C>G	NA	NA	UTR3	ENSMUSG00000030265	ENSMUST00000032399:c.*948C>G	NA	NA	6qG3	NA	NA	-	TTCACGTAAGGCCCAACCCTG	chr6	145219660	AAGxCCC	G	C	66_S3_L001_R1_001	64_Jiri_S1_L001_R1_001	0	NOVEL	COVERED	1	1	1	1	1	1124	0	69.3835	147.869	95.5737	51.6688	0.133884	0.02	12.971
ACR_S9_1	chr6	146813260	146813260	A	T	exonic	Arntl2	NA	stopgain	Arntl2:NM_001289679:exon5:c.A430T:p.R144X,Arntl2:NM_001289680:exon5:c.A430T:p.R144X,Arntl2:NM_172309:exon5:c.A430T:p.R144X	exonic	Arntl2	NA	stopgain	Arntl2:uc009esj.2:exon5:c.A430T:p.R144X,Arntl2:uc012evr.2:exon5:c.A430T:p.R144X,Arntl2:uc012evs.2:exon5:c.A430T:p.R144X	exonic	ENSMUSG00000040187	NA	stopgain	ENSMUSG00000040187:ENSMUST00000080530:exon5:c.A430T:p.R144X,ENSMUSG00000040187:ENSMUST00000111636:exon5:c.A430T:p.R144X,ENSMUSG00000040187:ENSMUST00000111638:exon5:c.A430T:p.R144X,ENSMUSG00000040187:ENSMUST00000129788:exon5:c.A430T:p.R144X,ENSMUSG00000040187:ENSMUST00000111639:exon7:c.A430T:p.R144X	6qG3	NA	NA	+	CGAAAGAGGGAGAATTTTTTA	chr6	146813260	GGGxGAA	A	T	66_S3_L001_R1_001	64_Jiri_S1_L001_R1_001	0	NOVEL	COVERED	0.612327	0.612407	0.999869	0.999869	0.984784	48	0	12.6106	14.031	9.66839	8.4314	0.259259	0.02	-0.236685
ACR_S9_1	chr7	15949316	15949316	T	A	UTR3	Ehd2	NM_153068:c.*925A>T	NA	NA	UTR3	Ehd2	uc009fgt.1:c.*925A>T	NA	NA	UTR3	ENSMUSG00000074364	ENSMUST00000098799:c.*925A>T	NA	NA	7qA2	NA	NA	-	ATACTTTGGTTCCCAACCCCA	chr7	15949316	GGTxCCC	T	A	66_S3_L001_R1_001	64_Jiri_S1_L001_R1_001	0	NOVEL	COVERED	1	1	1	1	1	396	0	-25.1307	14.0136	5.21524	9.3026	0.057592	0.02	4.08352
ACR_S9_1	chr7	15949329	15949329	C	T	UTR3	Ehd2	NM_153068:c.*912G>A	NA	NA	UTR3	Ehd2	uc009fgt.1:c.*912G>A	NA	NA	UTR3	ENSMUSG00000074364	ENSMUST00000098799:c.*912G>A	NA	NA	7qA2	NA	NA	-	CAACCCCACACGCTGGGGAAA	chr7	15949329	ACAxGCT	C	T	66_S3_L001_R1_001	64_Jiri_S1_L001_R1_001	0	NOVEL	COVERED	1	1	1	1	1	366	0	-29.4731	10.7337	3.53169	10.8131	0.043956	0.02	2.96508
ACR_S9_1	chr7	20049539	20049539	C	A	exonic	Nlrp9b	NA	nonsynonymous SNV	Nlrp9b:NM_194058:exon9:c.C2806A:p.L936M	exonic	Nlrp9b	NA	nonsynonymous SNV	Nlrp9b:uc012fbn.1:exon6:c.C2344A:p.L782M,Nlrp9b:uc012fbm.1:exon7:c.C1315A:p.L439M,Nlrp9b:uc009fnt.1:exon9:c.C2806A:p.L936M	exonic	ENSMUSG00000060508	NA	nonsynonymous SNV	ENSMUSG00000060508:ENSMUST00000117909:exon7:c.C1315A:p.L439M,ENSMUSG00000060508:ENSMUST00000073151:exon9:c.C2806A:p.L936M	7qA3	NA	NA	+	CCACTCTGGGCTGGTGGTGCT	chr7	20049539	GGGxTGG	C	A	66_S3_L001_R1_001	64_Jiri_S1_L001_R1_001	0	NOVEL	COVERED	0.835713	0.835716	0.999997	0.999997	0.998875	65	0	1.47827	7.11192	3.63096	5.34659	0.108108	0.02	-0.324399
ACR_S9_1	chr7	25062912	25062912	G	C	exonic	Grik5	NA	nonsynonymous SNV	Grik5:NM_008168:exon6:c.C653G:p.A218G	exonic	Grik5	NA	nonsynonymous SNV	Grik5:uc009frh.2:exon6:c.C653G:p.A218G,Grik5:uc009fri.2:exon6:c.C80G:p.A27G	exonic	ENSMUSG00000003378	NA	nonsynonymous SNV	ENSMUSG00000003378:ENSMUST00000003468:exon6:c.C653G:p.A218G	7qA3	NA	NA	-	GGACGCATTGGCATCAATGAT	chr7	25062912	TTGxCAT	G	C	66_S3_L001_R1_001	64_Jiri_S1_L001_R1_001	0	NOVEL	COVERED	0.963774	0.963774	1	1	1	118	0	22.4803	25.7466	19.6364	15.0821	0.235294	0.02	1.15026
ACR_S9_1	chr7	25080945	25080945	C	G	exonic	Zfp574	NA	nonsynonymous SNV	Zfp574:NM_001168506:exon2:c.C1391G:p.A464G,Zfp574:NM_175477:exon2:c.C1391G:p.A464G	exonic	Zfp574	NA	nonsynonymous SNV	Zfp574:uc033ixp.1:exon1:c.C1391G:p.A464G,Zfp574:uc009frj.2:exon2:c.C1391G:p.A464G,Zfp574:uc009frk.2:exon2:c.C1391G:p.A464G	exonic	ENSMUSG00000045252	NA	nonsynonymous SNV	ENSMUSG00000045252:ENSMUST00000053410:exon2:c.C1391G:p.A464G,ENSMUSG00000045252:ENSMUST00000179556:exon2:c.C1391G:p.A464G	7qA3	NA	NA	+	GCCGAGCCTGCAGCTCCAGGC	chr7	25080945	CTGxAGC	C	G	66_S3_L001_R1_001	64_Jiri_S1_L001_R1_001	0	NOVEL	COVERED	0.760885	0.760887	0.999998	0.999998	0.999763	67	0	2.78265	7.17927	3.98249	3.34885	0.125	0.02	-0.289302
ACR_S9_1	chr7	25080950	25080950	C	G	exonic	Zfp574	NA	nonsynonymous SNV	Zfp574:NM_001168506:exon2:c.C1396G:p.P466A,Zfp574:NM_175477:exon2:c.C1396G:p.P466A	exonic	Zfp574	NA	nonsynonymous SNV	Zfp574:uc033ixp.1:exon1:c.C1396G:p.P466A,Zfp574:uc009frj.2:exon2:c.C1396G:p.P466A,Zfp574:uc009frk.2:exon2:c.C1396G:p.P466A	exonic	ENSMUSG00000045252	NA	nonsynonymous SNV	ENSMUSG00000045252:ENSMUST00000053410:exon2:c.C1396G:p.P466A,ENSMUSG00000045252:ENSMUST00000179556:exon2:c.C1396G:p.P466A	7qA3	NA	NA	+	GCCTGCAGCTCCAGGCTCTTA	chr7	25080950	GCTxCAG	C	G	66_S3_L001_R1_001	70_S7_L001_R1_001	0	NOVEL	COVERED	0.739671	0.739671	1	1	0.999992	73	0	2.98317	7.13827	4.08225	3.15012	0.129032	0.02	-0.280528
ACR_S9_1	chr7	26385564	26385564	C	T	exonic	Nlrp9c	NA	nonsynonymous SNV	Nlrp9c:NM_001042612:exon2:c.G589A:p.E197K	exonic	Nlrp9c	NA	nonsynonymous SNV	Nlrp9c:uc009fuj.1:exon2:c.G589A:p.E197K,Nlrp9c:uc009fuk.1:exon2:c.G292A:p.E98K,Nlrp9c:uc012fgb.2:exon2:c.G589A:p.E197K	exonic	ENSMUSG00000040614	NA	nonsynonymous SNV	ENSMUSG00000040614:ENSMUST00000041845:exon2:c.G589A:p.E197K,ENSMUSG00000040614:ENSMUST00000085944:exon2:c.G589A:p.E197K	7qA3	NA	NA	-	GAGATAAGCTCAGCTAAGCTT	chr7	26385564	GCTxAGC	C	T	66_S3_L001_R1_001	70_S7_L001_R1_001	0	NOVEL	COVERED	0.99994	0.99994	1	1	1	225	0	-13.3741	6.98388	0	8.3953	0.052083	0.02	0.650585
ACR_S9_1	chr7	26557542	26557542	T	C	exonic	Nlrp9a	NA	nonsynonymous SNV	Nlrp9a:NM_001048219:exon3:c.T584C:p.L195S,Nlrp9a:NM_001048220:exon3:c.T584C:p.L195S	exonic	Nlrp9a	NA	nonsynonymous SNV	Nlrp9a:uc012fgd.1:exon2:c.T317C:p.L106S,Nlrp9a:uc012fge.1:exon2:c.T584C:p.L195S,Nlrp9a:uc009fuo.1:exon3:c.T584C:p.L195S,Nlrp9a:uc009fup.1:exon3:c.T584C:p.L195S	exonic	ENSMUSG00000054102	NA	nonsynonymous SNV	ENSMUSG00000054102:ENSMUST00000117252:exon2:c.T584C:p.L195S,ENSMUSG00000054102:ENSMUST00000122040:exon2:c.T584C:p.L195S,ENSMUSG00000054102:ENSMUST00000153452:exon2:c.T317C:p.L106S,ENSMUSG00000054102:ENSMUST00000071780:exon3:c.T584C:p.L195S,ENSMUSG00000054102:ENSMUST00000108387:exon3:c.T584C:p.L195S	7qA3	NA	NA	+	GAGTTAAGCTTAGCTGAGCTT	chr7	26557542	GCTxAGC	T	C	66_S3_L001_R1_001	70_S7_L001_R1_001	0	NOVEL	COVERED	1	1	1	1	1	279	0	-19.342	11.9161	2.832	9.07779	0.053691	0.02	3.16942
ACR_S9_1	chr7	27133507	27133507	T	A	UTR3	Cyp2f2	NM_007817:c.*110T>A	NA	NA	UTR3	Cyp2f2	uc009fuy.1:c.*110T>A	NA	NA	UTR3	ENSMUSG00000052974	ENSMUST00000003100:c.*110T>A	NA	NA	7qA3	NA	NA	+	CTGCCACGTATCAGTACTTTA	chr7	27133507	GTAxCAG	T	A	66_S3_L001_R1_001	64_Jiri_S1_L001_R1_001	0	NOVEL	COVERED	0.992094	0.992094	1	1	1	122	0	50.649	51.7925	20.9636	45.5224	0.354839	0.02	1.04536
ACR_S9_1	chr7	28983359	28983359	C	G	intronic	Map4k1	NA	NA	NA	intronic	Map4k1	NA	NA	NA	intronic	ENSMUSG00000037337	NA	NA	NA	7qB1	NA	NA	+	CCGCTTGTAGCCCACCTTCGC	chr7	28983359	TAGxCCA	C	G	66_S3_L001_R1_001	64_Jiri_S1_L001_R1_001	0	NOVEL	COVERED	0.941741	0.941741	1	1	1	121	0	12.4501	16.6371	14.2035	4.65037	0.191489	0.02	-0.411898
ACR_S9_1	chr7	29778139	29778139	T	C	UTR3	Zfp84	NM_023750:c.*575T>C	NA	NA	UTR3	Zfp84	uc009gbz.1:c.*575T>C	NA	NA	UTR3	ENSMUSG00000046185	ENSMUST00000032802:c.*575T>C	NA	NA	7qB1	NA	NA	+	GGAGGATGGTTATTTTGGGGA	chr7	29778139	GGTxATT	T	C	66_S3_L001_R1_001	64_Jiri_S1_L001_R1_001	0	NOVEL	COVERED	1	1	1	1	1	338	0	75.1008	83.025	33.5771	61.0742	0.261438	0.02	3.43471
ACR_S9_1	chr7	30318025	30318025	C	G	exonic	Syne4	NA	nonsynonymous SNV	Syne4:NM_001290565:exon5:c.C664G:p.R222G,Syne4:NM_153577:exon6:c.C913G:p.R305G	exonic	Syne4	NA	nonsynonymous SNV	Syne4:uc009gec.1:exon6:c.C913G:p.R305G	exonic	ENSMUSG00000019737	NA	nonsynonymous SNV	ENSMUSG00000019737:ENSMUST00000176304:exon5:c.C664G:p.R222G,ENSMUSG00000019737:ENSMUST00000054594:exon6:c.C913G:p.R305G	7qB1	NA	NA	+	CCATCGAAGGCGGCTCCGGAA	chr7	30318025	AGGxGGC	C	G	66_S3_L001_R1_001	64_Jiri_S1_L001_R1_001	0	NOVEL	COVERED	0.48826	0.490544	0.995343	0.995343	0	37	0	11.9527	12.8118	4.40123	8.00732	0.285714	0.02	-0.201386
ACR_S9_1	chr7	30426007	30426007	C	G	exonic	Nfkbid	NA	nonsynonymous SNV	Nfkbid:NM_172142:exon7:c.C485G:p.A162G	exonic	Nfkbid	NA	nonsynonymous SNV	Nfkbid:uc009gej.1:exon7:c.C485G:p.A162G,Nfkbid:uc009gei.1:exon8:c.C485G:p.A162G	exonic	ENSMUSG00000036931	NA	nonsynonymous SNV	ENSMUSG00000036931:ENSMUST00000046177:exon7:c.C485G:p.A162G,ENSMUSG00000036931:ENSMUST00000108175:exon8:c.C485G:p.A162G,ENSMUSG00000036931:ENSMUST00000108176:exon8:c.C485G:p.A162G	7qB1	NA	NA	+	GATCTGGAAGCCAGAGACTTC	chr7	30426007	AAGxCAG	C	G	66_S3_L001_R1_001	64_Jiri_S1_L001_R1_001	0	NOVEL	COVERED	0.97082	0.97082	1	1	0.999995	98	0	-0.2181	8.50963	7.16561	1.16898	0.09434	0.02	1.03615
ACR_S9_1	chr7	30590670	30590670	G	C	exonic	Zbtb32	NA	nonsynonymous SNV	Zbtb32:NM_021397:exon4:c.C918G:p.S306R	exonic	Zbtb32	NA	nonsynonymous SNV	Zbtb32:uc009gfh.1:exon4:c.C918G:p.S306R	exonic	ENSMUSG00000006310	NA	nonsynonymous SNV	ENSMUSG00000006310:ENSMUST00000108151:exon4:c.C918G:p.S306R	7qB1	NA	NA	-	TCTGCCAAGGGCTGAGGGTTT	chr7	30590670	AGGxCTG	G	C	66_S3_L001_R1_001	64_Jiri_S1_L001_R1_001	0	NOVEL	COVERED	0.999881	0.999881	1	1	1	235	0	26.0354	33.9748	29.334	11.4359	0.191011	0.02	0.792133
ACR_S9_1	chr7	43452893	43452893	T	G	exonic	Etfb	NA	nonsynonymous SNV	Etfb:NM_026695:exon3:c.T311G:p.V104G	exonic	Etfb	NA	nonsynonymous SNV	Etfb:uc009gmt.2:exon3:c.T311G:p.V104G	exonic	ENSMUSG00000004610	NA	nonsynonymous SNV	ENSMUSG00000004610:ENSMUST00000004729:exon3:c.T311G:p.V104G	7qB3	NA	NA	+	CCCCTGCAGGTGGCCCGGGTC	chr7	43452893	AGGxGGC	T	G	66_S3_L001_R1_001	64_Jiri_S1_L001_R1_001	0	NOVEL	COVERED	0.760886	0.760887	0.999999	0.999999	0.999855	69	0	3.08434	7.47856	8.01624	0	0.125	0.02	-0.28909
ACR_S9_1	chr7	44056623	44056623	A	C	exonic	Klk1b27	NA	nonsynonymous SNV	Klk1b27:NM_020268:exon5:c.A749C:p.K250T	exonic	Klk1b27	NA	nonsynonymous SNV	Klk1b27:uc009gog.1:exon5:c.A749C:p.K250T	exonic	ENSMUSG00000063177	NA	nonsynonymous SNV	ENSMUSG00000063177:ENSMUST00000079859:exon5:c.A749C:p.K250T	7qB3	NA	NA	+	AAACTTATTAAGTTTACCTCC	chr7	44056623	TTAxGTT	A	C	66_S3_L001_R1_001	64_Jiri_S1_L001_R1_001	0	NOVEL	COVERED	1	1	1	1	1	292	0	39.0873	51.2708	30.4423	31.8573	0.20915	0.02	2.7661
ACR_S9_1	chr7	44733967	44733967	T	C	exonic	Zfp473	NA	nonsynonymous SNV	Zfp473:NM_001289836:exon5:c.A941G:p.K314R,Zfp473:NM_001289837:exon5:c.A941G:p.K314R,Zfp473:NM_001289838:exon5:c.A938G:p.K313R,Zfp473:NM_001289839:exon5:c.A938G:p.K313R,Zfp473:NM_178734:exon5:c.A941G:p.K314R	exonic	Zfp473	NA	nonsynonymous SNV	Zfp473:uc009gqn.2:exon5:c.A941G:p.K314R,Zfp473:uc009gqo.2:exon5:c.A938G:p.K313R,Zfp473:uc009gqp.2:exon5:c.A941G:p.K314R,Zfp473:uc009gqq.2:exon5:c.A938G:p.K313R,Zfp473:uc033izc.1:exon5:c.A941G:p.K314R	exonic	ENSMUSG00000048012	NA	nonsynonymous SNV	ENSMUSG00000048012:ENSMUST00000060270:exon5:c.A941G:p.K314R,ENSMUSG00000048012:ENSMUST00000118162:exon5:c.A938G:p.K313R,ENSMUSG00000048012:ENSMUST00000120074:exon5:c.A941G:p.K314R,ENSMUSG00000048012:ENSMUST00000120798:exon5:c.A938G:p.K313R	7qB3	NA	NA	-	CAGCCGCTGCTTTCCTGGCTC	chr7	44733967	TGCxTTC	T	C	66_S3_L001_R1_001	64_Jiri_S1_L001_R1_001	0	NOVEL	COVERED	0.353915	0.353947	0.999909	0.999909	0.989678	43	0	7.2924	8.56957	1.66777	7.14389	0.222222	0.02	-0.16646
ACR_S9_1	chr7	44960760	44960760	G	A	exonic	Cpt1c	NA	stopgain	Cpt1c:NM_001252470:exon16:c.C2011T:p.Q671X,Cpt1c:NM_153679:exon16:c.C2011T:p.Q671X	exonic	Cpt1c	NA	stopgain	Cpt1c:uc009gsb.2:exon16:c.C2011T:p.Q671X,Cpt1c:uc009gsc.2:exon16:c.C2011T:p.Q671X	exonic	ENSMUSG00000007783	NA	stopgain	ENSMUSG00000007783:ENSMUST00000063761:exon16:c.C2011T:p.Q671X	7qB3	NA	NA	-	TTCCTGACCTGGGTCAGGAAG	chr7	44960760	CCTxGGT	G	A	66_S3_L001_R1_001	70_S7_L001_R1_001	0	NOVEL	COVERED	0.641347	0.641347	1	1	0.999992	69	0	4.40181	7.36885	7.60054	0	0.153846	0.02	-0.245055
ACR_S9_1	chr7	45304688	45304688	A	C	exonic	Trpm4	NA	synonymous SNV	Trpm4:NM_175130:exon24:c.T3558G:p.T1186T	exonic	Trpm4	NA	synonymous SNV	Trpm4:uc009gun.2:exon22:c.T3114G:p.T1038T,Trpm4:uc009gup.2:exon24:c.T3558G:p.T1186T	exonic	ENSMUSG00000038260	NA	synonymous SNV	ENSMUSG00000038260:ENSMUST00000042194:exon24:c.T3558G:p.T1186T	7qB3	NA	NA	-	CAGCCATCCAAGTCAGGACTC	chr7	45304688	CCAxGTC	A	C	66_S3_L001_R1_001	64_Jiri_S1_L001_R1_001	0	NOVEL	COVERED	0.976862	0.976865	0.999997	0.999997	0.999646	85	0	1.88549	9.37414	4.48614	4.44656	0.127273	0.02	0.921392
ACR_S9_1	chr7	56718442	56718442	G	T	intergenic	Oca2,Gabrg3	dist=181925;dist=5800	NA	NA	intergenic	Oca2,Gabrg3	dist=181925;dist=5800	NA	NA	UTR3	ENSMUSG00000055026	ENSMUST00000068911:c.*5971C>A	NA	NA	7qB5	NA	NA	NA	TTTTTTTTTTGTTCTTTATTT	chr7	56718442	TTTxTTC	G	T	66_S3_L001_R1_001	E210_S1	0	NOVEL	COVERED	0.976865	0.976865	1	1	1	117	0	2.21437	8.20441	9.04134	0	0.153846	0.02	0.737381
ACR_S9_1	chr7	66646216	66646216	T	C	UTR3	Asb7	NM_080443:c.*1570A>G	NA	NA	UTR3	Asb7	uc009hhm.3:c.*1570A>G,uc012fmt.2:c.*1570A>G,uc009hhn.3:c.*1570A>G	NA	NA	UTR3	ENSMUSG00000030509	ENSMUST00000131320:c.*2346A>G,ENSMUST00000124899:c.*1570A>G	NA	NA	7qC	NA	NA	-	TGCTTAATTATGTTAGGAGGG	chr7	66646216	TTAxGTT	T	C	66_S3_L001_R1_001	64_Jiri_S1_L001_R1_001	0	NOVEL	COVERED	0.851984	0.851984	1	1	1	99	0	25.708	26.2957	19.1241	8.91435	0.368421	0.02	-0.330783
ACR_S9_1	chr7	83775335	83775335	A	C	downstream	1700026D08Rik	NA	NA	NA	downstream	1700026D08Rik	NA	NA	NA	UTR3	ENSMUSG00000011154	ENSMUST00000119134:c.*851T>G	NA	NA	7qD3	NA	NA	-	GGGTCTAGTAAGGCAGTCAGG	chr7	83775335	GTAxGGC	A	C	66_S3_L001_R1_001	64_Jiri_S1_L001_R1_001	0	NOVEL	COVERED	0.999768	0.999768	1	1	1	217	0	-3.23811	11.3578	11.7051	0	0.091954	0.02	0.632524
ACR_S9_1	chr7	92859260	92859260	C	T	exonic	Ddias	NA	synonymous SNV	Ddias:NM_001080995:exon7:c.G1446A:p.G482G	exonic	4632434I11Rik	NA	synonymous SNV	4632434I11Rik:uc009iii.1:exon6:c.G1446A:p.G482G,4632434I11Rik:uc009iih.1:exon7:c.G1446A:p.G482G	exonic	ENSMUSG00000030641	NA	synonymous SNV	ENSMUSG00000030641:ENSMUST00000032877:exon6:c.G1446A:p.G482G	7qE1	NA	NA	-	GGGCCTCTTTCCCAGAGTCTT	chr7	92859260	TTTxCCA	C	T	66_S3_L001_R1_001	64_Jiri_S1_L001_R1_001	0	NOVEL	COVERED	0.934492	0.934492	1	1	1	102	0	-1.1925	6.46165	7.40107	0	0.088889	0.02	-0.402533
ACR_S9_1	chr7	97972985	97972985	C	T	exonic	Gdpd4	NA	stopgain	Gdpd4:NM_177696:exon8:c.C670T:p.Q224X	exonic	Gdpd4	NA	stopgain	Gdpd4:uc012fpl.1:exon8:c.C670T:p.Q224X	exonic	ENSMUSG00000035582	NA	stopgain	ENSMUSG00000035582:ENSMUST00000170049:exon7:c.C670T:p.Q224X,ENSMUSG00000035582:ENSMUST00000041860:exon8:c.C670T:p.Q224X	7qE1	NA	NA	+	AGATTACGAGCAAGAAATACA	chr7	97972985	GAGxAAG	C	T	66_S3_L001_R1_001	64_Jiri_S1_L001_R1_001	0	NOVEL	COVERED	1	1	1	1	1	395	0	81.3518	87.1731	39.0024	64.0008	0.286713	0.02	1.93514
ACR_S9_1	chr7	98594871	98594871	T	G	exonic	2210018M11Rik	NA	nonsynonymous SNV	2210018M11Rik:NM_172280:exon18:c.A3001C:p.T1001P	exonic	2210018M11Rik	NA	nonsynonymous SNV	2210018M11Rik:uc009ikq.1:exon14:c.A2563C:p.T855P,2210018M11Rik:uc009iko.1:exon18:c.A3001C:p.T1001P,2210018M11Rik:uc009ikp.1:exon19:c.A3043C:p.T1015P	exonic	ENSMUSG00000035401	NA	nonsynonymous SNV	ENSMUSG00000035401:ENSMUST00000038359:exon18:c.A3001C:p.T1001P	7qE1	NA	NA	-	TGCTGTGTGGTTTTCACGGCA	chr7	98594871	TGGxTTT	T	G	66_S3_L001_R1_001	64_Jiri_S1_L001_R1_001	0	NOVEL	COVERED	0.641303	0.641347	0.999931	0.999931	0.991692	53	0	16.4991	17.6471	11.1351	5.98408	0.285714	0.02	-0.245278
ACR_S9_1	chr7	105610947	105610947	C	G	UTR3	Trim3	NM_018880:c.*111G>C,NM_001285871:c.*111G>C,NM_001285870:c.*111G>C	NA	NA	UTR3	Trim3	uc009iyo.2:c.*111G>C,uc009iym.2:c.*111G>C,uc009iyn.2:c.*111G>C	NA	NA	UTR3	ENSMUSG00000036989	ENSMUST00000057525:c.*111G>C,ENSMUST00000106789:c.*111G>C	NA	NA	7qE3	NA	NA	-	CACACCCGTGCCCATAGCCCA	chr7	105610947	GTGxCCA	C	G	66_S3_L001_R1_001	64_Jiri_S1_L001_R1_001	0	NOVEL	COVERED	0.888875	0.888875	1	1	1	96	0	16.3203	18.6837	3.87104	17.1067	0.236842	0.02	-0.358045
ACR_S9_1	chr7	109972989	109972989	G	A	UTR3	Tmem41b	NM_153525:c.*1793C>T	NA	NA	UTR3	Tmem41b	uc009jen.1:c.*1793C>T,uc009jeo.1:c.*1793C>T,uc009jep.1:c.*1793C>T	NA	NA	UTR3	ENSMUSG00000047554	ENSMUST00000094097:c.*1793C>T	NA	NA	7qE3	NA	NA	-	ACTGGGAGAAGAAAACATCCA	chr7	109972989	GAAxAAA	G	A	66_S3_L001_R1_001	64_Jiri_S1_L001_R1_001	0	NOVEL	COVERED	0.999678	0.999678	1	1	1	192	0	-2.80773	11.9951	12.4832	0	0.083333	0.02	0.844271
ACR_S9_1	chr7	120182208	120182208	A	G	exonic	Anks4b	NA	nonsynonymous SNV	Anks4b:NM_028085:exon2:c.A461G:p.Q154R	exonic	Anks4b	NA	nonsynonymous SNV	Anks4b:uc009jmj.2:exon2:c.A461G:p.Q154R	exonic	ENSMUSG00000030909	NA	nonsynonymous SNV	ENSMUSG00000030909:ENSMUST00000033201:exon2:c.A461G:p.Q154R	7qF2	NA	NA	+	GAACGGCTTCAGGAGAGGCAC	chr7	120182208	TTCxGGA	A	G	66_S3_L001_R1_001	64_Jiri_S1_L001_R1_001	0	NOVEL	COVERED	0.851984	0.851984	1	1	0.999998	85	0	22.9295	23.7822	10.5533	12.265	0.342105	0.02	-0.332807
ACR_S9_1	chr8	3921325	3921325	T	A	intronic	Cd209b	NA	NA	NA	intronic	Cd209b	NA	NA	NA	intronic	ENSMUSG00000065987	NA	NA	NA	8qA1.1	NA	NA	-	AAGGATGGAGTCCCACTAAAT	chr8	3921325	GAGxCCC	T	A	66_S3_L001_R1_001	64_Jiri_S1_L001_R1_001	0	NOVEL	COVERED	0.352705	0.353947	0.99649	0.99649	0	34	0	18.7025	18.8038	17.7969	11.3491	0.421053	0.02	-0.166406
ACR_S9_1	chr8	9991680	9991680	A	C	UTR3	Abhd13	NM_026868:c.*3262A>C,NM_001081119:c.*3262A>C	NA	NA	UTR3	Abhd13	uc012fzf.1:c.*3262A>C,uc009kum.1:c.*3262A>C	NA	NA	UTR3	ENSMUSG00000040396	ENSMUST00000139793:c.*3262A>C,ENSMUST00000048216:c.*3262A>C	NA	NA	8qA1.1	NA	NA	+	CTTTTTGACAAAAAAGTGCAA	chr8	9991680	ACAxAAA	A	C	66_S3_L001_R1_001	64_Jiri_S1_L001_R1_001	0	NOVEL	COVERED	1	1	1	1	1	282	0	10.5217	34.5621	27.0344	11.4188	0.122807	0.02	3.18912
ACR_S9_1	chr8	11619163	11619163	C	G	exonic	Ankrd10	NA	nonsynonymous SNV	Ankrd10:NM_001167967:exon4:c.G587C:p.G196A,Ankrd10:NM_133971:exon4:c.G587C:p.G196A,Ankrd10:NM_001281974:exon5:c.G38C:p.G13A,Ankrd10:NM_001281975:exon5:c.G179C:p.G60A	exonic	Ankrd10	NA	nonsynonymous SNV	Ankrd10:uc009kvo.3:exon4:c.G587C:p.G196A,Ankrd10:uc009kvr.3:exon4:c.G587C:p.G196A,Ankrd10:uc009kvp.3:exon5:c.G38C:p.G13A,Ankrd10:uc009kvq.3:exon5:c.G179C:p.G60A	exonic	ENSMUSG00000031508	NA	nonsynonymous SNV	ENSMUSG00000031508:ENSMUST00000033905:exon4:c.G587C:p.G196A,ENSMUSG00000031508:ENSMUST00000169782:exon4:c.G587C:p.G196A	8qA1.1	NA	NA	-	GCTCTCATGACCTCCACTCAA	chr8	11619163	TGAxCTC	C	G	66_S3_L001_R1_001	64_Jiri_S1_L001_R1_001	0	NOVEL	COVERED	0.976865	0.976865	1	1	0.999997	101	0	12.2529	17.717	5.40226	17.135	0.169811	0.02	1.11671
ACR_S9_1	chr8	20944657	20944657	C	A	exonic	AY761185	NA	nonsynonymous SNV	AY761185:NM_001012640:exon1:c.G54T:p.Q18H	exonic	AY761185	NA	nonsynonymous SNV	AY761185:uc009lbi.2:exon1:c.G54T:p.Q18H	exonic	ENSMUSG00000079120	NA	nonsynonymous SNV	ENSMUSG00000079120:ENSMUST00000110758:exon1:c.G54T:p.Q18H	8qA2	NA	NA	-	TAGAATCAGCCTGGACATAGA	chr8	20944657	AGCxTGG	C	A	66_S3_L001_R1_001	64_Jiri_S1_L001_R1_001	0	NOVEL	COVERED	1	1	1	1	1	209	0	29.7218	42.9176	11.7714	32.4717	0.174242	0.02	1.83643
ACR_S9_1	chr8	24060567	24060567	A	T	UTR3	Zmat4	NM_001277239:c.*806A>T,NM_177086:c.*806A>T	NA	NA	UTR3	Zmat4	uc012gbk.2:c.*806A>T,uc009lew.3:c.*806A>T	NA	NA	UTR3	ENSMUSG00000037492	ENSMUST00000042352:c.*806A>T	NA	NA	8qA2	NA	NA	+	ATTCTTAGCAAGTTGGCCTGG	chr8	24060567	GCAxGTT	A	T	66_S3_L001_R1_001	64_Jiri_S1_L001_R1_001	0	NOVEL	COVERED	0.999987	0.999987	1	1	1	200	0	-6.84445	12.4644	7.6527	6.16526	0.07619	0.02	2.07112
ACR_S9_1	chr8	25003225	25003225	A	C	intronic	Adam9	NA	NA	NA	intronic	Adam9	NA	NA	NA	intronic	ENSMUSG00000031555	NA	NA	NA	8qA2	NA	NA	-	GTTCGCTTTAAATTCTCAAAG	chr8	25003225	TTAxATT	A	C	66_S3_L001_R1_001	64_Jiri_S1_L001_R1_001	0	NOVEL	COVERED	1	1	1	1	1	284	0	34.3264	51.4651	38.4878	16.215	0.172619	0.02	3.11688
ACR_S9_1	chr8	31131215	31131215	G	A	UTR3	Rnf122	NM_175136:c.*2522G>A	NA	NA	UTR3	Rnf122	uc009ljd.1:c.*2522G>A,uc009lje.1:c.*2522G>A	NA	NA	UTR3	ENSMUSG00000039328	ENSMUST00000046941:c.*2522G>A	NA	NA	8qA3	NA	NA	+	TTCAGCAGCAGCCCGAGTGTA	chr8	31131215	GCAxCCC	G	A	66_S3_L001_R1_001	64_Jiri_S1_L001_R1_001	0	NOVEL	COVERED	0.967425	0.967425	1	1	0.999993	94	0	5.92314	12.6335	3.23384	9.20193	0.134615	0.02	1.04469
ACR_S9_1	chr8	43130542	43130542	T	G	exonic	Triml1	NA	nonsynonymous SNV	Triml1:NM_177742:exon6:c.A1021C:p.I341L	exonic	Triml1	NA	nonsynonymous SNV	Triml1:uc009lnz.1:exon6:c.A1021C:p.I341L,Triml1:uc012gct.1:exon6:c.A1006C:p.I336L	exonic	ENSMUSG00000031651	NA	nonsynonymous SNV	ENSMUSG00000031651:ENSMUST00000059692:exon6:c.A1021C:p.I341L	8qA4	NA	NA	-	CAGGTGAAGATCTGAGCTCCC	chr8	43130542	AGAxCTG	T	G	66_S3_L001_R1_001	64_Jiri_S1_L001_R1_001	0	NOVEL	COVERED	0.999962	0.999962	1	1	1	172	0	-4.6225	12.8135	6.62336	5.91872	0.081633	0.02	0.73019
ACR_S9_1	chr8	57524477	57524477	T	G	UTR3	Galnt7	NM_144731:c.*1637A>C,NM_001167981:c.*1637A>C	NA	NA	UTR3	Galnt7	uc009lsy.2:c.*1637A>C,uc009lsz.2:c.*1637A>C	NA	NA	UTR3	ENSMUSG00000031608	ENSMUST00000034021:c.*1637A>C	NA	NA	8qB2	NA	NA	-	TGTTGAATTTTTACTGCCCAA	chr8	57524477	TTTxTAC	T	G	66_S3_L001_R1_001	70_S7_L001_R1_001	0	NOVEL	COVERED	1	1	1	1	1	2184	0	-68.6744	126.305	75.9421	61.9906	0.07907	0.02	22.7893
ACR_S9_1	chr8	80993243	80993243	G	C	exonic	Usp38	NA	nonsynonymous SNV	Usp38:NM_027554:exon6:c.C1356G:p.N452K	exonic	Usp38	NA	nonsynonymous SNV	Usp38:uc009mjd.1:exon6:c.C1356G:p.N452K	exonic	ENSMUSG00000038250	NA	nonsynonymous SNV	ENSMUSG00000038250:ENSMUST00000042724:exon6:c.C1356G:p.N452K	8qC2	NA	NA	-	TGTAACACGTGTTTCCCAGGT	chr8	80993243	CGTxTTT	G	C	66_S3_L001_R1_001	64_Jiri_S1_L001_R1_001	0	NOVEL	COVERED	0.999999	0.999999	1	1	1	213	0	12.5871	28.969	27.1195	13.3109	0.130081	0.02	2.10991
ACR_S9_1	chr8	84260629	84260629	G	C	exonic	Ccdc130	NA	nonsynonymous SNV	Ccdc130:NM_001294281:exon7:c.C314G:p.A105G,Ccdc130:NM_026350:exon7:c.C314G:p.A105G	exonic	Ccdc130	NA	nonsynonymous SNV	Ccdc130:uc009mmk.1:exon2:c.C50G:p.A17G,Ccdc130:uc012ghi.1:exon6:c.C314G:p.A105G,Ccdc130:uc009mml.1:exon7:c.C314G:p.A105G	exonic	ENSMUSG00000004994	NA	nonsynonymous SNV	ENSMUSG00000004994:ENSMUST00000005120:exon7:c.C314G:p.A105G,ENSMUSG00000004994:ENSMUST00000098578:exon7:c.C314G:p.A105G	8qC2	NA	NA	-	GTCACAGTTGGCAGGGTCTGT	chr8	84260629	TTGxCAG	G	C	66_S3_L001_R1_001	70_S7_L001_R1_001	0	NOVEL	COVERED	0.351961	0.353947	0.994391	0.994391	0	32	0	6.99215	8.46412	0	8.46412	0.210526	0.02	-0.166568
ACR_S9_1	chr8	90933660	90933660	T	G	exonic	Chd9	NA	nonsynonymous SNV	Chd9:NM_177224:exon3:c.T1247G:p.F416C	exonic	Chd9	NA	nonsynonymous SNV	Chd9:uc009msi.2:exon1:c.T1247G:p.F416C,Chd9:uc009msf.2:exon3:c.T1247G:p.F416C	exonic	ENSMUSG00000056608	NA	nonsynonymous SNV	ENSMUSG00000056608:ENSMUST00000048665:exon3:c.T1247G:p.F416C,ENSMUSG00000056608:ENSMUST00000109614:exon3:c.T1247G:p.F416C	8qC4	NA	NA	+	CTCCCCCAATTTGACGAATCA	chr8	90933660	AATxTGA	T	G	66_S3_L001_R1_001	64_Jiri_S1_L001_R1_001	0	NOVEL	COVERED	0.979526	0.979526	1	1	0.999997	102	0	22.4586	25.9497	12.6821	22.856	0.236364	0.02	1.00933
ACR_S9_1	chr8	93337330	93337330	C	A	upstream	Ces1g	NA	NA	NA	upstream	Ces1g	NA	NA	NA	upstream	ENSMUSG00000057074	NA	NA	NA	8qC5	NA	NA	-	AATGGGACTTCTTAGTCACAC	chr8	93337330	CTTxTTA	C	A	66_S3_L001_R1_001	64_Jiri_S1_L001_R1_001	0	NOVEL	COVERED	0.781059	0.78106	0.999999	0.999999	0.999855	70	0	15.7304	17.2932	9.49732	13.1038	0.272727	0.02	-0.297738
ACR_S9_1	chr8	94772288	94772288	G	C	exonic	Cx3cl1	NA	nonsynonymous SNV	Cx3cl1:NM_009142:exon1:c.G24C:p.W8C	exonic	Cx3cl1	NA	nonsynonymous SNV	Cx3cl1:uc009mwx.1:exon1:c.G24C:p.W8C	exonic	ENSMUSG00000031778	NA	nonsynonymous SNV	ENSMUSG00000031778:ENSMUST00000034230:exon1:c.G24C:p.W8C,ENSMUSG00000031778:ENSMUST00000135970:exon1:c.G24C:p.W8C,ENSMUSG00000031778:ENSMUST00000150307:exon1:c.G24C:p.W8C	8qC5	NA	NA	+	CGCTCGCGTGGCTGCTGCGCC	chr8	94772288	GTGxCTG	G	C	66_S3_L001_R1_001	64_Jiri_S1_L001_R1_001	0	NOVEL	COVERED	0.758216	0.760887	0.99649	0.99649	0	48	0	6.36342	9.74398	7.22731	9.90101	0.16129	0.02	-0.289208
ACR_S9_1	chr8	95320852	95320852	A	T	intronic	Tepp	NA	NA	NA	intronic	Tepp	NA	NA	NA	intronic	ENSMUSG00000090206	NA	NA	NA	8qC5	NA	NA	+	TCATGCCAGAATCTGGCATCT	chr8	95320852	AGAxTCT	A	T	66_S3_L001_R1_001	64_Jiri_S1_L001_R1_001	0	NOVEL	COVERED	0.760887	0.760887	1	1	0.999912	70	0	1.93423	6.53384	2.94636	3.58811	0.121212	0.02	-0.288164
ACR_S9_1	chr8	104322507	104322507	G	C	intronic	Cmtm2b	NA	NA	NA	intronic	Cmtm2b	NA	NA	NA	intronic	ENSMUSG00000035785	NA	NA	NA	8qD3	NA	NA	+	TGGTAAACTAGATTGGAATGA	chr8	104322507	CTAxATT	G	C	66_S3_L001_R1_001	64_Jiri_S1_L001_R1_001	0	NOVEL	COVERED	0.979526	0.979526	1	1	0.999974	94	0	4.89738	12.1085	12.7763	0	0.12963	0.02	0.913235
ACR_S9_1	chr8	105707776	105707776	C	G	intronic	Enkd1	NA	NA	NA	UTR5	Enkd1	uc009ndy.1:c.-1205G>C	NA	NA	intronic	ENSMUSG00000013155	NA	NA	NA	8qD3	NA	NA	-	AAGCCGTGCTCAGGGGTGGGG	chr8	105707776	GCTxAGG	C	G	66_S3_L001_R1_001	64_Jiri_S1_L001_R1_001	0	NOVEL	COVERED	0.888873	0.888875	0.999998	0.999998	0.999725	74	0	6.2728	10.3729	6.49662	5.95185	0.175	0.02	-0.357165
ACR_S9_1	chr8	109942274	109942274	T	G	UTR3	Phlpp2	NM_001122594:c.*1366T>G	NA	NA	UTR3	Phlpp2	uc009njn.2:c.*1366T>G	NA	NA	UTR3	ENSMUSG00000031732	ENSMUST00000179721:c.*1366T>G,ENSMUST00000034175:c.*1366T>G	NA	NA	8qD3	NA	NA	+	CTAAGGAAACTCATTCCTATT	chr8	109942274	AACxCAT	T	G	66_S3_L001_R1_001	64_Jiri_S1_L001_R1_001	0	NOVEL	COVERED	1	1	1	1	1	1909	0	92.1043	219.693	157.899	96.0466	0.148876	0.02	21.7883
ACR_S9_1	chr8	111054080	111054080	G	C	intronic	Aars	NA	NA	NA	intronic	Aars	NA	NA	NA	intronic	ENSMUSG00000031960	NA	NA	NA	8qE1	NA	NA	+	ACAGGGCTCAGAGTCTGGTCC	chr8	111054080	TCAxAGT	G	C	66_S3_L001_R1_001	64_Jiri_S1_L001_R1_001	0	NOVEL	COVERED	0.976865	0.976865	1	1	0.999992	95	0	16.5388	21.1154	12.7434	7.94444	0.2	0.02	1.01874
ACR_S9_1	chr8	116931019	116931019	C	T	intronic	Cenpn	NA	NA	NA	intronic	Cenpn	NA	NA	NA	intronic	ENSMUSG00000031756	NA	NA	NA	8qE1	NA	NA	+	CAAGTCTTGCCAACTCTAAAC	chr8	116931019	TGCxAAC	C	T	66_S3_L001_R1_001	E210_S1	0	NOVEL	COVERED	0.998198	0.9982	0.999998	0.999998	0.999725	107	0	-6.06262	7.98595	8.11186	0	0.068493	0.02	0.851452
ACR_S9_1	chr8	124003242	124003242	T	C	exonic	Taf5l	NA	nonsynonymous SNV	Taf5l:NM_133966:exon4:c.A707G:p.E236G	exonic	Taf5l	NA	nonsynonymous SNV	Taf5l:uc009nww.2:exon4:c.A707G:p.E236G,Taf5l:uc009nwx.2:exon4:c.A707G:p.E236G	exonic	ENSMUSG00000038697	NA	nonsynonymous SNV	ENSMUSG00000038697:ENSMUST00000093039:exon4:c.A707G:p.E236G,ENSMUSG00000038697:ENSMUST00000165628:exon4:c.A707G:p.E236G	8qE2	NA	NA	-	CAGGGCAGCCTCATTCTGCAG	chr8	124003242	GCCxCAT	T	C	66_S3_L001_R1_001	E210_S1	0	NOVEL	COVERED	0.847205	0.851984	0.994391	0.994391	0	51	0	1.28571	7.16378	0	7.66195	0.105263	0.02	-0.333003
ACR_S9_1	chr8	124003243	124003243	C	T	exonic	Taf5l	NA	nonsynonymous SNV	Taf5l:NM_133966:exon4:c.G706A:p.E236K	exonic	Taf5l	NA	nonsynonymous SNV	Taf5l:uc009nww.2:exon4:c.G706A:p.E236K,Taf5l:uc009nwx.2:exon4:c.G706A:p.E236K	exonic	ENSMUSG00000038697	NA	nonsynonymous SNV	ENSMUSG00000038697:ENSMUST00000093039:exon4:c.G706A:p.E236K,ENSMUSG00000038697:ENSMUST00000165628:exon4:c.G706A:p.E236K	8qE2	NA	NA	-	AGGGCAGCCTCATTCTGCAGA	chr8	124003243	CCTxATT	C	T	66_S3_L001_R1_001	E210_S1	0	NOVEL	COVERED	0.847205	0.851984	0.994391	0.994391	0	51	0	0.877589	6.76453	0	7.26373	0.105263	0.02	-0.333152
ACR_S9_1	chr9	23366275	23366275	C	G	exonic	Bmper	NA	nonsynonymous SNV	Bmper:NM_028472:exon7:c.C660G:p.C220W	exonic	Bmper	NA	nonsynonymous SNV	Bmper:uc009oow.2:exon7:c.C660G:p.C220W	exonic	ENSMUSG00000031963	NA	nonsynonymous SNV	ENSMUSG00000031963:ENSMUST00000071982:exon7:c.C660G:p.C220W	9qA3	NA	NA	+	CAGGACAGTGCTGCCCCAAAT	chr9	23366275	GTGxTGC	C	G	66_S3_L001_R1_001	64_Jiri_S1_L001_R1_001	0	NOVEL	COVERED	0.490543	0.490544	0.999997	0.999997	0.998875	51	0	17.3536	17.7964	8.00307	11.4227	0.347826	0.02	-0.200252
ACR_S9_1	chr9	26759374	26759374	C	A	UTR3	B3gat1	NM_029792:c.*240C>A	NA	NA	UTR3	B3gat1	uc009opq.1:c.*240C>A,uc009opr.1:c.*240C>A	NA	NA	UTR3	ENSMUSG00000045994	ENSMUST00000160899:c.*240C>A,ENSMUST00000161115:c.*240C>A	NA	NA	9qA4	NA	NA	+	GCTGGGGATTCCGGTTGCCAG	chr9	26759374	ATTxCGG	C	A	66_S3_L001_R1_001	64_Jiri_S1_L001_R1_001	0	NOVEL	COVERED	0.851982	0.851984	0.999998	0.999998	0.999725	71	0	1.00101	6.86689	3.27061	5.56735	0.105263	0.02	-0.332672
ACR_S9_1	chr9	39597732	39597732	G	T	intronic	AW551984	NA	NA	NA	intronic	AW551984	NA	NA	NA	intronic	ENSMUSG00000038112	NA	NA	NA	9qA5.1	NA	NA	-	AAAGTGATTGGGTGTGCACAT	chr9	39597732	TTGxGTG	G	T	66_S3_L001_R1_001	64_Jiri_S1_L001_R1_001	0	NOVEL	COVERED	0.984161	0.984161	1	1	0.999974	96	0	-0.399689	8.50572	4.67532	3.6539	0.105263	0.02	0.895964
ACR_S9_1	chr9	40290666	40290666	T	G	UTR3	Scn3b	NM_001083917:c.*2139T>G,NM_001286614:c.*2139T>G,NM_178227:c.*2229T>G	NA	NA	UTR3	Scn3b	uc009ozm.1:c.*2139T>G,uc009ozj.1:c.*2139T>G,uc009ozk.1:c.*2229T>G,uc009ozl.2:c.*2139T>G	NA	NA	UTR3	ENSMUSG00000049281	ENSMUST00000114956:c.*2139T>G,ENSMUST00000049941:c.*2139T>G,ENSMUST00000176185:c.*2139T>G,ENSMUST00000171835:c.*2229T>G	NA	NA	9qA5.1	NA	NA	+	TAAGTGGAAATACTCAGTGCT	chr9	40290666	AAAxACT	T	G	66_S3_L001_R1_001	64_Jiri_S1_L001_R1_001	0	NOVEL	COVERED	0.998696	0.998696	1	1	0.999997	122	0	27.5796	33.2632	25.6467	11.5272	0.213333	0.02	0.833986
ACR_S9_1	chr9	40804289	40804289	A	T	exonic	Hspa8	NA	nonsynonymous SNV	Hspa8:NM_031165:exon7:c.A1448T:p.N483I	exonic	Hspa8	NA	nonsynonymous SNV	Hspa8:uc009ozx.3:exon7:c.A1448T:p.N483I,Hspa8:uc009ozy.3:exon7:c.A1391T:p.N464I	exonic	ENSMUSG00000015656	NA	nonsynonymous SNV	ENSMUSG00000015656:ENSMUST00000015800:exon7:c.A1448T:p.N483I,ENSMUSG00000015656:ENSMUST00000117557:exon7:c.A1391T:p.N464I	9qA5.1	NA	NA	+	ATCGATGCCAATGGCATCCTC	chr9	40804289	CCAxTGG	A	T	66_S3_L001_R1_001	70_S7_L001_R1_001	0	NOVEL	COVERED	0.959859	0.959859	1	1	0.999997	100	4	-2.61773	6.36939	2.87363	3.23169	0.08	0.02	-0.438091
ACR_S9_1	chr9	57834099	57834099	T	C	exonic	Arid3b	NA	synonymous SNV	Arid3b:NM_019689:exon1:c.A63G:p.L21L	exonic	Arid3b	NA	synonymous SNV	Arid3b:uc009pvt.2:exon1:c.A63G:p.L21L,Arid3b:uc009pvu.1:exon1:c.A63G:p.L21L,Arid3b:uc009pvv.1:exon2:c.A63G:p.L21L,Arid3b:uc009pvw.1:exon2:c.A63G:p.L21L	exonic	ENSMUSG00000004661,ENSMUSG00000091908	NA	synonymous SNV	ENSMUSG00000004661:ENSMUST00000004780:exon1:c.A63G:p.L21L,ENSMUSG00000004661:ENSMUST00000098686:exon2:c.A63G:p.L21L,ENSMUSG00000004661:ENSMUST00000114165:exon2:c.A63G:p.L21L,ENSMUSG00000004661:ENSMUST00000164010:exon2:c.A63G:p.L21L,ENSMUSG00000004661:ENSMUST00000164035:exon2:c.A63G:p.L21L,ENSMUSG00000004661:ENSMUST00000171444:exon2:c.A63G:p.L21L,ENSMUSG00000091908:ENSMUST00000163186:exon4:c.T288C…	9qB	NA	NA	-	CATCCATCTGTAGCAGAGGCT	chr9	57834099	CTGxAGC	T	C	66_S3_L001_R1_001	64_Jiri_S1_L001_R1_001	0	NOVEL	COVERED	0.490234	0.490544	0.999366	0.999366	0	40	0	5.80168	8.0994	0	8.1843	0.173913	0.02	-0.201381
ACR_S9_1	chr9	59525383	59525383	C	A	exonic	Tmem202	NA	synonymous SNV	Tmem202:NM_178388:exon1:c.G60T:p.G20G	exonic	Tmem202	NA	synonymous SNV	Tmem202:uc009pxv.1:exon1:c.G60T:p.G20G	exonic	ENSMUSG00000049526	NA	synonymous SNV	ENSMUSG00000049526:ENSMUST00000055345:exon1:c.G60T:p.G20G	9qB	NA	NA	-	ATCTCAGGTCCCCCTTTATTT	chr9	59525383	GTCxCCC	C	A	66_S3_L001_R1_001	64_Jiri_S1_L001_R1_001	0	NOVEL	COVERED	0.999999	0.999999	1	1	1	266	0	-13.9712	9.94551	7.3902	5.40775	0.059322	0.02	1.74888
ACR_S9_1	chr9	60688095	60688095	C	T	UTR5	Lrrc49	NM_145616:c.-236G>A,NM_001146046:c.-236G>A	NA	NA	ncRNA_intronic	AK047520	NA	NA	NA	ncRNA_intronic	ENSMUSG00000097734	NA	NA	NA	9qB	NA	NA	-	TTTTTTTTTTCCAGGCCGCTT	chr9	60688095	TTTxCAG	C	T	66_S3_L001_R1_001	70_S7_L001_R1_001	0	NOVEL	COVERED	0.457755	0.457757	0.999997	0.999997	0.999693	54	0	5.70079	6.44026	8.01772	0	0.266667	0.02	-0.191625
ACR_S9_1	chr9	63147000	63147000	C	T	UTR5	Skor1	NM_001163757:c.-87G>A,NM_001163755:c.-87G>A	NA	NA	UTR5	Skor1	uc009qau.2:c.-87G>A,uc012guu.1:c.-87G>A	NA	NA	UTR5	ENSMUSG00000022245	ENSMUST00000119146:c.-87G>A	NA	NA	9qB	NA	NA	-	GGTCCTGAAGCCCGGACTTCA	chr9	63147000	AAGxCCG	C	T	66_S3_L001_R1_001	64_Jiri_S1_L001_R1_001	0	NOVEL	COVERED	0.865632	0.865745	0.999869	0.999869	0.984784	60	0	2.55768	7.60994	0	7.66983	0.131579	0.02	-0.34111
ACR_S9_1	chr9	63757778	63757778	C	G	UTR5	Smad3	NM_016769:c.-101G>C	NA	NA	UTR5	Smad3	uc009qbi.1:c.-101G>C	NA	NA	UTR5	ENSMUSG00000032402	ENSMUST00000034973:c.-101G>C	NA	NA	9qC	NA	NA	-	GCCCGAACTTCGCTTTTAACT	chr9	63757778	CTTxGCT	C	G	66_S3_L001_R1_001	64_Jiri_S1_L001_R1_001	0	NOVEL	COVERED	0.641257	0.641347	0.99986	0.99986	0.982485	47	0	4.30309	7.04405	1.42624	5.77875	0.16	0.02	-0.243376
ACR_S9_1	chr9	64137906	64137906	C	G	exonic	Lctl	NA	synonymous SNV	Lctl:NM_145835:exon14:c.C1686G:p.L562L	exonic	Lctl	NA	synonymous SNV	Lctl:uc009qbl.1:exon14:c.C1686G:p.L562L	exonic	ENSMUSG00000032401	NA	synonymous SNV	ENSMUSG00000032401:ENSMUST00000034969:exon14:c.C1686G:p.L562L	9qC	NA	NA	+	CACTTCTCCTCAGGAGACGTG	chr9	64137906	CCTxAGG	C	G	66_S3_L001_R1_001	70_S7_L001_R1_001	0	NOVEL	COVERED	0.967425	0.967425	1	1	1	101	0	0.545248	8.79181	6.17338	8.25379	0.098039	0.02	1.04415
ACR_S9_1	chr9	78430631	78430631	G	C	UTR3	Mb21d1	NM_173386:c.*2294C>G	NA	NA	ncRNA_exonic	AK146160	NA	NA	NA	ncRNA_exonic	ENSMUSG00000087052	NA	NA	NA	9qE1	NA	NA	-	ACTGGAAAAGGCTCCTGCAAC	chr9	78430631	AAGxCTC	G	C	66_S3_L001_R1_001	64_Jiri_S1_L001_R1_001	0	NOVEL	COVERED	1	1	1	1	1	370	0	16.4367	43.9092	18.9884	32.5163	0.121827	0.02	2.84747
ACR_S9_1	chr9	83395386	83395386	G	C	exonic	Lca5	NA	nonsynonymous SNV	Lca5:NM_027448:exon8:c.C1904G:p.A635G	exonic	Lca5	NA	nonsynonymous SNV	Lca5:uc009qwh.2:exon8:c.C1904G:p.A635G	exonic	ENSMUSG00000032258	NA	nonsynonymous SNV	ENSMUSG00000032258:ENSMUST00000034791:exon8:c.C1904G:p.A635G	9qE2	NA	NA	-	ACCTCTGCTGGCAGCAGGGAA	chr9	83395386	CTGxCAG	G	C	66_S3_L001_R1_001	64_Jiri_S1_L001_R1_001	0	NOVEL	COVERED	0.999973	0.999973	1	1	1	163	0	-11.6328	8.54201	4.01904	4.47574	0.06	0.02	2.01961
ACR_S9_1	chr9	88463064	88463064	G	C	exonic	Syncrip	NA	nonsynonymous SNV	Syncrip:NM_001284328:exon8:c.C899G:p.A300G,Syncrip:NM_019666:exon8:c.C899G:p.A300G,Syncrip:NM_019796:exon8:c.C899G:p.A300G	exonic	Syncrip	NA	nonsynonymous SNV	Syncrip:uc009qyp.2:exon7:c.C605G:p.A202G,Syncrip:uc009qyo.2:exon8:c.C899G:p.A300G,Syncrip:uc009qyq.2:exon8:c.C899G:p.A300G,Syncrip:uc009qyr.1:exon8:c.C899G:p.A300G	exonic	ENSMUSG00000032423	NA	nonsynonymous SNV	ENSMUSG00000032423:ENSMUST00000174361:exon7:c.C899G:p.A300G,ENSMUSG00000032423:ENSMUST00000174391:exon7:c.C605G:p.A202G,ENSMUSG00000032423:ENSMUST00000069221:exon8:c.C899G:p.A300G,ENSMUSG00000032423:ENSMUST00000173801:exon8:c.C899G:p.A300G,ENSMUSG00000032423:ENSMUST00000174269:exon8:c.C899G:p.A300G,ENSMUSG00000032423:ENSMUST00000174282:exon8:c.C899G:p.A300G	9qE3.1	NA	NA	-	TCTTGCCTGGGCAGCTGTTTT	chr9	88463064	TGGxCAG	G	C	66_S3_L001_R1_001	64_Jiri_S1_L001_R1_001	0	NOVEL	COVERED	1	1	1	1	1	732	1	-8.02582	64.7145	36.1489	33.5751	0.092166	0.02	9.04361
ACR_S9_1	chr9	96542208	96542208	A	C	UTR3	Rasa2	NM_053268:c.*237T>G	NA	NA	UTR3	Rasa2	uc009rcn.1:c.*237T>G	NA	NA	UTR3	ENSMUSG00000032413	ENSMUST00000034984:c.*237T>G	NA	NA	9qE3.3	NA	NA	-	AGCTGCAGGGACACGGGGCTG	chr9	96542208	GGGxCAC	A	C	66_S3_L001_R1_001	64_Jiri_S1_L001_R1_001	0	NOVEL	COVERED	0.999487	0.999487	1	1	1	170	0	-4.89342	9.47874	5.96939	3.16085	0.085366	0.02	0.773925
ACR_S9_1	chr9	105076312	105076312	C	G	intronic	Mrpl3	NA	NA	NA	UTR3	Mrpl3	uc009rhs.1:c.*1052C>G	NA	NA	UTR3	ENSMUSG00000032563	ENSMUST00000149243:c.*1052C>G	NA	NA	9qF1	NA	NA	+	TGCTGTGAATCCAGACATAAT	chr9	105076312	AATxCAG	C	G	66_S3_L001_R1_001	64_Jiri_S1_L001_R1_001	0	NOVEL	COVERED	1	1	1	1	1	1046	0	46.6587	126.186	55.1234	72.9774	0.126712	0.02	11.7008
ACR_S9_1	chr9	107563451	107563451	G	C	exonic	Tusc2	NA	nonsynonymous SNV	Tusc2:NM_019742:exon1:c.G65C:p.G22A	exonic	Tusc2	NA	nonsynonymous SNV	Tusc2:uc009rls.1:exon1:c.G65C:p.G22A	exonic	ENSMUSG00000010054	NA	nonsynonymous SNV	ENSMUSG00000010054:ENSMUST00000010198:exon1:c.G65C:p.G22A	9qF1	NA	NA	+	GGGGGCGGCGGCCCAGAGGCG	chr9	107563451	GCGxCCC	G	C	66_S3_L001_R1_001	64_Jiri_S1_L001_R1_001	0	NOVEL	COVERED	0.899205	0.899314	0.999879	0.999879	0.986224	64	0	11.1799	14.5632	8.28692	12.8907	0.2	0.02	-0.366692
ACR_S9_1	chr9	112065826	112065826	G	T	exonic	Arpp21	NA	nonsynonymous SNV	Arpp21:NM_001177616:exon19:c.C2309A:p.S770Y,Arpp21:NM_001177618:exon19:c.C2369A:p.S790Y,Arpp21:NM_033264:exon19:c.C2363A:p.S788Y	exonic	Arpp21	NA	nonsynonymous SNV	Arpp21:uc009rvy.2:exon17:c.C2264A:p.S755Y,Arpp21:uc009rwa.2:exon17:c.C1343A:p.S448Y,Arpp21:uc009rvx.2:exon19:c.C2369A:p.S790Y,Arpp21:uc009rvz.2:exon19:c.C2363A:p.S788Y,Arpp21:uc009rwb.2:exon19:c.C2309A:p.S770Y	exonic	ENSMUSG00000032503	NA	nonsynonymous SNV	ENSMUSG00000032503:ENSMUST00000162065:exon18:c.C2369A:p.S790Y,ENSMUSG00000032503:ENSMUST00000035085:exon19:c.C2309A:p.S770Y,ENSMUSG00000032503:ENSMUST00000070218:exon19:c.C2369A:p.S790Y,ENSMUSG00000032503:ENSMUST00000111872:exon19:c.C2369A:p.S790Y,ENSMUSG00000032503:ENSMUST00000164754:exon19:c.C2363A:p.S788Y,ENSMUSG00000032503:ENSMUST00000162097:exon21:c.C2363A:p.S788Y	9qF3	NA	NA	-	GCAACTAGCGGACATGACAGG	chr9	112065826	GCGxACA	G	T	66_S3_L001_R1_001	64_Jiri_S1_L001_R1_001	0	NOVEL	COVERED	0.986153	0.986153	1	1	1	116	0	6.8693	14.4605	11.6048	11.0991	0.135593	0.02	0.982795
ACR_S9_1	chr9	123438159	123438159	G	C	exonic	Lars2	NA	nonsynonymous SNV	Lars2:NM_153168:exon13:c.G1545C:p.E515D	exonic	Lars2	NA	nonsynonymous SNV	Lars2:uc009sgd.1:exon13:c.G1545C:p.E515D	exonic	ENSMUSG00000035202	NA	nonsynonymous SNV	ENSMUSG00000035202:ENSMUST00000038863:exon13:c.G1545C:p.E515D	9qF4	NA	NA	+	CAAAGAGAGAGACGGACACCA	chr9	123438159	AGAxACG	G	C	66_S3_L001_R1_001	64_Jiri_S1_L001_R1_001	0	NOVEL	COVERED	0.998465	0.998465	1	1	1	151	0	23.9299	29.9774	15.2485	18.0428	0.202703	0.02	0.940743
ACR_S9_1	chr10	4453044	4453044	C	G	intronic	1700052N19Rik	NA	NA	NA	UTR3	1700052N19Rik	uc007egz.1:c.*2163C>G	NA	NA	UTR3	ENSMUSG00000061759	ENSMUST00000118544:c.*2163C>G	NA	NA	10qA1	NA	NA	+	TGTCCAATGGCCATTAGCAAG	chr10	4453044	TGGxCAT	C	G	66_S3_L001_R1_001	64_Jiri_S1_L001_R1_001	0	NOVEL	COVERED	1	1	1	1	1	310	0	10.2365	39.2581	27.367	13.4612	0.112245	0.02	2.85535
ACR_S9_1	chr10	60134933	60134933	T	G	intergenic	Spock2,Chst3	dist=1020;dist=46595	NA	NA	intergenic	Spock2,Chst3	dist=1020;dist=46595	NA	NA	UTR3	ENSMUSG00000058297	ENSMUST00000121820:c.*3452T>G	NA	NA	10qB4	NA	NA	NA	AGATGTCTTTTAAAAAATCTG	chr10	60134933	TTTxAAA	T	G	66_S3_L001_R1_001	64_Jiri_S1_L001_R1_001	0	NOVEL	COVERED	1	1	1	1	1	267	0	35.5809	50.874	35.7228	22.197	0.168919	0.02	3.4703
ACR_S9_1	chr10	62812997	62812997	A	G	exonic	Tet1	NA	synonymous SNV	Tet1:NM_027384:exon11:c.T5559C:p.P1853P,Tet1:NM_001253857:exon12:c.T5655C:p.P1885P	exonic	Tet1	NA	synonymous SNV	Tet1:uc007fje.2:exon11:c.T5559C:p.P1853P,Tet1:uc011xfg.1:exon12:c.T5655C:p.P1885P	exonic	ENSMUSG00000047146	NA	synonymous SNV	ENSMUSG00000047146:ENSMUST00000174121:exon3:c.T822C:p.P274P,ENSMUSG00000047146:ENSMUST00000050826:exon11:c.T5559C:p.P1853P,ENSMUSG00000047146:ENSMUST00000174189:exon13:c.T5655C:p.P1885P	10qB4	NA	NA	-	CATCCGCTTCAGGGTGCCGCT	chr10	62812997	TTCxGGG	A	G	66_S3_L001_R1_001	64_Jiri_S1_L001_R1_001	0	NOVEL	COVERED	0.995083	0.995084	1	1	0.999994	110	0	21.9265	26.515	3.91899	22.2414	0.227273	0.02	0.913619
ACR_S9_1	chr10	70267228	70267228	C	A	exonic	Slc16a9	NA	synonymous SNV	Slc16a9:NM_025807:exon3:c.C333A:p.I111I	exonic	Slc16a9	NA	synonymous SNV	Slc16a9:uc007fnr.1:exon1:c.C54A:p.I18I,Slc16a9:uc007fnq.1:exon3:c.C333A:p.I111I	exonic	ENSMUSG00000037762	NA	synonymous SNV	ENSMUSG00000037762:ENSMUST00000046807:exon3:c.C333A:p.I111I	10qB5.3	NA	NA	+	CCTATGGCATCGTTGTAGGTA	chr10	70267228	CATxGTT	C	A	66_S3_L001_R1_001	64_Jiri_S1_L001_R1_001	0	NOVEL	COVERED	0.97082	0.97082	1	1	0.999992	94	0	-0.260648	8.41684	3.93232	4.98248	0.09434	0.02	1.13474
ACR_S9_1	chr10	71238051	71238051	C	G	upstream	Tfam	NA	NA	NA	intronic	Tfam	NA	NA	NA	UTR5	ENSMUSG00000003923	ENSMUST00000092430:c.-111G>C	NA	NA	10qB5.3	NA	NA	-	TGTTATCATGCCCGCCGCGCG	chr10	71238051	ATGxCCG	C	G	66_S3_L001_R1_001	64_Jiri_S1_L001_R1_001	0	NOVEL	COVERED	0.490476	0.490544	0.99986	0.99986	0.982485	42	0	15.217	15.8637	6.70179	16.4379	0.318182	0.02	-0.201654
ACR_S9_1	chr10	74486287	74486287	G	A	exonic	Pcdh15	NA	nonsynonymous SNV	Pcdh15:NM_001142738:exon22:c.G2978A:p.G993E,Pcdh15:NM_001142736:exon23:c.G3089A:p.G1030E,Pcdh15:NM_001142740:exon23:c.G3089A:p.G1030E,Pcdh15:NM_001142743:exon23:c.G3089A:p.G1030E,Pcdh15:NM_001142748:exon23:c.G3089A:p.G1030E,Pcdh15:NM_001142747:exon24:c.G3104A:p.G1035E	exonic	Pcdh15	NA	nonsynonymous SNV	Pcdh15:uc011xfz.1:exon13:c.G1526A:p.G509E,Pcdh15:uc011xga.1:exon16:c.G2021A:p.G674E,Pcdh15:uc033fqc.1:exon20:c.G2876A:p.G959E,Pcdh15:uc011xgc.1:exon21:c.G2876A:p.G959E,Pcdh15:uc033fqb.1:exon21:c.G3023A:p.G1008E,Pcdh15:uc033fqd.1:exon21:c.G3023A:p.G1008E,Pcdh15:uc007fpi.2:exon22:c.G3023A:p.G1008E,Pcdh15:uc007fpj.2:exon22:c.G3023A:p.G1008E,Pcdh15:uc011xgb.1:exon22:c.G2978A:p.G993E,Pcdh15:uc033fqa.1…	exonic	ENSMUSG00000052613	NA	nonsynonymous SNV	ENSMUSG00000052613:ENSMUST00000134009:exon13:c.G1526A:p.G509E,ENSMUSG00000052613:ENSMUST00000124046:exon16:c.G1922A:p.G641E,ENSMUSG00000052613:ENSMUST00000064562:exon21:c.G2876A:p.G959E,ENSMUSG00000052613:ENSMUST00000105429:exon21:c.G2876A:p.G959E,ENSMUSG00000052613:ENSMUST00000126920:exon22:c.G3023A:p.G1008E,ENSMUSG00000052613:ENSMUST00000129404:exon22:c.G3023A:p.G1008E,ENSMUSG00000052613:ENSMUS…	10qB5.3	NA	NA	+	TTACATCCTGGAGAGATCCCA	chr10	74486287	CTGxAGA	G	A	66_S3_L001_R1_001	64_Jiri_S1_L001_R1_001	0	NOVEL	COVERED	0.9937	0.993703	0.999997	0.999997	0.999693	97	0	2.21646	12.1137	7.43172	8.83007	0.107692	0.02	0.930756
ACR_S9_1	chr10	75937549	75937549	G	A	intronic	Chchd10	NA	NA	NA	intronic	Chchd10	NA	NA	NA	intronic	ENSMUSG00000049422	NA	NA	NA	10qC1	NA	NA	+	GCTGATCAGCGCTTTGTGCTG	chr10	75937549	AGCxCTT	G	A	66_S3_L001_R1_001	64_Jiri_S1_L001_R1_001	0	NOVEL	COVERED	0.638361	0.641347	0.995343	0.995343	0	42	0	10.0486	11.9581	6.54827	7.58395	0.222222	0.02	-0.245203
ACR_S9_1	chr10	78185157	78185157	A	C	upstream	Pwp2	NA	NA	NA	upstream	Pwp2	NA	NA	NA	upstream	ENSMUSG00000032834	NA	NA	NA	10qC1	NA	NA	-	GGCGCTTAAAACGCGCACTTC	chr10	78185157	AAAxCGC	A	C	66_S3_L001_R1_001	64_Jiri_S1_L001_R1_001	0	NOVEL	COVERED	0.934489	0.934492	0.999997	0.999997	0.999646	76	0	12.8572	16.6643	10.8789	12.5988	0.2	0.02	-0.401236
ACR_S9_1	chr10	81144396	81144396	C	G	exonic	Zbtb7a	NA	nonsynonymous SNV	Zbtb7a:NM_010731:exon2:c.C423G:p.S141R	exonic	Zbtb7a	NA	nonsynonymous SNV	Zbtb7a:uc007gfz.1:exon2:c.C423G:p.S141R,Zbtb7a:uc007gga.2:exon2:c.C423G:p.S141R,Zbtb7a:uc007ggb.1:exon2:c.C423G:p.S141R	exonic	ENSMUSG00000035011	NA	nonsynonymous SNV	ENSMUSG00000035011:ENSMUST00000048128:exon2:c.C423G:p.S141R,ENSMUSG00000035011:ENSMUST00000117956:exon2:c.C423G:p.S141R,ENSMUSG00000035011:ENSMUST00000119606:exon2:c.C423G:p.S141R,ENSMUSG00000035011:ENSMUST00000121840:exon2:c.C423G:p.S141R,ENSMUSG00000035011:ENSMUST00000125261:exon2:c.C423G:p.S141R	10qC1	NA	NA	+	GCGACGCGAGCCAGCCCGACG	chr10	81144396	GAGxCAG	C	G	66_S3_L001_R1_001	64_Jiri_S1_L001_R1_001	0	NOVEL	COVERED	0.87767	0.877708	0.999957	0.999957	0.993897	66	0	12.8635	15.9501	16.4859	0	0.205128	0.02	-0.348888
ACR_S9_1	chr10	81427084	81427084	G	C	exonic	Nfic	NA	nonsynonymous SNV	Nfic:NM_008688:exon1:c.C22G:p.L8V,Nfic:NM_026756:exon1:c.C22G:p.L8V	exonic	Nfic	NA	nonsynonymous SNV	Nfic:uc007ghy.1:exon1:c.C22G:p.L8V,Nfic:uc007ghz.1:exon1:c.C22G:p.L8V	exonic	ENSMUSG00000055053	NA	nonsynonymous SNV	ENSMUSG00000055053:ENSMUST00000020461:exon1:c.C22G:p.L8V,ENSMUSG00000055053:ENSMUST00000078185:exon1:c.C22G:p.L8V,ENSMUSG00000055053:ENSMUST00000105321:exon1:c.C22G:p.L8V	10qC1	NA	NA	-	ACCTGGGTCAGGCAGAGCGGG	chr10	81427084	TCAxGCA	G	C	66_S3_L001_R1_001	64_Jiri_S1_L001_R1_001	0	NOVEL	COVERED	0.999317	0.999317	1	1	1	146	0	16.6085	24.0746	19.4249	6.11382	0.1875	0.02	0.792104
ACR_S9_1	chr10	81647322	81647322	A	G	UTR3	Ankrd24	NM_027480:c.*145A>G	NA	NA	UTR3	Ankrd24	uc011xjk.1:c.*145A>G	NA	NA	UTR3	ENSMUSG00000054708	ENSMUST00000119336:c.*145A>G,ENSMUST00000132458:c.*145A>G	NA	NA	10qC1	NA	NA	+	TGGCCAGCTGACCACCCCACA	chr10	81647322	CTGxCCA	A	G	66_S3_L001_R1_001	70_S7_L001_R1_001	0	NOVEL	COVERED	0.999999	0.999999	1	1	1	213	0	-14.9522	9.53966	9.6054	-0.005158	0.058333	0.02	1.93283
ACR_S9_1	chr10	92940285	92940285	A	C	intergenic	Nedd1,Cdk17	dist=217867;dist=220591	NA	NA	intergenic	BC065048,AK039960	dist=103939;dist=76250	NA	NA	exonic	ENSMUSG00000020014	NA	nonsynonymous SNV	ENSMUSG00000020014:ENSMUST00000164979:exon1:c.T13G:p.F5V	10qC2	NA	NA	NA	CCCAGGCAAAACTCCACCTTC	chr10	92940285	AAAxCTC	A	C	66_S3_L001_R1_001	64_Jiri_S1_L001_R1_001	0	NOVEL	COVERED	0.888873	0.888875	0.999997	0.999997	0.999646	71	0	3.54593	8.67915	1.45789	9.24572	0.146341	0.02	-0.357575
ACR_S9_1	chr10	94833598	94833598	A	C	intronic	Plxnc1	NA	NA	NA	intronic	Plxnc1	NA	NA	NA	intronic	ENSMUSG00000074785	NA	NA	NA	10qC2	NA	NA	-	AGTAAGGATGATAAGCTGACA	chr10	94833598	ATGxTAA	A	C	66_S3_L001_R1_001	64_Jiri_S1_L001_R1_001	0	NOVEL	COVERED	0.641259	0.641347	0.999863	0.999863	0.983538	48	0	6.6609	9.38499	10.4678	0	0.178571	0.02	-0.245455
ACR_S9_1	chr10	99125319	99125319	A	C	intronic	Poc1b	NA	NA	NA	intronic	Poc1b	NA	NA	NA	intronic	ENSMUSG00000019952	NA	NA	NA	10qC3	NA	NA	+	ATTTCACACAAGTTTCTCAAA	chr10	99125319	ACAxGTT	A	C	66_S3_L001_R1_001	64_Jiri_S1_L001_R1_001	0	NOVEL	COVERED	1	1	1	1	1	273	0	23.8594	37.4654	17.7621	19.7207	0.183099	0.02	1.54757
ACR_S9_1	chr10	116795620	116795620	G	T	exonic	Myrfl	NA	nonsynonymous SNV	Myrfl:NM_001033333:exon19:c.C2035A:p.P679T	exonic	Myrfl	NA	nonsynonymous SNV	Myrfl:uc007hci.1:exon19:c.C2035A:p.P679T	exonic	ENSMUSG00000034057	NA	nonsynonymous SNV	ENSMUSG00000034057:ENSMUST00000048229:exon19:c.C2035A:p.P679T	10qD2	NA	NA	-	GTTGTATGGGGAGCTGTAAGG	chr10	116795620	GGGxAGC	G	T	66_S3_L001_R1_001	64_Jiri_S1_L001_R1_001	0	NOVEL	COVERED	0.992926	0.992926	1	1	1	127	0	16.4706	21.5091	7.37316	13.6794	0.2	0.02	0.95708
ACR_S9_1	chr10	117690500	117690500	A	G	exonic	Mdm2	NA	nonsynonymous SNV	Mdm2:NM_001288586:exon11:c.T1033C:p.S345P,Mdm2:NM_010786:exon12:c.T1180C:p.S394P	exonic	Mdm2	NA	nonsynonymous SNV	Mdm2:uc007hdl.2:exon10:c.T589C:p.S197P,Mdm2:uc033fss.1:exon11:c.T1033C:p.S345P,Mdm2:uc007hdm.2:exon12:c.T1180C:p.S394P,Mdm2:uc011xno.2:exon12:c.T589C:p.S197P	exonic	ENSMUSG00000020184	NA	nonsynonymous SNV	ENSMUSG00000020184:ENSMUST00000020408:exon12:c.T1180C:p.S394P,ENSMUSG00000020184:ENSMUST00000105263:exon12:c.T1033C:p.S345P	10qD2	NA	NA	-	GATGGTTGGGAATAGTCGTCA	chr10	117690500	GGGxATA	A	G	66_S3_L001_R1_001	64_Jiri_S1_L001_R1_001	0	NOVEL	COVERED	0.999948	0.999948	1	1	1	167	0	15.6128	27.1788	13.7775	17.8815	0.145833	0.02	0.738433
ACR_S9_1	chr10	127087067	127087067	G	C	exonic	Agap2	NA	synonymous SNV	Agap2:NM_001033263:exon8:c.G1917C:p.R639R,Agap2:NM_001301014:exon8:c.G1917C:p.R639R	exonic	Agap2	NA	synonymous SNV	Agap2:uc007hhx.1:exon8:c.G1917C:p.R639R,Agap2:uc007hhy.1:exon8:c.G1917C:p.R639R	exonic	ENSMUSG00000025422	NA	synonymous SNV	ENSMUSG00000025422:ENSMUST00000039259:exon8:c.G1917C:p.R639R	10qD3	NA	NA	+	CAGCCAAGCGGCGGACCAGCC	chr10	127087067	GCGxCGG	G	C	66_S3_L001_R1_001	64_Jiri_S1_L001_R1_001	0	NOVEL	COVERED	0.987943	0.987943	1	1	0.999994	103	0	-2.15814	8.16431	6.91729	1.28085	0.084746	0.02	0.982795
ACR_S9_1	chr10	128428717	128428717	C	T	intronic	Rnf41	NA	NA	NA	intronic	Rnf41	NA	NA	NA	intronic	ENSMUSG00000025373	NA	NA	NA	10qD3	NA	NA	+	AGTGGGCCTCCGGGCAGGTAG	chr10	128428717	CTCxGGG	C	T	66_S3_L001_R1_001	64_Jiri_S1_L001_R1_001	0	NOVEL	COVERED	0.909068	0.909069	0.999999	0.999999	0.999806	78	0	-0.345558	6.49219	0	7.17231	0.095238	0.02	-0.366562
ACR_S9_1	chr11	3517620	3517620	C	G	UTR3	Smtn	NM_001284429:c.*228G>C,NM_001159284:c.*228G>C,NM_013870:c.*228G>C,NM_001284427:c.*57G>C,NM_001284428:c.*228G>C	NA	NA	UTR3	Smtn	uc007hte.2:c.*228G>C,uc011xqq.1:c.*228G>C,uc007htg.2:c.*228G>C,uc007hth.2:c.*228G>C,uc007htf.2:c.*228G>C,uc007hti.2:c.*57G>C	NA	NA	UTR3	ENSMUSG00000020439	ENSMUST00000170588:c.*228G>C,ENSMUST00000020721:c.*228G>C,ENSMUST00000075118:c.*57G>C,ENSMUST00000110011:c.*57G>C,ENSMUST00000020718:c.*228G>C	NA	NA	11qA1	NA	NA	-	CTGGGAGGTGCCGGTGCTGGG	chr11	3517620	GTGxCGG	C	G	66_S3_L001_R1_001	64_Jiri_S1_L001_R1_001	0	NOVEL	COVERED	0.58293	0.58293	0.999999	0.999999	0.999855	62	0	6.83465	9.0863	4.18473	4.55695	0.192308	0.02	-0.226133
ACR_S9_1	chr11	29451063	29451063	T	G	exonic	Ccdc88a	NA	nonsynonymous SNV	Ccdc88a:NM_176841:exon9:c.T842G:p.L281R	exonic	Ccdc88a	NA	nonsynonymous SNV	Ccdc88a:uc007igw.2:exon9:c.T842G:p.L281R	exonic	ENSMUSG00000032740	NA	nonsynonymous SNV	ENSMUSG00000032740:ENSMUST00000040182:exon9:c.T842G:p.L281R	11qA3.3	NA	NA	+	AAACAAGAACTTGAGCAAATA	chr11	29451063	AACxTGA	T	G	66_S3_L001_R1_001	64_Jiri_S1_L001_R1_001	0	NOVEL	COVERED	0.994422	0.994422	1	1	1	161	0	-1.98166	8.89982	6.21185	8.28129	0.092308	0.02	0.824939
ACR_S9_1	chr11	63888565	63888565	T	A	UTR3	Hs3st3b1	NM_018805:c.*562A>T	NA	NA	UTR3	Hs3st3b1	uc007jkn.1:c.*562A>T	NA	NA	UTR3	ENSMUSG00000070407	ENSMUST00000094103:c.*562A>T	NA	NA	11qB3	NA	NA	-	AGTGTTTGCATACACTTCCAG	chr11	63888565	GCAxACA	T	A	66_S3_L001_R1_001	64_Jiri_S1_L001_R1_001	0	NOVEL	COVERED	0.99993	0.99993	1	1	1	160	0	-12.8295	7.20712	5.92007	1.1424	0.052632	0.02	0.659522
ACR_S9_1	chr11	67789528	67789528	C	T	intergenic	Glp2r,Dhrs7c	dist=18375;dist=8743	NA	NA	intergenic	Glp2r,Dhrs7c	dist=18375;dist=8743	NA	NA	exonic	ENSMUSG00000097886	NA	nonsynonymous SNV	ENSMUSG00000097886:ENSMUST00000181566:exon5:c.C788T:p.A263V	11qB3	NA	NA	NA	CAAACAGGAGCGACTCCCCAT	chr11	67789528	GAGxGAC	C	T	66_S3_L001_R1_001	64_Jiri_S1_L001_R1_001	0	NOVEL	COVERED	0.973965	0.973965	1	1	1	123	0	-0.214758	8.25455	0	8.79848	0.096154	0.02	0.930798
ACR_S9_1	chr11	69223275	69223275	A	T	intronic	Gucy2e	NA	NA	NA	intronic	Gucy2e	NA	NA	NA	intronic	ENSMUSG00000020890	NA	NA	NA	11qB3	NA	NA	-	GGCTGGCGCCACAGAGGCGCC	chr11	69223275	GCCxCAG	A	T	66_S3_L001_R1_001	64_Jiri_S1_L001_R1_001	0	NOVEL	COVERED	0.987943	0.987943	1	1	1	119	0	-2.25169	8.06566	3.33372	4.69571	0.084746	0.02	0.974167
ACR_S9_1	chr11	69223277	69223277	A	T	intronic	Gucy2e	NA	NA	NA	intronic	Gucy2e	NA	NA	NA	intronic	ENSMUSG00000020890	NA	NA	NA	11qB3	NA	NA	-	CTGGCGCCACAGAGGCGCCAG	chr11	69223277	CACxGAG	A	T	66_S3_L001_R1_001	64_Jiri_S1_L001_R1_001	0	NOVEL	COVERED	0.986153	0.986153	1	1	1	117	0	-2.15312	7.90524	3.23444	4.63493	0.086207	0.02	0.982918
ACR_S9_1	chr11	69778442	69778442	C	G	exonic	Zbtb4	NA	nonsynonymous SNV	Zbtb4:NM_029348:exon4:c.C1990G:p.P664A	exonic	Zbtb4	NA	nonsynonymous SNV	Zbtb4:uc007jrm.2:exon4:c.C1990G:p.P664A,Zbtb4:uc007jrn.2:exon4:c.C1990G:p.P664A	exonic	ENSMUSG00000018750	NA	nonsynonymous SNV	ENSMUSG00000018750:ENSMUST00000108639:exon4:c.C1990G:p.P664A,ENSMUSG00000018750:ENSMUST00000108640:exon4:c.C1990G:p.P664A	11qB3	NA	NA	+	CAGTGGACTGCCCCGAGGACG	chr11	69778442	CTGxCCC	C	G	66_S3_L001_R1_001	64_Jiri_S1_L001_R1_001	0	NOVEL	COVERED	0.851984	0.851984	1	1	1	88	0	19.8194	21.529	11.9252	20.0592	0.27027	0.02	-0.331341
ACR_S9_1	chr11	70009533	70009533	C	T	exonic	Dvl2	NA	nonsynonymous SNV	Dvl2:NM_007888:exon15:c.C2152T:p.R718C	exonic	Dvl2	NA	nonsynonymous SNV	Dvl2:uc007jtm.1:exon15:c.C2152T:p.R718C	exonic	ENSMUSG00000020888	NA	nonsynonymous SNV	ENSMUSG00000020888:ENSMUST00000019362:exon15:c.C2152T:p.R718C,ENSMUSG00000020888:ENSMUST00000102575:exon15:c.C2152T:p.R718C	11qB3	NA	NA	+	GACAGCTAGCCGTCAGAGCTT	chr11	70009533	AGCxGTC	C	T	66_S3_L001_R1_001	E210_S1	0	NOVEL	COVERED	0.999993	0.999993	1	1	0.999974	148	0	-13.1103	8.6863	9.06195	0	0.056604	0.02	2.03795
ACR_S9_1	chr11	76417424	76417424	C	T	UTR3	Abr	NM_198018:c.*1680G>A,NM_001291186:c.*1680G>A,NM_198895:c.*1680G>A,NM_198894:c.*1680G>A	NA	NA	UTR3	Abr	uc007kfr.1:c.*1680G>A,uc007kfs.1:c.*1680G>A,uc007kft.1:c.*1680G>A,uc007kfu.1:c.*1680G>A	NA	NA	UTR3	ENSMUSG00000017631	ENSMUST00000094012:c.*1680G>A,ENSMUST00000072740:c.*1680G>A,ENSMUST00000108407:c.*1680G>A,ENSMUST00000065028:c.*1680G>A	NA	NA	11qB5	NA	NA	-	GCATGCCATCCTCCTGCATAA	chr11	76417424	ATCxTCC	C	T	66_S3_L001_R1_001	64_Jiri_S1_L001_R1_001	0	NOVEL	COVERED	0.993703	0.993703	1	1	1	154	0	-2.15434	8.73801	9.54641	0	0.092308	0.02	0.931303
ACR_S9_1	chr11	77534990	77534990	T	A	UTR3	Taok1	NM_144825:c.*2877A>T	NA	NA	UTR3	Taok1	uc007khc.1:c.*2877A>T	NA	NA	UTR3	ENSMUSG00000017291	ENSMUST00000058496:c.*2877A>T,ENSMUST00000017435:c.*2877A>T	NA	NA	11qB5	NA	NA	-	TTTGCATTTTTAAAATGCTGA	chr11	77534990	TTTxAAA	T	A	66_S3_L001_R1_001	70_S7_L001_R1_001	0	NOVEL	COVERED	0.9982	0.9982	1	1	1	152	0	-4.16499	9.04511	2.73844	6.12074	0.081081	0.02	0.755219
ACR_S9_1	chr11	78324488	78324488	C	G	exonic	Aldoc	NA	synonymous SNV	Aldoc:NM_009657:exon1:c.C87G:p.G29G	exonic	Aldoc	NA	synonymous SNV	Aldoc:uc007kix.1:exon1:c.C87G:p.G29G,Aldoc:uc007kiw.1:exon2:c.C87G:p.G29G	exonic	ENSMUSG00000017390	NA	synonymous SNV	ENSMUSG00000017390:ENSMUST00000102478:exon1:c.C87G:p.G29G,ENSMUSG00000017390:ENSMUST00000017534:exon2:c.C87G:p.G29G	11qB5	NA	NA	+	CCGGCAAGGGCATTCTGGCTG	chr11	78324488	GGGxATT	C	G	66_S3_L001_R1_001	64_Jiri_S1_L001_R1_001	0	NOVEL	COVERED	0.490492	0.490544	0.999892	0.999892	0.987855	46	0	15.0164	15.8022	4.28483	11.622	0.304348	0.02	-0.201641
ACR_S9_1	chr11	86993694	86993694	C	G	ncRNA_intronic	Mir8115	NA	NA	NA	ncRNA_intronic	Mir8115	NA	NA	NA	UTR5	ENSMUSG00000018427	ENSMUST00000018571:c.-21769G>C	NA	NA	11qC	NA	NA	+	GCTCTTAAAGCCACAGTCTCC	chr11	86993694	AAGxCAC	C	G	66_S3_L001_R1_001	64_Jiri_S1_L001_R1_001	0	NOVEL	COVERED	0.967425	0.967425	1	1	1	105	0	17.4612	21.0704	18.2376	9.5573	0.230769	0.02	1.14457
ACR_S9_1	chr11	94124240	94124240	T	A	UTR3	Spag9	NM_001199203:c.*1403T>A,NM_027569:c.*1403T>A,NM_001199204:c.*1403T>A,NM_001199205:c.*1403T>A,NM_001025429:c.*1403T>A,NM_001025430:c.*1403T>A,NM_001025428:c.*1403T>A	NA	NA	ncRNA_intronic	BC096410	NA	NA	NA	UTR3	ENSMUSG00000020859	ENSMUST00000041956:c.*1403T>A,ENSMUST00000092777:c.*1403T>A,ENSMUST00000075695:c.*1403T>A,ENSMUST00000103168:c.*1403T>A,ENSMUST00000024979:c.*1403T>A,ENSMUST00000153076:c.*1403T>A	NA	NA	11qD	NA	NA	+	GTACGGGGGATTTCCCCCGGA	chr11	94124240	GGAxTTC	T	A	66_S3_L001_R1_001	64_Jiri_S1_L001_R1_001	0	NOVEL	COVERED	0.999999	0.999999	1	1	1	289	0	-16.1955	9.6674	5.23217	4.35359	0.056	0.02	1.71201
ACR_S9_1	chr11	94124241	94124241	T	A	UTR3	Spag9	NM_001199203:c.*1404T>A,NM_027569:c.*1404T>A,NM_001199204:c.*1404T>A,NM_001199205:c.*1404T>A,NM_001025429:c.*1404T>A,NM_001025430:c.*1404T>A,NM_001025428:c.*1404T>A	NA	NA	ncRNA_intronic	BC096410	NA	NA	NA	UTR3	ENSMUSG00000020859	ENSMUST00000041956:c.*1404T>A,ENSMUST00000092777:c.*1404T>A,ENSMUST00000075695:c.*1404T>A,ENSMUST00000103168:c.*1404T>A,ENSMUST00000024979:c.*1404T>A,ENSMUST00000153076:c.*1404T>A	NA	NA	11qD	NA	NA	+	TACGGGGGATTTCCCCCGGAC	chr11	94124241	GATxTCC	T	A	66_S3_L001_R1_001	64_Jiri_S1_L001_R1_001	0	NOVEL	COVERED	0.999999	0.999999	1	1	1	289	0	-15.7584	9.79311	5.23261	4.48677	0.056452	0.02	1.72152
ACR_S9_1	chr11	96367873	96367873	G	C	UTR3	Hoxb1	NM_008266:c.*734G>C	NA	NA	UTR3	Hoxb1	uc007lbz.2:c.*734G>C	NA	NA	UTR3	ENSMUSG00000018973	ENSMUST00000019117:c.*734G>C	NA	NA	11qD	NA	NA	+	CTTCCCACTGGCATCACAAAA	chr11	96367873	CTGxCAT	G	C	66_S3_L001_R1_001	64_Jiri_S1_L001_R1_001	0	NOVEL	COVERED	1	1	1	1	1	718	0	-72.302	14.5174	2.33175	12.8323	0.032787	0.02	7.25751
ACR_S9_1	chr11	97501037	97501037	C	G	exonic	Arhgap23	NA	nonsynonymous SNV	Arhgap23:NM_021493:exon19:c.C3746G:p.A1249G	exonic	Arhgap23	NA	nonsynonymous SNV	Arhgap23:uc007led.1:exon5:c.C890G:p.A297G,Arhgap23:uc007lec.1:exon19:c.C3746G:p.A1249G	exonic	ENSMUSG00000049807	NA	nonsynonymous SNV	ENSMUSG00000049807:ENSMUST00000093940:exon3:c.C890G:p.A297G,ENSMUSG00000049807:ENSMUST00000107601:exon19:c.C3746G:p.A1249G,ENSMUSG00000049807:ENSMUST00000121799:exon24:c.C4379G:p.A1460G	11qD	NA	NA	+	GCCTCATCCGCCGCATCACTG	chr11	97501037	CCGxCGC	C	G	66_S3_L001_R1_001	64_Jiri_S1_L001_R1_001	0	NOVEL	COVERED	0.522161	0.522161	1	1	0.999974	62	0	5.28896	7.81642	6.50208	1.51655	0.166667	0.02	-0.210388
ACR_S9_1	chr11	97711213	97711213	T	C	exonic	Psmb3	NA	synonymous SNV	Psmb3:NM_011971:exon4:c.T408C:p.F136F	exonic	Psmb3	NA	synonymous SNV	Psmb3:uc007lep.1:exon4:c.T408C:p.F136F	exonic	ENSMUSG00000069744	NA	synonymous SNV	ENSMUSG00000069744:ENSMUST00000103147:exon4:c.T408C:p.F136F	11qD	NA	NA	+	CTGATGACTTTGTAGTCAGTG	chr11	97711213	CTTxGTA	T	C	66_S3_L001_R1_001	64_Jiri_S1_L001_R1_001	0	NOVEL	COVERED	0.990964	0.990964	1	1	1	146	3	-2.56392	7.57445	5.44641	3.98055	0.096774	0.02	0.957461
ACR_S9_1	chr11	98454940	98454940	C	T	exonic	Grb7	NA	nonsynonymous SNV	Grb7:NM_010346:exon15:c.C1543T:p.H515Y	exonic	Grb7	NA	nonsynonymous SNV	Grb7:uc011yeb.1:exon14:c.C940T:p.H314Y,Grb7:uc007lgk.1:exon15:c.C1543T:p.H515Y	exonic	ENSMUSG00000019312	NA	nonsynonymous SNV	ENSMUSG00000019312:ENSMUST00000019456:exon15:c.C1543T:p.H515Y	11qD	NA	NA	+	GGTAGAATTCCACCAGCTGAA	chr11	98454940	TTCxACC	C	T	66_S3_L001_R1_001	64_Jiri_S1_L001_R1_001	0	NOVEL	COVERED	0.851984	0.851984	1	1	0.999992	77	0	1.48587	7.11285	6.01218	1.29814	0.108108	0.02	-0.332689
ACR_S9_1	chr11	101260776	101260776	C	G	exonic	Wnk4	NA	synonymous SNV	Wnk4:NM_175638:exon1:c.C105G:p.R35R	exonic	Wnk4	NA	synonymous SNV	Wnk4:uc007loe.2:exon1:c.C105G:p.R35R	exonic	ENSMUSG00000035112	NA	synonymous SNV	ENSMUSG00000035112:ENSMUST00000103108:exon1:c.C105G:p.R35R,ENSMUSG00000035112:ENSMUST00000139487:exon1:c.C105G:p.R35R,ENSMUSG00000035112:ENSMUST00000147741:exon1:c.C105G:p.R35R	11qD	NA	NA	+	GGCCGACCCGCCTGGGGCCAC	chr11	101260776	CCGxCTG	C	G	66_S3_L001_R1_001	64_Jiri_S1_L001_R1_001	0	NOVEL	COVERED	0.229141	0.229173	0.999859	0.999859	0	33	0	8.19516	8.93201	4.29057	4.6928	0.266667	0.02	-0.131493
ACR_S9_1	chr11	101288501	101288501	T	G	UTR3	Becn1,Cntd1	NM_019584:c.*312A>C;NM_026562:c.*920T>G	NA	NA	UTR3	Becn1,Cntd1	uc007loj.1:c.*312A>C,uc007lok.1:c.*312A>C,uc007lol.1:c.*312A>C;uc007loi.1:c.*920T>G	NA	NA	UTR3	ENSMUSG00000035086,ENSMUSG00000078653	ENSMUST00000130916:c.*312A>C,ENSMUST00000041403:c.*1409A>C,ENSMUST00000172233:c.*454A>C;ENSMUST00000103107:c.*920T>G	NA	NA	11qD	NA	NA	NA	GTGCAGGAAGTTGAGAGAGAT	chr11	101288501	AAGxTGA	T	G	66_S3_L001_R1_001	64_Jiri_S1_L001_R1_001	0	NOVEL	COVERED	0.99994	0.99994	1	1	1	174	0	2.73472	17.6651	18.2209	0	0.104167	0.02	0.75652
ACR_S9_1	chr11	106996299	106996299	A	T	intronic	Kpna2	NA	NA	NA	intronic	Kpna2	NA	NA	NA	UTR3	ENSMUSG00000018362	ENSMUST00000106768:c.*180T>A	NA	NA	11qE1	NA	NA	-	TATCACACACAAGGCCCTAGT	chr11	106996299	CACxAGG	A	T	66_S3_L001_R1_001	64_Jiri_S1_L001_R1_001	0	NOVEL	COVERED	0.934492	0.934492	1	1	1	96	0	4.62592	10.7374	0	11.7615	0.130435	0.02	-0.403251
ACR_S9_1	chr11	106996303	106996303	C	G	intronic	Kpna2	NA	NA	NA	intronic	Kpna2	NA	NA	NA	UTR3	ENSMUSG00000018362	ENSMUST00000106768:c.*176G>C	NA	NA	11qE1	NA	NA	-	ACACACAAGGCCCTAGTGTGT	chr11	106996303	AGGxCCT	C	G	66_S3_L001_R1_001	64_Jiri_S1_L001_R1_001	0	NOVEL	COVERED	0.948402	0.948402	1	1	1	99	0	4.11462	10.633	0	11.6832	0.125	0.02	-0.418846
ACR_S9_1	chr11	115281661	115281661	C	G	intergenic	Fdxr,Fads6	dist=4692;dist=1705	NA	NA	intergenic	Fdxr,Fads6	dist=4692;dist=1705	NA	NA	UTR3	ENSMUSG00000044788	ENSMUST00000056153:c.*1845G>C	NA	NA	11qE2	NA	NA	NA	CCAGCGGCTGCCCCGGAATGA	chr11	115281661	CTGxCCC	C	G	66_S3_L001_R1_001	64_Jiri_S1_L001_R1_001	0	NOVEL	COVERED	0.996233	0.996233	1	1	1	152	0	19.7622	25.137	23.227	4.20299	0.2	0.02	1.00468
ACR_S9_1	chr11	116600550	116600550	C	G	intronic	Rhbdf2	NA	NA	NA	intronic	Rhbdf2	NA	NA	NA	intronic	ENSMUSG00000020806	NA	NA	NA	11qE2	NA	NA	-	CAAGCCAAGTCTGAGGCTTCC	chr11	116600550	AGTxTGA	C	G	66_S3_L001_R1_001	64_Jiri_S1_L001_R1_001	0	NOVEL	COVERED	0.877708	0.877708	1	1	0.999912	77	0	23.378	24.8124	15.7144	8.96777	0.3	0.02	-0.350632
ACR_S9_1	chr11	118165552	118165552	T	A	UTR3	Cyth1	NM_001112700:c.*464A>T,NM_011180:c.*464A>T,NM_001112699:c.*464A>T	NA	NA	UTR3	Cyth1	uc007mor.2:c.*464A>T,uc033gbr.1:c.*464A>T,uc011yil.1:c.*464A>T,uc033gbs.1:c.*464A>T	NA	NA	UTR3	ENSMUSG00000017132	ENSMUST00000106305:c.*464A>T,ENSMUST00000106302:c.*464A>T,ENSMUST00000017276:c.*464A>T	NA	NA	11qE2	NA	NA	-	GAGGGCAGAGTACAGTGCTAC	chr11	118165552	GAGxACA	T	A	66_S3_L001_R1_001	64_Jiri_S1_L001_R1_001	0	NOVEL	COVERED	0.995687	0.995687	1	1	1	137	0	14.3548	21.2578	10.8487	11.9613	0.166667	0.02	0.905245
ACR_S9_1	chr11	119374835	119374835	T	A	exonic	Slc26a11	NA	synonymous SNV	Slc26a11:NM_178743:exon12:c.T1173A:p.A391A	exonic	Slc26a11	NA	synonymous SNV	Slc26a11:uc007mqn.1:exon7:c.T657A:p.A219A,Slc26a11:uc007mqm.1:exon12:c.T1173A:p.A391A	exonic	ENSMUSG00000039908	NA	synonymous SNV	ENSMUSG00000039908:ENSMUST00000050880:exon12:c.T1173A:p.A391A	11qE2	NA	NA	+	CTGCCCTGGCTGCCGTGATCA	chr11	119374835	GGCxGCC	T	A	66_S3_L001_R1_001	64_Jiri_S1_L001_R1_001	0	NOVEL	COVERED	0.865745	0.865745	1	1	0.999912	76	0	1.38999	7.01376	8.16434	3.29881	0.108108	0.02	-0.341658
ACR_S9_1	chr11	120104678	120104678	A	G	UTR3	Slc38a10	NM_001164799:c.*319T>C,NM_001164800:c.*319T>C,NM_001164798:c.*319T>C,NM_024249:c.*319T>C	NA	NA	UTR3	Slc38a10	uc007mrv.2:c.*319T>C,uc007mrx.2:c.*319T>C,uc007mrw.2:c.*319T>C,uc007mry.2:c.*319T>C	NA	NA	UTR3	ENSMUSG00000061306	ENSMUST00000103018:c.*319T>C,ENSMUST00000045402:c.*319T>C,ENSMUST00000179094:c.*319T>C	NA	NA	11qE2	NA	NA	-	TGGCAACTTCAAAGTTGCCTG	chr11	120104678	TTCxAAG	A	G	66_S3_L001_R1_001	64_Jiri_S1_L001_R1_001	0	NOVEL	COVERED	0.739671	0.739671	1	1	0.999992	73	0	2.90272	6.80455	6.40175	0.872304	0.133333	0.02	-0.271329
ACR_S9_1	chr11	120537282	120537282	G	C	intronic	Gcgr	NA	NA	NA	intronic	Gcgr	NA	NA	NA	intronic	ENSMUSG00000025127	NA	NA	NA	11qE2	NA	NA	+	CTGGAGAGTGGCATCCCCCCC	chr11	120537282	GTGxCAT	G	C	66_S3_L001_R1_001	64_Jiri_S1_L001_R1_001	0	NOVEL	COVERED	0.717314	0.717315	0.999997	0.999997	0.999693	63	0	2.38252	6.54537	1.51667	7.2737	0.129032	0.02	-0.271668
ACR_S9_1	chr12	8016390	8016390	T	G	exonic	Apob	NA	nonsynonymous SNV	Apob:NM_009693:exon29:c.T13358G:p.F4453C	exonic	Apob	NA	nonsynonymous SNV	Apob:uc007mzf.2:exon29:c.T13358G:p.F4453C	exonic	ENSMUSG00000020609	NA	nonsynonymous SNV	ENSMUSG00000020609:ENSMUST00000037520:exon28:c.T13259G:p.F4420C,ENSMUSG00000020609:ENSMUST00000037811:exon29:c.T13358G:p.F4453C	12qA1.1	NA	NA	+	TATGAAAAATTTGTTGGTGAG	chr12	8016390	AATxTGT	T	G	66_S3_L001_R1_001	64_Jiri_S1_L001_R1_001	0	NOVEL	COVERED	0.999978	0.999978	1	1	1	188	0	14.7867	27.216	14.5398	14.7045	0.145631	0.02	2.19475
ACR_S9_1	chr12	27336159	27336159	A	T	UTR3	Sox11	NM_009234:c.*5062T>A	NA	NA	UTR3	Sox11	uc007nfn.2:c.*5062T>A	NA	NA	intergenic	ENSMUSG00000094002,ENSMUSG00000063632	dist=175526;dist=4538	NA	NA	12qA2	NA	NA	-	TTTGATCAAAATTCTTTTTAC	chr12	27336159	AAAxTTC	A	T	66_S3_L001_R1_001	64_Jiri_S1_L001_R1_001	0	NOVEL	COVERED	1	1	1	1	1	326	0	47.1905	64.9669	60.4372	4.95761	0.181818	0.02	2.83557
ACR_S9_1	chr12	31074577	31074577	T	A	exonic	Fam110c	NA	synonymous SNV	Fam110c:NM_027828:exon1:c.T537A:p.V179V	exonic	Fam110c	NA	synonymous SNV	Fam110c:uc007nhb.1:exon1:c.T537A:p.V179V,Fam110c:uc033gcy.1:exon1:c.T537A:p.V179V	exonic	ENSMUSG00000036136	NA	synonymous SNV	ENSMUSG00000036136:ENSMUST00000041133:exon1:c.T537A:p.V179V	12qA2	NA	NA	+	CAACCCCTGTTGTAGCCGTGA	chr12	31074577	TGTxGTA	T	A	66_S3_L001_R1_001	E210_S1	0	NOVEL	COVERED	1	1	1	1	1	473	87	-26.3154	10.8729	7.15762	5.56808	0.064516	0.02	2.83761
ACR_S9_1	chr12	41628854	41628854	A	C	intronic	Immp2l	NA	NA	NA	intronic	Immp2l	NA	NA	NA	intronic	ENSMUSG00000056899	NA	NA	NA	12qB1	NA	NA	+	TACTGTTCTTAACTTAAAATC	chr12	41628854	CTTxACT	A	C	66_S3_L001_R1_001	64_Jiri_S1_L001_R1_001	0	NOVEL	COVERED	1	1	1	1	1	1046	0	-63.141	46.984	16.1526	34.0391	0.060662	0.02	11.1908
ACR_S9_1	chr12	76799171	76799171	G	T	UTR3	Rab15	NM_134050:c.*1072C>A	NA	NA	UTR3	Rab15	uc007nyt.2:c.*1072C>A	NA	NA	UTR3	ENSMUSG00000021062	ENSMUST00000021459:c.*1072C>A	NA	NA	12qC3	NA	NA	-	TTCAGTGAAAGAGGAGTGGTT	chr12	76799171	AAAxAGG	G	T	66_S3_L001_R1_001	64_Jiri_S1_L001_R1_001	0	NOVEL	COVERED	0.760885	0.760887	0.999997	0.999997	0.999693	65	0	13.4706	15.4828	2.68912	12.4655	0.242424	0.02	-0.289181
ACR_S9_1	chr12	91824909	91824909	C	G	exonic	Sel1l	NA	nonsynonymous SNV	Sel1l:NM_001039089:exon10:c.G1027C:p.E343Q,Sel1l:NM_011344:exon10:c.G877C:p.E293Q	exonic	Sel1l	NA	nonsynonymous SNV	Sel1l:uc007okx.1:exon10:c.G877C:p.E293Q,Sel1l:uc007oky.1:exon10:c.G1027C:p.E343Q,Sel1l:uc007okz.1:exon10:c.G1027C:p.E343Q	exonic	ENSMUSG00000020964	NA	nonsynonymous SNV	ENSMUSG00000020964:ENSMUST00000021347:exon10:c.G1027C:p.E343Q,ENSMUSG00000020964:ENSMUST00000167466:exon10:c.G877C:p.E293Q,ENSMUSG00000020964:ENSMUST00000178462:exon10:c.G877C:p.E293Q	12qD3	NA	NA	-	CCCGGGTTTTCCACTTCATCG	chr12	91824909	TTTxCAC	C	G	66_S3_L001_R1_001	64_Jiri_S1_L001_R1_001	0	NOVEL	COVERED	0.668432	0.668523	0.999863	0.999863	0.983538	49	0	16.5888	17.9003	10.8816	6.77864	0.275862	0.02	-0.254263
ACR_S9_1	chr12	100207565	100207565	C	G	UTR3	Calm1	NM_009790:c.*1137C>G	NA	NA	UTR3	Calm1	uc007osq.1:c.*1137C>G	NA	NA	UTR3	ENSMUSG00000001175	ENSMUST00000110082:c.*1137C>G,ENSMUST00000001204:c.*1137C>G	NA	NA	12qE	NA	NA	+	CAGACTAGAGCCCTGGTGAGA	chr12	100207565	GAGxCCT	C	G	66_S3_L001_R1_001	64_Jiri_S1_L001_R1_001	0	NOVEL	COVERED	0.997163	0.997163	1	1	1	134	0	7.37046	16.5103	12.7517	5.59455	0.130435	0.02	0.878249
ACR_S9_1	chr12	108351337	108351337	G	C	intronic	Cyp46a1	NA	NA	NA	intronic	Cyp46a1	NA	NA	NA	intronic	ENSMUSG00000021259	NA	NA	NA	12qF1	NA	NA	+	GGTGGTGCTGGCTGGTGGGGG	chr12	108351337	CTGxCTG	G	C	66_S3_L001_R1_001	64_Jiri_S1_L001_R1_001	0	NOVEL	UNCOVERED	0.120419	0.120436	0.999859	0.999859	0	29	0	8.89912	9.07804	2.24771	6.65797	0.363636	0.02	-0.096371
ACR_S9_1	chr12	111263506	111263506	G	C	UTR3	Traf3	NM_011632:c.*1446G>C,NM_001286122:c.*1446G>C	NA	NA	UTR3	Traf3	uc007pcl.2:c.*1446G>C,uc007pcn.2:c.*1446G>C,uc007pco.2:c.*1446G>C	NA	NA	UTR3	ENSMUSG00000021277	ENSMUST00000117269:c.*1446G>C,ENSMUST00000021706:c.*1446G>C,ENSMUST00000060274:c.*1446G>C	NA	NA	12qF1	NA	NA	+	AAGCGTTCCCGAGACCACTGG	chr12	111263506	CCCxAGA	G	C	66_S3_L001_R1_001	64_Jiri_S1_L001_R1_001	0	NOVEL	COVERED	0.954491	0.954491	1	1	0.999994	92	0	-2.1614	6.51002	0	7.12062	0.081633	0.02	-0.428146
ACR_S9_1	chr13	11737736	11737736	G	C	exonic	Ryr2	NA	nonsynonymous SNV	Ryr2:NM_023868:exon37:c.C5698G:p.P1900A	exonic	Ryr2	NA	nonsynonymous SNV	Ryr2:uc007pld.1:exon37:c.C5698G:p.P1900A	exonic	ENSMUSG00000021313	NA	nonsynonymous SNV	ENSMUSG00000021313:ENSMUST00000021750:exon37:c.C5698G:p.P1900A,ENSMUSG00000021313:ENSMUST00000170156:exon37:c.C5698G:p.P1900A	13qA1	NA	NA	-	AGTTTAACTGGCTCCGGGAGT	chr13	11737736	CTGxCTC	G	C	66_S3_L001_R1_001	64_Jiri_S1_L001_R1_001	0	NOVEL	COVERED	0.999956	0.999956	1	1	1	201	0	-2.75765	13.8252	2.39891	13.172	0.084211	0.02	0.741136
ACR_S9_1	chr13	23683850	23683850	C	G	exonic	Hist1h2ac	NA	nonsynonymous SNV	Hist1h2ac:NM_178189:exon1:c.G68C:p.G23A	exonic	Hist1h2ac	NA	nonsynonymous SNV	Hist1h2ac:uc007puk.1:exon1:c.G68C:p.G23A	exonic	ENSMUSG00000069270	NA	nonsynonymous SNV	ENSMUSG00000069270:ENSMUST00000171127:exon1:c.G68C:p.G23A	13qA3.1	NA	NA	-	GAACTGCAGGCCGGCCCGGGA	chr13	23683850	AGGxCGG	C	G	66_S3_L001_R1_001	64_Jiri_S1_L001_R1_001	0	NOVEL	COVERED	1	1	1	1	1	281	9	28.4338	42.8436	24.0146	23.0483	0.166667	0.02	1.86697
ACR_S9_1	chr13	26768300	26768300	A	C	UTR3	Hdgfl1	NM_008232:c.*937T>G	NA	NA	UTR3	Hdgfl1	uc007pxa.2:c.*937T>G	NA	NA	UTR3	ENSMUSG00000045835	ENSMUST00000055915:c.*937T>G	NA	NA	13qA3.1	NA	NA	-	AAGGGGAAAGAGCAGGGCCAA	chr13	26768300	AAGxGCA	A	C	66_S3_L001_R1_001	64_Jiri_S1_L001_R1_001	0	NOVEL	COVERED	1	1	1	1	1	1622	0	-85.035	34.9165	3.63284	32.0268	0.070853	0.02	7.9033
ACR_S9_1	chr13	55507424	55507424	T	C	intronic	Pdlim7	NA	NA	NA	UTR5;UTR3	Pdlim7;Pdlim7	uc007qrh.3:c.-36A>G;uc007qrl.3:c.*522A>G	NA	NA	UTR3	ENSMUSG00000021493	ENSMUST00000131306:c.*522A>G	NA	NA	13qB1	NA	NA	-	CAGCCATGAGTCCTGGCAAAG	chr13	55507424	GAGxCCT	T	C	66_S3_L001_R1_001	64_Jiri_S1_L001_R1_001	0	NOVEL	UNCOVERED	0.119761	0.120436	0.994391	0.994391	0	24	0	7.25974	7.45395	8.90066	0	0.363636	0.02	-0.096008
ACR_S9_1	chr13	74360792	74360792	A	G	exonic	Lrrc14b	NA	synonymous SNV	Lrrc14b:NM_001033042:exon2:c.T1495C:p.L499L	exonic	Lrrc14b	NA	synonymous SNV	Lrrc14b:uc007rfe.1:exon2:c.T1495C:p.L499L	exonic	ENSMUSG00000021579	NA	synonymous SNV	ENSMUSG00000021579:ENSMUST00000022064:exon2:c.T1495C:p.L499L	13qC1	NA	NA	-	AAGTTTTCCAAAGCAGTTTTG	chr13	74360792	CCAxAGC	A	G	66_S3_L001_R1_001	E210_S1	0	NOVEL	COVERED	0.997553	0.997553	1	1	0.999994	115	0	-5.75686	8.01708	9.18202	0	0.069444	0.02	0.869022
ACR_S9_1	chr13	108270637	108270637	T	G	exonic	Elovl7	NA	nonsynonymous SNV	Elovl7:NM_029001:exon4:c.T260G:p.V87G	exonic	Elovl7	NA	nonsynonymous SNV	Elovl7:uc007rva.2:exon4:c.T260G:p.V87G	exonic	ENSMUSG00000021696	NA	nonsynonymous SNV	ENSMUSG00000021696:ENSMUST00000022207:exon4:c.T260G:p.V87G	13qD2.1	NA	NA	+	TTCCAGTTTGTGATGTCTGGC	chr13	108270637	TTGxGAT	T	G	66_S3_L001_R1_001	64_Jiri_S1_L001_R1_001	0	NOVEL	COVERED	0.999487	0.999487	1	1	1	157	0	21.9159	29.1094	22.248	20.1503	0.195122	0.02	0.773653
ACR_S9_1	chr14	12536255	12536255	G	T	intronic	Cadps	NA	NA	NA	intronic	Cadps	NA	NA	NA	intronic	ENSMUSG00000054423	NA	NA	NA	14qA1	NA	NA	-	TCAAAAGCATGCATTCATACT	chr14	12536255	CATxCAT	G	T	66_S3_L001_R1_001	64_Jiri_S1_L001_R1_001	0	NOVEL	COVERED	0.351961	0.353947	0.994391	0.994391	0	32	0	6.18823	7.47025	7.47025	0	0.222222	0.02	-0.166553
ACR_S9_1	chr14	21845622	21845622	G	T	UTR3	Vdac2	NM_011695:c.*385G>T	NA	NA	UTR3	Vdac2	uc007sls.1:c.*385G>T	NA	NA	UTR3	ENSMUSG00000021771	ENSMUST00000022293:c.*385G>T	NA	NA	14qA3	NA	NA	+	ATTTTTTTTTGTTATATTCAC	chr14	21845622	TTTxTTA	G	T	66_S3_L001_R1_001	E210_S1	0	NOVEL	COVERED	0.851982	0.851984	0.999997	0.999997	0.999693	70	0	4.46338	8.13387	8.89199	0	0.184211	0.02	-0.331087
ACR_S9_1	chr14	31523173	31523173	A	C	UTR3	Colq	NM_009937:c.*1237T>G	NA	NA	UTR3	Colq	uc007sxv.2:c.*1237T>G	NA	NA	UTR3	ENSMUSG00000057606	ENSMUST00000112027:c.*1237T>G,ENSMUST00000150054:c.*1237T>G	NA	NA	14qB	NA	NA	-	CTGCCTGTGAAGACAGCCTCA	chr14	31523173	TGAxGAC	A	C	66_S3_L001_R1_001	64_Jiri_S1_L001_R1_001	0	NOVEL	COVERED	0.92664	0.92664	1	1	0.999992	86	0	13.1247	16.1417	10.3867	8.78299	0.227273	0.02	-0.3853
ACR_S9_1	chr14	34747585	34747585	T	A	UTR3	Wapal	NM_001004436:c.*1895T>A,NM_001301330:c.*1895T>A	NA	NA	intergenic	Wapal,Grid1	dist=1368;dist=72551	NA	NA	UTR3	ENSMUSG00000041408	ENSMUST00000048263:c.*1895T>A	NA	NA	14qB	NA	NA	+	TGTTTTGTTTTTAAAATACTA	chr14	34747585	TTTxTAA	T	A	66_S3_L001_R1_001	64_Jiri_S1_L001_R1_001	0	NOVEL	COVERED	1	1	1	1	1	310	0	10.6294	29.2964	19.1101	12.0793	0.125	0.02	1.74754
ACR_S9_1	chr14	48121170	48121170	G	C	exonic	Peli2	NA	nonsynonymous SNV	Peli2:NM_033602:exon1:c.G14C:p.G5A	exonic	Peli2	NA	nonsynonymous SNV	Peli2:uc007tjh.1:exon1:c.G14C:p.G5A	exonic	ENSMUSG00000021846	NA	nonsynonymous SNV	ENSMUSG00000021846:ENSMUST00000073150:exon1:c.G14C:p.G5A	14qC1	NA	NA	+	TTTTCCCCGGGCCAGGAGGAA	chr14	48121170	CGGxCCA	G	C	66_S3_L001_R1_001	64_Jiri_S1_L001_R1_001	0	NOVEL	COVERED	1	1	1	1	1	850	0	-18.4223	51.0297	31.7635	30.7664	0.083544	0.02	8.84557
ACR_S9_1	chr14	63819327	63819327	T	G	exonic	Xkr6	NA	nonsynonymous SNV	Xkr6:NM_173393:exon3:c.T1454G:p.I485S	exonic	Xkr6	NA	nonsynonymous SNV	Xkr6:uc007uhu.2:exon3:c.T1454G:p.I485S	exonic	ENSMUSG00000035067	NA	nonsynonymous SNV	ENSMUSG00000035067:ENSMUST00000119973:exon3:c.T1454G:p.I485S,ENSMUSG00000035067:ENSMUST00000120820:exon3:c.T686G:p.I229S	14qD1	NA	NA	+	GTGGCTGGGATTACGCTCATG	chr14	63819327	GGAxTAC	T	G	66_S3_L001_R1_001	64_Jiri_S1_L001_R1_001	0	NOVEL	COVERED	0.909069	0.909069	1	1	0.999999	91	0	5.9313	10.8593	3.34975	7.02815	0.146341	0.02	-0.376427
ACR_S9_1	chr14	69847705	69847705	G	A	intronic	Pebp4	NA	NA	NA	intronic	Pebp4	NA	NA	NA	intronic	ENSMUSG00000022085	NA	NA	NA	14qD2	NA	NA	+	AGCAGAGCAGGTAGGGTGGGA	chr14	69847705	CAGxTAG	G	A	66_S3_L001_R1_001	70_S7_L001_R1_001	0	NOVEL	UNCOVERED	0.043541	0.043787	0.994391	0.994391	0	20	0	21.3393	21.3315	9.22803	15.1795	1	0.02	-0.061361
ACR_S9_1	chr14	117979388	117979388	A	G	UTR3	Gpc6	NM_011821:c.*4302A>G,NM_001079844:c.*4302A>G	NA	NA	UTR3	Gpc6	uc007uyk.2:c.*4302A>G,uc007uyl.2:c.*4302A>G	NA	NA	UTR3	ENSMUSG00000058571	ENSMUST00000078849:c.*4302A>G	NA	NA	14qE4	NA	NA	+	ACTCATGTGCAGGATAAATGT	chr14	117979388	TGCxGGA	A	G	66_S3_L001_R1_001	64_Jiri_S1_L001_R1_001	0	NOVEL	COVERED	0.999999	0.999999	1	1	1	275	0	31.9385	40.7118	33.7169	8.06975	0.221311	0.02	1.73814
ACR_S9_1	chr15	27743984	27743984	C	G	exonic	Trio	NA	nonsynonymous SNV	Trio:NM_001081302:exon49:c.G7861C:p.V2621L	exonic	Trio	NA	nonsynonymous SNV	Trio:uc007vjv.1:exon3:c.G274C:p.V92L,Trio:uc007vjw.1:exon49:c.G7861C:p.V2621L	exonic	ENSMUSG00000022263	NA	nonsynonymous SNV	ENSMUSG00000022263:ENSMUST00000090247:exon49:c.G7861C:p.V2621L	15qB1	NA	NA	-	TCCATGATAACTGCACTCGTA	chr15	27743984	TAAxTGC	C	G	66_S3_L001_R1_001	64_Jiri_S1_L001_R1_001	0	NOVEL	COVERED	0.999978	0.999978	1	1	1	166	0	-5.74969	13.029	13.947	1.12889	0.07767	0.02	2.1946
ACR_S9_1	chr15	28408381	28408381	G	T	exonic	Dnah5	NA	nonsynonymous SNV	Dnah5:NM_133365:exon62:c.G10511T:p.S3504I	exonic	Dnah5	NA	nonsynonymous SNV	Dnah5:uc007vjy.1:exon62:c.G10511T:p.S3504I	exonic	ENSMUSG00000022262	NA	nonsynonymous SNV	ENSMUSG00000022262:ENSMUST00000067048:exon62:c.G10511T:p.S3504I	15qB1	NA	NA	+	ACGGAACAAAGTAAAGAGTTT	chr15	28408381	AAAxTAA	G	T	66_S3_L001_R1_001	64_Jiri_S1_L001_R1_001	0	NOVEL	COVERED	0.227464	0.229173	0.99254	0.99254	0	24	0	7.79402	8.53174	0	9.17687	0.266667	0.02	-0.131498
ACR_S9_1	chr15	31294010	31294010	A	G	UTR3	Ankrd33b	NM_001164441:c.*3139T>C,NM_027496:c.*3139T>C	NA	NA	UTR3	Ankrd33b	uc007vkd.3:c.*3139T>C,uc007vke.3:c.*3139T>C,uc011zru.2:c.*3139T>C,uc011zrv.2:c.*3139T>C	NA	NA	UTR3	ENSMUSG00000022237	ENSMUST00000110410:c.*3139T>C,ENSMUST00000123325:c.*3139T>C,ENSMUST00000156679:c.*4124T>C	NA	NA	15qB2	NA	NA	-	GTGGGTATGGATGGCCCATCT	chr15	31294010	TGGxTGG	A	G	66_S3_L001_R1_001	64_Jiri_S1_L001_R1_001	0	NOVEL	COVERED	1	1	1	1	1	255	0	-1.63774	21.145	19.4341	1.51791	0.094203	0.02	3.34738
ACR_S9_1	chr15	39566914	39566914	A	C	intronic	Rims2	NA	NA	NA	intronic	Rims2	NA	NA	NA	intronic	ENSMUSG00000037386	NA	NA	NA	15qB3.1	NA	NA	+	ATAAACATTAATTTTATGGGT	chr15	39566914	TTAxTTT	A	C	66_S3_L001_R1_001	64_Jiri_S1_L001_R1_001	0	NOVEL	COVERED	1	1	1	1	1	567	0	-55.2685	20.4379	12.6866	6.8313	0.046377	0.02	7.32801
ACR_S9_1	chr15	75551819	75551819	C	A	intergenic	9030619P08Rik,Ly6h	dist=119990;dist=12926	NA	NA	intergenic	9030619P08Rik,Ly6h	dist=119990;dist=12926	NA	NA	UTR3	ENSMUSG00000022577	ENSMUST00000126129:c.*1712G>T,ENSMUST00000163116:c.*1712G>T	NA	NA	15qD3	NA	NA	NA	ATCATTTGCTCTTTTTGTATC	chr15	75551819	GCTxTTT	C	A	66_S3_L001_R1_001	64_Jiri_S1_L001_R1_001	0	NOVEL	COVERED	0.998993	0.998993	1	1	0.999994	122	0	0.455416	12.5286	6.78168	12.1529	0.103896	0.02	0.825506
ACR_S9_1	chr15	79308786	79308786	G	C	exonic	Pla2g6	NA	nonsynonymous SNV	Pla2g6:NM_001199023:exon5:c.C680G:p.A227G,Pla2g6:NM_001199024:exon5:c.C680G:p.A227G,Pla2g6:NM_016915:exon5:c.C680G:p.A227G,Pla2g6:NM_001199025:exon6:c.C680G:p.A227G	exonic	Pla2g6	NA	nonsynonymous SNV	Pla2g6:uc007wtd.2:exon5:c.C680G:p.A227G,Pla2g6:uc007wte.2:exon5:c.C680G:p.A227G,Pla2g6:uc007wtf.2:exon5:c.C680G:p.A227G,Pla2g6:uc007wtg.2:exon6:c.C680G:p.A227G	exonic	ENSMUSG00000042632	NA	nonsynonymous SNV	ENSMUSG00000042632:ENSMUST00000047816:exon5:c.C680G:p.A227G,ENSMUSG00000042632:ENSMUST00000166977:exon5:c.C680G:p.A227G,ENSMUSG00000042632:ENSMUST00000174021:exon5:c.C680G:p.A227G,ENSMUSG00000042632:ENSMUST00000172403:exon6:c.C680G:p.A227G,ENSMUSG00000042632:ENSMUST00000173163:exon6:c.C680G:p.A227G	15qE1	NA	NA	-	CATCTTGCAGGCCAGGTGCAG	chr15	79308786	CAGxCCA	G	C	66_S3_L001_R1_001	64_Jiri_S1_L001_R1_001	0	NOVEL	COVERED	0.899313	0.899314	0.999999	0.999999	0.999806	77	0	15.6801	18.1854	10.267	7.19128	0.243902	0.02	-0.367409
ACR_S9_1	chr15	80395466	80395466	T	A	exonic	Cacna1i	NA	nonsynonymous SNV	Cacna1i:NM_001044308:exon37:c.T6407A:p.L2136Q	exonic	Cacna1i	NA	nonsynonymous SNV	Cacna1i:uc009var.1:exon37:c.T6407A:p.L2136Q	exonic	ENSMUSG00000022416	NA	nonsynonymous SNV	ENSMUSG00000022416:ENSMUST00000160424:exon37:c.T6407A:p.L2136Q	15qE1	NA	NA	+	ACCAGCAGCCTGGCTGCTGGA	chr15	80395466	GCCxGGC	T	A	66_S3_L001_R1_001	64_Jiri_S1_L001_R1_001	0	NOVEL	COVERED	0.954425	0.954491	0.999931	0.999931	0.991692	74	0	-2.11488	6.3433	3.06573	3.13541	0.083333	0.02	-0.429293
ACR_S9_1	chr15	83505464	83505464	G	T	intronic	Ttll1	NA	NA	NA	intronic	Ttll1	NA	NA	NA	intronic	ENSMUSG00000022442	NA	NA	NA	15qE1	NA	NA	-	ACCATGCAAAGTAAACATCAT	chr15	83505464	AAAxTAA	G	T	66_S3_L001_R1_001	64_Jiri_S1_L001_R1_001	0	NOVEL	COVERED	0.999881	0.999881	1	1	0.999999	141	1	47.4377	51.7649	16.0868	37.0599	0.271739	0.02	0.791405
ACR_S9_1	chr15	88816196	88816196	C	T	exonic	Alg12	NA	stopgain	Alg12:NM_001142357:exon2:c.G36A:p.W12X,Alg12:NM_145477:exon2:c.G36A:p.W12X	exonic	Alg12	NA	stopgain	Alg12:uc007xen.2:exon2:c.G36A:p.W12X,Alg12:uc007xeo.2:exon2:c.G36A:p.W12X	exonic	ENSMUSG00000035845	NA	stopgain	ENSMUSG00000035845:ENSMUST00000043087:exon2:c.G36A:p.W12X,ENSMUSG00000035845:ENSMUST00000159328:exon2:c.G36A:p.W12X,ENSMUSG00000035845:ENSMUST00000162183:exon2:c.G36A:p.W12X	15qE3	NA	NA	-	CCAGAAGCGGCCATGACCGCT	chr15	88816196	CGGxCAT	C	T	66_S3_L001_R1_001	64_Jiri_S1_L001_R1_001	0	NOVEL	COVERED	0.996724	0.996724	1	1	0.999974	108	0	1.04457	11.9266	0	12.8915	0.101449	0.02	0.88758
ACR_S9_1	chr15	101947046	101947046	T	C	exonic	Krt78	NA	nonsynonymous SNV	Krt78:NM_212487:exon9:c.A2329G:p.M777V	exonic	Krt78	NA	nonsynonymous SNV	Krt78:uc007xuh.1:exon9:c.A2329G:p.M777V,Krt78:uc011zzv.1:exon9:c.A2323G:p.M775V	exonic	ENSMUSG00000050463	NA	nonsynonymous SNV	ENSMUSG00000050463:ENSMUST00000164932:exon9:c.A2329G:p.M777V	15qF2	NA	NA	-	CCTCTAGGCATGGTCACCTGG	chr15	101947046	GCAxGGT	T	C	66_S3_L001_R1_001	E210_S1	0	NOVEL	COVERED	1	1	1	1	0.999912	190	16	-12.4774	7.97837	7.18452	2.81486	0.1	0.02	1.44885
ACR_S9_1	chr15	102315330	102315330	C	T	exonic	Espl1	NA	synonymous SNV	Espl1:NM_001014976:exon18:c.C3315T:p.D1105D	exonic	Espl1	NA	synonymous SNV	Espl1:uc007xvf.2:exon18:c.C3315T:p.D1105D,Espl1:uc007xvg.2:exon18:c.C3315T:p.D1105D	exonic	ENSMUSG00000058290	NA	synonymous SNV	ENSMUSG00000058290:ENSMUST00000064924:exon18:c.C3315T:p.D1105D	15qF3	NA	NA	+	AGCTGGTGGACACTGTGCTCA	chr15	102315330	GGAxACT	C	T	66_S3_L001_R1_001	64_Jiri_S1_L001_R1_001	0	NOVEL	COVERED	0.999835	0.999835	1	1	1	145	0	39.65	44.8083	31.4088	24.6038	0.247191	0.02	0.71236
ACR_S9_1	chr15	102315338	102315338	T	G	exonic	Espl1	NA	nonsynonymous SNV	Espl1:NM_001014976:exon18:c.T3323G:p.L1108R	exonic	Espl1	NA	nonsynonymous SNV	Espl1:uc007xvf.2:exon18:c.T3323G:p.L1108R,Espl1:uc007xvg.2:exon18:c.T3323G:p.L1108R	exonic	ENSMUSG00000058290	NA	nonsynonymous SNV	ENSMUSG00000058290:ENSMUST00000064924:exon18:c.T3323G:p.L1108R	15qF3	NA	NA	+	GACACTGTGCTCAACGAACCT	chr15	102315338	TGCxCAA	T	G	66_S3_L001_R1_001	64_Jiri_S1_L001_R1_001	0	NOVEL	COVERED	0.999956	0.999956	1	1	1	155	0	35.4502	41.3818	18.5354	28.233	0.244898	0.02	0.634335
ACR_S9_1	chr15	102319819	102319819	A	C	exonic	Espl1	NA	nonsynonymous SNV	Espl1:NM_001014976:exon22:c.A5027C:p.K1676T	exonic	Espl1	NA	nonsynonymous SNV	Espl1:uc007xvf.2:exon22:c.A5027C:p.K1676T,Espl1:uc007xvg.2:exon22:c.A5027C:p.K1676T	exonic	ENSMUSG00000058290	NA	nonsynonymous SNV	ENSMUSG00000058290:ENSMUST00000064924:exon22:c.A5027C:p.K1676T	15qF3	NA	NA	+	TTTTCCTTTAAGGCTTTGGGA	chr15	102319819	TTAxGGC	A	C	66_S3_L001_R1_001	64_Jiri_S1_L001_R1_001	0	NOVEL	COVERED	0.997163	0.997163	1	1	0.999999	120	1	-4.38246	8.07105	6.78337	5.47004	0.084507	0.02	0.78124
ACR_S9_1	chr15	102503679	102503679	C	G	intronic	Map3k12	NA	NA	NA	intronic	Map3k12	NA	NA	NA	intronic	ENSMUSG00000023050	NA	NA	NA	15qF3	NA	NA	-	GAAGGGTTCTCTCCAGACCTG	chr15	102503679	TCTxTCC	C	G	66_S3_L001_R1_001	64_Jiri_S1_L001_R1_001	0	NOVEL	COVERED	0.999678	0.999678	1	1	1	137	0	-4.44839	10.5741	3.27333	7.06637	0.082353	0.02	0.845797
ACR_S9_1	chr16	13833919	13833919	T	G	UTR3	Pdxdc1	NM_001291017:c.*895A>C,NM_001039533:c.*902A>C	NA	NA	intronic	Ntan1	NA	NA	NA	UTR3	ENSMUSG00000022680	ENSMUST00000023361:c.*895A>C	NA	NA	16qA1	NA	NA	-	ACTTTTTTTTTTTTTTTTTTT	chr16	13833919	TTTxTTT	T	G	66_S3_L001_R1_001	64_Jiri_S1_L001_R1_001	0	NOVEL	COVERED	0.995687	0.995687	1	1	1	128	1	15.51	18.7388	13.1656	5.58322	0.222222	0.02	1.00235
ACR_S9_1	chr16	18253260	18253260	G	C	exonic	Trmt2a	NA	nonsynonymous SNV	Trmt2a:NM_001195205:exon11:c.G1660C:p.E554Q,Trmt2a:NM_001080999:exon12:c.G1777C:p.E593Q,Trmt2a:NM_001081000:exon12:c.G1777C:p.E593Q	exonic	Trmt2a	NA	nonsynonymous SNV	Trmt2a:uc007ynb.2:exon11:c.G1744C:p.E582Q,Trmt2a:uc007ync.2:exon11:c.G1660C:p.E554Q,Trmt2a:uc007ymz.2:exon12:c.G1777C:p.E593Q,Trmt2a:uc007yna.2:exon12:c.G1777C:p.E593Q	exonic	ENSMUSG00000022721	NA	nonsynonymous SNV	ENSMUSG00000022721:ENSMUST00000140206:exon11:c.G1660C:p.E554Q,ENSMUSG00000022721:ENSMUST00000100099:exon12:c.G1777C:p.E593Q,ENSMUSG00000022721:ENSMUST00000115640:exon12:c.G1777C:p.E593Q	16qA3	NA	NA	+	GGAGCATCAAGAATTTCAGAC	chr16	18253260	CAAxAAT	G	C	66_S3_L001_R1_001	64_Jiri_S1_L001_R1_001	0	NOVEL	COVERED	0.954491	0.954491	1	1	0.999992	90	0	25.1536	27.2677	15.4644	13.8651	0.276596	0.02	-0.429502
ACR_S9_1	chr16	20502579	20502579	C	G	exonic	Eif2b5	NA	nonsynonymous SNV	Eif2b5:NM_172265:exon7:c.C881G:p.A294G	exonic	Eif2b5	NA	nonsynonymous SNV	Eif2b5:uc007ypu.2:exon7:c.C881G:p.A294G	exonic	ENSMUSG00000003235	NA	nonsynonymous SNV	ENSMUSG00000003235:ENSMUST00000003320:exon7:c.C881G:p.A294G	16qA3	NA	NA	+	GAATATGGTGCCCGGGTCTCC	chr16	20502579	GTGxCCG	C	G	66_S3_L001_R1_001	64_Jiri_S1_L001_R1_001	0	NOVEL	COVERED	0.981955	0.981955	1	1	1	116	0	7.9771	14.8554	10.044	13.3623	0.142857	0.02	1.0978
ACR_S9_1	chr16	44139548	44139548	G	T	upstream	Atp6v1a,Naa50	NA	NA	NA	upstream	Atp6v1a,Naa50	NA	NA	NA	UTR5	ENSMUSG00000052459	ENSMUST00000137557:c.-22680C>A,ENSMUST00000147025:c.-22680C>A	NA	NA	16qB4	NA	NA	NA	CTATTAGTCGGCCAGAGGGTT	chr16	44139548	TCGxCCA	G	T	66_S3_L001_R1_001	70_S7_L001_R1_001	0	NOVEL	COVERED	1	1	1	1	1	642	0	77.1743	100.647	75.4418	26.8415	0.194853	0.02	5.00982
ACR_S9_1	chr16	48315824	48315824	T	G	exonic	Dppa2	NA	nonsynonymous SNV	Dppa2:NM_028615:exon5:c.T538G:p.W180G	exonic	Dppa2	NA	nonsynonymous SNV	Dppa2:uc007zjn.1:exon5:c.T538G:p.W180G	exonic	ENSMUSG00000072419	NA	nonsynonymous SNV	ENSMUSG00000072419:ENSMUST00000097175:exon5:c.T538G:p.W180G	16qB5	NA	NA	+	ATTTGCAGCCTGGGCAAGGAT	chr16	48315824	GCCxGGG	T	G	66_S3_L001_R1_001	64_Jiri_S1_L001_R1_001	0	NOVEL	COVERED	0.999978	0.999978	1	1	1	168	2	28.1175	36.5225	14.129	26.4813	0.203883	0.02	2.1948
ACR_S9_1	chr16	94468906	94468906	C	A	UTR3	Ttc3	NM_009441:c.*906C>A	NA	NA	UTR3	Ttc3	uc008aaz.1:c.*906C>A	NA	NA	UTR3	ENSMUSG00000040785	ENSMUST00000117648:c.*906C>A	NA	NA	16qC4	NA	NA	+	AAACAAAAAACTTTTCCAGCG	chr16	94468906	AAAxTTT	C	A	66_S3_L001_R1_001	64_Jiri_S1_L001_R1_001	0	NOVEL	COVERED	1	1	1	1	1	253	0	11.0728	28.8656	16.4012	15.3465	0.124031	0.02	1.96735
ACR_S9_1	chr17	15553460	15553460	C	T	exonic	Prdm9	NA	nonsynonymous SNV	Prdm9:NM_144809:exon9:c.G1048A:p.V350I	exonic	Prdm9	NA	nonsynonymous SNV	Prdm9:uc029tan.1:exon4:c.G499A:p.V167I,Prdm9:uc012aku.1:exon9:c.G1048A:p.V350I,Prdm9:uc033hax.1:exon9:c.G1054A:p.V352I,Prdm9:uc033hay.1:exon9:c.G1048A:p.V350I,Prdm9:uc033haz.1:exon9:c.G1048A:p.V350I,Prdm9:uc008aos.1:exon11:c.G673A:p.V225I	exonic	ENSMUSG00000051977	NA	nonsynonymous SNV	ENSMUSG00000051977:ENSMUST00000167994:exon9:c.G1048A:p.V350I,ENSMUSG00000051977:ENSMUST00000147532:exon11:c.G673A:p.V225I	17qA2	NA	NA	-	GGTCTGATAACCCGGCAGGTT	chr17	15553460	TAAxCCG	C	T	66_S3_L001_R1_001	64_Jiri_S1_L001_R1_001	0	NOVEL	COVERED	1	1	1	1	1	595	0	113.978	133.346	13.1597	127.445	0.230241	0.02	4.91786
ACR_S9_1	chr17	25848657	25848657	C	G	exonic	Wdr90	NA	nonsynonymous SNV	Wdr90:NM_001163766:exon32:c.G4330C:p.E1444Q	exonic	Wdr90	NA	nonsynonymous SNV	Wdr90:uc012anm.1:exon30:c.G3646C:p.E1216Q,Wdr90:uc008bci.2:exon31:c.G3646C:p.E1216Q,Wdr90:uc008bcj.2:exon32:c.G4330C:p.E1444Q	exonic	ENSMUSG00000073434	NA	nonsynonymous SNV	ENSMUSG00000073434:ENSMUST00000079461:exon32:c.G4330C:p.E1444Q,ENSMUSG00000073434:ENSMUST00000176923:exon32:c.G4276C:p.E1426Q	17qA3.3	NA	NA	-	GAGGTCAACTCGGACGCCCCC	chr17	25848657	ACTxGGA	C	G	66_S3_L001_R1_001	64_Jiri_S1_L001_R1_001	0	NOVEL	COVERED	0.996233	0.996233	1	1	1	140	0	-1.72741	10.1312	9.29073	2.64009	0.086957	0.02	0.896398
ACR_S9_1	chr17	26196789	26196789	C	G	exonic	Pdia2	NA	nonsynonymous SNV	Pdia2:NM_001081070:exon8:c.G1142C:p.S381T	exonic	Pdia2	NA	nonsynonymous SNV	Pdia2:uc008bdo.1:exon8:c.G1142C:p.S381T,Pdia2:uc012ans.1:exon8:c.G1133C:p.S378T	exonic	ENSMUSG00000024184	NA	nonsynonymous SNV	ENSMUSG00000024184:ENSMUST00000039113:exon8:c.G1142C:p.S381T,ENSMUSG00000024184:ENSMUST00000120333:exon8:c.G1133C:p.S378T	17qA3.3	NA	NA	-	TATCTCCTGACTCAGGAGATA	chr17	26196789	TGAxTCA	C	G	66_S3_L001_R1_001	70_S7_L001_R1_001	0	NOVEL	COVERED	0.888875	0.888875	1	1	0.999995	86	0	2.48773	8.2003	1.6763	6.26977	0.121951	0.02	-0.358665
ACR_S9_1	chr17	29628908	29628908	T	G	intronic	Rnf8	NA	NA	NA	intronic	Rnf8	NA	NA	NA	ncRNA_intronic	ENSMUSG00000099329	NA	NA	NA	17qA3.3	NA	NA	+	CTAGGTTTTGTTATCTTACAC	chr17	29628908	TTGxTAT	T	G	66_S3_L001_R1_001	64_Jiri_S1_L001_R1_001	0	NOVEL	COVERED	0.909069	0.909069	1	1	1	97	0	12.4805	16.2415	11.9243	6.18264	0.190476	0.02	-0.36821
ACR_S9_1	chr17	32377518	32377518	T	A	intronic	Wiz	NA	NA	NA	exonic	Wiz	NA	nonsynonymous SNV	Wiz:uc008bwt.2:exon4:c.A1241T:p.K414M	ncRNA_exonic	ENSMUSG00000097861	NA	NA	NA	17qB1	NA	NA	-	CACATGCAGCTTGGCATGCTG	chr17	32377518	AGCxTGG	T	A	66_S3_L001_R1_001	70_S7_L001_R1_001	0	NOVEL	COVERED	0.800245	0.800245	1	1	0.999912	72	0	1.69989	6.81787	1.26052	5.49865	0.114286	0.02	-0.306427
ACR_S9_1	chr17	32377521	32377521	G	C	intronic	Wiz	NA	NA	NA	exonic	Wiz	NA	nonsynonymous SNV	Wiz:uc008bwt.2:exon4:c.C1238G:p.A413G	ncRNA_exonic	ENSMUSG00000097861	NA	NA	NA	17qB1	NA	NA	-	ATGCAGCTTGGCATGCTGCAT	chr17	32377521	TTGxCAT	G	C	66_S3_L001_R1_001	70_S7_L001_R1_001	0	NOVEL	COVERED	0.800245	0.800245	0.999999	0.999999	0.999855	71	0	1.78165	6.91511	1.28294	5.66351	0.114286	0.02	-0.306809
ACR_S9_1	chr17	32820498	32820498	A	G	exonic	Zfp799	NA	nonsynonymous SNV	Zfp799:NM_177359:exon4:c.T793C:p.S265P	exonic	Zfp799	NA	nonsynonymous SNV	Zfp799:uc008bxo.1:exon4:c.T793C:p.S265P	exonic	ENSMUSG00000095253	NA	nonsynonymous SNV	ENSMUSG00000095253:ENSMUST00000179695:exon3:c.T790C:p.S264P	17qB1	NA	NA	-	GTCAGCAGGGAGCTCGAACGG	chr17	32820498	GGGxGCT	A	G	66_S3_L001_R1_001	64_Jiri_S1_L001_R1_001	0	NOVEL	COVERED	0.999999	0.999999	1	1	1	227	0	-4.3951	16.4916	4.56479	14.0786	0.084034	0.02	2.05461
ACR_S9_1	chr17	33137820	33137820	C	A	exonic	Morc2b	NA	nonsynonymous SNV	Morc2b:NM_177719:exon2:c.G977T:p.R326L	exonic	Morc2b	NA	nonsynonymous SNV	Morc2b:uc033hcq.1:exon1:c.G977T:p.R326L,Morc2b:uc008byc.2:exon2:c.G977T:p.R326L	exonic	ENSMUSG00000048602	NA	nonsynonymous SNV	ENSMUSG00000048602:ENSMUST00000131954:exon1:c.G977T:p.R326L,ENSMUSG00000048602:ENSMUST00000053896:exon2:c.G977T:p.R326L	17qB1	NA	NA	-	CCTGGAGTCCCGGGTGATGTC	chr17	33137820	TCCxGGG	C	A	66_S3_L001_R1_001	64_Jiri_S1_L001_R1_001	0	NOVEL	COVERED	0.984161	0.984161	1	1	0.999992	98	0	-1.31157	8.18681	7.51733	2.93748	0.089286	0.02	0.992478
ACR_S9_1	chr17	45033307	45033307	A	C	exonic	Supt3	NA	nonsynonymous SNV	Supt3:NM_178652:exon7:c.A574C:p.S192R	exonic	Supt3	NA	nonsynonymous SNV	Supt3:uc008cqh.1:exon6:c.A574C:p.S192R,Supt3:uc008cqf.1:exon7:c.A574C:p.S192R,Supt3:uc008cqg.1:exon7:c.A574C:p.S192R	exonic	ENSMUSG00000038954	NA	nonsynonymous SNV	ENSMUSG00000038954:ENSMUST00000129416:exon6:c.A553C:p.S185R,ENSMUSG00000038954:ENSMUST00000050630:exon7:c.A574C:p.S192R,ENSMUSG00000038954:ENSMUST00000127798:exon7:c.A574C:p.S192R	17qB3	NA	NA	+	CCGACAGTTAAGTTTCTGTGA	chr17	45033307	TTAxGTT	A	C	66_S3_L001_R1_001	64_Jiri_S1_L001_R1_001	0	NOVEL	COVERED	0.993703	0.993703	1	1	1	149	0	9.07587	15.8492	8.42872	11.7333	0.169231	0.02	0.738048
ACR_S9_1	chr17	56125547	56125547	C	G	exonic	Sema6b	NA	nonsynonymous SNV	Sema6b:NM_001130456:exon15:c.G1655C:p.G552A,Sema6b:NM_013662:exon15:c.G1655C:p.G552A	exonic	Sema6b	NA	nonsynonymous SNV	Sema6b:uc008dbd.2:exon15:c.G1655C:p.G552A,Sema6b:uc008dbe.1:exon15:c.G1655C:p.G552A	exonic	ENSMUSG00000001227	NA	nonsynonymous SNV	ENSMUSG00000001227:ENSMUST00000001256:exon15:c.G1655C:p.G552A,ENSMUSG00000001227:ENSMUST00000167545:exon15:c.G1655C:p.G552A	17qD	NA	NA	-	GATGCAGGAGCCATCAGGGGC	chr17	56125547	GAGxCAT	C	G	66_S3_L001_R1_001	64_Jiri_S1_L001_R1_001	0	NOVEL	COVERED	0.877708	0.877708	1	1	0.999994	83	0	7.53123	11.7711	9.22403	7.33767	0.157895	0.02	-0.341837
ACR_S9_1	chr17	57301835	57301835	T	A	intronic	Vav1	NA	NA	NA	intronic	Vav1	NA	NA	NA	intronic	ENSMUSG00000034116	NA	NA	NA	17qD	NA	NA	+	AGGCCCAGGTTAATTCTGACA	chr17	57301835	GGTxAAT	T	A	66_S3_L001_R1_001	64_Jiri_S1_L001_R1_001	0	NOVEL	COVERED	0.760885	0.760887	0.999997	0.999997	0.998875	61	0	8.8561	11.9775	8.27072	3.48197	0.181818	0.02	-0.28885
ACR_S9_1	chr17	66348287	66348287	C	G	exonic	Mtcl1	NA	nonsynonymous SNV	Mtcl1:NM_001114098:exon11:c.G4027C:p.D1343H,Mtcl1:NM_172963:exon11:c.G4027C:p.D1343H	exonic	Soga2	NA	nonsynonymous SNV	Soga2:uc008djx.1:exon6:c.G1159C:p.D387H,Soga2:uc008dju.2:exon9:c.G2659C:p.D887H,Soga2:uc008djv.2:exon11:c.G4027C:p.D1343H,Soga2:uc008djw.2:exon11:c.G4027C:p.D1343H	exonic	ENSMUSG00000052105	NA	nonsynonymous SNV	ENSMUSG00000052105:ENSMUST00000145347:exon9:c.G2680C:p.D894H,ENSMUSG00000052105:ENSMUST00000086693:exon11:c.G4027C:p.D1343H,ENSMUSG00000052105:ENSMUST00000097291:exon11:c.G4027C:p.D1343H,ENSMUSG00000052105:ENSMUST00000177034:exon12:c.G3094C:p.D1032H	17qE1.1	NA	NA	-	CCTGGATCATCATCCAGGGAC	chr17	66348287	CATxATC	C	G	66_S3_L001_R1_001	64_Jiri_S1_L001_R1_001	0	NOVEL	COVERED	0.948402	0.948402	1	1	1	110	0	-1.62375	6.57911	4.95573	1.45722	0.085106	0.02	-0.42073
ACR_S9_1	chr17	71275054	71275054	C	G	exonic	Emilin2	NA	nonsynonymous SNV	Emilin2:NM_145158:exon4:c.G676C:p.E226Q	exonic	Emilin2	NA	nonsynonymous SNV	Emilin2:uc012awr.1:exon1:c.G79C:p.E27Q,Emilin2:uc008dme.1:exon4:c.G676C:p.E226Q,Emilin2:uc008dmf.1:exon4:c.G676C:p.E226Q,Emilin2:uc008dmg.1:exon4:c.G433C:p.E145Q	exonic	ENSMUSG00000024053	NA	nonsynonymous SNV	ENSMUSG00000024053:ENSMUST00000024849:exon4:c.G676C:p.E226Q	17qE1.3	NA	NA	-	GAGTCTGGCTCTTTTCTGCCA	chr17	71275054	GCTxTTT	C	G	66_S3_L001_R1_001	64_Jiri_S1_L001_R1_001	0	NOVEL	UNCOVERED	0.161897	0.162467	0.99649	0.99649	0	28	0	5.61982	6.48284	7.7244	1.61632	0.230769	0.02	-0.113969
ACR_S9_1	chr17	72939386	72939386	T	A	exonic	Lbh	NA	nonsynonymous SNV	Lbh:NM_029999:exon3:c.T260A:p.V87D	exonic	Lbh	NA	nonsynonymous SNV	Lbh:uc008dng.2:exon3:c.T260A:p.V87D	exonic	ENSMUSG00000024063	NA	nonsynonymous SNV	ENSMUSG00000024063:ENSMUST00000024857:exon3:c.T260A:p.V87D	17qE1.3	NA	NA	+	GAATTCCTGGTCCAGGAGGAT	chr17	72939386	TGGxCCA	T	A	66_S3_L001_R1_001	64_Jiri_S1_L001_R1_001	0	NOVEL	COVERED	0.818465	0.818465	1	1	0.999994	79	0	1.40109	6.76647	3.73567	4.02097	0.111111	0.02	-0.315158
ACR_S9_1	chr18	5592180	5592180	T	C	ncRNA_exonic	Gm10125	NA	NA	NA	ncRNA_exonic	Gm10125	NA	NA	NA	ncRNA_exonic	ENSMUSG00000063087	NA	NA	NA	18qA1	NA	NA	-	GCCTAGCGGCTCCGGCGGCCG	chr18	5592180	GGCxCCG	T	C	66_S3_L001_R1_001	64_Jiri_S1_L001_R1_001	0	NOVEL	COVERED	0.999407	0.999407	1	1	0.999995	127	0	-7.69069	7.64567	0	8.51438	0.064103	0.02	0.80074
ACR_S9_1	chr18	5705147	5705147	G	T	exonic	Zeb1	NA	nonsynonymous SNV	Zeb1:NM_011546:exon2:c.G163T:p.G55C	exonic	Zeb1	NA	nonsynonymous SNV	Zeb1:uc008dyx.2:exon2:c.G163T:p.G55C,Zeb1:uc008dyy.2:exon2:c.G163T:p.G55C	exonic	ENSMUSG00000024238	NA	nonsynonymous SNV	ENSMUSG00000024238:ENSMUST00000025081:exon2:c.G163T:p.G55C,ENSMUSG00000024238:ENSMUST00000159390:exon2:c.G163T:p.G55C,ENSMUSG00000024238:ENSMUST00000160910:exon2:c.G112T:p.G38C,ENSMUSG00000024238:ENSMUST00000175925:exon2:c.G163T:p.G55C	18qA1	NA	NA	+	TGACTGTGAAGGTGGCATGCC	chr18	5705147	GAAxGTG	G	T	66_S3_L001_R1_001	64_Jiri_S1_L001_R1_001	0	NOVEL	COVERED	0.996722	0.996724	0.999999	0.999999	0.999806	105	0	-6.00294	7.19257	2.86828	7.59352	0.071429	0.02	0.88777
ACR_S9_1	chr18	21624683	21624683	C	G	exonic	Klhl14	NA	nonsynonymous SNV	Klhl14:NM_001081403:exon2:c.G969C:p.K323N	exonic	Klhl14	NA	nonsynonymous SNV	Klhl14:uc008efi.1:exon2:c.G969C:p.K323N	exonic	ENSMUSG00000042514	NA	nonsynonymous SNV	ENSMUSG00000042514:ENSMUST00000049105:exon2:c.G969C:p.K323N,ENSMUSG00000042514:ENSMUST00000122333:exon3:c.G969C:p.K323N	18qA2	NA	NA	-	GCAGCATTTTCTTGTTAGAGC	chr18	21624683	TTTxTTG	C	G	66_S3_L001_R1_001	64_Jiri_S1_L001_R1_001	0	NOVEL	COVERED	1	1	1	1	1	273	0	6.51327	29.4764	20.6291	19.9233	0.115385	0.02	3.41073
ACR_S9_1	chr18	31206375	31206375	C	A	intronic	Rit2	NA	NA	NA	intronic	Rit2	NA	NA	NA	UTR3	ENSMUSG00000057455	ENSMUST00000139924:c.*903G>T	NA	NA	18qB1	NA	NA	-	GCATTTAAAACACAGTGCTAG	chr18	31206375	AAAxACA	C	A	66_S3_L001_R1_001	64_Jiri_S1_L001_R1_001	0	NOVEL	COVERED	1	1	1	1	1	1513	0	27.4352	172.65	72.8032	130.083	0.108673	0.02	21.0828
ACR_S9_1	chr18	31207146	31207146	A	G	intronic	Rit2	NA	NA	NA	intronic	Rit2	NA	NA	NA	UTR3	ENSMUSG00000057455	ENSMUST00000139924:c.*132T>C	NA	NA	18qB1	NA	NA	-	AAACACACACAGTTAAAAGTT	chr18	31207146	CACxGTT	A	G	66_S3_L001_R1_001	64_Jiri_S1_L001_R1_001	0	NOVEL	COVERED	0.999997	0.999997	1	1	1	181	0	-14.4791	8.65926	2.65376	9.80688	0.061404	0.02	1.99267
ACR_S9_1	chr18	36687313	36687313	G	C	exonic	E230025N22Rik	NA	nonsynonymous SNV	E230025N22Rik:NM_172831:exon10:c.C815G:p.A272G	exonic	E230025N22Rik	NA	nonsynonymous SNV	E230025N22Rik:uc008eoe.1:exon10:c.C815G:p.A272G	exonic	ENSMUSG00000044719	NA	nonsynonymous SNV	ENSMUSG00000044719:ENSMUST00000115682:exon10:c.C815G:p.A272G	18qB2	NA	NA	-	TCTTCTTCCTGCCTCTAGAGG	chr18	36687313	CCTxCCT	G	C	66_S3_L001_R1_001	64_Jiri_S1_L001_R1_001	0	NOVEL	COVERED	0.999996	0.999996	1	1	1	199	0	-6.08538	13.1545	2.42886	13.191	0.083333	0.02	2.00668
ACR_S9_1	chr18	36969347	36969347	T	A	exonic	Pcdha6,Pcdha6-g	NA	nonsynonymous SNV	Pcdha6-g:NM_001301256:exon1:c.T1619A:p.L540Q,Pcdha6:NM_007767:exon1:c.T1592A:p.L531Q	exonic	Pcdha6	NA	nonsynonymous SNV	Pcdha6:uc008epb.2:exon1:c.T1592A:p.L531Q,Pcdha6:uc012bbw.1:exon1:c.T1592A:p.L531Q	intronic	ENSMUSG00000007440	NA	NA	NA	18qB2	NA	NA	NA	CTGGAACTGCTGCAGTTCCAG	chr18	36969347	TGCxGCA	T	A	66_S3_L001_R1_001	E210_S1	0	NOVEL	COVERED	0.988612	0.992094	0.99649	0.99649	0	78	0	2.71913	11.3754	5.05403	6.22089	0.116667	0.02	0.877955
ACR_S9_1	chr18	61112749	61112749	A	C	exonic	Csf1r	NA	nonsynonymous SNV	Csf1r:NM_001037859:exon6:c.A777C:p.K259N	exonic	Csf1r	NA	nonsynonymous SNV	Csf1r:uc008fbo.1:exon5:c.A777C:p.K259N,Csf1r:uc008fbp.1:exon5:c.A777C:p.K259N,Csf1r:uc008fbn.1:exon6:c.A777C:p.K259N	exonic	ENSMUSG00000024621	NA	nonsynonymous SNV	ENSMUSG00000024621:ENSMUST00000115268:exon5:c.A777C:p.K259N,ENSMUSG00000024621:ENSMUST00000025523:exon6:c.A777C:p.K259N	18qE1	NA	NA	+	ATTATAAAAAAGTCCGGGCTC	chr18	61112749	AAAxGTC	A	C	66_S3_L001_R1_001	64_Jiri_S1_L001_R1_001	0	NOVEL	COVERED	1	1	1	1	1	716	0	-23.5639	50.8611	31.7111	26.4323	0.090909	0.02	7.06577
ACR_S9_1	chr18	61127889	61127889	T	C	exonic	Csf1r	NA	synonymous SNV	Csf1r:NM_001037859:exon16:c.T2151C:p.G717G	exonic	Csf1r	NA	synonymous SNV	Csf1r:uc008fbn.1:exon16:c.T2151C:p.G717G	exonic	ENSMUSG00000024621	NA	synonymous SNV	ENSMUSG00000024621:ENSMUST00000115268:exon15:c.T2151C:p.G717G,ENSMUSG00000024621:ENSMUST00000025523:exon16:c.T2151C:p.G717G	18qE1	NA	NA	+	CCAGTCAGGGTGTAGACACCT	chr18	61127889	GGGxGTA	T	C	66_S3_L001_R1_001	64_Jiri_S1_L001_R1_001	0	NOVEL	COVERED	0.71725	0.717315	0.999909	0.999909	0.989678	55	0	2.39574	6.54562	6.80156	0	0.129032	0.02	-0.271423
ACR_S9_1	chr18	61157664	61157664	T	C	exonic	Hmgxb3	NA	nonsynonymous SNV	Hmgxb3:NM_134134:exon7:c.A1136G:p.N379S,Hmgxb3:NM_178277:exon7:c.A1136G:p.N379S	exonic	Hmgxb3	NA	nonsynonymous SNV	Hmgxb3:uc008fbq.1:exon7:c.A1136G:p.N379S,Hmgxb3:uc008fbr.1:exon7:c.A1136G:p.N379S,Hmgxb3:uc008fbs.1:exon7:c.A1136G:p.N379S	exonic	ENSMUSG00000024622	NA	nonsynonymous SNV	ENSMUSG00000024622:ENSMUST00000091884:exon7:c.A1136G:p.N379S	18qE1	NA	NA	-	CTTAGAGGGGTTTTGCTCAGT	chr18	61157664	GGGxTTT	T	C	66_S3_L001_R1_001	64_Jiri_S1_L001_R1_001	0	NOVEL	COVERED	0.999556	0.999559	0.999997	0.999997	0.999646	114	0	0.463473	14.2619	0	14.7234	0.095238	0.02	0.861146
ACR_S9_1	chr18	61312107	61312107	A	G	intronic	Ppargc1b	NA	NA	NA	intronic	Ppargc1b	NA	NA	NA	intronic	ENSMUSG00000033871	NA	NA	NA	18qE1	NA	NA	-	GCCACGGCTGACAGCCATCTA	chr18	61312107	CTGxCAG	A	G	66_S3_L001_R1_001	64_Jiri_S1_L001_R1_001	0	NOVEL	COVERED	0.865743	0.865745	0.999997	0.999997	0.998875	67	0	0.989018	7.11686	7.42311	0	0.102564	0.02	-0.341687
ACR_S9_1	chr18	61990751	61990751	T	C	exonic	Sh3tc2	NA	nonsynonymous SNV	Sh3tc2:NM_172628:exon11:c.T2582C:p.L861P	exonic	Sh3tc2	NA	nonsynonymous SNV	Sh3tc2:uc008fcw.1:exon1:c.T1361C:p.L454P,Sh3tc2:uc008fcv.1:exon11:c.T2582C:p.L861P	exonic	ENSMUSG00000045629	NA	nonsynonymous SNV	ENSMUSG00000045629:ENSMUST00000051720:exon11:c.T2582C:p.L861P	18qE1	NA	NA	+	AAGAGCTACCTCCGAGCTCTG	chr18	61990751	ACCxCCG	T	C	66_S3_L001_R1_001	64_Jiri_S1_L001_R1_001	0	NOVEL	COVERED	0.899252	0.899314	0.999931	0.999931	0.991692	67	0	-0.100728	6.7845	5.55223	5.41291	0.095238	0.02	-0.367725
ACR_S9_1	chr18	63113888	63113888	A	T	exonic	Piezo2	NA	nonsynonymous SNV	Piezo2:NM_001039485:exon13:c.T1748A:p.L583H	exonic	Piezo2	NA	nonsynonymous SNV	Piezo2:uc008fdv.1:exon6:c.T1001A:p.L334H,Piezo2:uc012bea.2:exon13:c.T1748A:p.L583H,Piezo2:uc029tni.1:exon13:c.T1748A:p.L583H	exonic	ENSMUSG00000041482	NA	nonsynonymous SNV	ENSMUSG00000041482:ENSMUST00000182233:exon8:c.T1052A:p.L351H,ENSMUSG00000041482:ENSMUST00000046860:exon13:c.T1748A:p.L583H,ENSMUSG00000041482:ENSMUST00000047480:exon13:c.T1748A:p.L583H,ENSMUSG00000041482:ENSMUST00000183217:exon13:c.T1748A:p.L583H	18qE1	NA	NA	-	CTTTGAAGCAAGTTCTCCCGG	chr18	63113888	GCAxGTT	A	T	66_S3_L001_R1_001	64_Jiri_S1_L001_R1_001	0	NOVEL	COVERED	1	1	1	1	1	478	0	-18.9795	35.0065	19.0201	21.9951	0.077703	0.02	4.88071
ACR_S9_1	chr18	75368676	75368676	C	G	UTR5	Smad7	NM_001042660:c.-280C>G	NA	NA	UTR5	Smad7	uc008fqe.2:c.-280C>G,uc008fqd.1:c.-280C>G	NA	NA	UTR5	ENSMUSG00000025880	ENSMUST00000026999:c.-280C>G	NA	NA	18qE3	NA	NA	+	GGCCCGAAAGCCGCGCAGGGC	chr18	75368676	AAGxCGC	C	G	66_S3_L001_R1_001	64_Jiri_S1_L001_R1_001	0	NOVEL	COVERED	1	1	1	1	1	329	0	-0.070954	30.5068	1.40778	29.2174	0.105	0.02	4.07803
ACR_S9_1	chr18	78751595	78751595	T	A	UTR3	Setbp1	NM_053099:c.*3620A>T	NA	NA	UTR3	Setbp1	uc008fsi.2:c.*3620A>T	NA	NA	UTR3	ENSMUSG00000024548	ENSMUST00000025430:c.*3620A>T,ENSMUST00000161465:c.*3620A>T	NA	NA	18qE3	NA	NA	-	TAATACCAAATCCTTTATGAT	chr18	78751595	AAAxCCT	T	A	66_S3_L001_R1_001	64_Jiri_S1_L001_R1_001	0	NOVEL	COVERED	0.999919	0.999919	1	1	1	173	0	23.4349	31.6009	11.3257	22.2112	0.188889	0.02	0.685495
ACR_S9_1	chr19	4223334	4223334	G	C	downstream	Clcf1	NA	NA	NA	UTR3	Clcf1	uc008fzl.1:c.*2810G>C	NA	NA	UTR3	ENSMUSG00000040663	ENSMUST00000046506:c.*766G>C,ENSMUST00000138090:c.*1407G>C	NA	NA	19qA	NA	NA	+	GCATTGTGGGGTGAGGGGGAT	chr19	4223334	GGGxTGA	G	C	66_S3_L001_R1_001	64_Jiri_S1_L001_R1_001	0	NOVEL	COVERED	0.997163	0.997163	1	1	0.999999	119	0	4.62019	14.5881	7.29902	11.0515	0.115942	0.02	0.984905
ACR_S9_1	chr19	4601770	4601770	C	G	intronic	Pcx	NA	NA	NA	intronic	Pcx	NA	NA	NA	intronic	ENSMUSG00000024892	NA	NA	NA	19qA	NA	NA	+	CTTGGGCCAGCCTAGCCTGGC	chr19	4601770	CAGxCTA	C	G	66_S3_L001_R1_001	64_Jiri_S1_L001_R1_001	0	NOVEL	COVERED	0.999678	0.999678	1	1	1	141	0	-10.3265	7.2288	2.65906	8.3864	0.05814	0.02	0.747149
ACR_S9_1	chr19	4858066	4858066	A	G	exonic	Ctsf	NA	nonsynonymous SNV	Ctsf:NM_019861:exon6:c.A638G:p.K213R	exonic	Ctsf	NA	nonsynonymous SNV	Ctsf:uc008gbd.1:exon5:c.A158G:p.K53R,Ctsf:uc008gbc.1:exon6:c.A638G:p.K213R	exonic	ENSMUSG00000083282	NA	nonsynonymous SNV	ENSMUSG00000083282:ENSMUST00000119694:exon6:c.A638G:p.K213R	19qA	NA	NA	+	GGGATCACCAAGTTCAGTGAC	chr19	4858066	CCAxGTT	A	G	66_S3_L001_R1_001	64_Jiri_S1_L001_R1_001	0	NOVEL	COVERED	0.78106	0.78106	1	1	0.999992	74	0	15.4976	17.4857	13.5677	8.63365	0.242424	0.02	-0.297774
ACR_S9_1	chr19	5339116	5339116	G	C	exonic	Catsper1	NA	synonymous SNV	Catsper1:NM_139301:exon4:c.G1380C:p.L460L	exonic	Catsper1	NA	synonymous SNV	Catsper1:uc008gcp.1:exon4:c.G1380C:p.L460L	exonic	ENSMUSG00000038498	NA	synonymous SNV	ENSMUSG00000038498:ENSMUST00000043380:exon4:c.G1380C:p.L460L	19qA	NA	NA	+	TGCGGGCCCTGAGGGCCATCC	chr19	5339116	CCTxAGG	G	C	66_S3_L001_R1_001	70_S7_L001_R1_001	0	NOVEL	COVERED	0.865745	0.865745	1	1	0.999992	80	0	0.879362	6.76473	3.59973	3.09929	0.105263	0.02	-0.341882
ACR_S9_1	chr19	5851114	5851114	A	G	UTR3	Frmd8	NM_026169:c.*1507T>C	NA	NA	ncRNA_exonic	AK009639	NA	NA	NA	ncRNA_exonic	ENSMUSG00000043488	NA	NA	NA	19qA	NA	NA	-	GGAGACCTGGAGACCGGTCCC	chr19	5851114	TGGxGAC	A	G	66_S3_L001_R1_001	64_Jiri_S1_L001_R1_001	0	NOVEL	COVERED	0.999992	0.999992	1	1	1	193	0	-8.99664	10.6588	0	11.5897	0.083333	0.02	1.85494
ACR_S9_1	chr19	6830382	6830382	A	G	exonic	Rps6ka4	NA	nonsynonymous SNV	Rps6ka4:NM_019924:exon16:c.T2054C:p.L685P	exonic	Rps6ka4	NA	nonsynonymous SNV	Rps6ka4:uc008gja.2:exon16:c.T2054C:p.L685P	exonic	ENSMUSG00000024952	NA	nonsynonymous SNV	ENSMUSG00000024952:ENSMUST00000025903:exon16:c.T2054C:p.L685P,ENSMUSG00000024952:ENSMUST00000170516:exon16:c.T2054C:p.L685P	19qA	NA	NA	-	CGGCGTGCGGAGCGGGGGCGA	chr19	6830382	CGGxGCG	A	G	66_S3_L001_R1_001	64_Jiri_S1_L001_R1_001	0	NOVEL	COVERED	0.998696	0.998696	1	1	1	143	0	12.9702	21.5173	7.80968	15.7719	0.157895	0.02	0.933225
ACR_S9_1	chr19	8845145	8845145	A	T	intronic	Bscl2	NA	NA	NA	intronic	Bscl2	NA	NA	NA	intronic	ENSMUSG00000071657	NA	NA	NA	19qA	NA	NA	+	TTTTTTTTTTAACAAGATGTG	chr19	8845145	TTTxACA	A	T	66_S3_L001_R1_001	E210_S1	0	NOVEL	COVERED	0.818408	0.818465	0.999931	0.999931	0.991692	61	0	4.24789	6.59833	9.30888	0	0.206897	0.02	-0.312775
ACR_S9_1	chr19	9005862	9005862	T	G	exonic	Ahnak	NA	synonymous SNV	Ahnak:NM_009643:exon5:c.T4509G:p.L1503L	exonic	Ahnak	NA	synonymous SNV	Ahnak:uc008goj.2:exon5:c.T4509G:p.L1503L	exonic	ENSMUSG00000069833	NA	synonymous SNV	ENSMUSG00000069833:ENSMUST00000092956:exon5:c.T4509G:p.L1503L	19qA	NA	NA	+	ACTGGCACCTTAAGATGCCCA	chr19	9005862	CCTxAAG	T	G	66_S3_L001_R1_001	E210_S1	0	NOVEL	COVERED	1	1	1	1	1	196	0	-15.6506	8.53601	4.52997	5.78846	0.072	0.02	1.89037
ACR_S9_1	chr19	9009303	9009303	T	G	exonic	Ahnak	NA	nonsynonymous SNV	Ahnak:NM_009643:exon5:c.T7950G:p.N2650K	exonic	Ahnak	NA	nonsynonymous SNV	Ahnak:uc008goj.2:exon5:c.T7950G:p.N2650K	exonic	ENSMUSG00000069833	NA	nonsynonymous SNV	ENSMUSG00000069833:ENSMUST00000092956:exon5:c.T7950G:p.N2650K	19qA	NA	NA	+	GCCTGCCCAATGCTGACCTTG	chr19	9009303	CAAxGCT	T	G	66_S3_L001_R1_001	E210_S1	0	NOVEL	COVERED	1	1	1	1	1	398	1	-37.2567	17.2779	15.9036	5.84372	0.071174	0.02	5.08063
ACR_S9_1	chr19	10525120	10525120	G	C	UTR5	Sdhaf2	NM_025333:c.-26C>G	NA	NA	UTR5	Sdhaf2	uc008gpt.2:c.-26C>G,uc008gpv.1:c.-26C>G	NA	NA	UTR5	ENSMUSG00000024668	ENSMUST00000025570:c.-26C>G	NA	NA	19qA	NA	NA	-	CAGTAAGCTGGCAACCGGGCC	chr19	10525120	CTGxCAA	G	C	66_S3_L001_R1_001	64_Jiri_S1_L001_R1_001	0	NOVEL	COVERED	0.999992	0.999992	1	1	1	189	0	7.18069	22.6385	16.0557	7.65781	0.119266	0.02	2.04586
ACR_S9_1	chr19	11748580	11748580	A	G	exonic	Gif	NA	nonsynonymous SNV	Gif:NM_008118:exon2:c.A233G:p.Q78R	exonic	Gif	NA	nonsynonymous SNV	Gif:uc008gsw.1:exon2:c.A233G:p.Q78R	exonic	ENSMUSG00000024682	NA	nonsynonymous SNV	ENSMUSG00000024682:ENSMUST00000025585:exon2:c.A233G:p.Q78R	19qA	NA	NA	+	CTGACTTACCAGCTCATGGCC	chr19	11748580	ACCxGCT	A	G	66_S3_L001_R1_001	64_Jiri_S1_L001_R1_001	0	NOVEL	COVERED	0.986152	0.986153	0.999998	0.999998	0.999763	93	0	-2.34772	7.96662	0	8.4816	0.084746	0.02	0.98302
ACR_S9_1	chr19	34226642	34226642	A	G	exonic	Stambpl1	NA	nonsynonymous SNV	Stambpl1:NM_029682:exon3:c.A131G:p.E44G	exonic	Stambpl1	NA	nonsynonymous SNV	Stambpl1:uc029tsb.1:exon2:c.A131G:p.E44G,Stambpl1:uc008hgc.1:exon3:c.A131G:p.E44G,Stambpl1:uc008hgd.1:exon3:c.A131G:p.E44G	exonic	ENSMUSG00000024776	NA	nonsynonymous SNV	ENSMUSG00000024776:ENSMUST00000054956:exon3:c.A131G:p.E44G,ENSMUSG00000024776:ENSMUST00000119603:exon3:c.A131G:p.E44G,ENSMUSG00000024776:ENSMUST00000129535:exon3:c.A131G:p.E44G	19qC1	NA	NA	+	TCCATTAATGAAGATATCACC	chr19	34226642	ATGxAGA	A	G	66_S3_L001_R1_001	E210_S1	0	NOVEL	COVERED	1	1	1	1	1	549	0	-56.3036	12.538	9.4224	4.42871	0.034247	0.02	4.91675
ACR_S9_1	chr19	46134609	46134609	T	A	exonic	Elovl3	NA	nonsynonymous SNV	Elovl3:NM_007703:exon4:c.T623A:p.I208N	exonic	Elovl3	NA	nonsynonymous SNV	Elovl3:uc008hsk.1:exon4:c.T623A:p.I208N	exonic	ENSMUSG00000038754	NA	nonsynonymous SNV	ENSMUSG00000038754:ENSMUST00000043739:exon4:c.T623A:p.I208N	19qC3	NA	NA	+	AGCCTGCAGATTCTGCAGATG	chr19	46134609	AGAxTCT	T	A	66_S3_L001_R1_001	70_S7_L001_R1_001	0	NOVEL	COVERED	0.998993	0.998993	1	1	1	141	0	-4.46138	9.27139	4.68602	4.24613	0.078947	0.02	0.737767
ACR_S9_1	chr19	57686663	57686663	T	G	exonic	Atrnl1	NA	synonymous SNV	Atrnl1:NM_181415:exon13:c.T1983G:p.A661A	exonic	Atrnl1	NA	synonymous SNV	Atrnl1:uc008iaj.1:exon6:c.T387G:p.A129A,Atrnl1:uc008iai.2:exon13:c.T1983G:p.A661A	exonic	ENSMUSG00000054843	NA	synonymous SNV	ENSMUSG00000054843:ENSMUST00000077282:exon13:c.T1983G:p.A661A	19qD2	NA	NA	+	TTGCAGCTGCTACCGATGACA	chr19	57686663	TGCxACC	T	G	66_S3_L001_R1_001	64_Jiri_S1_L001_R1_001	0	NOVEL	COVERED	0.693666	0.693668	0.999997	0.999997	0.998875	58	0	5.66364	8.82471	3.35053	6.27338	0.166667	0.02	-0.262839
ACR_S9_1	chrX	102070937	102070937	A	G	UTR5	Rgag4	NM_001278534:c.-75T>C	NA	NA	UTR5	Rgag4	uc009tyi.3:c.-75T>C	NA	NA	UTR5	ENSMUSG00000049191	ENSMUST00000113631:c.-75T>C,ENSMUST00000119076:c.-75T>C	NA	NA	XqD	NA	NA	-	GAGGAGGCAGAAATGAGGAGG	chrX	102070937	CAGxAAT	A	G	66_S3_L001_R1_001	64_Jiri_S1_L001_R1_001	0	NOVEL	COVERED	0.519729	0.522161	0.995343	0.995343	0	38	0	4.31888	6.82876	0	7.87859	0.166667	0.02	-0.209604
ACR_S9_1	chrX	106202947	106202947	C	G	intronic	Pgk1	NA	NA	NA	intronic	Pgk1	NA	NA	NA	intronic	ENSMUSG00000062070	NA	NA	NA	XqD	NA	NA	+	TAAGCTTGGTCTCTGTGTTTT	chrX	106202947	GGTxTCT	C	G	66_S3_L001_R1_001	64_Jiri_S1_L001_R1_001	0	NOVEL	COVERED	0.641263	0.641347	0.999869	0.999869	0.984784	49	0	27.8182	27.8859	8.63549	18.7315	0.444444	0.02	-0.244858
ACR_S9_1	chrX	142319724	142319724	A	T	UTR3	Acsl4	NM_207625:c.*953T>A,NM_001033600:c.*953T>A,NM_019477:c.*953T>A	NA	NA	UTR3	Acsl4	uc009ulu.1:c.*953T>A,uc009ulv.1:c.*953T>A,uc009ulw.1:c.*953T>A,uc012hps.1:c.*953T>A	NA	NA	UTR3	ENSMUSG00000031278	ENSMUST00000112907:c.*953T>A,ENSMUST00000112904:c.*953T>A,ENSMUST00000112903:c.*953T>A,ENSMUST00000033634:c.*953T>A	NA	NA	XqF2	NA	NA	-	ATAAATTACAAATGTAATTTA	chrX	142319724	ACAxATG	A	T	66_S3_L001_R1_001	64_Jiri_S1_L001_R1_001	0	NOVEL	COVERED	0.999487	0.999487	1	1	1	198	0	-5.89369	9.19729	4.5496	4.44399	0.074074	0.02	0.772623
ACR_S9_1	chrX	142319725	142319725	A	T	UTR3	Acsl4	NM_207625:c.*952T>A,NM_001033600:c.*952T>A,NM_019477:c.*952T>A	NA	NA	UTR3	Acsl4	uc009ulu.1:c.*952T>A,uc009ulv.1:c.*952T>A,uc009ulw.1:c.*952T>A,uc012hps.1:c.*952T>A	NA	NA	UTR3	ENSMUSG00000031278	ENSMUST00000112907:c.*952T>A,ENSMUST00000112904:c.*952T>A,ENSMUST00000112903:c.*952T>A,ENSMUST00000033634:c.*952T>A	NA	NA	XqF2	NA	NA	-	TAAATTACAAATGTAATTTAA	chrX	142319725	CAAxTGT	A	T	66_S3_L001_R1_001	64_Jiri_S1_L001_R1_001	0	NOVEL	COVERED	0.999487	0.999487	1	1	1	199	0	-5.79647	9.29616	4.64886	4.4437	0.074074	0.02	0.781177
ACR_S9_1	chrX	157591477	157591477	A	C	exonic	Mbtps2	NA	synonymous SNV	Mbtps2:NM_172307:exon3:c.T303G:p.T101T	exonic	Mbtps2	NA	synonymous SNV	Mbtps2:uc009usb.1:exon3:c.T303G:p.T101T,Mbtps2:uc009usc.1:exon3:c.T303G:p.T101T,Mbtps2:uc012hra.1:exon3:c.T303G:p.T101T	exonic	ENSMUSG00000046873	NA	synonymous SNV	ENSMUSG00000046873:ENSMUST00000149249:exon2:c.T66G:p.T22T,ENSMUSG00000046873:ENSMUST00000058098:exon3:c.T303G:p.T101T,ENSMUSG00000046873:ENSMUST00000112522:exon3:c.T303G:p.T101T	XqF4	NA	NA	-	TTTGTGCCAAAGTCTGCATCA	chrX	157591477	CAAxGTC	A	C	66_S3_L001_R1_001	64_Jiri_S1_L001_R1_001	0	NOVEL	COVERED	0.717315	0.717315	1	1	1	90	0	43.1089	43.5777	24.9621	21.8999	0.633333	0.02	-0.262641
ACR_S9_1	chrX	51117266	51117266	A	T	UTR3	Mbnl3	NM_134163:c.*3741T>A	NA	NA	UTR3	Mbnl3	uc009tdt.1:c.*3741T>A,uc009tdu.1:c.*3741T>A,uc009tdv.1:c.*3741T>A	NA	NA	downstream	ENSMUSG00000036109	NA	NA	NA	XqA5	NA	NA	-	TTTTTTTTTTAAAGGTGGAGC	chrX	51117266	TTTxAAG	A	T	66_S3_L001_R1_001	64_Jiri_S1_L001_R1_001	0	NOVEL	COVERED	0.552886	0.552887	0.999997	0.999997	0.99963	54	0	5.58555	8.03573	9.53575	0	0.166667	0.02	-0.216965
ACR_S9_1	chrX	73895457	73895457	C	T	intronic	Arhgap4	NA	NA	NA	intronic	Arhgap4	NA	NA	NA	UTR3	ENSMUSG00000031390	ENSMUST00000101470:c.*1603C>T	NA	NA	XqA7.3	NA	NA	-	TCTATAGGGTCTCACAGAACC	chrX	73895457	GGTxTCA	C	T	66_S3_L001_R1_001	64_Jiri_S1_L001_R1_001	0	NOVEL	COVERED	0.739671	0.739671	1	1	0.999998	79	0	77.7547	82.1818	42.8808	43.4248	0.875	0.02	-0.280298
ACR_S9_1	chrX	83904950	83904950	T	A	exonic	Dmd	NA	synonymous SNV	Dmd:NM_007868:exon35:c.T4854A:p.A1618A	exonic	Dmd	NA	synonymous SNV	Dmd:uc009tri.2:exon35:c.T4854A:p.A1618A	exonic	ENSMUSG00000045103	NA	synonymous SNV	ENSMUSG00000045103:ENSMUST00000114000:exon35:c.T4854A:p.A1618A	XqC1	NA	NA	+	TCCTACAGGCTACTCAAAAAG	chrX	83904950	GGCxACT	T	A	66_S3_L001_R1_001	64_Jiri_S1_L001_R1_001	0	NOVEL	COVERED	0.522161	0.522161	1	1	1	140	0	4.17335	6.51257	6.49529	2.20061	0.173913	0.02	-0.210047
ACR_S9_1	chrX	147471924	147471924	C	T	UTR3	Lrch2	NM_001081173:c.*1033G>A	NA	NA	UTR3	Lrch2	uc009uni.1:c.*1033G>A,uc009unj.1:c.*1033G>A,uc009unk.1:c.*1033G>A	NA	NA	UTR3	ENSMUSG00000031290	ENSMUST00000152838:c.*1033G>A,ENSMUST00000136789:c.*1033G>A,ENSMUST00000112819:c.*1033G>A	NA	NA	XqF2	NA	NA	-	TGAATCAAAACCTGTTTTTTT	chrX	147471924	AAAxCTG	C	T	66_S3_L001_R1_001	70_S7_L001_R1_001	0	NOVEL	COVERED	0.999881	0.999881	1	1	1	252	0	-9.49296	7.54662	8.50654	0	0.068182	0.02	0.598084
ACR_S9_1	chrX	71970775	71970775	A	T	UTR3	Prrg3	NM_001081135:c.*3191A>T	NA	NA	UTR3	Prrg3	uc012hjt.1:c.*3191A>T,uc009tkh.1:c.*3191A>T	NA	NA	UTR3	ENSMUSG00000033361	ENSMUST00000048790:c.*3191A>T	NA	NA	XqA7.3	NA	NA	+	TGTGTGTGAGAGAGAGAGAGA	chrX	71970775	GAGxGAG	A	T	66_S3_L001_R1_001	70_S7_L001_R1_001	0	NOVEL	COVERED	0.260965	0.260965	0.999998	0.999998	0.999763	51	1	6.99503	7.73362	2.89771	4.89249	0.266667	0.02	-0.140042
ACR_S9_1	chrX	56495727	56495727	T	A	intronic	Ddx26b	NA	NA	NA	UTR5;UTR3	Ddx26b;Ddx26b	uc009tgh.2:c.-2206T>A;uc009tgf.2:c.*2546T>A	NA	NA	intronic	ENSMUSG00000035967	NA	NA	NA	XqA6	NA	NA	+	TCATAAAAACTAAAAAAAAAA	chrX	56495727	AACxAAA	T	A	66_S3_L001_R1_001	E210_S1	0	NOVEL	COVERED	0.926638	0.92664	0.999998	0.999998	0.999725	78	0	2.08883	6.87415	0	7.7036	0.162791	0.02	-0.382325
ACR_S9_1	chrX	98944862	98944862	G	T	intronic	Yipf6	NA	NA	NA	UTR3	Yipf6	uc009tvd.1:c.*1916G>T	NA	NA	intronic	ENSMUSG00000047694	NA	NA	NA	XqC3	NA	NA	+	ACTCCTTTTTGTTTTCTTTAG	chrX	98944862	TTTxTTT	G	T	66_S3_L001_R1_001	E210_S1	0	NOVEL	COVERED	0.899311	0.899314	0.999997	0.999997	0.998875	70	0	1.98636	7.06227	7.26001	0	0.146341	0.02	-0.366629
ACR_S9_2	chr1	20534670	20534670	T	G	exonic	Pkhd1	NA	nonsynonymous SNV	Pkhd1:NM_153179:exon30:c.A3420C:p.Q1140H	exonic	Pkhd1	NA	nonsynonymous SNV	Pkhd1:uc007akv.1:exon30:c.A3420C:p.Q1140H	exonic	ENSMUSG00000043760	NA	nonsynonymous SNV	ENSMUSG00000043760:ENSMUST00000088448:exon30:c.A3420C:p.Q1140H	1qA4	NA	NA	-	GCACATGGATTTGCACATCCA	chr1	20534670	GATxTGC	T	G	75_S12_L001_R1_001	64_Jiri_S1_L001_R1_001	0	NOVEL	COVERED	0.865745	0.865745	1	1	1	100	0	0.187708	6.32087	2.37955	6.96807	0.102564	0.02	-0.341672
ACR_S9_2	chr1	20534675	20534675	C	A	exonic	Pkhd1	NA	nonsynonymous SNV	Pkhd1:NM_153179:exon30:c.G3415T:p.V1139L	exonic	Pkhd1	NA	nonsynonymous SNV	Pkhd1:uc007akv.1:exon30:c.G3415T:p.V1139L	exonic	ENSMUSG00000043760	NA	nonsynonymous SNV	ENSMUSG00000043760:ENSMUST00000088448:exon30:c.G3415T:p.V1139L	1qA4	NA	NA	-	TGGATTTGCACATCCAGATCT	chr1	20534675	GCAxATC	C	A	75_S12_L001_R1_001	64_Jiri_S1_L001_R1_001	0	NOVEL	COVERED	0.877708	0.877708	1	1	1	98	0	0.081773	6.47302	3.03371	6.82863	0.1	0.02	-0.35056
ACR_S9_2	chr1	37410242	37410242	G	T	UTR3	Inpp4a	NM_030266:c.*1983G>T,NM_001290797:c.*1983G>T	NA	NA	UTR3	Inpp4a	uc007arl.2:c.*1983G>T	NA	NA	UTR3	ENSMUSG00000026113	ENSMUST00000027287:c.*1983G>T,ENSMUST00000132615:c.*1983G>T	NA	NA	1qB	NA	NA	+	TCACAGAAAAGATTGTGGCTT	chr1	37410242	AAAxATT	G	T	75_S12_L001_R1_001	64_Jiri_S1_L001_R1_001	0	NOVEL	COVERED	0.877708	0.877708	1	1	1	99	0	42.7404	42.7908	30.296	27.754	0.461538	0.02	-0.350651
ACR_S9_2	chr1	51471217	51471217	A	T	UTR3	Nabp1	NM_028696:c.*28T>A	NA	NA	UTR3	Nabp1	uc007axn.1:c.*28T>A,uc007axo.1:c.*28T>A,uc007axp.1:c.*28T>A	NA	NA	UTR3	ENSMUSG00000026107	ENSMUST00000027279:c.*28T>A	NA	NA	1qC1.1	NA	NA	-	ATGTAGTTTAAAAACTACATG	chr1	51471217	TTAxAAA	A	T	75_S12_L001_R1_001	64_Jiri_S1_L001_R1_001	0	NOVEL	COVERED	0.851984	0.851984	1	1	0.999994	81	0	0.888282	6.76591	6.88174	3.48205	0.105263	0.02	-0.33293
ACR_S9_2	chr1	58299846	58299846	A	C	exonic	Aox2	NA	nonsynonymous SNV	Aox2:NM_001008419:exon11:c.A997C:p.T333P	exonic	Aox2	NA	nonsynonymous SNV	Aox2:uc007bbp.1:exon11:c.A997C:p.T333P	exonic	ENSMUSG00000079554	NA	nonsynonymous SNV	ENSMUSG00000079554:ENSMUST00000114366:exon11:c.A997C:p.T333P	1qC1.3	NA	NA	+	ACAGGAGAAAACTCAGACCTA	chr1	58299846	AAAxCTC	A	C	75_S12_L001_R1_001	64_Jiri_S1_L001_R1_001	0	NOVEL	COVERED	0.552537	0.552887	0.999366	0.999366	0	42	0	22.554	22.7689	15.7353	13.6766	0.4	0.02	-0.218852
ACR_S9_2	chr1	60235018	60235018	G	A	exonic	Nbeal1	NA	nonsynonymous SNV	Nbeal1:NM_173444:exon13:c.G1319A:p.G440D	exonic	Nbeal1	NA	nonsynonymous SNV	Nbeal1:uc007bej.1:exon13:c.G1319A:p.G440D	exonic	ENSMUSG00000073664	NA	nonsynonymous SNV	ENSMUSG00000073664:ENSMUST00000160980:exon6:c.G587A:p.G196D,ENSMUSG00000073664:ENSMUST00000160834:exon12:c.G1319A:p.G440D,ENSMUSG00000073664:ENSMUST00000035569:exon13:c.G1319A:p.G440D	1qC2	NA	NA	+	GGCATTTTGGGCATTAGTAAT	chr1	60235018	TGGxCAT	G	A	75_S12_L001_R1_001	E210_S1	0	NOVEL	COVERED	0.999968	0.999968	1	1	1	163	0	-11.7824	8.43955	0	8.87211	0.06	0.02	1.92257
ACR_S9_2	chr1	63183388	63183388	G	C	exonic	Gpr1	NA	nonsynonymous SNV	Gpr1:NM_146250:exon3:c.C687G:p.F229L	exonic	Gpr1	NA	nonsynonymous SNV	Gpr1:uc033fjd.1:exon1:c.C687G:p.F229L,Gpr1:uc007bga.3:exon3:c.C687G:p.F229L	exonic	ENSMUSG00000046856	NA	nonsynonymous SNV	ENSMUSG00000046856:ENSMUST00000050536:exon3:c.C687G:p.F229L	1qC2	NA	NA	-	TTTTCATCTTGAAGATGAGGC	chr1	63183388	CTTxAAG	G	C	75_S12_L001_R1_001	70_S7_L001_R1_001	0	NOVEL	COVERED	0.851984	0.851984	1	1	1	110	0	0.877451	6.76451	3.48399	3.29135	0.105263	0.02	-0.333154
ACR_S9_2	chr1	120068070	120068070	T	C	exonic	Tmem37	NA	synonymous SNV	Tmem37:NM_019432:exon2:c.A276G:p.L92L	exonic	Tmem37	NA	synonymous SNV	Tmem37:uc007cjd.1:exon2:c.A276G:p.L92L	exonic	ENSMUSG00000050777	NA	synonymous SNV	ENSMUSG00000050777:ENSMUST00000056089:exon2:c.A276G:p.L92L	1qE2.3	NA	NA	-	CACTGCGTGCTAGGCCCATGC	chr1	120068070	TGCxAGG	T	C	75_S12_L001_R1_001	E210_S1	0	NOVEL	COVERED	0.353946	0.353947	0.999997	0.999997	0.998875	47	0	6.99223	8.46414	0	8.80504	0.210526	0.02	-0.166566
ACR_S9_2	chr1	134887381	134887381	G	T	intronic	Ppp1r12b	NA	NA	NA	intronic	Ppp1r12b	NA	NA	NA	intronic	ENSMUSG00000073557	NA	NA	NA	1qE4	NA	NA	-	TAGAGAGAAAGGGGGAAAAGT	chr1	134887381	AAAxGGG	G	T	75_S12_L001_R1_001	64_Jiri_S1_L001_R1_001	0	NOVEL	COVERED	0.457755	0.457757	0.999997	0.999997	0.999693	54	0	40.6316	41.7177	23.3382	33.94	0.727273	0.02	-0.191707
ACR_S9_2	chr1	162544304	162544304	C	T	exonic	Mettl13	NA	nonsynonymous SNV	Mettl13:NM_144877:exon3:c.G995A:p.R332K	exonic	Mettl13	NA	nonsynonymous SNV	Mettl13:uc007dgh.1:exon3:c.G995A:p.R332K,Mettl13:uc007dgi.1:exon3:c.G995A:p.R332K	exonic	ENSMUSG00000026694	NA	nonsynonymous SNV	ENSMUSG00000026694:ENSMUST00000176220:exon1:c.G59A:p.R20K,ENSMUSG00000026694:ENSMUST00000159316:exon2:c.G382A:p.G128S,ENSMUSG00000026694:ENSMUST00000028017:exon3:c.G995A:p.R332K,ENSMUSG00000026694:ENSMUST00000159817:exon3:c.G517A:p.G173S	1qH2.1	NA	NA	-	TGTGACCAACCTCCTGAAGCC	chr1	162544304	AACxTCC	C	T	75_S12_L001_R1_001	64_Jiri_S1_L001_R1_001	0	NOVEL	UNCOVERED	0.043461	0.043787	0.99257	0.99257	0	15	0	7.12309	7.1543	0	7.16133	0.428571	0.02	-0.061371
ACR_S9_2	chr1	167001768	167001768	T	G	exonic	Fam78b	NA	nonsynonymous SNV	Fam78b:NM_001160261:exon1:c.T203G:p.V68G,Fam78b:NM_001160262:exon1:c.T203G:p.V68G,Fam78b:NM_175461:exon1:c.T203G:p.V68G	exonic	Fam78b	NA	nonsynonymous SNV	Fam78b:uc007dks.2:exon1:c.T203G:p.V68G,Fam78b:uc007dkt.2:exon1:c.T203G:p.V68G,Fam78b:uc011wvo.1:exon1:c.T203G:p.V68G	exonic	ENSMUSG00000060568	NA	nonsynonymous SNV	ENSMUSG00000060568:ENSMUST00000126198:exon1:c.T203G:p.V68G,ENSMUSG00000060568:ENSMUST00000156025:exon1:c.T203G:p.V68G,ENSMUSG00000060568:ENSMUST00000165874:exon1:c.T203G:p.V68G	1qH2.3	NA	NA	+	ACCTGGGTGGTGGGCTGGATC	chr1	167001768	TGGxGGG	T	G	75_S12_L001_R1_001	64_Jiri_S1_L001_R1_001	0	NOVEL	COVERED	0.2608	0.260965	0.999366	0.999366	0	33	0	19.9101	19.9101	12.8138	12.5982	0.5	0.02	-0.140006
ACR_S9_2	chr1	172698823	172698823	G	T	exonic	Crp	NA	nonsynonymous SNV	Crp:NM_007768:exon2:c.G474T:p.Q158H	exonic	Crp	NA	nonsynonymous SNV	Crp:uc011wwq.1:exon2:c.G474T:p.Q158H	exonic	ENSMUSG00000037942	NA	nonsynonymous SNV	ENSMUSG00000037942:ENSMUST00000038495:exon2:c.G474T:p.Q158H	1qH3	NA	NA	+	GGCAGGAGCAGGACTCGTATG	chr1	172698823	GCAxGAC	G	T	75_S12_L001_R1_001	64_Jiri_S1_L001_R1_001	0	NOVEL	COVERED	0.612399	0.612407	0.999988	0.999988	0.996292	54	0	10.4383	12.3546	3.5397	12.8316	0.222222	0.02	-0.236698
ACR_S9_2	chr1	177109755	177109755	G	T	intronic	Akt3	NA	NA	NA	intronic	Akt3	NA	NA	NA	intronic	ENSMUSG00000019699	NA	NA	NA	1qH4	NA	NA	-	ATAAAATTAAGTATCTCTTTA	chr1	177109755	TAAxTAT	G	T	75_S12_L001_R1_001	64_Jiri_S1_L001_R1_001	0	NOVEL	COVERED	1	1	1	1	1	312	0	-17.793	12.8303	5.649	13.3842	0.059603	0.02	3.16801
ACR_S9_2	chr2	17400562	17400562	T	C	intronic	Nebl	NA	NA	NA	exonic	Nebl	NA	nonsynonymous SNV	Nebl:uc008ilg.1:exon12:c.A1145G:p.E382G,Nebl:uc008ile.1:exon13:c.A1145G:p.E382G,Nebl:uc008ilf.1:exon13:c.A1145G:p.E382G	exonic	ENSMUSG00000053702	NA	nonsynonymous SNV	ENSMUSG00000053702:ENSMUST00000145492:exon12:c.A1145G:p.E382G,ENSMUSG00000053702:ENSMUST00000124270:exon13:c.A1250G:p.E417G,ENSMUSG00000053702:ENSMUST00000131957:exon13:c.A1145G:p.E382G,ENSMUSG00000053702:ENSMUST00000132418:exon13:c.A1145G:p.E382G	2qA3	NA	NA	-	GATTTCATTTTCCAGATCTTT	chr2	17400562	TTTxCCA	T	C	75_S12_L001_R1_001	64_Jiri_S1_L001_R1_001	0	NOVEL	COVERED	0.92664	0.92664	1	1	0.999995	90	0	30.0328	31.3269	8.13852	27.1289	0.318182	0.02	-0.394479
ACR_S9_2	chr2	27016361	27016361	T	C	UTR3	Cacfd1	NM_001243240:c.*748T>C,NM_001243239:c.*349T>C	NA	NA	UTR3	Cacfd1	uc008iwq.2:c.*349T>C,uc008iws.2:c.*748T>C,uc008iwr.2:c.*903T>C	NA	NA	UTR3	ENSMUSG00000015488	ENSMUST00000114005:c.*349T>C,ENSMUST00000114004:c.*748T>C	NA	NA	2qA3	NA	NA	+	CATGCGTACATACAGGTGGGT	chr2	27016361	ACAxACA	T	C	75_S12_L001_R1_001	64_Jiri_S1_L001_R1_001	0	NOVEL	COVERED	0.717314	0.717315	0.999998	0.999998	0.999763	65	0	2.41545	6.54551	7.57011	0	0.129032	0.02	-0.271061
ACR_S9_2	chr2	69670323	69670323	A	T	exonic	Klhl41	NA	nonsynonymous SNV	Klhl41:NM_001081087:exon1:c.A127T:p.S43C	exonic	Klhl41	NA	nonsynonymous SNV	Klhl41:uc008jyg.1:exon1:c.A127T:p.S43C	exonic	ENSMUSG00000075307	NA	nonsynonymous SNV	ENSMUSG00000075307:ENSMUST00000100050:exon1:c.A127T:p.S43C	2qC2	NA	NA	+	AGGTGACAAAAGTTTTCCTTG	chr2	69670323	AAAxGTT	A	T	75_S12_L001_R1_001	64_Jiri_S1_L001_R1_001	0	NOVEL	COVERED	1	1	1	1	1	305	0	155.082	155.125	95.7462	106.525	0.481481	0.02	1.80862
ACR_S9_2	chr2	84376369	84376369	T	G	UTR5	Calcrl	NM_018782:c.-1024A>C	NA	NA	UTR5	Calcrl	uc008kii.3:c.-1024A>C	NA	NA	UTR5	ENSMUSG00000059588	ENSMUST00000074262:c.-1024A>C	NA	NA	2qD	NA	NA	-	GCTGCAGCTGTTCTTGTCAAT	chr2	84376369	CTGxTCT	T	G	75_S12_L001_R1_001	64_Jiri_S1_L001_R1_001	0	NOVEL	COVERED	0.999907	0.999907	1	1	1	220	0	133.194	133.426	105.549	35.1232	0.553191	0.02	0.773331
ACR_S9_2	chr2	94425788	94425788	C	T	exonic	Api5	NA	nonsynonymous SNV	Api5:NM_007466:exon6:c.G553A:p.D185N	exonic	Api5	NA	nonsynonymous SNV	Api5:uc008lgx.1:exon6:c.G553A:p.D185N,Api5:uc008lgy.1:exon6:c.G553A:p.D185N	exonic	ENSMUSG00000027193	NA	nonsynonymous SNV	ENSMUSG00000027193:ENSMUST00000028617:exon6:c.G553A:p.D185N	2qE1	NA	NA	-	CCAGTCACGTCTTCTAGGACC	chr2	94425788	CGTxTTC	C	T	75_S12_L001_R1_001	64_Jiri_S1_L001_R1_001	0	NOVEL	COVERED	0.58293	0.58293	1	1	0.999912	63	0	4.58895	7.56599	3.90805	7.78248	0.153846	0.02	-0.227889
ACR_S9_2	chr2	109093307	109093307	T	G	intronic	Mettl15	NA	NA	NA	intronic	Mettl15	NA	NA	NA	intronic	ENSMUSG00000057234	NA	NA	NA	2qE3	NA	NA	-	CCTAGAGAGATTTTGTAAGAA	chr2	109093307	AGAxTTT	T	G	75_S12_L001_R1_001	64_Jiri_S1_L001_R1_001	0	NOVEL	COVERED	0.717315	0.717315	1	1	0.999994	75	0	19.8106	20.5636	5.22836	20.3271	0.333333	0.02	-0.271422
ACR_S9_2	chr2	119104764	119104764	A	C	downstream	Casc5	NA	NA	NA	downstream	Casc5	NA	NA	NA	UTR3	ENSMUSG00000027326	ENSMUST00000028802:c.*687A>C	NA	NA	2qE5	NA	NA	+	ACAAAGATTAAGCCTTTCCTC	chr2	119104764	TTAxGCC	A	C	75_S12_L001_R1_001	E210_S1	0	NOVEL	COVERED	1	1	1	1	1	1812	0	119.302	204.363	164.034	66.0326	0.165195	0.02	19.7094
ACR_S9_2	chr2	125771426	125771426	T	G	exonic	Secisbp2l	NA	nonsynonymous SNV	Secisbp2l:NM_177608:exon4:c.A647C:p.D216A	exonic	Secisbp2l	NA	nonsynonymous SNV	Secisbp2l:uc008mcz.1:exon4:c.A647C:p.D216A	exonic	ENSMUSG00000035093	NA	nonsynonymous SNV	ENSMUSG00000035093:ENSMUST00000053699:exon4:c.A647C:p.D216A	2qF1	NA	NA	-	CTGTGAAGCATCTACCAGAAG	chr2	125771426	GCAxCTA	T	G	75_S12_L001_R1_001	64_Jiri_S1_L001_R1_001	0	NOVEL	COVERED	0.641347	0.641347	1	1	1	105	0	13.7252	15.3079	11.1066	6.30187	0.25	0.02	-0.24525
ACR_S9_2	chr2	126124585	126124585	T	C	exonic	Fam227b	NA	nonsynonymous SNV	Fam227b:NM_029455:exon6:c.A406G:p.I136V	exonic	Fam227b	NA	nonsynonymous SNV	Fam227b:uc012cde.2:exon6:c.A406G:p.I136V	exonic	ENSMUSG00000027209	NA	nonsynonymous SNV	ENSMUSG00000027209:ENSMUST00000178118:exon5:c.A406G:p.I136V,ENSMUSG00000027209:ENSMUST00000110446:exon6:c.A406G:p.I136V,ENSMUSG00000027209:ENSMUST00000110448:exon6:c.A406G:p.I136V	2qF1	NA	NA	-	AATACCTCTATATTCTTCTCT	chr2	126124585	CTAxATT	T	C	75_S12_L001_R1_001	64_Jiri_S1_L001_R1_001	0	NOVEL	COVERED	1	1	1	1	1	1127	0	135.959	178.76	123.258	93.7585	0.190377	0.02	10.1618
ACR_S9_2	chr2	130706439	130706439	A	C	intergenic	Slc4a11,4930402H24Rik	dist=8920;dist=1414	NA	NA	intergenic	Slc4a11,4930402H24Rik	dist=8920;dist=1414	NA	NA	UTR3	ENSMUSG00000027309	ENSMUST00000044766:c.*2761T>G	NA	NA	2qF1	NA	NA	NA	TTAAAATTTAAGTTACAAATA	chr2	130706439	TTAxGTT	A	C	75_S12_L001_R1_001	64_Jiri_S1_L001_R1_001	0	NOVEL	COVERED	1	1	1	1	1	1438	0	156.957	207.367	122.561	114.099	0.207006	0.02	11.3126
ACR_S9_2	chr2	139833589	139833589	G	A	UTR3	Tasp1	NM_175225:c.*766C>T,NM_001159641:c.*766C>T,NM_001159640:c.*766C>T	NA	NA	UTR3	Tasp1	uc008mpg.3:c.*766C>T,uc008mpi.3:c.*766C>T,uc008mpl.3:c.*766C>T	NA	NA	UTR3	ENSMUSG00000039033	ENSMUST00000110079:c.*766C>T,ENSMUST00000046656:c.*766C>T,ENSMUST00000099304:c.*766C>T	NA	NA	2qF3	NA	NA	-	CTTATTTACAGTGTTACATTG	chr2	139833589	ACAxTGT	G	A	75_S12_L001_R1_001	E210_S1	0	NOVEL	COVERED	1	1	1	1	1	518	0	-22.4835	23.6405	13.7131	11.0492	0.067227	0.02	3.59869
ACR_S9_2	chr2	139833593	139833593	T	A	UTR3	Tasp1	NM_175225:c.*762A>T,NM_001159641:c.*762A>T,NM_001159640:c.*762A>T	NA	NA	UTR3	Tasp1	uc008mpg.3:c.*762A>T,uc008mpi.3:c.*762A>T,uc008mpl.3:c.*762A>T	NA	NA	UTR3	ENSMUSG00000039033	ENSMUST00000110079:c.*762A>T,ENSMUST00000046656:c.*762A>T,ENSMUST00000099304:c.*762A>T	NA	NA	2qF3	NA	NA	-	TTTACAGTGTTACATTGTAAA	chr2	139833593	TGTxACA	T	A	75_S12_L001_R1_001	E210_S1	0	NOVEL	COVERED	1	1	1	1	1	519	0	-24.0025	22.713	13.0615	10.1391	0.066667	0.02	3.48427
ACR_S9_2	chr2	163446018	163446018	A	G	intronic	Gdap1l1	NA	NA	NA	UTR5	Gdap1l1	uc012ciq.1:c.-103A>G	NA	NA	intronic	ENSMUSG00000017943	NA	NA	NA	2qH3	NA	NA	+	CCCCGCTCTGACCCTGGCGCC	chr2	163446018	CTGxCCC	A	G	75_S12_L001_R1_001	64_Jiri_S1_L001_R1_001	0	NOVEL	UNCOVERED	0.0768	0.077336	0.993072	0.993072	0	20	0	16.4565	16.4408	13.5654	2.87539	1	0.02	-0.07876
ACR_S9_2	chr2	169912674	169912674	T	G	intergenic	Tshz2,A630075F10Rik	dist=24170;dist=148566	NA	NA	UTR3	Tshz2	uc008obp.2:c.*75T>G,uc008obs.1:c.*65T>G	NA	NA	UTR3	ENSMUSG00000047907	ENSMUST00000109159:c.*75T>G,ENSMUST00000140699:c.*65T>G	NA	NA	2qH3	NA	NA	NA	TGCTGCGGGTTGACCAGACTG	chr2	169912674	GGTxGAC	T	G	75_S12_L001_R1_001	70_S7_L001_R1_001	0	NOVEL	UNCOVERED	0.043483	0.043787	0.993072	0.993072	0	18	0	7.12331	7.15447	7.42398	0	0.428571	0.02	-0.061367
ACR_S9_2	chr2	180544218	180544218	T	G	UTR3	Ntsr1	NM_018766:c.*1438T>G	NA	NA	UTR3	Ntsr1	uc012cmd.1:c.*1127T>G,uc008ojg.1:c.*1438T>G	NA	NA	UTR3	ENSMUSG00000027568	ENSMUST00000029084:c.*1438T>G,ENSMUST00000170448:c.*1127T>G	NA	NA	2qH4	NA	NA	+	ATGGGGAGGGTGTTCAAGTAC	chr2	180544218	GGGxGTT	T	G	75_S12_L001_R1_001	E210_S1	0	NOVEL	COVERED	0.899314	0.899314	1	1	0.999998	89	0	-0.091954	6.53093	1.5164	7.31874	0.097561	0.02	-0.367532
ACR_S9_2	chr3	40672561	40672561	T	G	intronic	Intu	NA	NA	NA	intronic	Intu	NA	NA	NA	intronic	ENSMUSG00000060798	NA	NA	NA	3qB	NA	NA	+	TTCTGTTTTCTTCTTTTCAGG	chr3	40672561	TTCxTCT	T	G	75_S12_L001_R1_001	64_Jiri_S1_L001_R1_001	0	NOVEL	COVERED	0.954491	0.954491	1	1	1	147	0	3.91976	8.4107	3.74574	3.98273	0.153846	0.02	-0.420425
ACR_S9_2	chr3	51517607	51517607	C	G	UTR3	Setd7	NM_080793:c.*3700G>C	NA	NA	UTR3	Setd7	uc008peb.1:c.*3700G>C	NA	NA	UTR3	ENSMUSG00000037111	ENSMUST00000037141:c.*3700G>C	NA	NA	3qC	NA	NA	-	CTTTAATTGTCACAATTAAAT	chr3	51517607	TGTxACA	C	G	75_S12_L001_R1_001	E210_S1	0	NOVEL	COVERED	0.999487	0.999487	1	1	1	155	0	0.216172	13.7137	4.72074	9.09324	0.096386	0.02	0.773692
ACR_S9_2	chr3	68915001	68915001	A	G	intronic	Ift80	NA	NA	NA	intronic	Ift80	NA	NA	NA	intronic	ENSMUSG00000027778	NA	NA	NA	3qE1	NA	NA	-	AAACATGAAAAGAATTGTCTT	chr3	68915001	AAAxGAA	A	G	75_S12_L001_R1_001	64_Jiri_S1_L001_R1_001	0	NOVEL	COVERED	0.486967	0.490544	0.992708	0.992708	0	33	0	14.9168	15.7024	8.93187	13.3865	0.304348	0.02	-0.201644
ACR_S9_2	chr3	69034023	69034023	G	A	exonic	Smc4	NA	nonsynonymous SNV	Smc4:NM_133786:exon23:c.G3610A:p.A1204T	exonic	Smc4	NA	nonsynonymous SNV	Smc4:uc008pma.1:exon23:c.G3610A:p.A1204T,Smc4:uc008pmb.1:exon23:c.G3400A:p.A1134T	exonic	ENSMUSG00000034349	NA	nonsynonymous SNV	ENSMUSG00000034349:ENSMUST00000042901:exon23:c.G3610A:p.A1204T,ENSMUSG00000034349:ENSMUST00000107803:exon23:c.G3535A:p.A1179T	3qE1	NA	NA	+	CTTAGTGTTTGCTCTTCATCA	chr3	69034023	TTTxCTC	G	A	75_S12_L001_R1_001	64_Jiri_S1_L001_R1_001	0	NOVEL	COVERED	0.993703	0.993703	1	1	1	169	0	1.69578	11.6134	6.42907	6.6188	0.107692	0.02	0.833667
ACR_S9_2	chr3	72922925	72922925	G	A	exonic	Sis	NA	nonsynonymous SNV	Sis:NM_001081137:exon27:c.C3292T:p.P1098S	exonic	Sis	NA	nonsynonymous SNV	Sis:uc008pmq.1:exon27:c.C3292T:p.P1098S,Sis:uc012cqn.1:exon28:c.C3292T:p.P1098S	exonic	ENSMUSG00000027790	NA	nonsynonymous SNV	ENSMUSG00000027790:ENSMUST00000094190:exon27:c.C3292T:p.P1098S,ENSMUSG00000027790:ENSMUST00000167334:exon28:c.C3292T:p.P1098S	3qE3	NA	NA	-	TATTGTGATGGCAGACGTGTA	chr3	72922925	ATGxCAG	G	A	75_S12_L001_R1_001	64_Jiri_S1_L001_R1_001	0	NOVEL	COVERED	0.641346	0.641347	0.999999	0.999999	0.999806	63	0	5.66363	8.39611	5.56629	4.42338	0.178571	0.02	-0.24507
ACR_S9_2	chr3	88101446	88101446	C	T	exonic	Iqgap3	NA	nonsynonymous SNV	Iqgap3:NM_001033484:exon17:c.C1847T:p.A616V	exonic	Iqgap3	NA	nonsynonymous SNV	Iqgap3:uc008pty.1:exon17:c.C1847T:p.A616V	exonic	ENSMUSG00000028068	NA	nonsynonymous SNV	ENSMUSG00000028068:ENSMUST00000071812:exon17:c.C1847T:p.A616V	3qF1	NA	NA	+	GGTGTGGCTGCTATCAACCAG	chr3	88101446	CTGxTAT	C	T	75_S12_L001_R1_001	64_Jiri_S1_L001_R1_001	0	NOVEL	UNCOVERED	0.053793	0.054137	0.993634	0.993634	0	20	0	6.82261	6.93241	7.42402	0	0.375	0.02	-0.070135
ACR_S9_2	chr3	89230404	89230404	C	T	exonic	Muc1	NA	synonymous SNV	Muc1:NM_013605:exon2:c.C552T:p.P184P	exonic	Muc1	NA	synonymous SNV	Muc1:uc008pyh.2:exon2:c.C552T:p.P184P	exonic	ENSMUSG00000042784	NA	synonymous SNV	ENSMUSG00000042784:ENSMUST00000041142:exon2:c.C552T:p.P184P	3qF1	NA	NA	+	CCAGAGCTCCCGAAGACTCTA	chr3	89230404	TCCxGAA	C	T	75_S12_L001_R1_001	64_Jiri_S1_L001_R1_001	0	NOVEL	COVERED	0.993703	0.993703	1	1	1	180	0	-3.20522	8.0311	11.0296	4.11404	0.079365	0.02	0.933586
ACR_S9_2	chr3	89747544	89747544	G	C	exonic	Adar	NA	synonymous SNV	Adar:NM_001038587:exon11:c.G1995C:p.A665A,Adar:NM_001146296:exon11:c.G2739C:p.A913A,Adar:NM_019655:exon11:c.G2661C:p.A887A	exonic	Adar	NA	synonymous SNV	Adar:uc008pzy.2:exon10:c.G1107C:p.A369A,Adar:uc008pzz.2:exon10:c.G1185C:p.A395A,Adar:uc008pzv.2:exon11:c.G1995C:p.A665A,Adar:uc008pzw.2:exon11:c.G2661C:p.A887A,Adar:uc008pzx.2:exon11:c.G2739C:p.A913A	exonic	ENSMUSG00000027951	NA	synonymous SNV	ENSMUSG00000027951:ENSMUST00000118341:exon10:c.G1185C:p.A395A,ENSMUSG00000027951:ENSMUST00000121094:exon10:c.G1107C:p.A369A,ENSMUSG00000027951:ENSMUST00000029563:exon11:c.G2661C:p.A887A,ENSMUSG00000027951:ENSMUST00000098924:exon11:c.G1995C:p.A665A,ENSMUSG00000027951:ENSMUST00000107405:exon11:c.G2739C:p.A913A	3qF1	NA	NA	+	GCAGCACGGCGCCATGTGGAG	chr3	89747544	GGCxCCA	G	C	75_S12_L001_R1_001	64_Jiri_S1_L001_R1_001	0	NOVEL	COVERED	0.967425	0.967425	1	1	1	154	0	21.6474	23.8347	24.5875	3.07777	0.28	0.02	1.14547
ACR_S9_2	chr3	96220605	96220605	G	A	exonic	Hist2h2ac	NA	synonymous SNV	Hist2h2ac:NM_175662:exon1:c.C240T:p.I80I	exonic	Hist2h2ac	NA	synonymous SNV	Hist2h2ac:uc008qmi.1:exon1:c.C240T:p.I80I	exonic	ENSMUSG00000068855	NA	synonymous SNV	ENSMUSG00000068855:ENSMUST00000090782:exon1:c.C240T:p.I80I	3qF2.1	NA	NA	-	GATGGCGCGGGATGATGCGCG	chr3	96220605	CGGxATG	G	A	75_S12_L001_R1_001	64_Jiri_S1_L001_R1_001	0	NOVEL	COVERED	0.899314	0.899314	1	1	1	142	3	8.84615	12.6822	0	12.8637	0.190476	0.02	-0.367004
ACR_S9_2	chr3	117321955	117321955	C	A	exonic	Lppr4	NA	nonsynonymous SNV	Lppr4:NM_177664:exon7:c.G2252T:p.R751I	exonic	D3Bwg0562e	NA	nonsynonymous SNV	D3Bwg0562e:uc012cww.2:exon6:c.G1457T:p.R486I,D3Bwg0562e:uc008rcz.2:exon7:c.G2252T:p.R751I	exonic	ENSMUSG00000044667	NA	nonsynonymous SNV	ENSMUSG00000044667:ENSMUST00000061071:exon7:c.G2252T:p.R751I	3qG1	NA	NA	-	GAAGATGTTTCTTGTGTTTTC	chr3	117321955	TTTxTTG	C	A	75_S12_L001_R1_001	64_Jiri_S1_L001_R1_001	0	NOVEL	COVERED	0.998696	0.998696	1	1	1	205	0	27.3646	32.2882	12.0493	25.7907	0.225352	0.02	0.833696
ACR_S9_2	chr4	53090246	53090246	C	A	intronic	Abca1	NA	NA	NA	intronic	Abca1	NA	NA	NA	intronic	ENSMUSG00000015243	NA	NA	NA	4qB2	NA	NA	-	TAAGCCTGGACAGCTTACCTC	chr4	53090246	GGAxAGC	C	A	75_S12_L001_R1_001	64_Jiri_S1_L001_R1_001	0	NOVEL	UNCOVERED	0.019869	0.019982	0.994391	0.994391	0	17	0	8.05913	8.25432	8.25432	0	0.75	0.02	-0.035055
ACR_S9_2	chr4	117108969	117108969	T	G	intronic	Ptch2	NA	NA	NA	intronic	Ptch2	NA	NA	NA	intronic	ENSMUSG00000028681	NA	NA	NA	4qD1	NA	NA	+	ATCCACCAGCTTGAACCCATC	chr4	117108969	AGCxTGA	T	G	75_S12_L001_R1_001	64_Jiri_S1_L001_R1_001	0	NOVEL	COVERED	0.292001	0.292001	1	1	0.999997	63	0	22.7399	22.8542	12.3546	16.8945	0.588235	0.02	-0.148931
ACR_S9_2	chr4	131925192	131925192	C	T	UTR3	Epb4.1	NM_001128607:c.*748G>A,NM_001128606:c.*748G>A,NM_183428:c.*748G>A	NA	NA	UTR3	Epb4.1	uc008vak.3:c.*748G>A,uc008val.3:c.*748G>A,uc012dma.2:c.*748G>A,uc008vam.3:c.*748G>A,uc008van.3:c.*748G>A	NA	NA	UTR3	ENSMUSG00000028906	ENSMUST00000105970:c.*748G>A,ENSMUST00000105975:c.*748G>A,ENSMUST00000105974:c.*748G>A,ENSMUST00000054917:c.*748G>A,ENSMUST00000135579:c.*748G>A,ENSMUST00000137846:c.*748G>A,ENSMUST00000146443:c.*748G>A,ENSMUST00000155990:c.*748G>A,ENSMUST00000030739:c.*748G>A,ENSMUST00000105981:c.*748G>A,ENSMUST00000084253:c.*748G>A	NA	NA	4qD2.3	NA	NA	-	CACTTTTAGCCAAAAGTGCCT	chr4	131925192	AGCxAAA	C	T	75_S12_L001_R1_001	70_S7_L001_R1_001	0	NOVEL	COVERED	0.999978	0.999978	1	1	1	288	0	-12.4123	8.65629	8.18264	3.82042	0.058252	0.02	2.09706
ACR_S9_2	chr4	132704441	132704441	C	A	intronic	Eya3	NA	NA	NA	intronic	Eya3	NA	NA	NA	intronic	ENSMUSG00000028886	NA	NA	NA	4qD2.3	NA	NA	+	TGAACATCAGCACACCCAGGA	chr4	132704441	CAGxACA	C	A	75_S12_L001_R1_001	64_Jiri_S1_L001_R1_001	0	NOVEL	COVERED	0.522161	0.522161	1	1	1	76	0	5.20189	7.71922	0	8.27373	0.166667	0.02	-0.210116
ACR_S9_2	chr4	132733609	132733609	G	C	exonic	Smpdl3b	NA	nonsynonymous SNV	Smpdl3b:NM_133888:exon8:c.C1156G:p.P386A	exonic	Smpdl3b	NA	nonsynonymous SNV	Smpdl3b:uc008vbs.1:exon8:c.C1156G:p.P386A	exonic	ENSMUSG00000028885	NA	nonsynonymous SNV	ENSMUSG00000028885:ENSMUST00000030709:exon8:c.C1156G:p.P386A	4qD2.3	NA	NA	-	AGGATGTGAGGCTCACTGGCA	chr4	132733609	GAGxCTC	G	C	75_S12_L001_R1_001	64_Jiri_S1_L001_R1_001	0	NOVEL	COVERED	0.322806	0.322807	0.999997	0.999997	0.99963	47	0	16.3208	16.5153	11.9927	4.63594	0.388889	0.02	-0.15779
ACR_S9_2	chr4	154970926	154970926	A	G	exonic	Pank4	NA	nonsynonymous SNV	Pank4:NM_172990:exon6:c.A752G:p.D251G	exonic	Pank4	NA	nonsynonymous SNV	Pank4:uc008wcl.2:exon6:c.A752G:p.D251G,Pank4:uc012dqn.1:exon6:c.A752G:p.D251G	exonic	ENSMUSG00000029056	NA	nonsynonymous SNV	ENSMUSG00000029056:ENSMUST00000030931:exon6:c.A752G:p.D251G,ENSMUSG00000029056:ENSMUST00000070953:exon6:c.A752G:p.D251G	4qE2	NA	NA	+	GCCAACGTTGACATGCTGGTC	chr4	154970926	TTGxCAT	A	G	75_S12_L001_R1_001	64_Jiri_S1_L001_R1_001	0	NOVEL	UNCOVERED	0.043483	0.043787	0.993072	0.993072	0	18	0	7.02333	7.05447	7.05474	0	0.428571	0.02	-0.061362
ACR_S9_2	chr5	23740892	23740892	T	C	UTR3	Pus7	NM_001289781:c.*948A>G,NM_001289780:c.*948A>G,NM_178403:c.*948A>G	NA	NA	UTR3	Pus7	uc033ihx.1:c.*948A>G,uc012dsw.2:c.*948A>G,uc008wqo.2:c.*948A>G	NA	NA	UTR3	ENSMUSG00000057541	ENSMUST00000119946:c.*948A>G,ENSMUST00000148618:c.*948A>G,ENSMUST00000131992:c.*948A>G	NA	NA	5qA3	NA	NA	-	CCTTCTTCTTTTTTTTTTTTT	chr5	23740892	CTTxTTT	T	C	75_S12_L001_R1_001	E210_S1	0	NOVEL	COVERED	0.999999	0.999999	1	1	1	276	0	8.34792	16.5561	10.1005	14.9344	0.138462	0.02	1.90627
ACR_S9_2	chr5	77284497	77284497	G	T	downstream	Rest	NA	NA	NA	downstream	Rest	NA	NA	NA	UTR3	ENSMUSG00000029249	ENSMUST00000080359:c.*1513G>T,ENSMUST00000113449:c.*1513G>T	NA	NA	5qC3.3	NA	NA	+	GTGCTCTCCAGAACATGAAAG	chr5	77284497	CCAxAAC	G	T	75_S12_L001_R1_001	64_Jiri_S1_L001_R1_001	0	NOVEL	COVERED	0.998696	0.998696	1	1	1	204	0	0.506802	11.9309	10.5438	5.01376	0.098592	0.02	0.83457
ACR_S9_2	chr5	88758147	88758147	C	A	UTR3	Mob1b	NM_026735:c.*1975C>A	NA	NA	UTR3	Mob1b	uc008yaf.1:c.*1975C>A,uc012dyb.1:c.*1975C>A	NA	NA	UTR3	ENSMUSG00000006262	ENSMUST00000113229:c.*1975C>A	NA	NA	5qE1	NA	NA	+	TGATTCCTGTCTATACAGGAA	chr5	88758147	TGTxTAT	C	A	75_S12_L001_R1_001	E210_S1	0	NOVEL	COVERED	1	1	1	1	1	380	0	-31.1484	12.541	6.69517	5.28213	0.04902	0.02	3.30425
ACR_S9_2	chr5	88758150	88758150	T	G	UTR3	Mob1b	NM_026735:c.*1978T>G	NA	NA	UTR3	Mob1b	uc008yaf.1:c.*1978T>G,uc012dyb.1:c.*1978T>G	NA	NA	UTR3	ENSMUSG00000006262	ENSMUST00000113229:c.*1978T>G	NA	NA	5qE1	NA	NA	+	TTCCTGTCTATACAGGAAATG	chr5	88758150	CTAxACA	T	G	75_S12_L001_R1_001	E210_S1	0	NOVEL	COVERED	1	1	1	1	1	378	0	-31.3642	13.445	7.12971	5.75118	0.048309	0.02	3.67898
ACR_S9_2	chr5	103853048	103853048	G	C	UTR3	Aff1	NM_133919:c.*2225G>C,NM_001080798:c.*2225G>C	NA	NA	UTR3	Aff1	uc008yjt.1:c.*2225G>C,uc008yju.1:c.*2225G>C	NA	NA	UTR3	ENSMUSG00000029313	ENSMUST00000054979:c.*2225G>C,ENSMUST00000031256:c.*2225G>C	NA	NA	5qE5	NA	NA	+	CTTACCAGAGGCAAATTTTCC	chr5	103853048	GAGxCAA	G	C	75_S12_L001_R1_001	64_Jiri_S1_L001_R1_001	0	NOVEL	COVERED	0.999622	0.999622	1	1	1	220	0	100.768	100.768	84.8216	21.9641	0.5	0.02	0.854333
ACR_S9_2	chr5	107904670	107904670	G	T	intronic	Rpl5	NA	NA	NA	intronic	Rpl5	NA	NA	NA	intronic	ENSMUSG00000058558	NA	NA	NA	5qF	NA	NA	+	ATTCCTGGGAGTGTTGTAATT	chr5	107904670	GGAxTGT	G	T	75_S12_L001_R1_001	64_Jiri_S1_L001_R1_001	0	NOVEL	COVERED	0.999862	0.999862	1	1	1	170	0	-9.60797	8.20215	5.95781	6.54764	0.065934	0.02	0.702276
ACR_S9_2	chr5	135078097	135078097	G	C	exonic	Vps37d	NA	nonsynonymous SNV	Vps37d:NM_001199677:exon1:c.C103G:p.P35A,Vps37d:NM_177574:exon1:c.C103G:p.P35A	exonic	Vps37d	NA	nonsynonymous SNV	Vps37d:uc008zxq.2:exon1:c.C103G:p.P35A,Vps37d:uc008zxr.2:exon1:c.C103G:p.P35A	exonic	ENSMUSG00000043614	NA	nonsynonymous SNV	ENSMUSG00000043614:ENSMUST00000067935:exon1:c.C103G:p.P35A,ENSMUSG00000043614:ENSMUST00000076203:exon1:c.C103G:p.P35A	5qG2	NA	NA	-	TCCAGCTTGGGCTCATCTTGA	chr5	135078097	TGGxCTC	G	C	75_S12_L001_R1_001	64_Jiri_S1_L001_R1_001	0	NOVEL	COVERED	0.739671	0.739671	1	1	1	81	0	3.30425	7.20239	3.60264	5.33125	0.133333	0.02	-0.280106
ACR_S9_2	chr5	136987641	136987641	C	G	UTR5	Plod3,Znhit1	NM_011962:c.-45C>G;NM_027318:c.-134G>C	NA	NA	UTR5	Plod3,Znhit1	uc009abj.2:c.-45C>G,uc009abk.2:c.-45C>G;uc009abi.1:c.-134G>C	NA	NA	UTR5	ENSMUSG00000004846,ENSMUSG00000059518	ENSMUST00000004968:c.-45C>G;ENSMUST00000156963:c.-134G>C	NA	NA	5qG2	NA	NA	NA	GCGCTCAGCTCAGCGCCGGTG	chr5	136987641	GCTxAGC	C	G	75_S12_L001_R1_001	64_Jiri_S1_L001_R1_001	0	NOVEL	COVERED	0.954491	0.954491	1	1	1	112	0	1.16588	8.63322	6.17331	2.74118	0.104167	0.02	-0.429202
ACR_S9_2	chr5	137797841	137797841	G	T	intronic	Zcwpw1	NA	NA	NA	intronic	Zcwpw1	NA	NA	NA	intronic	ENSMUSG00000037108	NA	NA	NA	5qG2	NA	NA	+	TGACTTGTCAGAAGTGAGAAA	chr5	137797841	TCAxAAG	G	T	75_S12_L001_R1_001	64_Jiri_S1_L001_R1_001	0	NOVEL	COVERED	0.999726	0.999726	1	1	1	209	0	-7.2904	9.40344	7.81947	6.86414	0.068966	0.02	0.737542
ACR_S9_2	chr5	144024470	144024470	A	C	exonic	Ocm	NA	nonsynonymous SNV	Ocm:NM_033039:exon3:c.T152G:p.I51R	exonic	Ocm	NA	nonsynonymous SNV	Ocm:uc029vqf.1:exon3:c.T152G:p.I51R	exonic	ENSMUSG00000029618	NA	nonsynonymous SNV	ENSMUSG00000029618:ENSMUST00000085704:exon2:c.T152G:p.I51R,ENSMUSG00000029618:ENSMUST00000031622:exon3:c.T152G:p.I51R,ENSMUSG00000029618:ENSMUST00000110702:exon3:c.T152G:p.I51R	5qG2	NA	NA	-	GTCGTTGTCTATGAACTGGAA	chr5	144024470	TCTxTGA	A	C	75_S12_L001_R1_001	64_Jiri_S1_L001_R1_001	0	NOVEL	COVERED	0.97082	0.97082	1	1	0.999994	97	0	69.94	70.0906	31.3033	38.4289	0.56	0.02	1.13333
ACR_S9_2	chr6	83107493	83107493	G	T	exonic	Ccdc142	NA	nonsynonymous SNV	Ccdc142:NM_001081266:exon7:c.G1591T:p.V531F	exonic	Ccdc142	NA	nonsynonymous SNV	Ccdc142:uc009cmj.1:exon7:c.G1591T:p.V531F	exonic	ENSMUSG00000079511	NA	nonsynonymous SNV	ENSMUSG00000079511:ENSMUST00000101253:exon7:c.G1591T:p.V531F,ENSMUSG00000079511:ENSMUST00000101254:exon7:c.G1591T:p.V531F	6qC3	NA	NA	+	TCGGATAGTGGTCTACTCTGT	chr6	83107493	GTGxTCT	G	T	75_S12_L001_R1_001	64_Jiri_S1_L001_R1_001	0	NOVEL	UNCOVERED	0.13983	0.139832	0.999988	0.999988	0.996292	39	0	5.62056	6.30198	0	6.43323	0.25	0.02	-0.105188
ACR_S9_2	chr6	120766411	120766411	G	T	splicing	Cecr2	NM_001128151:exon19:c.4273-1G>T	NA	NA	splicing	Cecr2	uc009dno.2:exon19:c.4273-1G>T	NA	NA	splicing	ENSMUSG00000071226	ENSMUST00000112686:exon19:c.4273-1G>T,ENSMUST00000100993:exon19:c.4357-1G>T	NA	NA	6qF1	NA	NA	+	TGTACTTTCAGAGCTAGTCCA	chr6	120766411	TCAxAGC	G	T	75_S12_L001_R1_001	E210_S1	0	NOVEL	COVERED	0.423472	0.423478	0.999988	0.999988	0.996292	48	0	5.59489	6.57436	6.37429	6.35251	0.285714	0.02	-0.181984
ACR_S9_2	chr6	142268274	142268274	C	T	exonic	Slco1a5	NA	nonsynonymous SNV	Slco1a5:NM_001267707:exon3:c.G120A:p.M40I,Slco1a5:NM_130861:exon3:c.G120A:p.M40I	exonic	Slco1a5	NA	nonsynonymous SNV	Slco1a5:uc009epa.2:exon3:c.G120A:p.M40I,Slco1a5:uc029wcj.2:exon3:c.G120A:p.M40I,Slco1a5:uc029wck.2:exon3:c.G120A:p.M40I	exonic	ENSMUSG00000063975	NA	nonsynonymous SNV	ENSMUSG00000063975:ENSMUST00000153268:exon2:c.G120A:p.M40I,ENSMUSG00000063975:ENSMUST00000081380:exon3:c.G120A:p.M40I,ENSMUSG00000063975:ENSMUST00000111825:exon3:c.G120A:p.M40I	6qG2	NA	NA	-	GCATGGAATTCATATAAATTC	chr6	142268274	ATTxATA	C	T	75_S12_L001_R1_001	64_Jiri_S1_L001_R1_001	0	NOVEL	COVERED	1	1	1	1	1	285	0	-20.8172	9.21971	3.61863	6.49048	0.05	0.02	1.57183
ACR_S9_2	chr7	16749116	16749116	G	C	UTR3	Ap2s1	NM_198613:c.*103G>C	NA	NA	UTR3	Ap2s1	uc012faj.1:c.*103G>C	NA	NA	UTR3	ENSMUSG00000008036	ENSMUST00000086112:c.*103G>C	NA	NA	7qA2	NA	NA	+	TCCTCAGCTGGCCCAGAGGAA	chr7	16749116	CTGxCCC	G	C	75_S12_L001_R1_001	64_Jiri_S1_L001_R1_001	0	NOVEL	UNCOVERED	0.019843	0.019982	0.993072	0.993072	0	15	0	8.4365	8.6532	5.42388	6.45269	0.75	0.02	-0.035073
ACR_S9_2	chr7	25228810	25228810	T	G	ncRNA_exonic	9130221H12Rik	NA	NA	NA	ncRNA_exonic	9130221H12Rik	NA	NA	NA	UTR3	ENSMUSG00000057177	ENSMUST00000071739:c.*44A>C,ENSMUST00000108411:c.*44A>C	NA	NA	7qA3	NA	NA	+	CCAGCGCCACTTGGGCCTTCC	chr7	25228810	CACxTGG	T	G	75_S12_L001_R1_001	70_S7_L001_R1_001	0	NOVEL	COVERED	1	1	1	1	1	1092	8	-54.5817	25.6671	0	25.9719	0.052632	0.02	5.9815
ACR_S9_2	chr7	44105592	44105592	A	T	exonic	Klk1b21	NA	nonsynonymous SNV	Klk1b21:NM_010642:exon3:c.A310T:p.S104C	exonic	Klk1b21	NA	nonsynonymous SNV	Klk1b21:uc009goh.1:exon3:c.A310T:p.S104C	exonic	ENSMUSG00000066516	NA	nonsynonymous SNV	ENSMUSG00000066516:ENSMUST00000085455:exon3:c.A310T:p.S104C	7qB3	NA	NA	+	CTACAACATGAGCCTCATGAA	chr7	44105592	ATGxGCC	A	T	75_S12_L001_R1_001	64_Jiri_S1_L001_R1_001	0	NOVEL	COVERED	0.994422	0.994422	1	1	1	176	0	38.4027	41.0645	26.7737	30.4505	0.287879	0.02	0.921477
ACR_S9_2	chr7	45712122	45712122	G	C	exonic	Sphk2	NA	nonsynonymous SNV	Sphk2:NM_001172561:exon5:c.C703G:p.P235A,Sphk2:NM_020011:exon5:c.C703G:p.P235A,Sphk2:NM_203280:exon6:c.C703G:p.P235A	exonic	Sphk2	NA	nonsynonymous SNV	Sphk2:uc009gwt.2:exon5:c.C703G:p.P235A,Sphk2:uc009gwv.2:exon5:c.C703G:p.P235A,Sphk2:uc009gwu.2:exon6:c.C703G:p.P235A	exonic	ENSMUSG00000057342	NA	nonsynonymous SNV	ENSMUSG00000057342:ENSMUST00000072836:exon5:c.C703G:p.P235A,ENSMUSG00000057342:ENSMUST00000107738:exon5:c.C703G:p.P235A,ENSMUSG00000057342:ENSMUST00000107737:exon6:c.C703G:p.P235A	7qB3	NA	NA	-	ACACCAATGGGCATCCGCACG	chr7	45712122	TGGxCAT	G	C	75_S12_L001_R1_001	64_Jiri_S1_L001_R1_001	0	NOVEL	COVERED	0.229173	0.229173	0.999997	0.999997	0.999667	46	0	11.1856	11.5469	9.83467	7.95752	0.333333	0.02	-0.13119
ACR_S9_2	chr7	50219694	50219694	A	C	intronic	Nell1	NA	NA	NA	intronic	Nell1	NA	NA	NA	intronic	ENSMUSG00000055409	NA	NA	NA	7qB4	NA	NA	+	ATAGTATGTGACTTGTTCCTA	chr7	50219694	GTGxCTT	A	C	75_S12_L001_R1_001	64_Jiri_S1_L001_R1_001	0	NOVEL	UNCOVERED	0.099257	0.099721	0.995343	0.995343	0	24	0	6.43182	6.78323	2.10373	7.35541	0.3	0.02	-0.08746
ACR_S9_2	chr7	98121658	98121658	T	C	UTR3	Capn5	NM_001301250:c.*2215A>G,NM_007602:c.*2215A>G	NA	NA	UTR3	Capn5	uc009ikc.1:c.*2215A>G,uc009ikd.1:c.*2215A>G	NA	NA	UTR3	ENSMUSG00000035547	ENSMUST00000040971:c.*2215A>G	NA	NA	7qE1	NA	NA	-	GGCCAGGCCCTGTTGGTTCAC	chr7	98121658	CCCxGTT	T	C	75_S12_L001_R1_001	64_Jiri_S1_L001_R1_001	0	NOVEL	COVERED	0.582923	0.58293	0.999988	0.999988	0.996292	53	0	36.28	36.8653	22.7234	21.1993	0.666667	0.02	-0.227585
ACR_S9_2	chr7	102060038	102060038	G	C	intronic	Rnf121	NA	NA	NA	intronic	Rnf121	NA	NA	NA	UTR5	ENSMUSG00000070426	ENSMUST00000106953:c.-934C>G	NA	NA	7qE2	NA	NA	-	CTTGCTTTGAGAAAGCAAGAG	chr7	102060038	TGAxAAA	G	C	75_S12_L001_R1_001	E210_S1	0	NOVEL	COVERED	0.97082	0.97082	1	1	1	164	0	0.446833	8.43876	7.17943	1.21305	0.1	0.02	1.03587
ACR_S9_2	chr7	105694217	105694217	A	G	intergenic	Timm10b,Rrp8	dist=52372;dist=37513	NA	NA	downstream	mFLJ00251	NA	NA	NA	exonic	ENSMUSG00000030882	NA	synonymous SNV	ENSMUSG00000030882:ENSMUST00000145988:exon22:c.A4767G:p.Q1589Q	7qE3	NA	NA	NA	ATATAGCCCAACTCCTGGAGA	chr7	105694217	CCAxCTC	A	G	75_S12_L001_R1_001	64_Jiri_S1_L001_R1_001	0	NOVEL	COVERED	0.612407	0.612407	1	1	0.999912	64	0	7.57292	10.0733	8.46983	8.20575	0.185185	0.02	-0.236487
ACR_S9_2	chr7	108941633	108941633	G	C	UTR3	Eif3f	NM_025344:c.*95G>C	NA	NA	UTR3	Eif3f	uc009jdc.2:c.*95G>C	NA	NA	UTR3	ENSMUSG00000031029	ENSMUST00000033342:c.*95G>C	NA	NA	7qE3	NA	NA	+	CTTGAGTCACGGTGACTCAGT	chr7	108941633	CACxGTG	G	C	75_S12_L001_R1_001	64_Jiri_S1_L001_R1_001	0	NOVEL	COVERED	0.760885	0.760887	0.999997	0.999997	0.998875	61	0	3.4756	7.31005	4.55424	6.22053	0.151515	0.02	-0.288718
ACR_S9_2	chr7	109170022	109170022	G	T	UTR5	Lmo1	NM_057173:c.-15C>A	NA	NA	UTR5	Lmo1	uc009jdk.1:c.-15C>A	NA	NA	UTR5	ENSMUSG00000036111	ENSMUST00000036992:c.-15C>A	NA	NA	7qE3	NA	NA	-	GGCGCTCCGTGTCCAGCCGCT	chr7	109170022	CGTxTCC	G	T	75_S12_L001_R1_001	64_Jiri_S1_L001_R1_001	0	NOVEL	UNCOVERED	0.161282	0.162467	0.992708	0.992708	0	23	0	5.82113	6.33303	3.72919	6.33328	0.272727	0.02	-0.113953
ACR_S9_2	chr7	109974777	109974777	T	G	UTR3	Tmem41b	NM_153525:c.*5A>C	NA	NA	UTR3	Tmem41b	uc009jen.1:c.*5A>C,uc009jeo.1:c.*5A>C,uc009jep.1:c.*5A>C	NA	NA	UTR3	ENSMUSG00000047554	ENSMUST00000094097:c.*5A>C,ENSMUST00000119929:c.*5A>C,ENSMUST00000118429:c.*5A>C	NA	NA	7qE3	NA	NA	-	AAAAGCCATGTCTTTTCACTC	chr7	109974777	ATGxCTT	T	G	75_S12_L001_R1_001	E210_S1	0	NOVEL	COVERED	0.760887	0.760887	1	1	1	109	15	2.28291	6.92355	3.99094	5.00088	0.121212	0.02	-0.289271
ACR_S9_2	chr7	110461158	110461158	C	G	exonic	Sbf2	NA	nonsynonymous SNV	Sbf2:NM_177324:exon6:c.G598C:p.A200P	exonic	Sbf2	NA	nonsynonymous SNV	Sbf2:uc009jfe.2:exon6:c.G598C:p.A200P,Sbf2:uc009jfg.2:exon6:c.G598C:p.A200P,Sbf2:uc009jfh.2:exon6:c.G595C:p.A199P,Sbf2:uc009jfi.2:exon6:c.G598C:p.A200P,Sbf2:uc009jff.2:exon7:c.G457C:p.A153P	exonic	ENSMUSG00000038371	NA	nonsynonymous SNV	ENSMUSG00000038371:ENSMUST00000166020:exon5:c.G460C:p.A154P,ENSMUSG00000038371:ENSMUST00000033058:exon6:c.G598C:p.A200P,ENSMUSG00000038371:ENSMUST00000164759:exon6:c.G598C:p.A200P,ENSMUSG00000038371:ENSMUST00000171218:exon6:c.G598C:p.A200P	7qE3	NA	NA	-	AATAAAAGAGCCACACTAGTG	chr7	110461158	GAGxCAC	C	G	75_S12_L001_R1_001	64_Jiri_S1_L001_R1_001	0	NOVEL	COVERED	1	1	1	1	1	747	0	-47.4131	14.7028	6.62929	11.7661	0.040293	0.02	5.37443
ACR_S9_2	chr7	119710648	119710648	T	G	exonic	Acsm4	NA	nonsynonymous SNV	Acsm4:NM_178414:exon10:c.T1268G:p.L423R	exonic	Acsm4	NA	nonsynonymous SNV	Acsm4:uc009jln.2:exon10:c.T1268G:p.L423R	exonic	ENSMUSG00000047026	NA	nonsynonymous SNV	ENSMUSG00000047026:ENSMUST00000047045:exon10:c.T1268G:p.L423R	7qF2	NA	NA	+	GCCCTTAGGCTGAAGTCCGAT	chr7	119710648	GGCxGAA	T	G	75_S12_L001_R1_001	64_Jiri_S1_L001_R1_001	0	NOVEL	COVERED	1	1	1	1	1	631	0	-45.7428	12.0519	7.80992	10.6991	0.042802	0.02	5.14214
ACR_S9_2	chr7	138394307	138394307	A	C	intronic	Tcerg1l	NA	NA	NA	intronic	Tcerg1l	NA	NA	NA	intronic	ENSMUSG00000091002	NA	NA	NA	7qF4	NA	NA	-	TCTGTCCAAAACAAAGGCAAG	chr7	138394307	AAAxCAA	A	C	75_S12_L001_R1_001	64_Jiri_S1_L001_R1_001	0	NOVEL	COVERED	0.851984	0.851984	1	1	1	113	0	9.61298	12.9558	3.53483	14.0327	0.189189	0.02	-0.33291
ACR_S9_2	chr7	141213643	141213643	G	T	exonic	Lmntd2	NA	nonsynonymous SNV	Lmntd2:NM_028050:exon2:c.C329A:p.P110H	exonic	1600016N20Rik	NA	nonsynonymous SNV	1600016N20Rik:uc009kjz.1:exon2:c.C329A:p.P110H,1600016N20Rik:uc012fwr.1:exon2:c.C329A:p.P110H	exonic	ENSMUSG00000025500	NA	nonsynonymous SNV	ENSMUSG00000025500:ENSMUST00000026573:exon2:c.C329A:p.P110H,ENSMUSG00000025500:ENSMUST00000170841:exon2:c.C329A:p.P110H	7qF5	NA	NA	-	CCGCTCAGAGGGAACCCCTGC	chr7	141213643	GAGxGAA	G	T	75_S12_L001_R1_001	64_Jiri_S1_L001_R1_001	0	NOVEL	COVERED	0.353946	0.353947	0.999998	0.999998	0.999763	53	0	14.1425	14.4214	12.2311	3.99466	0.368421	0.02	-0.165316
ACR_S9_2	chr7	144451984	144451984	A	T	intronic	Cttn	NA	NA	NA	intronic	Cttn	NA	NA	NA	intronic	ENSMUSG00000031078	NA	NA	NA	7qF5	NA	NA	-	CGAGCGTCCCAGAGGGCCCTG	chr7	144451984	CCCxGAG	A	T	75_S12_L001_R1_001	64_Jiri_S1_L001_R1_001	0	NOVEL	COVERED	0.322806	0.322807	0.999998	0.999998	0.999763	52	0	6.70337	7.97325	8.08595	0	0.222222	0.02	-0.157552
ACR_S9_2	chr8	13414478	13414478	G	C	exonic	Grk1	NA	nonsynonymous SNV	Grk1:NM_011881:exon6:c.G1349C:p.R450P	exonic	Grk1	NA	nonsynonymous SNV	Grk1:uc009kxw.2:exon6:c.G1349C:p.R450P	exonic	ENSMUSG00000031450	NA	nonsynonymous SNV	ENSMUSG00000031450:ENSMUST00000033827:exon6:c.G1349C:p.R450P	8qA1.1	NA	NA	+	GATGCGCTTCGGGCAAACGTC	chr8	13414478	TTCxGGC	G	C	75_S12_L001_R1_001	64_Jiri_S1_L001_R1_001	0	NOVEL	UNCOVERED	0.0768	0.077336	0.993072	0.993072	0	20	0	11.9735	11.9978	10.5526	3.58977	0.555556	0.02	-0.07884
ACR_S9_2	chr8	25597194	25597194	T	G	UTR5	Letm2	NM_173012:c.-786A>C	NA	NA	UTR5	Letm2	uc009lgf.2:c.-786A>C,uc009lgi.1:c.-786A>C,uc009lgj.2:c.-786A>C	NA	NA	ncRNA_exonic	ENSMUSG00000043794	NA	NA	NA	8qA2	NA	NA	-	TCCCCAGCCCTTGGCCCCGGG	chr8	25597194	CCCxTGG	T	G	75_S12_L001_R1_001	64_Jiri_S1_L001_R1_001	0	NOVEL	COVERED	0.693668	0.693668	1	1	1	105	0	3.0023	6.66686	2.54761	7.46689	0.137931	0.02	-0.262598
ACR_S9_2	chr8	28719909	28719909	C	T	exonic	Unc5d	NA	synonymous SNV	Unc5d:NM_153135:exon11:c.G1398A:p.P466P	exonic	Unc5d	NA	synonymous SNV	Unc5d:uc009lja.2:exon8:c.G1182A:p.P394P,Unc5d:uc012gbv.1:exon9:c.G1176A:p.P392P,Unc5d:uc012gbw.1:exon9:c.G1215A:p.P405P,Unc5d:uc012gbu.1:exon10:c.G1344A:p.P448P,Unc5d:uc009liz.2:exon11:c.G1398A:p.P466P	exonic	ENSMUSG00000063626	NA	synonymous SNV	ENSMUSG00000063626:ENSMUST00000168630:exon11:c.G1398A:p.P466P	8qA2	NA	NA	-	CCTTGTCGAGCGGATCCTGCA	chr8	28719909	GAGxGGA	C	T	75_S12_L001_R1_001	64_Jiri_S1_L001_R1_001	0	NOVEL	UNCOVERED	0.13983	0.139832	0.999988	0.999988	0.996292	39	0	14.1493	14.1493	0	14.8397	0.5	0.02	-0.105084
ACR_S9_2	chr8	48276075	48276075	A	G	exonic	Tenm3	NA	nonsynonymous SNV	Tenm3:NM_001145937:exon21:c.T4847C:p.L1616P,Tenm3:NM_011857:exon23:c.T4895C:p.L1632P	exonic	Tenm3	NA	nonsynonymous SNV	Tenm3:uc009lrt.1:exon9:c.T2144C:p.L715P,Tenm3:uc009lrr.2:exon21:c.T4847C:p.L1616P,Tenm3:uc009lrs.2:exon23:c.T4895C:p.L1632P	exonic	ENSMUSG00000031561	NA	nonsynonymous SNV	ENSMUSG00000031561:ENSMUST00000033965:exon23:c.T4895C:p.L1632P	8qB1.1	NA	NA	-	GGTGGCTAAAAGCCCACTGTT	chr8	48276075	AAAxGCC	A	G	75_S12_L001_R1_001	64_Jiri_S1_L001_R1_001	0	NOVEL	COVERED	1	1	1	1	1	726	0	70.8025	98.8583	51.2411	83.5984	0.17931	0.02	5.42018
ACR_S9_2	chr8	77663978	77663978	T	C	UTR3	Ednra	NM_010332:c.*998A>G	NA	NA	ncRNA_intronic	AK017010,AK135599	NA	NA	NA	ncRNA_intronic	ENSMUSG00000086451	NA	NA	NA	8qC1	NA	NA	-	GCTGTGGAAATCATGGTTTCC	chr8	77663978	AAAxCAT	T	C	75_S12_L001_R1_001	E210_S1	0	NOVEL	COVERED	1	1	1	1	1	256	0	-14.7858	12.8463	7.95888	4.49967	0.06993	0.02	1.74801
ACR_S9_2	chr8	77663983	77663983	G	A	UTR3	Ednra	NM_010332:c.*993C>T	NA	NA	ncRNA_intronic	AK017010,AK135599	NA	NA	NA	ncRNA_intronic	ENSMUSG00000086451	NA	NA	NA	8qC1	NA	NA	-	GGAAATCATGGTTTCCAAACA	chr8	77663983	ATGxTTT	G	A	75_S12_L001_R1_001	E210_S1	0	NOVEL	COVERED	1	1	1	1	1	258	0	-14.7224	12.6857	8.32427	3.99391	0.06993	0.02	1.45826
ACR_S9_2	chr8	86538311	86538311	C	T	intronic	Abcc12	NA	NA	NA	intronic	Abcc12	NA	NA	NA	intronic	ENSMUSG00000036872	NA	NA	NA	8qC3	NA	NA	-	GGACCACGCACATCCCAGTCA	chr8	86538311	GCAxATC	C	T	75_S12_L001_R1_001	64_Jiri_S1_L001_R1_001	0	NOVEL	COVERED	0.835716	0.835716	1	1	0.999992	77	0	16.7596	18.9828	13.3583	14.1554	0.243243	0.02	-0.32437
ACR_S9_2	chr8	92919034	92919034	T	C	UTR3	Lpcat2	NM_173014:c.*815T>C	NA	NA	UTR3	Lpcat2	uc009mug.1:c.*815T>C,uc012gii.1:c.*815T>C,uc012gij.1:c.*815T>C	NA	NA	UTR3	ENSMUSG00000033192	ENSMUST00000046290:c.*815T>C	NA	NA	8qC5	NA	NA	+	CTCACAAACTTTAGAGTTTGT	chr8	92919034	ACTxTAG	T	C	75_S12_L001_R1_001	64_Jiri_S1_L001_R1_001	0	NOVEL	COVERED	0.851984	0.851984	1	1	0.999999	86	0	4.45688	9.22945	0	10.4674	0.135135	0.02	-0.333108
ACR_S9_2	chr8	110826182	110826182	C	G	exonic	Sf3b3	NA	nonsynonymous SNV	Sf3b3:NM_133953:exon12:c.G1467C:p.E489D	exonic	Sf3b3	NA	nonsynonymous SNV	Sf3b3:uc009nlb.1:exon12:c.G1467C:p.E489D,Sf3b3:uc009nlc.1:exon12:c.G1467C:p.E489D	exonic	ENSMUSG00000033732	NA	nonsynonymous SNV	ENSMUSG00000033732:ENSMUST00000042012:exon12:c.G1467C:p.E489D	8qE1	NA	NA	-	CTTCCACAGTCTCTCCGATAG	chr8	110826182	AGTxTCT	C	G	75_S12_L001_R1_001	64_Jiri_S1_L001_R1_001	0	NOVEL	COVERED	0.717315	0.717315	1	1	0.999998	78	0	17.7811	18.9923	13.517	6.97653	0.290323	0.02	-0.271334
ACR_S9_2	chr8	122568120	122568120	C	G	exonic	Cdt1	NA	nonsynonymous SNV	Cdt1:NM_026014:exon1:c.C65G:p.A22G	exonic	Cdt1	NA	nonsynonymous SNV	Cdt1:uc009ntd.1:exon1:c.C65G:p.A22G	exonic	ENSMUSG00000006585	NA	nonsynonymous SNV	ENSMUSG00000006585:ENSMUST00000006760:exon1:c.C65G:p.A22G	8qE1	NA	NA	+	ACTCCGCGGGCCAAGTCGATC	chr8	122568120	GGGxCAA	C	G	75_S12_L001_R1_001	64_Jiri_S1_L001_R1_001	0	NOVEL	UNCOVERED	0.02392	0.024074	0.993634	0.993634	0	17	0	11.022	11.4194	3.27643	11.219	0.8	0.02	-0.043837
ACR_S9_2	chr8	123485978	123485978	A	G	exonic	Afg3l1	NA	synonymous SNV	Afg3l1:NM_054070:exon5:c.A477G:p.R159R	exonic	Afg3l1	NA	synonymous SNV	Afg3l1:uc009nwd.2:exon5:c.A477G:p.R159R	exonic	ENSMUSG00000031967	NA	synonymous SNV	ENSMUSG00000031967:ENSMUST00000001520:exon5:c.A477G:p.R159R,ENSMUSG00000031967:ENSMUST00000098320:exon5:c.A477G:p.R159R	8qE1	NA	NA	+	TTTATTTCCGAGATCCCGGAA	chr8	123485978	CCGxGAT	A	G	75_S12_L001_R1_001	E210_S1	0	NOVEL	COVERED	1	1	1	1	1	927	0	-79.1111	14.3645	3.28178	11.5233	0.0375	0.02	7.71383
ACR_S9_2	chr9	44047882	44047882	T	G	UTR3	Thy1	NM_009382:c.*431T>G	NA	NA	UTR3	Thy1	uc009pbl.1:c.*431T>G	NA	NA	UTR3	ENSMUSG00000032011	ENSMUST00000114840:c.*431T>G	NA	NA	9qA5.1	NA	NA	+	CCTGGTACAGTCATACTCTGT	chr9	44047882	CAGxCAT	T	G	75_S12_L001_R1_001	E210_S1	0	NOVEL	COVERED	0.99994	0.99994	1	1	1	213	0	-8.05829	9.41448	10.1656	0	0.066667	0.02	0.65118
ACR_S9_2	chr9	47851697	47851697	T	A	UTR3	Cadm1	NM_018770:c.*1307T>A,NM_207675:c.*1307T>A,NM_207676:c.*1307T>A,NM_001025600:c.*1307T>A	NA	NA	UTR3	Cadm1	uc009php.1:c.*1307T>A,uc009phq.1:c.*1307T>A,uc009phr.1:c.*1307T>A,uc009phs.1:c.*1307T>A,uc012gso.2:c.*1307T>A,uc012gsm.1:c.*1307T>A	NA	NA	UTR3	ENSMUSG00000032076	ENSMUST00000114548:c.*1307T>A,ENSMUST00000114547:c.*1307T>A	NA	NA	9qA5.3	NA	NA	+	CCTGCTGGGATTCCCAGCTCC	chr9	47851697	GGAxTCC	T	A	75_S12_L001_R1_001	E210_S1	0	NOVEL	COVERED	0.668463	0.668523	0.999909	0.999909	0.989678	53	0	3.19754	6.86526	3.0521	3.88493	0.137931	0.02	-0.253942
ACR_S9_2	chr9	69384145	69384145	A	G	UTR3	Rora	NM_013646:c.*5184A>G,NM_001289916:c.*5184A>G	NA	NA	UTR3	Rora	uc009qmx.2:c.*5184A>G,uc009qmz.3:c.*5184A>G,uc009qna.2:c.*5184A>G,uc012gwh.2:c.*5184A>G	NA	NA	UTR3	ENSMUSG00000032238	ENSMUST00000034766:c.*5184A>G	NA	NA	9qC	NA	NA	+	TTCCTGGAAGAGTTGCCCTTG	chr9	69384145	AAGxGTT	A	G	75_S12_L001_R1_001	64_Jiri_S1_L001_R1_001	0	NOVEL	COVERED	1	1	1	1	1	429	0	25.5129	46.9138	13.0191	39.4461	0.146067	0.02	3.21567
ACR_S9_2	chr9	101964022	101964022	G	T	exonic	Ephb1	NA	synonymous SNV	Ephb1:NM_001168296:exon11:c.C2133A:p.V711V,Ephb1:NM_173447:exon12:c.C2256A:p.V752V	exonic	Ephb1	NA	synonymous SNV	Ephb1:uc012gzg.1:exon11:c.C2133A:p.V711V,Ephb1:uc009rfn.2:exon12:c.C2256A:p.V752V	exonic	ENSMUSG00000032537	NA	synonymous SNV	ENSMUSG00000032537:ENSMUST00000085169:exon11:c.C2133A:p.V711V,ENSMUSG00000032537:ENSMUST00000035129:exon12:c.C2256A:p.V752V	9qF1	NA	NA	-	GGTTGCTGTTGACCAGAATGT	chr9	101964022	GTTxACC	G	T	75_S12_L001_R1_001	64_Jiri_S1_L001_R1_001	0	NOVEL	COVERED	0.322764	0.322807	0.999869	0.999869	0.984784	39	0	5.27125	6.5792	5.88262	2.49169	0.222222	0.02	-0.157303
ACR_S9_2	chr9	106481338	106481338	A	C	exonic	Rrp9	NA	nonsynonymous SNV	Rrp9:NM_145620:exon5:c.A374C:p.K125T	exonic	Rrp9	NA	nonsynonymous SNV	Rrp9:uc009rkb.1:exon5:c.A374C:p.K125T	exonic	ENSMUSG00000041506	NA	nonsynonymous SNV	ENSMUSG00000041506:ENSMUST00000047721:exon5:c.A374C:p.K125T	9qF1	NA	NA	+	AGGTTGCAGAAGTCGGTGGCC	chr9	106481338	AGAxGTC	A	C	75_S12_L001_R1_001	64_Jiri_S1_L001_R1_001	0	NOVEL	UNCOVERED	0.023894	0.024074	0.99254	0.99254	0	14	0	10.4263	10.8182	11.9028	0	0.8	0.02	-0.043824
ACR_S9_2	chr9	122379628	122379628	G	C	UTR3	Abhd5	NM_026179:c.*26G>C	NA	NA	UTR3	Abhd5	uc009sew.1:c.*26G>C,uc009sex.1:c.*26G>C,uc009sey.1:c.*26G>C	NA	NA	UTR3	ENSMUSG00000032540	ENSMUST00000156520:c.*26G>C,ENSMUST00000035128:c.*1015G>C,ENSMUST00000111497:c.*26G>C	NA	NA	9qF4	NA	NA	+	CAGCACCCGTGACGGGTGCCG	chr9	122379628	CGTxACG	G	C	75_S12_L001_R1_001	E210_S1	0	NOVEL	COVERED	0.353897	0.353947	0.999859	0.999859	0	37	0	7.00546	8.46773	6.19623	4.94932	0.210526	0.02	-0.166291
ACR_S9_2	chr10	3873263	3873263	A	C	exonic	Plekhg1	NA	nonsynonymous SNV	Plekhg1:NM_001033253:exon2:c.A230C:p.N77T,Plekhg1:NM_001159942:exon3:c.A230C:p.N77T	exonic	Plekhg1	NA	nonsynonymous SNV	Plekhg1:uc007ehl.2:exon2:c.A230C:p.N77T,Plekhg1:uc007ehm.2:exon3:c.A230C:p.N77T,Plekhg1:uc007ehn.1:exon3:c.A230C:p.N77T,Plekhg1:uc007eho.1:exon3:c.A230C:p.N77T	exonic	ENSMUSG00000040624	NA	nonsynonymous SNV	ENSMUSG00000040624:ENSMUST00000042438:exon2:c.A230C:p.N77T,ENSMUSG00000040624:ENSMUST00000120274:exon3:c.A230C:p.N77T	10qA1	NA	NA	+	GGACCACAAAACATGAATGGG	chr10	3873263	AAAxCAT	A	C	75_S12_L001_R1_001	64_Jiri_S1_L001_R1_001	0	NOVEL	COVERED	0.760887	0.760887	1	1	1	82	0	2.28213	6.92344	1.41752	5.05057	0.121212	0.02	-0.289287
ACR_S9_2	chr10	31694365	31694365	T	G	exonic	Nkain2	NA	nonsynonymous SNV	Nkain2:NM_001013411:exon6:c.A584C:p.K195T	exonic	Nkain2	NA	nonsynonymous SNV	Nkain2:uc007etx.1:exon5:c.A260C:p.K87T,Nkain2:uc007etw.2:exon6:c.A584C:p.K195T	intergenic	ENSMUSG00000098038,ENSMUSG00000069671	dist=53905;dist=635400	NA	NA	10qA4	NA	NA	-	GTGAGATGTCTTCTGAGGCCC	chr10	31694365	GTCxTCT	T	G	75_S12_L001_R1_001	64_Jiri_S1_L001_R1_001	0	NOVEL	COVERED	0.999998	0.999998	1	1	1	275	0	95.1715	95.7942	52.473	57.2019	0.422414	0.02	1.7732
ACR_S9_2	chr10	76470534	76470534	A	G	exonic	Mcm3ap	NA	synonymous SNV	Mcm3ap:NM_019434:exon2:c.A480G:p.P160P	exonic	Mcm3ap	NA	synonymous SNV	Mcm3ap:uc007fup.1:exon2:c.A480G:p.P160P	exonic	ENSMUSG00000001150	NA	synonymous SNV	ENSMUSG00000001150:ENSMUST00000170795:exon2:c.A480G:p.P160P	10qC1	NA	NA	+	AGTCAGAGCCAGAAAAAACCC	chr10	76470534	GCCxGAA	A	G	75_S12_L001_R1_001	64_Jiri_S1_L001_R1_001	0	NOVEL	COVERED	1	1	1	1	1	414	0	67.0913	77.6808	24.4265	63.7954	0.239766	0.02	3.00153
ACR_S9_2	chr10	77053255	77053255	C	A	exonic	Col18a1	NA	nonsynonymous SNV	Col18a1:NM_001109991:exon41:c.G4523T:p.C1508F,Col18a1:NM_009929:exon42:c.G3887T:p.C1296F	exonic	Col18a1	NA	nonsynonymous SNV	Col18a1:uc007fvg.1:exon41:c.G4523T:p.C1508F,Col18a1:uc007fvh.2:exon42:c.G3887T:p.C1296F	exonic	ENSMUSG00000001435	NA	nonsynonymous SNV	ENSMUSG00000001435:ENSMUST00000072755:exon41:c.G5264T:p.C1755F,ENSMUSG00000001435:ENSMUST00000105409:exon41:c.G4523T:p.C1508F,ENSMUSG00000001435:ENSMUST00000081654:exon42:c.G3887T:p.C1296F	10qC1	NA	NA	-	GCTGTTGTGGCAGCTCGCAGC	chr10	77053255	TGGxAGC	C	A	75_S12_L001_R1_001	64_Jiri_S1_L001_R1_001	0	NOVEL	COVERED	0.954491	0.954491	1	1	1	133	0	1.57546	8.5322	3.54013	4.83625	0.108696	0.02	-0.428032
ACR_S9_2	chr10	79977264	79977264	G	C	ncRNA_intronic	Bc1	NA	NA	NA	ncRNA_intronic	Bc1	NA	NA	NA	UTR3	ENSMUSG00000013858	ENSMUST00000052885:c.*155C>G	NA	NA	10qC1	NA	NA	-	CGTGTGGAAGGCACTGGGGAG	chr10	79977264	AAGxCAC	G	C	75_S12_L001_R1_001	64_Jiri_S1_L001_R1_001	0	NOVEL	COVERED	0.668521	0.668523	0.999997	0.999997	0.999646	59	0	3.78522	7.46152	3.49986	5.45301	0.137931	0.02	-0.254227
ACR_S9_2	chr10	80528777	80528777	T	C	exonic	Atp8b3	NA	synonymous SNV	Atp8b3:NM_026094:exon16:c.A1581G:p.T527T	exonic	Atp8b3	NA	synonymous SNV	Atp8b3:uc007gdo.1:exon16:c.A1581G:p.T527T	exonic	ENSMUSG00000003341	NA	synonymous SNV	ENSMUSG00000003341:ENSMUST00000020383:exon16:c.A1581G:p.T527T	10qC1	NA	NA	-	GCTCCACCAGTGTGATGGTGT	chr10	80528777	CAGxGTG	T	C	75_S12_L001_R1_001	64_Jiri_S1_L001_R1_001	0	NOVEL	UNCOVERED	0.161897	0.162467	0.99649	0.99649	0	28	0	10.2668	10.4199	7.25491	6.97823	0.384615	0.02	-0.113908
ACR_S9_2	chr10	86135092	86135092	A	G	intronic	Syn3	NA	NA	NA	intronic	Syn3	NA	NA	NA	intronic	ENSMUSG00000059602	NA	NA	NA	10qC1	NA	NA	-	ATCTCAGAGCATTGCCACAGA	chr10	86135092	AGCxTTG	A	G	75_S12_L001_R1_001	64_Jiri_S1_L001_R1_001	0	NOVEL	COVERED	0.423432	0.423478	0.999892	0.999892	0.987855	44	0	25.589	25.6672	12.5616	21.1846	0.571429	0.02	-0.182605
ACR_S9_2	chr10	93474532	93474532	A	C	exonic	Lta4h	NA	nonsynonymous SNV	Lta4h:NM_008517:exon13:c.A1261C:p.T421P	exonic	Lta4h	NA	nonsynonymous SNV	Lta4h:uc007gur.1:exon13:c.A1261C:p.T421P	exonic	ENSMUSG00000015889	NA	nonsynonymous SNV	ENSMUSG00000015889:ENSMUST00000016033:exon13:c.A1261C:p.T421P	10qC2	NA	NA	+	CCAAAGTGTAACGACTGATGA	chr10	93474532	GTAxCGA	A	C	75_S12_L001_R1_001	64_Jiri_S1_L001_R1_001	0	NOVEL	COVERED	1	1	1	1	1	979	0	-53.8978	34.4514	25.0027	20.5784	0.056206	0.02	8.72721
ACR_S9_2	chr10	93969593	93969593	A	G	UTR3	Vezt	NM_172538:c.*600T>C	NA	NA	UTR3	Vezt	uc007gvh.1:c.*600T>C	NA	NA	UTR3	ENSMUSG00000036099	ENSMUST00000119818:c.*600T>C,ENSMUST00000047711:c.*600T>C	NA	NA	10qC2	NA	NA	-	TGTCCTCTTAACCTCTGCATG	chr10	93969593	TTAxCCT	A	G	75_S12_L001_R1_001	64_Jiri_S1_L001_R1_001	0	NOVEL	COVERED	0.999895	0.999895	1	1	1	222	0	-10.9653	7.44768	7.65616	0	0.05618	0.02	0.684994
ACR_S9_2	chr10	109694018	109694018	C	T	exonic	Nav3	NA	nonsynonymous SNV	Nav3:NM_001081035:exon35:c.G6461A:p.R2154K	exonic	Nav3	NA	nonsynonymous SNV	Nav3:uc007gzk.1:exon24:c.G4220A:p.R1407K,Nav3:uc007gzl.1:exon35:c.G6461A:p.R2154K	exonic	ENSMUSG00000020181	NA	nonsynonymous SNV	ENSMUSG00000020181:ENSMUST00000161582:exon24:c.G4271A:p.R1424K,ENSMUSG00000020181:ENSMUST00000032719:exon35:c.G6461A:p.R2154K	10qD1	NA	NA	-	AAGTCCTTACCTGAAATTGTG	chr10	109694018	TACxTGA	C	T	75_S12_L001_R1_001	64_Jiri_S1_L001_R1_001	0	NOVEL	COVERED	0.999317	0.999317	1	1	1	179	0	7.85215	18.321	12.7329	11.7751	0.128205	0.02	0.790979
ACR_S9_2	chr10	117687258	117687258	A	C	UTR3	Cpm	NM_027468:c.*3738A>C	NA	NA	UTR3	Cpm	uc007hdi.2:c.*3738A>C,uc007hdj.2:c.*3738A>C,uc007hdk.2:c.*3738A>C	NA	NA	UTR3	ENSMUSG00000020183	ENSMUST00000020399:c.*3738A>C	NA	NA	10qD2	NA	NA	+	AGATTATCTAAGATTACAACG	chr10	117687258	CTAxGAT	A	C	75_S12_L001_R1_001	64_Jiri_S1_L001_R1_001	0	NOVEL	COVERED	0.999997	0.999997	1	1	1	261	0	50.9041	57.0324	45.6975	19.6647	0.258621	0.02	1.79038
ACR_S9_2	chr11	32423873	32423873	A	T	UTR3	Sh3pxd2b	NM_177364:c.*312A>T	NA	NA	UTR3	Sh3pxd2b	uc007ijq.1:c.*312A>T	NA	NA	UTR3	ENSMUSG00000040711	ENSMUST00000038753:c.*312A>T	NA	NA	11qA4	NA	NA	+	CACCTGGAAGACTTCCAGACC	chr11	32423873	AAGxCTT	A	T	75_S12_L001_R1_001	64_Jiri_S1_L001_R1_001	0	NOVEL	COVERED	0.909069	0.909069	1	1	1	105	0	-0.814543	6.34268	3.09434	2.97179	0.093023	0.02	-0.376742
ACR_S9_2	chr11	66212236	66212236	G	A	UTR3	Shisa6	NM_001034874:c.*5236C>T	NA	NA	ncRNA_intronic	AK033426	NA	NA	NA	ncRNA_intronic	ENSMUSG00000084967	NA	NA	NA	11qB3	NA	NA	-	TCCCTTATATGAGGGAGGTTG	chr11	66212236	TATxAGG	G	A	75_S12_L001_R1_001	E210_S1	0	NOVEL	COVERED	0.909068	0.909069	0.999999	0.999999	0.999806	78	0	1.9496	8.18529	5.33719	2.68958	0.116279	0.02	-0.376969
ACR_S9_2	chr11	67171236	67171236	A	T	UTR5	Myh2	NM_001039545:c.-1880A>T	NA	NA	UTR5	Myh2	uc007jmb.1:c.-1880A>T,uc007jmd.2:c.-1880A>T,uc007jmc.1:c.-1880A>T	NA	NA	UTR5	ENSMUSG00000033196	ENSMUST00000170159:c.-1880A>T,ENSMUST00000018641:c.-1880A>T	NA	NA	11qB3	NA	NA	+	CTTATTTCCCAGCTGCACCTT	chr11	67171236	CCCxGCT	A	T	75_S12_L001_R1_001	64_Jiri_S1_L001_R1_001	0	NOVEL	COVERED	0.522161	0.522161	0.999999	0.999999	0.999855	60	0	37.2502	37.3959	31.8398	17.6437	0.583333	0.02	-0.210418
ACR_S9_2	chr11	80479847	80479847	C	G	UTR3	Cdk5r1	NM_009871:c.*1415C>G	NA	NA	UTR3	Cdk5r1	uc011yat.1:c.*1415C>G,uc007kmg.1:c.*1415C>G	NA	NA	UTR3	ENSMUSG00000048895	ENSMUST00000053413:c.*1415C>G	NA	NA	11qB5	NA	NA	+	TAGGTGACTGCCAACTTCTTG	chr11	80479847	CTGxCAA	C	G	75_S12_L001_R1_001	64_Jiri_S1_L001_R1_001	0	NOVEL	COVERED	0.999999	0.999999	1	1	1	302	0	65.5311	71.1627	23.1353	59.5873	0.272727	0.02	2.13405
ACR_S9_2	chr11	83663561	83663561	A	T	exonic	Ccl4	NA	nonsynonymous SNV	Ccl4:NM_013652:exon2:c.A179T:p.K60M	exonic	Ccl4	NA	nonsynonymous SNV	Ccl4:uc007kpp.1:exon2:c.A179T:p.K60M	exonic	ENSMUSG00000018930	NA	nonsynonymous SNV	ENSMUSG00000018930:ENSMUST00000019074:exon2:c.A179T:p.K60M	11qC	NA	NA	+	CTTTGCTCCAAGCCAGCTGTG	chr11	83663561	CCAxGCC	A	T	75_S12_L001_R1_001	64_Jiri_S1_L001_R1_001	0	NOVEL	COVERED	0.387402	0.387407	0.999988	0.999988	0.996292	47	0	18.4963	18.6707	2.20057	16.1156	0.4	0.02	-0.175294
ACR_S9_2	chr11	88193309	88193309	T	C	UTR3	Cuedc1	NM_198013:c.*716T>C,NM_001172099:c.*716T>C	NA	NA	UTR3	Cuedc1	uc007kvh.2:c.*716T>C,uc011ycg.1:c.*716T>C	NA	NA	UTR3	ENSMUSG00000018378	ENSMUST00000018522:c.*716T>C,ENSMUST00000154812:c.*952T>C	NA	NA	11qC	NA	NA	+	AGGCAGGGTCTTTAGTTAGGC	chr11	88193309	GTCxTTA	T	C	75_S12_L001_R1_001	64_Jiri_S1_L001_R1_001	0	NOVEL	COVERED	0.818465	0.818465	1	1	1	110	0	15.6205	17.532	6.47993	10.5709	0.257143	0.02	-0.314907
ACR_S9_2	chr11	117232508	117232508	G	T	intronic	00:00:00	NA	NA	NA	intronic	00:00:00	NA	NA	NA	UTR5	ENSMUSG00000059248	ENSMUST00000106354:c.-190G>T	NA	NA	11qE2	NA	NA	+	GTGGTAATTTGGATCTGTTCG	chr11	117232508	TTTxGAT	G	T	75_S12_L001_R1_001	64_Jiri_S1_L001_R1_001	0	NOVEL	COVERED	0.959859	0.959859	1	1	1	137	0	12.3749	16.9597	4.49561	17.1508	0.183673	0.02	-0.437798
ACR_S9_2	chr11	119147277	119147277	C	G	UTR3	Tbc1d16	NM_172443:c.*291G>C	NA	NA	UTR3	Tbc1d16	uc007mqa.2:c.*291G>C,uc007mqb.2:c.*291G>C	NA	NA	UTR3	ENSMUSG00000039976	ENSMUST00000036113:c.*291G>C	NA	NA	11qE2	NA	NA	-	CCCTGCCTTGCCCACAGCTTG	chr11	119147277	TTGxCCA	C	G	75_S12_L001_R1_001	64_Jiri_S1_L001_R1_001	0	NOVEL	COVERED	0.986153	0.986153	1	1	1	178	0	0.571478	9.86056	0	10.6697	0.101695	0.02	0.983962
ACR_S9_2	chr12	8710114	8710114	C	T	intronic	Pum2	NA	NA	NA	intronic	Pum2	NA	NA	NA	intronic	ENSMUSG00000020594	NA	NA	NA	12qA1.1	NA	NA	+	CTTTTTTTTTCTGTTCTATTA	chr12	8710114	TTTxTGT	C	T	75_S12_L001_R1_001	E210_S1	0	NOVEL	COVERED	1	1	1	1	1	234	0	-5.93231	12.6109	12.8856	0	0.136691	0.02	1.36143
ACR_S9_2	chr12	13219580	13219580	T	A	exonic	Ddx1	NA	nonsynonymous SNV	Ddx1:NM_134040:exon26:c.A2141T:p.E714V	exonic	Ddx1	NA	nonsynonymous SNV	Ddx1:uc007nbh.1:exon26:c.A2141T:p.E714V	exonic	ENSMUSG00000037149	NA	nonsynonymous SNV	ENSMUSG00000037149:ENSMUST00000071103:exon26:c.A2141T:p.E714V	12qA1.1	NA	NA	-	GGCAGCCAACTCTTGAACGGT	chr12	13219580	AACxCTT	T	A	75_S12_L001_R1_001	64_Jiri_S1_L001_R1_001	0	NOVEL	COVERED	0.760887	0.760887	1	1	1	93	0	33.5479	33.7116	25.2584	28.475	0.424242	0.02	-0.289201
ACR_S9_2	chr12	103199826	103199826	T	C	intronic	Prima1	NA	NA	NA	intronic	Prima1	NA	NA	NA	UTR3	ENSMUSG00000041669	ENSMUST00000127843:c.*73A>G,ENSMUST00000156176:c.*165A>G	NA	NA	12qE	NA	NA	-	CTAGGATTCTTTCCGATCCTC	chr12	103199826	TCTxTCC	T	C	75_S12_L001_R1_001	64_Jiri_S1_L001_R1_001	0	NOVEL	COVERED	0.552886	0.552887	0.999997	0.999997	0.99963	54	0	30.5975	30.6061	28.9684	4.63594	0.48	0.02	-0.219178
ACR_S9_2	chr12	111425191	111425191	G	C	exonic	Exoc3l4	NA	nonsynonymous SNV	Exoc3l4:NM_001289489:exon5:c.G1084C:p.A362P,Exoc3l4:NM_028807:exon5:c.G1084C:p.A362P,Exoc3l4:NM_001289487:exon6:c.G1084C:p.A362P,Exoc3l4:NM_001289488:exon6:c.G1084C:p.A362P	exonic	Exoc3l4	NA	nonsynonymous SNV	Exoc3l4:uc011yuw.2:exon4:c.G1084C:p.A362P,Exoc3l4:uc007pcx.3:exon5:c.G1084C:p.A362P,Exoc3l4:uc033gfk.1:exon5:c.G1084C:p.A362P,Exoc3l4:uc007pcv.2:exon6:c.G1084C:p.A362P,Exoc3l4:uc033gfj.1:exon6:c.G1084C:p.A362P	exonic	ENSMUSG00000021280	NA	nonsynonymous SNV	ENSMUSG00000021280:ENSMUST00000072646:exon5:c.G1084C:p.A362P	12qF1	NA	NA	+	CCCAGACTTGGCGCTGCCCAC	chr12	111425191	TTGxCGC	G	C	75_S12_L001_R1_001	64_Jiri_S1_L001_R1_001	0	NOVEL	COVERED	0.78106	0.78106	1	1	1	85	0	2.68217	7.56625	5.56375	6.09454	0.117647	0.02	-0.298071
ACR_S9_2	chr12	113071571	113071571	A	G	exonic	Pacs2	NA	nonsynonymous SNV	Pacs2:NM_001291445:exon23:c.A2504G:p.K835R,Pacs2:NM_001081170:exon24:c.A2594G:p.K865R,Pacs2:NM_001291444:exon24:c.A2600G:p.K867R	exonic	Pacs2	NA	nonsynonymous SNV	Pacs2:uc007pfs.1:exon19:c.A1397G:p.K466R,Pacs2:uc007pfq.1:exon23:c.A2504G:p.K835R,Pacs2:uc007pfp.1:exon24:c.A2600G:p.K867R,Pacs2:uc007pfr.1:exon24:c.A2594G:p.K865R	exonic	ENSMUSG00000021143	NA	nonsynonymous SNV	ENSMUSG00000021143:ENSMUST00000084891:exon24:c.A2594G:p.K865R	12qF1	NA	NA	+	AGCGATGTCAAGTTCTTCCAG	chr12	113071571	TCAxGTT	A	G	75_S12_L001_R1_001	64_Jiri_S1_L001_R1_001	0	NOVEL	COVERED	0.423432	0.423478	0.999892	0.999892	0.987855	44	0	27.6281	27.639	15.1559	25.5666	0.52381	0.02	-0.183977
ACR_S9_2	chr13	3569500	3569500	T	C	exonic	Fam208b	NA	nonsynonymous SNV	Fam208b:NM_134063:exon16:c.A6730G:p.S2244G	exonic	BC016423	NA	nonsynonymous SNV	BC016423:uc007piw.1:exon5:c.A4870G:p.S1624G,BC016423:uc007pix.1:exon16:c.A6730G:p.S2244G	exonic	ENSMUSG00000033799	NA	nonsynonymous SNV	ENSMUSG00000033799:ENSMUST00000096069:exon16:c.A6730G:p.S2244G	13qA1	NA	NA	-	AATGTTAAACTTTCTAGTATG	chr13	3569500	AACxTTC	T	C	75_S12_L001_R1_001	64_Jiri_S1_L001_R1_001	0	NOVEL	COVERED	0.995084	0.995084	1	1	1	186	0	-4.55283	7.88084	4.30153	4.76937	0.074627	0.02	1.01023
ACR_S9_2	chr13	30764978	30764978	A	C	UTR3	Irf4	NM_013674:c.*1311A>C	NA	NA	UTR3	Irf4	uc007pyz.1:c.*1311A>C,uc007pza.1:c.*1311A>C	NA	NA	UTR3	ENSMUSG00000021356	ENSMUST00000021784:c.*1311A>C,ENSMUST00000110307:c.*1311A>C	NA	NA	13qA3.2	NA	NA	+	TTTTATTTTTAAAAAGGAACC	chr13	30764978	TTTxAAA	A	C	75_S12_L001_R1_001	64_Jiri_S1_L001_R1_001	0	NOVEL	COVERED	0.999991	0.999991	1	1	1	246	0	122.23	122.302	60.3608	70.9499	0.471698	0.02	2.24939
ACR_S9_2	chr13	33041689	33041689	G	T	intergenic	Serpinb9b,Serpinb1b	dist=1131;dist=42414	NA	NA	intergenic	Serpinb9b,Serpinb1b	dist=1131;dist=42414	NA	NA	UTR3	ENSMUSG00000021403	ENSMUST00000006392:c.*1729G>T	NA	NA	13qA3.2	NA	NA	NA	ACACAGATTTGCTTTTTTTCA	chr13	33041689	TTTxCTT	G	T	75_S12_L001_R1_001	64_Jiri_S1_L001_R1_001	0	NOVEL	COVERED	0.967425	0.967425	1	1	1	109	0	-0.183533	8.25817	8.84942	0	0.096154	0.02	0.948988
ACR_S9_2	chr13	74211279	74211279	G	A	UTR3	Ahrr	NM_009644:c.*2378C>T	NA	NA	UTR3	Ahrr	uc007rev.1:c.*2378C>T,uc007rew.1:c.*2378C>T	NA	NA	UTR3	ENSMUSG00000021575	ENSMUST00000022059:c.*2378C>T	NA	NA	13qC1	NA	NA	-	CTTTCCCCCAGTCGAATCTGC	chr13	74211279	CCAxTCG	G	A	75_S12_L001_R1_001	64_Jiri_S1_L001_R1_001	0	NOVEL	COVERED	0.997898	0.997898	1	1	1	203	0	16.1337	23.2674	13.3476	13.9826	0.178082	0.02	0.860111
ACR_S9_2	chr13	113217666	113217666	G	C	UTR3	Esm1	NM_023612:c.*926G>C	NA	NA	UTR3	Esm1	uc007rxe.1:c.*926G>C	NA	NA	UTR3	ENSMUSG00000042379	ENSMUST00000038144:c.*926G>C	NA	NA	13qD2.2	NA	NA	+	ATAAAATTTTGAAAATTTTTT	chr13	113217666	TTTxAAA	G	C	75_S12_L001_R1_001	64_Jiri_S1_L001_R1_001	0	NOVEL	COVERED	1	1	1	1	1	662	0	-31.1146	9.4354	3.11746	6.71074	0.043956	0.02	2.7928
ACR_S9_2	chr14	48512016	48512016	A	C	exonic	Tmem260	NA	nonsynonymous SNV	Tmem260:NM_172600:exon16:c.A1971C:p.E657D	exonic	Tmem260	NA	nonsynonymous SNV	Tmem260:uc007tjo.2:exon16:c.A1971C:p.E657D,Tmem260:uc007tjk.2:exon17:c.A1515C:p.E505D	exonic	ENSMUSG00000036339	NA	nonsynonymous SNV	ENSMUSG00000036339:ENSMUST00000111735:exon16:c.A1971C:p.E657D,ENSMUSG00000036339:ENSMUST00000124720:exon17:c.A1515C:p.E505D	14qC1	NA	NA	+	TAGACCCTGAAGTCCTGCTGT	chr14	48512016	TGAxGTC	A	C	75_S12_L001_R1_001	64_Jiri_S1_L001_R1_001	0	NOVEL	COVERED	0.739671	0.739671	1	1	0.999997	78	0	16.4577	17.8378	14.5642	6.58688	0.28125	0.02	-0.280477
ACR_S9_2	chr14	54427178	54427178	C	T	exonic	Mrpl52	NA	synonymous SNV	Mrpl52:NM_026851:exon3:c.C94T:p.L32L	exonic	Mrpl52	NA	synonymous SNV	Mrpl52:uc007tvz.1:exon3:c.C94T:p.L32L	exonic	ENSMUSG00000010406	NA	synonymous SNV	ENSMUSG00000010406:ENSMUST00000010550:exon3:c.C94T:p.L32L	14qC2	NA	NA	+	CAGGCAAGGGCTGGCTGCCAA	chr14	54427178	GGGxTGG	C	T	75_S12_L001_R1_001	64_Jiri_S1_L001_R1_001	0	NOVEL	COVERED	0.941741	0.941741	1	1	1	98	0	-1.76624	6.38602	2.97861	6.91494	0.085106	0.02	-0.410688
ACR_S9_2	chr14	54427183	54427183	T	A	exonic	Mrpl52	NA	synonymous SNV	Mrpl52:NM_026851:exon3:c.T99A:p.A33A	exonic	Mrpl52	NA	synonymous SNV	Mrpl52:uc007tvz.1:exon3:c.T99A:p.A33A	exonic	ENSMUSG00000010406	NA	synonymous SNV	ENSMUSG00000010406:ENSMUST00000010550:exon3:c.T99A:p.A33A	14qC2	NA	NA	+	AAGGGCTGGCTGCCAACCCTT	chr14	54427183	GGCxGCC	T	A	75_S12_L001_R1_001	64_Jiri_S1_L001_R1_001	0	NOVEL	COVERED	0.934492	0.934492	1	1	1	97	0	-1.59664	6.3224	2.97345	5.74504	0.086957	0.02	-0.402637
ACR_S9_2	chr14	54427188	54427188	A	G	exonic	Mrpl52	NA	nonsynonymous SNV	Mrpl52:NM_026851:exon3:c.A104G:p.N35S	exonic	Mrpl52	NA	nonsynonymous SNV	Mrpl52:uc007tvz.1:exon3:c.A104G:p.N35S	exonic	ENSMUSG00000010406	NA	nonsynonymous SNV	ENSMUSG00000010406:ENSMUST00000010550:exon3:c.A104G:p.N35S	14qC2	NA	NA	+	CTGGCTGCCAACCCTTCCGGC	chr14	54427188	CCAxCCC	A	G	75_S12_L001_R1_001	64_Jiri_S1_L001_R1_001	0	NOVEL	COVERED	0.92664	0.92664	1	1	1	100	0	-0.497679	6.38696	3.24948	6.88599	0.095238	0.02	-0.367641
ACR_S9_2	chr14	56370932	56370932	G	A	exonic	Atp12a	NA	nonsynonymous SNV	Atp12a:NM_138652:exon4:c.G376A:p.A126T	exonic	Atp12a	NA	nonsynonymous SNV	Atp12a:uc007ubw.2:exon4:c.G376A:p.A126T	exonic	ENSMUSG00000022229	NA	nonsynonymous SNV	ENSMUSG00000022229:ENSMUST00000007340:exon4:c.G376A:p.A126T	14qC3	NA	NA	+	GTGCTGGATCGCATATGTGAT	chr14	56370932	ATCxCAT	G	A	75_S12_L001_R1_001	64_Jiri_S1_L001_R1_001	0	NOVEL	COVERED	0.385234	0.387407	0.994391	0.994391	0	33	0	5.59271	7.2672	0	7.7025	0.2	0.02	-0.175218
ACR_S9_2	chr14	60831276	60831276	T	A	exonic	Mipep	NA	nonsynonymous SNV	Mipep:NM_027436:exon13:c.T1496A:p.M499K	ncRNA_exonic	Mipep	NA	NA	NA	exonic	ENSMUSG00000021993	NA	nonsynonymous SNV	ENSMUSG00000021993:ENSMUST00000063562:exon13:c.T1496A:p.M499K	14qD1	NA	NA	+	GGCCATGCCATGCATTCAATG	chr14	60831276	CCAxGCA	T	A	75_S12_L001_R1_001	70_S7_L001_R1_001	0	NOVEL	COVERED	0.877708	0.877708	1	1	1	107	0	0.593288	6.97177	3.70844	7.26919	0.1	0.02	-0.350345
ACR_S9_2	chr15	37362964	37362964	T	G	UTR3	Grhl2	NM_026496:c.*2113T>G	NA	NA	UTR3	Grhl2	uc007vne.2:c.*2113T>G,uc007vnf.2:c.*2113T>G	NA	NA	UTR3	ENSMUSG00000022286	ENSMUST00000022895:c.*2113T>G	NA	NA	15qB3.1	NA	NA	+	CAGTGTCAGGTCCAGGATGTC	chr15	37362964	AGGxCCA	T	G	75_S12_L001_R1_001	64_Jiri_S1_L001_R1_001	0	NOVEL	COVERED	1	1	1	1	1	337	0	146.116	146.318	138.87	21.6252	0.457364	0.02	2.04661
ACR_S9_2	chr15	53065940	53065940	A	G	intergenic	Med30,Ext1	dist=335509;dist=2321	NA	NA	intergenic	Med30,Ext1	dist=335509;dist=2321	NA	NA	UTR3	ENSMUSG00000061731	ENSMUST00000077273:c.*2724T>C	NA	NA	15qC	NA	NA	NA	TTGTCAACAAAAGTGATGATA	chr15	53065940	CAAxAGT	A	G	75_S12_L001_R1_001	64_Jiri_S1_L001_R1_001	0	NOVEL	COVERED	1	1	1	1	1	809	0	43.284	84.3659	62.4044	42.4246	0.140244	0.02	6.6852
ACR_S9_2	chr15	76058022	76058022	T	G	intronic	Scrib	NA	NA	NA	intronic	Scrib	NA	NA	NA	intronic	ENSMUSG00000022568	NA	NA	NA	15qD3	NA	NA	-	CCAGGCCTACTTACCTTGGAG	chr15	76058022	TACxTAC	T	G	75_S12_L001_R1_001	64_Jiri_S1_L001_R1_001	0	NOVEL	UNCOVERED	0.023962	0.024074	0.995343	0.995343	0	19	0	9.21587	9.61114	6.34271	5.85114	0.8	0.02	-0.043775
ACR_S9_2	chr15	78926759	78926759	A	T	UTR5	Lgals1	NM_008495:c.-37A>T	NA	NA	UTR5	Lgals1	uc007wrv.1:c.-37A>T	NA	NA	UTR5	ENSMUSG00000068220	ENSMUST00000089377:c.-37A>T	NA	NA	15qE1	NA	NA	+	CTGCTGGTGGAGCAGGTCTCA	chr15	78926759	TGGxGCA	A	T	75_S12_L001_R1_001	64_Jiri_S1_L001_R1_001	0	NOVEL	COVERED	0.387406	0.387407	0.999997	0.999997	0.99963	49	0	21.5703	21.6139	22.2474	17.0762	0.45	0.02	-0.175328
ACR_S9_2	chr15	83856637	83856637	T	G	UTR3	Mpped1	NM_172610:c.*271T>G	NA	NA	UTR3	Mpped1	uc007xbk.1:c.*271T>G,uc007xbl.1:c.*271T>G,uc007xbm.1:c.*392T>G	NA	NA	UTR3	ENSMUSG00000041708	ENSMUST00000163723:c.*271T>G,ENSMUST00000046168:c.*271T>G,ENSMUST00000109470:c.*271T>G,ENSMUST00000123387:c.*534T>G	NA	NA	15qE1	NA	NA	+	TTCTAGAGCCTAACACACTCA	chr15	83856637	GCCxAAC	T	G	75_S12_L001_R1_001	64_Jiri_S1_L001_R1_001	0	NOVEL	COVERED	0.292001	0.292001	1	1	0.999912	54	0	19.0691	19.0824	11.9706	7.96915	0.529412	0.02	-0.148675
ACR_S9_2	chr15	91928275	91928275	G	A	intronic	Muc19	NA	NA	NA	intronic	Muc19	NA	NA	NA	intronic	ENSMUSG00000044021	NA	NA	NA	15qE3	NA	NA	+	AAGCATAATTGGTTCATAAAG	chr15	91928275	ATTxGTT	G	A	75_S12_L001_R1_001	64_Jiri_S1_L001_R1_001	0	NOVEL	COVERED	1	1	1	1	1	502	0	-44.0086	11.7781	7.50307	7.02474	0.037344	0.02	4.07462
ACR_S9_2	chr15	102028426	102028426	T	A	exonic	Krt18	NA	nonsynonymous SNV	Krt18:NM_010664:exon1:c.T148A:p.S50T	exonic	Krt18	NA	nonsynonymous SNV	Krt18:uc007xuj.2:exon1:c.T148A:p.S50T	exonic	ENSMUSG00000023043	NA	nonsynonymous SNV	ENSMUSG00000023043:ENSMUST00000023803:exon1:c.T148A:p.S50T	15qF2	NA	NA	+	GATATCCGTGTCCCGCTCTGT	chr15	102028426	GTGxCCC	T	A	75_S12_L001_R1_001	64_Jiri_S1_L001_R1_001	0	NOVEL	COVERED	0.877708	0.877708	1	1	1	103	0	0.383686	6.51914	7.19588	0	0.102564	0.02	-0.350527
ACR_S9_2	chr16	22053736	22053736	T	C	intergenic	Senp2,Igf2bp2	dist=4467;dist=5273	NA	NA	intergenic	Senp2,Igf2bp2	dist=4467;dist=5273	NA	NA	ncRNA_exonic	ENSMUSG00000068487	NA	NA	NA	16qB1	NA	NA	NA	ACCACCTGTGTCAGTGCCCAG	chr16	22053736	GTGxCAG	T	C	75_S12_L001_R1_001	64_Jiri_S1_L001_R1_001	0	NOVEL	COVERED	0.582929	0.58293	0.999997	0.999997	0.999646	56	0	18.0947	18.6838	8.47195	17.3429	0.333333	0.02	-0.227901
ACR_S9_2	chr16	32162575	32162575	C	A	UTR5	Nrros	NM_146069:c.-267G>T	NA	NA	UTR5	Nrros	uc007yyh.1:c.-267G>T	NA	NA	UTR5	ENSMUSG00000052384	ENSMUST00000143682:c.-14915G>T,ENSMUST00000115163:c.-267G>T	NA	NA	16qB2	NA	NA	-	TGTGTGTGCGCTCGCACACAC	chr16	32162575	GCGxTCG	C	A	75_S12_L001_R1_001	70_S7_L001_R1_001	0	NOVEL	COVERED	0.292	0.292001	0.999997	0.999997	0.998875	45	0	8.24296	8.7915	4.30117	9.41757	0.285714	0.02	-0.146979
ACR_S9_2	chr16	37835084	37835084	T	A	UTR3	Fstl1	NM_008047:c.*1158T>A	NA	NA	UTR3	Fstl1	uc007zej.1:c.*1158T>A	NA	NA	UTR3	ENSMUSG00000022816	ENSMUST00000114763:c.*1158T>A	NA	NA	16qB3	NA	NA	+	TCAGTTTACTTAGTAAACTGG	chr16	37835084	ACTxAGT	T	A	75_S12_L001_R1_001	70_S7_L001_R1_001	0	NOVEL	COVERED	0.877708	0.877708	1	1	1	133	0	0.18149	6.32001	2.97289	3.23268	0.102564	0.02	-0.350564
ACR_S9_2	chr16	55225231	55225231	G	T	UTR3	Zpld1	NM_178720:c.*1126C>A	NA	NA	UTR3	Zpld1	uc007zlk.1:c.*1126C>A	NA	NA	UTR3	ENSMUSG00000064310	ENSMUST00000143914:c.*1126C>A,ENSMUST00000036412:c.*1126C>A	NA	NA	16qC1.1	NA	NA	-	TTTTTTTTTTGGCAAAGCTGT	chr16	55225231	TTTxGCA	G	T	75_S12_L001_R1_001	E210_S1	0	NOVEL	COVERED	0.99993	0.99993	1	1	1	173	0	-3.70341	8.33197	9.7669	0	0.134831	0.02	0.76586
ACR_S9_2	chr16	91664998	91664998	A	T	intronic	Son	NA	NA	NA	exonic	Son	NA	nonsynonymous SNV	Son:uc012aii.1:exon5:c.A6220T:p.N2074Y	exonic	ENSMUSG00000022961	NA	nonsynonymous SNV	ENSMUSG00000022961:ENSMUST00000119368:exon7:c.A6790T:p.N2264Y	16qC4	NA	NA	+	AACTCGATGCAATTCACTTTG	chr16	91664998	TGCxATT	A	T	75_S12_L001_R1_001	E210_S1	0	NOVEL	COVERED	0.800245	0.800245	1	1	0.999994	78	0	2.08268	6.96823	0	7.53989	0.117647	0.02	-0.306803
ACR_S9_2	chr16	91664999	91664999	A	T	intronic	Son	NA	NA	NA	exonic	Son	NA	nonsynonymous SNV	Son:uc012aii.1:exon5:c.A6221T:p.N2074I	exonic	ENSMUSG00000022961	NA	nonsynonymous SNV	ENSMUSG00000022961:ENSMUST00000119368:exon7:c.A6791T:p.N2264I	16qC4	NA	NA	+	ACTCGATGCAATTCACTTTGT	chr16	91664999	GCAxTTC	A	T	75_S12_L001_R1_001	E210_S1	0	NOVEL	COVERED	0.800245	0.800245	1	1	0.999994	79	0	2.28366	6.92357	0	7.51713	0.121212	0.02	-0.297994
ACR_S9_2	chr16	91683604	91683604	A	C	intronic	Donson	NA	NA	NA	intronic	Donson	NA	NA	NA	intronic	ENSMUSG00000022960	NA	NA	NA	16qC4	NA	NA	-	AGGCAAGAGGACTCTTGCCTT	chr16	91683604	AGGxCTC	A	C	75_S12_L001_R1_001	70_S7_L001_R1_001	0	NOVEL	UNCOVERED	0.139529	0.139832	0.997832	0.997832	0	28	0	9.19672	9.49157	9.57715	2.10391	0.333333	0.02	-0.105208
ACR_S9_2	chr16	91683615	91683615	T	A	intronic	Donson	NA	NA	NA	intronic	Donson	NA	NA	NA	intronic	ENSMUSG00000022960	NA	NA	NA	16qC4	NA	NA	-	CTCTTGCCTTTGAAGCCGCAG	chr16	91683615	CTTxGAA	T	A	75_S12_L001_R1_001	70_S7_L001_R1_001	0	NOVEL	UNCOVERED	0.162444	0.162467	0.999859	0.999859	0	31	0	8.49532	8.92394	8.89161	2.10389	0.307692	0.02	-0.11397
ACR_S9_2	chr17	6138187	6138187	G	A	UTR5	Tulp4	NM_054040:c.-718G>A	NA	NA	ncRNA_exonic	AK163710	NA	NA	NA	UTR5	ENSMUSG00000034377	ENSMUST00000039655:c.-718G>A	NA	NA	17qA1	NA	NA	+	TGTTCCTAGGGACACAGGGCC	chr17	6138187	AGGxACA	G	A	75_S12_L001_R1_001	64_Jiri_S1_L001_R1_001	0	NOVEL	UNCOVERED	0.043583	0.043787	0.995343	0.995343	0	21	0	7.12308	7.1543	7.15439	0	0.428571	0.02	-0.061372
ACR_S9_2	chr17	12395717	12395717	A	C	exonic	Plg	NA	nonsynonymous SNV	Plg:NM_008877:exon8:c.A883C:p.T295P	exonic	Plg	NA	nonsynonymous SNV	Plg:uc008akt.2:exon8:c.A883C:p.T295P	exonic	ENSMUSG00000059481	NA	nonsynonymous SNV	ENSMUSG00000059481:ENSMUST00000014578:exon8:c.A883C:p.T295P	17qA1	NA	NA	+	GTCTGGGAAAACCTGTCAGCG	chr17	12395717	AAAxCCT	A	C	75_S12_L001_R1_001	64_Jiri_S1_L001_R1_001	0	NOVEL	COVERED	1	1	1	1	1	317	0	142.736	142.876	18.55	128.019	0.464	0.02	2.00514
ACR_S9_2	chr17	24577578	24577578	A	G	exonic	Pkd1	NA	synonymous SNV	Pkd1:NM_013630:exon17:c.A7113G:p.A2371A	exonic	Pkd1	NA	synonymous SNV	Pkd1:uc008awv.1:exon17:c.A7113G:p.A2371A	exonic	ENSMUSG00000032855	NA	synonymous SNV	ENSMUSG00000032855:ENSMUST00000035565:exon17:c.A7113G:p.A2371A	17qA3.3	NA	NA	+	CCTGCAAGGCACAAGCAGTGT	chr17	24577578	GGCxCAA	A	G	75_S12_L001_R1_001	64_Jiri_S1_L001_R1_001	0	NOVEL	UNCOVERED	0.161897	0.162467	0.99649	0.99649	0	28	0	5.62001	6.3018	4.93213	6.93241	0.25	0.02	-0.113962
ACR_S9_2	chr17	27899658	27899658	G	C	UTR3	Uhrf1bp1	NM_001080769:c.*3651G>C	NA	NA	UTR3	Uhrf1bp1	uc008bpt.1:c.*3651G>C	NA	NA	UTR3	ENSMUSG00000039512	ENSMUST00000114849:c.*3651G>C	NA	NA	17qA3.3	NA	NA	+	TGCACTGGCTGAGCCAGTGAG	chr17	27899658	GCTxAGC	G	C	75_S12_L001_R1_001	64_Jiri_S1_L001_R1_001	0	NOVEL	COVERED	0.888874	0.888875	0.999999	0.999999	0.999855	77	0	0.000699	6.62924	2.88721	3.43487	0.097561	0.02	-0.358922
ACR_S9_2	chr17	28358687	28358687	G	T	intronic	Tulp1	NA	NA	NA	UTR5	Tulp1	uc008bqu.1:c.-2482C>A	NA	NA	exonic	ENSMUSG00000037446	NA	unknown	UNKNOWN	17qA3.3	NA	NA	-	ACAGAGAGGTGACAGAGTGAG	chr17	28358687	GGTxACA	G	T	75_S12_L001_R1_001	64_Jiri_S1_L001_R1_001	0	NOVEL	COVERED	0.423478	0.423478	1	1	0.999974	59	0	5.90501	7.77477	4.18932	7.96984	0.190476	0.02	-0.18378
ACR_S9_2	chr17	32393865	32393865	A	T	exonic	Rasal3	NA	nonsynonymous SNV	Rasal3:NM_178785:exon12:c.T2114A:p.L705Q	exonic	Rasal3	NA	nonsynonymous SNV	Rasal3:uc008bwv.1:exon12:c.T2114A:p.L705Q,Rasal3:uc008bwu.1:exon14:c.T2120A:p.L707Q	exonic	ENSMUSG00000052142	NA	nonsynonymous SNV	ENSMUSG00000052142:ENSMUST00000063824:exon12:c.T2114A:p.L705Q,ENSMUSG00000052142:ENSMUST00000135618:exon13:c.T2048A:p.L683Q,ENSMUSG00000052142:ENSMUST00000137458:exon14:c.T2120A:p.L707Q	17qB1	NA	NA	-	TACCTGGTCCAGGAAGTGTTG	chr17	32393865	TCCxGGA	A	T	75_S12_L001_R1_001	64_Jiri_S1_L001_R1_001	0	NOVEL	COVERED	0.899314	0.899314	1	1	1	92	0	0.577383	6.71767	3.44845	7.61658	0.102564	0.02	-0.368183
ACR_S9_2	chr17	35848330	35848330	C	T	exonic	Mdc1	NA	nonsynonymous SNV	Mdc1:NM_001010833:exon5:c.C1601T:p.P534L	exonic	Mdc1	NA	nonsynonymous SNV	Mdc1:uc008cir.1:exon5:c.C1601T:p.P534L	exonic	ENSMUSG00000061607	NA	nonsynonymous SNV	ENSMUSG00000061607:ENSMUST00000082337:exon5:c.C1601T:p.P534L	17qB1	NA	NA	+	CACCAGGTGCCTCTAGAGGGA	chr17	35848330	TGCxTCT	C	T	75_S12_L001_R1_001	64_Jiri_S1_L001_R1_001	0	NOVEL	COVERED	0.227502	0.229173	0.992708	0.992708	0	25	0	6.79052	7.53132	8.38216	0	0.266667	0.02	-0.13146
ACR_S9_2	chr17	49070856	49070856	T	C	exonic	Lrfn2	NA	nonsynonymous SNV	Lrfn2:NM_027452:exon2:c.T964C:p.W322R	exonic	Lrfn2	NA	nonsynonymous SNV	Lrfn2:uc008cyd.2:exon2:c.T964C:p.W322R	exonic	ENSMUSG00000040490	NA	nonsynonymous SNV	ENSMUSG00000040490:ENSMUST00000046254:exon2:c.T964C:p.W322R	17qC	NA	NA	+	TTTGATCCACTGGGTTGCCCC	chr17	49070856	CACxGGG	T	C	75_S12_L001_R1_001	64_Jiri_S1_L001_R1_001	0	NOVEL	COVERED	0.835716	0.835716	1	1	0.999994	81	0	6.2272	10.0296	7.86423	3.56628	0.166667	0.02	-0.315551
ACR_S9_2	chr17	84691914	84691914	A	C	exonic	Abcg8	NA	nonsynonymous SNV	Abcg8:NM_001286005:exon3:c.A59C:p.K20T,Abcg8:NM_026180:exon4:c.A440C:p.K147T	exonic	Abcg8	NA	nonsynonymous SNV	Abcg8:uc012aya.1:exon3:c.A59C:p.K20T,Abcg8:uc008dta.2:exon4:c.A440C:p.K147T	exonic	ENSMUSG00000024254	NA	nonsynonymous SNV	ENSMUSG00000024254:ENSMUST00000170725:exon3:c.A59C:p.K20T,ENSMUSG00000024254:ENSMUST00000045714:exon4:c.A440C:p.K147T,ENSMUSG00000024254:ENSMUST00000171915:exon4:c.A437C:p.K146T	17qE4	NA	NA	+	CTGGTGAGGAAGTGCGTTGCG	chr17	84691914	GGAxGTG	A	C	75_S12_L001_R1_001	64_Jiri_S1_L001_R1_001	0	NOVEL	COVERED	0.800244	0.800245	0.999999	0.999999	0.999806	70	0	38.0254	38.0312	19.6185	33.5173	0.514286	0.02	-0.306464
ACR_S9_2	chr17	86625397	86625397	G	C	exonic	Prkce	NA	nonsynonymous SNV	Prkce:NM_011104:exon13:c.G1804C:p.A602P	exonic	Prkce	NA	nonsynonymous SNV	Prkce:uc008dug.2:exon13:c.G1804C:p.A602P,Prkce:uc008duh.2:exon14:c.G1804C:p.A602P	exonic	ENSMUSG00000045038	NA	nonsynonymous SNV	ENSMUSG00000045038:ENSMUST00000097275:exon13:c.G1804C:p.A602P,ENSMUSG00000045038:ENSMUST00000097274:exon14:c.G1804C:p.A602P	17qE4	NA	NA	+	CGAGATGATGGCTGGGCAGCC	chr17	86625397	ATGxCTG	G	C	75_S12_L001_R1_001	64_Jiri_S1_L001_R1_001	0	NOVEL	COVERED	0.800148	0.800245	0.999879	0.999879	0.986224	57	0	5.48327	9.30107	9.37343	0	0.151515	0.02	-0.304942
ACR_S9_2	chr18	20583504	20583504	G	T	intronic	Dsg2	NA	NA	NA	UTR3	Dsg2	uc008eer.1:c.*328G>T	NA	NA	UTR3	ENSMUSG00000044393	ENSMUST00000120102:c.*328G>T	NA	NA	18qA2	NA	NA	+	TATCAATGAAGGCAAAATTGA	chr18	20583504	GAAxGCA	G	T	75_S12_L001_R1_001	64_Jiri_S1_L001_R1_001	0	NOVEL	COVERED	0.717315	0.717315	1	1	0.999994	74	0	45.9471	46.1227	19.2085	33.2585	0.580645	0.02	-0.271768
ACR_S9_2	chr18	21551183	21551183	C	A	UTR3	Klhl14	NM_001081403:c.*1319G>T	NA	NA	UTR3	Klhl14	uc008efi.1:c.*1319G>T	NA	NA	UTR3	ENSMUSG00000042514	ENSMUST00000049105:c.*1319G>T,ENSMUST00000122333:c.*1319G>T	NA	NA	18qA2	NA	NA	-	TTTTGAGTTGCTAAAAACAAG	chr18	21551183	TTGxTAA	C	A	75_S12_L001_R1_001	64_Jiri_S1_L001_R1_001	0	NOVEL	COVERED	1	1	1	1	1	595	0	124.811	138.425	31.4831	110.815	0.258687	0.02	5.21481
ACR_S9_2	chr18	36296928	36296928	G	A	intergenic	Pura,Igip	dist=8684;dist=3173	NA	NA	intergenic	Pura,Igip	dist=8684;dist=3173	NA	NA	UTR3	ENSMUSG00000043991	ENSMUST00000051301:c.*8801G>A	NA	NA	18qB2	NA	NA	NA	TTGCAAAAAGGAAAAAAAAAA	chr18	36296928	AAGxAAA	G	A	75_S12_L001_R1_001	E210_S1	0	NOVEL	COVERED	0.490485	0.490544	0.999879	0.999879	0.986224	45	0	6.43102	6.59555	2.00671	4.55263	0.363636	0.02	-0.190909
ACR_S9_2	chr18	36298028	36298028	A	G	intergenic	Pura,Igip	dist=9784;dist=2073	NA	NA	intergenic	Pura,Igip	dist=9784;dist=2073	NA	NA	UTR3	ENSMUSG00000043991	ENSMUST00000051301:c.*9901A>G	NA	NA	18qB2	NA	NA	NA	ATAATTGATAAAATTAAGAGC	chr18	36298028	ATAxAAT	A	G	75_S12_L001_R1_001	64_Jiri_S1_L001_R1_001	0	NOVEL	COVERED	1	1	1	1	1	498	0	45.7696	70.9445	8.45999	67.8058	0.16087	0.02	4.36544
ACR_S9_2	chr18	47245839	47245839	A	T	UTR3	Sema6a	NM_018744:c.*2544T>A	NA	NA	UTR3	Sema6a	uc008ewa.1:c.*2544T>A,uc008ewb.1:c.*2544T>A	NA	NA	UTR3	ENSMUSG00000019647	ENSMUST00000019791:c.*2544T>A,ENSMUST00000115449:c.*2544T>A	NA	NA	18qC	NA	NA	-	TTTCTAGAAAAGCCTTTCTGG	chr18	47245839	AAAxGCC	A	T	75_S12_L001_R1_001	64_Jiri_S1_L001_R1_001	0	NOVEL	COVERED	1	1	1	1	1	393	0	33.6526	49.847	44.9035	6.77955	0.170886	0.02	3.10665
ACR_S9_2	chr18	64269611	64269611	C	A	exonic	St8sia3	NA	nonsynonymous SNV	St8sia3:NM_009182:exon5:c.C488A:p.A163D	exonic	St8sia3	NA	nonsynonymous SNV	St8sia3:uc008fed.1:exon5:c.C488A:p.A163D	exonic	ENSMUSG00000056812	NA	nonsynonymous SNV	ENSMUSG00000056812:ENSMUST00000139622:exon3:c.C320A:p.A107D,ENSMUSG00000056812:ENSMUST00000025477:exon5:c.C488A:p.A163D	18qE1	NA	NA	+	AATGTTTGTGCTGTGGTTGGA	chr18	64269611	GTGxTGT	C	A	75_S12_L001_R1_001	64_Jiri_S1_L001_R1_001	0	NOVEL	COVERED	0.999907	0.999907	1	1	1	217	0	-12.4797	7.05325	4.55693	2.48925	0.053763	0.02	0.684761
ACR_S9_2	chr18	89560127	89560127	G	A	intronic	Dok6	NA	NA	NA	intronic	Dok6	NA	NA	NA	intronic	ENSMUSG00000073514	NA	NA	NA	18qE4	NA	NA	-	CCTTAAAAGAGAAAAATATTT	chr18	89560127	AGAxAAA	G	A	75_S12_L001_R1_001	64_Jiri_S1_L001_R1_001	0	NOVEL	COVERED	0.865745	0.865745	1	1	1	92	0	0.401467	6.52126	0	6.88393	0.102564	0.02	-0.341389
ACR_S9_2	chr19	18962101	18962101	T	C	exonic	Rorb	NA	nonsynonymous SNV	Rorb:NM_001043354:exon5:c.A683G:p.Q228R,Rorb:NM_146095:exon5:c.A716G:p.Q239R,Rorb:NM_001289921:exon6:c.A461G:p.Q154R	exonic	Rorb	NA	nonsynonymous SNV	Rorb:uc008gyc.2:exon5:c.A716G:p.Q239R,Rorb:uc008gye.2:exon5:c.A683G:p.Q228R,Rorb:uc008gyd.2:exon6:c.A461G:p.Q154R	exonic	ENSMUSG00000036192	NA	nonsynonymous SNV	ENSMUSG00000036192:ENSMUST00000040153:exon5:c.A716G:p.Q239R,ENSMUSG00000036192:ENSMUST00000112832:exon5:c.A683G:p.Q228R,ENSMUSG00000036192:ENSMUST00000112828:exon6:c.A461G:p.Q154R	19qB	NA	NA	-	CATGGTGTACTGACATGTCTC	chr19	18962101	TACxGAC	T	C	75_S12_L001_R1_001	64_Jiri_S1_L001_R1_001	0	NOVEL	COVERED	0.78106	0.78106	1	1	0.999994	78	0	6.82685	10.1919	7.76533	5.12597	0.176471	0.02	-0.298028
ACR_S9_2	chr19	32757930	32757930	T	C	UTR5	Pten	NM_008960:c.-515T>C	NA	NA	UTR5	Pten	uc008hfq.1:c.-515T>C,uc008hfr.1:c.-515T>C	NA	NA	UTR5	ENSMUSG00000013663	ENSMUST00000013807:c.-515T>C	NA	NA	19qC1	NA	NA	+	CGGCTGCACCTCCCGCTCCTG	chr19	32757930	ACCxCCC	T	C	75_S12_L001_R1_001	70_S7_L001_R1_001	0	NOVEL	UNCOVERED	0.019889	0.019982	0.995343	0.995343	0	18	0	6.57592	6.35251	0	6.35251	1	0.02	-0.035071
ACR_S9_2	chr19	34690785	34690785	G	C	UTR5	Slc16a12	NM_172838:c.-32C>G	NA	NA	UTR5	Slc16a12	uc008hgu.1:c.-32C>G	NA	NA	UTR5	ENSMUSG00000009378	ENSMUST00000009522:c.-32C>G	NA	NA	19qC1	NA	NA	-	CTCTTTCCAAGTTACTGCAGC	chr19	34690785	CAAxTTA	G	C	75_S12_L001_R1_001	64_Jiri_S1_L001_R1_001	0	NOVEL	COVERED	0.717315	0.717315	1	1	0.999999	79	0	3.18398	7.33771	5.29582	8.26461	0.129032	0.02	-0.27176
ACR_S9_2	chr19	39307703	39307703	G	A	exonic	Cyp2c29	NA	nonsynonymous SNV	Cyp2c29:NM_007815:exon4:c.G577A:p.E193K	exonic	Cyp2c29	NA	nonsynonymous SNV	Cyp2c29:uc008hjz.1:exon4:c.G577A:p.E193K,Cyp2c29:uc008hjy.1:exon5:c.G460A:p.E154K	exonic	ENSMUSG00000003053	NA	nonsynonymous SNV	ENSMUSG00000003053:ENSMUST00000003137:exon4:c.G577A:p.E193K,ENSMUSG00000003053:ENSMUST00000176624:exon5:c.G460A:p.E154K	19qC3	NA	NA	+	TAAGGATAAGGAATTTCTTAT	chr19	39307703	AAGxAAT	G	A	75_S12_L001_R1_001	64_Jiri_S1_L001_R1_001	0	NOVEL	COVERED	1	1	1	1	1	257	0	-15.4709	9.54635	9.31115	3.43046	0.057377	0.02	1.70411
ACR_S9_2	chr19	39307708	39307708	T	C	exonic	Cyp2c29	NA	synonymous SNV	Cyp2c29:NM_007815:exon4:c.T582C:p.F194F	exonic	Cyp2c29	NA	synonymous SNV	Cyp2c29:uc008hjz.1:exon4:c.T582C:p.F194F,Cyp2c29:uc008hjy.1:exon5:c.T465C:p.F155F	exonic	ENSMUSG00000003053	NA	synonymous SNV	ENSMUSG00000003053:ENSMUST00000003137:exon4:c.T582C:p.F194F,ENSMUSG00000003053:ENSMUST00000176624:exon5:c.T465C:p.F155F	19qC3	NA	NA	+	ATAAGGAATTTCTTATCCTCA	chr19	39307708	ATTxCTT	T	C	75_S12_L001_R1_001	64_Jiri_S1_L001_R1_001	0	NOVEL	COVERED	0.999999	0.999999	1	1	1	255	0	-14.4436	10.3584	10.3291	3.50977	0.057851	0.02	1.90429
ACR_S9_2	chr19	42564047	42564047	A	T	exonic	R3hcc1l	NA	synonymous SNV	R3hcc1l:NM_177464:exon2:c.A1482T:p.S494S	exonic	R3hcc1l	NA	synonymous SNV	R3hcc1l:uc008hnq.1:exon2:c.A1482T:p.S494S	exonic	ENSMUSG00000025184	NA	synonymous SNV	ENSMUSG00000025184:ENSMUST00000026188:exon2:c.A1482T:p.S494S	19qC3	NA	NA	+	TGAGTATGTCAGATGCATCAG	chr19	42564047	GTCxGAT	A	T	75_S12_L001_R1_001	64_Jiri_S1_L001_R1_001	0	NOVEL	COVERED	0.668523	0.668523	1	1	0.999992	70	0	3.48302	7.16191	3.70848	3.1343	0.137931	0.02	-0.254259
ACR_S9_2	chrX	133937221	133937221	T	G	UTR3	Sytl4	NM_001290717:c.*776A>C,NM_001290718:c.*776A>C,NM_013757:c.*681A>C	NA	NA	UTR3	Sytl4	uc009ufe.1:c.*681A>C,uc009uff.1:c.*776A>C,uc009ufg.1:c.*776A>C	NA	NA	UTR3	ENSMUSG00000031255	ENSMUST00000113297:c.*776A>C,ENSMUST00000033608:c.*681A>C	NA	NA	XqE3	NA	NA	-	AAAGTGATTTTTCTACAGTGA	chrX	133937221	TTTxTCT	T	G	75_S12_L001_R1_001	64_Jiri_S1_L001_R1_001	0	NOVEL	COVERED	0.877708	0.877708	1	1	1	114	0	15.9588	18.737	12.9656	14.1047	0.225	0.02	-0.350643
ACR_S9_2	chrX	136079111	136079111	A	C	intronic	Nxf3	NA	NA	NA	intronic	Nxf3	NA	NA	NA	intronic	ENSMUSG00000057000	NA	NA	NA	XqF1	NA	NA	-	AGTGATAAAAAGATGGGAAGA	chrX	136079111	AAAxGAT	A	C	75_S12_L001_R1_001	64_Jiri_S1_L001_R1_001	0	NOVEL	COVERED	0.52216	0.522161	0.999998	0.999998	0.999763	58	0	9.7343	10.6056	4.2014	10.0615	0.285714	0.02	-0.209899
ACR_S9_2	chrX	164072003	164072003	T	C	exonic	Siah1b	NA	nonsynonymous SNV	Siah1b:NM_009173:exon4:c.A80G:p.D27G	exonic	Siah1b	NA	nonsynonymous SNV	Siah1b:uc033jvk.1:exon1:c.A80G:p.D27G,Siah1b:uc009uvd.1:exon4:c.A80G:p.D27G	exonic	ENSMUSG00000040749	NA	nonsynonymous SNV	ENSMUSG00000040749:ENSMUST00000037928:exon4:c.A80G:p.D27G,ENSMUSG00000040749:ENSMUST00000071667:exon4:c.A80G:p.D27G,ENSMUSG00000040749:ENSMUST00000134272:exon4:c.A80G:p.D27G	XqF5	NA	NA	-	TGCAGTTGTGTCAGTCAAGGC	chrX	164072003	GTGxCAG	T	C	75_S12_L001_R1_001	64_Jiri_S1_L001_R1_001	0	NOVEL	COVERED	0.800245	0.800245	0.999999	0.999999	0.999855	72	1	5.06149	9.35926	0	10.0626	0.142857	0.02	-0.306741
ACR_S9_2	chrX	74127520	74127520	T	G	exonic	Opn1mw	NA	nonsynonymous SNV	Opn1mw:NM_008106:exon1:c.T14G:p.L5R	exonic	Opn1mw	NA	nonsynonymous SNV	Opn1mw:uc009tnv.1:exon1:c.T14G:p.L5R,Opn1mw:uc012hkp.1:exon1:c.T14G:p.L5R	exonic	ENSMUSG00000031394	NA	nonsynonymous SNV	ENSMUSG00000031394:ENSMUST00000033771:exon1:c.T14G:p.L5R,ENSMUSG00000031394:ENSMUST00000101457:exon1:c.T14G:p.L5R	XqA7.3	NA	NA	+	GCCCAAAGGCTTACAGGTGAA	chrX	74127520	GGCxTAC	T	G	75_S12_L001_R1_001	64_Jiri_S1_L001_R1_001	0	NOVEL	COVERED	0.717313	0.717315	0.999997	0.999997	0.999646	61	0	25.088	25.435	12.1225	21.7468	0.387097	0.02	-0.271578
ACR_S9_2	chrX	79277809	79277809	T	C	intergenic	Fam47c,Gm8787	dist=538399;dist=52704	NA	NA	intergenic	Fam47c,Gm8787	dist=538399;dist=52704	NA	NA	ncRNA_exonic	ENSMUSG00000071735	NA	NA	NA	XqB	NA	NA	NA	AAATGGCTCATAATACCTAGA	chrX	79277809	TCAxAAT	T	C	75_S12_L001_R1_001	64_Jiri_S1_L001_R1_001	0	NOVEL	COVERED	1	1	1	1	1	376	0	180.493	180.628	102.911	110.344	0.46875	0.02	3.28413
ACR_S9_2	chrX	8250468	8250468	C	A	exonic	Ftsj1	NA	nonsynonymous SNV	Ftsj1:NM_001290430:exon4:c.G210T:p.Q70H,Ftsj1:NM_133991:exon4:c.G210T:p.Q70H	exonic	Ftsj1	NA	nonsynonymous SNV	Ftsj1:uc009sop.1:exon4:c.G210T:p.Q70H,Ftsj1:uc009soq.1:exon4:c.G210T:p.Q70H,Ftsj1:uc009sor.1:exon4:c.G210T:p.Q70H	exonic	ENSMUSG00000031171	NA	nonsynonymous SNV	ENSMUSG00000031171:ENSMUST00000033513:exon4:c.G210T:p.Q70H,ENSMUSG00000031171:ENSMUST00000115594:exon4:c.G210T:p.Q70H,ENSMUSG00000031171:ENSMUST00000115595:exon4:c.G210T:p.Q70H	XqA1.1	NA	NA	-	CGGCCACCACCTGACCAGAAC	chrX	8250468	CACxTGA	C	A	75_S12_L001_R1_001	64_Jiri_S1_L001_R1_001	0	NOVEL	COVERED	0.387372	0.387407	0.999909	0.999909	0.989678	44	0	6.50144	7.96713	1.71584	6.08607	0.210526	0.02	-0.175118
ACR_S9_2	chrX	9257971	9257971	T	A	exonic	Lancl3	NA	synonymous SNV	Lancl3:NM_173414:exon4:c.T921A:p.A307A	exonic	Lancl3	NA	synonymous SNV	Lancl3:uc009spo.1:exon4:c.T921A:p.A307A	exonic	ENSMUSG00000047344	NA	synonymous SNV	ENSMUSG00000047344:ENSMUST00000069763:exon4:c.T921A:p.A307A	XqA1.1	NA	NA	+	TTGCCAAAGCTTATCTCATTT	chrX	9257971	AGCxTAT	T	A	75_S12_L001_R1_001	64_Jiri_S1_L001_R1_001	0	NOVEL	COVERED	0.612405	0.612407	0.999997	0.999997	0.999646	57	0	10.4504	12.1695	8.1862	5.6954	0.230769	0.02	-0.236447
ACR_S9_2	chrX	89753255	89753255	A	G	exonic	4932429P05Rik	NA	nonsynonymous SNV	4932429P05Rik:NM_001085511:exon2:c.A692G:p.D231G	exonic	4932429P05Rik	NA	nonsynonymous SNV	4932429P05Rik:uc033jrd.1:exon1:c.A692G:p.D231G,4932429P05Rik:uc009tsh.1:exon2:c.A692G:p.D231G	exonic	ENSMUSG00000079513	NA	nonsynonymous SNV	ENSMUSG00000079513:ENSMUST00000113958:exon2:c.A692G:p.D231G	XqC1	NA	NA	+	CCTGCTTTGGATCACCCAAAG	chrX	89753255	TGGxTCA	A	G	75_S12_L001_R1_001	70_S7_L001_R1_001	0	NOVEL	COVERED	0.999997	0.999997	1	1	1	279	0	-11.9448	9.81195	0	10.4926	0.070175	0.02	1.40916
ACR_S9_2	chrX	89753257	89753257	C	G	exonic	4932429P05Rik	NA	nonsynonymous SNV	4932429P05Rik:NM_001085511:exon2:c.C694G:p.H232D	exonic	4932429P05Rik	NA	nonsynonymous SNV	4932429P05Rik:uc033jrd.1:exon1:c.C694G:p.H232D,4932429P05Rik:uc009tsh.1:exon2:c.C694G:p.H232D	exonic	ENSMUSG00000079513	NA	nonsynonymous SNV	ENSMUSG00000079513:ENSMUST00000113958:exon2:c.C694G:p.H232D	XqC1	NA	NA	+	TGCTTTGGATCACCCAAAGCA	chrX	89753257	GATxACC	C	G	75_S12_L001_R1_001	70_S7_L001_R1_001	0	NOVEL	COVERED	0.999992	0.999992	1	1	1	273	0	-7.48599	12.302	0	12.9622	0.074766	0.02	1.85318
ACR_S9_2	chrX	38613211	38613211	C	T	intronic	Mcts1	NA	NA	NA	intronic	Mcts1	NA	NA	NA	intronic	ENSMUSG00000000355	NA	NA	NA	XqA3.3	NA	NA	+	GTTTTTTTTTCCTTCTGCAGT	chrX	38613211	TTTxCTT	C	T	75_S12_L001_R1_001	E210_S1	0	NOVEL	COVERED	0.76078	0.760887	0.99986	0.99986	0.982485	52	0	3.7837	6.52211	7.91555	0	0.212121	0.02	-0.285566
ACR_1	chr1	25112206	25112206	A	C	exonic	Bai3	NA	synonymous SNV	Bai3:NM_175642:exon24:c.T3258G:p.A1086A	exonic	Bai3	NA	synonymous SNV	Bai3:uc007amy.1:exon8:c.T648G:p.A216A,Bai3:uc011wis.1:exon24:c.T3258G:p.A1086A	exonic	ENSMUSG00000033569	NA	synonymous SNV	ENSMUSG00000033569:ENSMUST00000126626:exon9:c.T648G:p.A216A,ENSMUSG00000033569:ENSMUST00000041838:exon23:c.T3258G:p.A1086A,ENSMUSG00000033569:ENSMUST00000151309:exon24:c.T3258G:p.A1086A,ENSMUSG00000033569:ENSMUST00000135518:exon25:c.T3258G:p.A1086A	1qA5	NA	NA	-	TGGCTGACAAAGCTGTTGTAG	chr1	25112206	CAAxGCT	A	C	67_S4_L001_R1_001	64_Jiri_S1_L001_R1_001	0	NOVEL	COVERED	0.818465	0.818465	1	1	0.999997	82	0	6.4868	9.66173	3.49963	7.78727	0.194444	0.02	-0.31513
ACR_1	chr1	31196738	31196738	T	G	ncRNA_intronic	4931428L18Rik	NA	NA	NA	intronic	4931428L18Rik,Lgsn	NA	NA	NA	intronic	ENSMUSG00000050217,ENSMUSG00000086727	NA	NA	NA	1qB	NA	NA	-	CTTATTGCCTTTTGGTCCATC	chr1	31196738	CCTxTTG	T	G	67_S4_L001_R1_001	64_Jiri_S1_L001_R1_001	0	NOVEL	COVERED	0.260399	0.260965	0.997832	0.997832	0	32	0	7.89344	8.80223	9.3915	0	0.25	0.02	-0.140283
ACR_1	chr1	53282114	53282114	T	A	intronic	Pms1	NA	NA	NA	intronic	Pms1	NA	NA	NA	UTR5	ENSMUSG00000026098	ENSMUST00000133358:c.-42A>T	NA	NA	1qC1.1	NA	NA	-	TCATAAGGAGTGAAAATAAGA	chr1	53282114	GAGxGAA	T	A	67_S4_L001_R1_001	E210_S1	0	NOVEL	COVERED	0.993701	0.993703	0.999998	0.999998	0.999763	99	0	2.18458	8.44079	8.92178	0	0.169492	0.02	0.570164
ACR_1	chr1	68034969	68034969	C	G	intergenic	Cps1,Erbb4	dist=803702;dist=4997	NA	NA	intergenic	BC108272,Erbb4	dist=710593;dist=4997	NA	NA	UTR3	ENSMUSG00000062209	ENSMUST00000119142:c.*5072G>C,ENSMUST00000121473:c.*5072G>C	NA	NA	1qC3	NA	NA	NA	AACAACCAGTCTCTGGTTGTT	chr1	68034969	AGTxTCT	C	G	67_S4_L001_R1_001	64_Jiri_S1_L001_R1_001	0	NOVEL	COVERED	0.998867	0.998867	1	1	1	178	0	-6.45692	7.49793	6.87404	1.01016	0.068493	0.02	0.732347
ACR_1	chr1	74394954	74394954	C	G	exonic	Ctdsp1	NA	nonsynonymous SNV	Ctdsp1:NM_153088:exon6:c.C589G:p.R197G	exonic	Ctdsp1	NA	nonsynonymous SNV	Ctdsp1:uc007blz.2:exon6:c.C589G:p.R197G	exonic	ENSMUSG00000026176	NA	nonsynonymous SNV	ENSMUSG00000026176:ENSMUST00000027367:exon6:c.C589G:p.R197G	1qC3	NA	NA	+	CAGGCTGGGCCGAGACCTGCG	chr1	74394954	GGCxGAG	C	G	67_S4_L001_R1_001	64_Jiri_S1_L001_R1_001	0	NOVEL	COVERED	0.818462	0.818465	0.999997	0.999997	0.998875	65	1	3.52241	7.09289	5.31911	1.68595	0.15625	0.02	-0.313816
ACR_1	chr1	91115629	91115629	G	C	exonic	Lrrfip1	NA	synonymous SNV	Lrrfip1:NM_001111311:exon8:c.G1755C:p.V585V	exonic	Lrrfip1	NA	synonymous SNV	Lrrfip1:uc007bzu.2:exon4:c.G1038C:p.V346V,Lrrfip1:uc007bzr.2:exon8:c.G1755C:p.V585V	exonic	ENSMUSG00000026305	NA	synonymous SNV	ENSMUSG00000026305:ENSMUST00000097649:exon8:c.G1755C:p.V585V	1qD	NA	NA	+	ACCCAGATGTGGGTGACATGG	chr1	91115629	TGTxGGT	G	C	67_S4_L001_R1_001	64_Jiri_S1_L001_R1_001	0	NOVEL	COVERED	0.877705	0.877708	0.999997	0.999997	0.999646	70	0	2.14733	7.42057	4.38206	6.14282	0.128205	0.02	-0.350594
ACR_1	chr1	139237139	139237139	G	T	exonic	Crb1	NA	nonsynonymous SNV	Crb1:NM_133239:exon9:c.C3429A:p.H1143Q	exonic	Crb1	NA	nonsynonymous SNV	Crb1:uc007cwd.1:exon8:c.C3246A:p.H1082Q,Crb1:uc007cwc.1:exon9:c.C3429A:p.H1143Q	exonic	ENSMUSG00000063681	NA	nonsynonymous SNV	ENSMUSG00000063681:ENSMUST00000131586:exon8:c.C3246A:p.H1082Q,ENSMUSG00000063681:ENSMUST00000059825:exon9:c.C3429A:p.H1143Q,ENSMUSG00000063681:ENSMUST00000145244:exon9:c.C3429A:p.H1143Q	1qE4	NA	NA	-	AGGGGCTGGAGTGGCAGGCAT	chr1	139237139	GGAxTGG	G	T	67_S4_L001_R1_001	64_Jiri_S1_L001_R1_001	0	NOVEL	COVERED	0.979526	0.979526	1	1	1	113	0	19.8281	24.0117	19.9509	6.5831	0.214286	0.02	1.10757
ACR_1	chr1	140101675	140101675	T	A	exonic	Cfh	NA	nonsynonymous SNV	Cfh:NM_009888:exon18:c.A2935T:p.T979S	exonic	Cfh	NA	nonsynonymous SNV	Cfh:uc007cwt.1:exon17:c.A2764T:p.T922S,Cfh:uc007cws.1:exon18:c.A2935T:p.T979S	exonic	ENSMUSG00000026365	NA	nonsynonymous SNV	ENSMUSG00000026365:ENSMUST00000111977:exon17:c.A2710T:p.T904S,ENSMUSG00000026365:ENSMUST00000066859:exon18:c.A2881T:p.T961S,ENSMUSG00000026365:ENSMUST00000111976:exon18:c.A2935T:p.T979S,ENSMUSG00000026365:ENSMUST00000123238:exon18:c.A2881T:p.T961S	1qF	NA	NA	-	CAATGGTATGTAACCTCTTCC	chr1	140101675	ATGxAAC	T	A	67_S4_L001_R1_001	64_Jiri_S1_L001_R1_001	0	NOVEL	COVERED	0.999862	0.999862	1	1	1	177	3	19.5825	29.0619	13.3287	21.559	0.166667	0.02	0.702279
ACR_1	chr1	161045095	161045095	T	A	intronic	Dars2	NA	NA	NA	UTR3	Dars2	uc007dez.1:c.*139A>T	NA	NA	intronic	ENSMUSG00000026709	NA	NA	NA	1qH2.1	NA	NA	-	ACTTTTCTGTTACAGAAAACT	chr1	161045095	TGTxACA	T	A	67_S4_L001_R1_001	64_Jiri_S1_L001_R1_001	0	NOVEL	COVERED	0.998867	0.998867	1	1	1	163	0	-3.97235	9.24286	4.21708	5.00021	0.081081	0.02	0.729174
ACR_1	chr1	162795079	162795079	G	T	exonic	Fmo4	NA	nonsynonymous SNV	Fmo4:NM_144878:exon8:c.C1220A:p.A407D	exonic	Fmo4	NA	nonsynonymous SNV	Fmo4:uc007dgv.1:exon8:c.C1220A:p.A407D	exonic	ENSMUSG00000026692	NA	nonsynonymous SNV	ENSMUSG00000026692:ENSMUST00000028014:exon8:c.C1220A:p.A407D,ENSMUSG00000026692:ENSMUST00000111525:exon9:c.C1220A:p.A407D	1qH2.1	NA	NA	-	CGTTTTAGTGGCTTCGGCCAT	chr1	162795079	GTGxCTT	G	T	67_S4_L001_R1_001	64_Jiri_S1_L001_R1_001	0	NOVEL	COVERED	0.996724	0.996724	1	1	1	146	0	12.9052	20.7436	7.50155	17.357	0.157143	0.02	0.886675
ACR_1	chr1	170668951	170668951	G	T	exonic	Olfml2b	NA	nonsynonymous SNV	Olfml2b:NM_177068:exon6:c.G1150T:p.V384F	exonic	Olfml2b	NA	nonsynonymous SNV	Olfml2b:uc007dmi.2:exon6:c.G1150T:p.V384F	exonic	ENSMUSG00000038463	NA	nonsynonymous SNV	ENSMUSG00000038463:ENSMUST00000046792:exon6:c.G1150T:p.V384F	1qH3	NA	NA	+	ATCCAGCTTTGTTGAGCCTGC	chr1	170668951	TTTxTTG	G	T	67_S4_L001_R1_001	64_Jiri_S1_L001_R1_001	0	NOVEL	COVERED	0.229163	0.229173	0.999957	0.999957	0.993897	41	0	5.63952	6.67934	0	7.5334	0.214286	0.02	-0.131091
ACR_1	chr2	13578633	13578633	G	C	exonic	Vim	NA	nonsynonymous SNV	Vim:NM_011701:exon4:c.G765C:p.Q255H	exonic	Vim	NA	nonsynonymous SNV	Vim:uc008ikb.2:exon4:c.G765C:p.Q255H	exonic	ENSMUSG00000026728	NA	nonsynonymous SNV	ENSMUSG00000026728:ENSMUST00000028062:exon4:c.G765C:p.Q255H	2qA1	NA	NA	+	AGCATGTCCAGATCGATGTGG	chr2	13578633	CCAxATC	G	C	67_S4_L001_R1_001	70_S7_L001_R1_001	0	NOVEL	COVERED	0.899314	0.899314	1	1	1	92	0	0.377778	7.02475	0	7.42382	0.097561	0.02	-0.368161
ACR_1	chr2	14981273	14981273	T	G	intronic	Cacnb2	NA	NA	NA	intronic	Cacnb2	NA	NA	NA	intronic	ENSMUSG00000057914	NA	NA	NA	2qA2	NA	NA	+	ATGTGTCCTTTTAAATAAGCG	chr2	14981273	CTTxTAA	T	G	67_S4_L001_R1_001	64_Jiri_S1_L001_R1_001	0	NOVEL	COVERED	1	1	1	1	1	273	0	2.07948	22.2123	16.746	7.99371	0.107692	0.02	1.95914
ACR_1	chr2	18211967	18211967	A	G	UTR3	Mllt10	NM_010804:c.*1155A>G,NM_001252561:c.*1155A>G,NM_001252560:c.*1155A>G	NA	NA	UTR3	Mllt10	uc008ilm.2:c.*1155A>G,uc008ilr.2:c.*1155A>G,uc008ilp.2:c.*1155A>G,uc008ilq.2:c.*1155A>G,uc008ils.2:c.*1155A>G	NA	NA	UTR3	ENSMUSG00000026743	ENSMUST00000028076:c.*1155A>G,ENSMUST00000114671:c.*1155A>G,ENSMUST00000114669:c.*1155A>G	NA	NA	2qA3	NA	NA	+	CTGCAGTTCGACCTCCACTGT	chr2	18211967	TCGxCCT	A	G	67_S4_L001_R1_001	E210_S1	0	NOVEL	COVERED	1	1	1	1	0.999999	225	0	-24.5503	12.1067	12.6173	0	0.052023	0.02	2.95957
ACR_1	chr2	20807262	20807262	T	G	exonic	Etl4	NA	synonymous SNV	Etl4:NM_001177631:exon18:c.T5001G:p.G1667G,Etl4:NM_001081006:exon20:c.T5259G:p.G1753G	exonic	Etl4	NA	synonymous SNV	Etl4:uc008imq.1:exon18:c.T5001G:p.G1667G,Etl4:uc008imm.1:exon20:c.T5259G:p.G1753G	exonic	ENSMUSG00000036617	NA	synonymous SNV	ENSMUSG00000036617:ENSMUST00000114608:exon14:c.T4155G:p.G1385G,ENSMUSG00000036617:ENSMUST00000066509:exon19:c.T5106G:p.G1702G,ENSMUSG00000036617:ENSMUST00000114627:exon20:c.T5259G:p.G1753G	2qA3	NA	NA	+	GAGATTGTGGTGCAAGCTTGC	chr2	20807262	TGGxGCA	T	G	67_S4_L001_R1_001	E210_S1	0	NOVEL	COVERED	0.353179	0.353947	0.997832	0.997832	0	35	0	6.08852	7.37084	3.0122	6.95421	0.222222	0.02	-0.157751
ACR_1	chr2	20807273	20807273	C	A	exonic	Etl4	NA	nonsynonymous SNV	Etl4:NM_001177631:exon18:c.C5012A:p.P1671H,Etl4:NM_001081006:exon20:c.C5270A:p.P1757H	exonic	Etl4	NA	nonsynonymous SNV	Etl4:uc008imq.1:exon18:c.C5012A:p.P1671H,Etl4:uc008imm.1:exon20:c.C5270A:p.P1757H	exonic	ENSMUSG00000036617	NA	nonsynonymous SNV	ENSMUSG00000036617:ENSMUST00000114608:exon14:c.C4166A:p.P1389H,ENSMUSG00000036617:ENSMUST00000066509:exon19:c.C5117A:p.P1706H,ENSMUSG00000036617:ENSMUST00000114627:exon20:c.C5270A:p.P1757H	2qA3	NA	NA	+	GCAAGCTTGCCCCACATGGCC	chr2	20807273	TGCxCCA	C	A	67_S4_L001_R1_001	E210_S1	0	NOVEL	COVERED	0.353897	0.353947	0.99986	0.99986	0.982485	38	0	6.59187	8.06446	3.73323	6.93215	0.210526	0.02	-0.166554
ACR_1	chr2	26907234	26907234	C	G	UTR3	Med22	NM_011513:c.*849G>C	NA	NA	UTR3	Med22	uc008iwe.1:c.*849G>C	NA	NA	UTR3	ENSMUSG00000015776	ENSMUST00000102899:c.*849G>C	NA	NA	2qA3	NA	NA	-	AAGATGTCCACTGCAGCACTG	chr2	26907234	CCAxTGC	C	G	67_S4_L001_R1_001	E210_S1	0	NOVEL	COVERED	0.999559	0.999559	1	1	1	133	0	-0.645141	12.9117	6.87108	5.73749	0.096386	0.02	0.765038
ACR_1	chr2	26907242	26907242	C	G	UTR3	Med22	NM_011513:c.*841G>C	NA	NA	UTR3	Med22	uc008iwe.1:c.*841G>C	NA	NA	UTR3	ENSMUSG00000015776	ENSMUST00000102899:c.*841G>C	NA	NA	2qA3	NA	NA	-	CACTGCAGCACTGGACATCTG	chr2	26907242	GCAxTGG	C	G	67_S4_L001_R1_001	E210_S1	0	NOVEL	COVERED	0.998696	0.998696	1	1	0.999995	121	0	2.08142	13.5809	7.31392	7.94378	0.106667	0.02	0.835597
ACR_1	chr2	26933434	26933434	C	G	UTR5	Surf4	NM_011512:c.-112G>C	NA	NA	UTR5	Surf4	uc008iwl.2:c.-112G>C	NA	NA	UTR5	ENSMUSG00000014867	ENSMUST00000015011:c.-112G>C	NA	NA	2qA3	NA	NA	-	CTAGCGGCTGCCACGTAGGCC	chr2	26933434	CTGxCAC	C	G	67_S4_L001_R1_001	64_Jiri_S1_L001_R1_001	0	NOVEL	UNCOVERED	0.098994	0.099721	0.992708	0.992708	0	20	0	6.02156	6.37887	0	7.22357	0.3	0.02	-0.087651
ACR_1	chr2	32452635	32452635	C	T	exonic	Naif1	NA	nonsynonymous SNV	Naif1:NM_194335:exon1:c.C197T:p.P66L	exonic	Naif1	NA	nonsynonymous SNV	Naif1:uc008jfr.1:exon1:c.C197T:p.P66L	exonic	ENSMUSG00000039164	NA	nonsynonymous SNV	ENSMUSG00000039164:ENSMUST00000048431:exon1:c.C197T:p.P66L	2qB	NA	NA	+	AGGGAGCTGCCCGAAGTCAAG	chr2	32452635	TGCxCGA	C	T	67_S4_L001_R1_001	64_Jiri_S1_L001_R1_001	0	NOVEL	COVERED	0.45615	0.457757	0.99649	0.99649	0	37	0	5.89332	7.98254	9.19272	3.73939	0.181818	0.02	-0.192793
ACR_1	chr2	32619876	32619876	G	C	UTR3	St6galnac6	NM_001025311:c.*347G>C,NM_001289548:c.*136G>C,NM_001025310:c.*347G>C,NM_001289547:c.*136G>C,NM_001289549:c.*347G>C,NM_016973:c.*347G>C	NA	NA	UTR3	St6galnac6	uc008jga.2:c.*347G>C,uc008jgf.2:c.*136G>C,uc008jgb.2:c.*347G>C,uc008jgd.2:c.*347G>C,uc033hmn.1:c.*136G>C,uc008jgc.2:c.*347G>C	NA	NA	UTR3	ENSMUSG00000026811	ENSMUST00000095045:c.*347G>C,ENSMUST00000113290:c.*347G>C,ENSMUST00000095044:c.*347G>C,ENSMUST00000183538:c.*622G>C,ENSMUST00000072111:c.*347G>C,ENSMUST00000081879:c.*347G>C	NA	NA	2qB	NA	NA	+	CCCAGGAATGGGCCCCCAAAT	chr2	32619876	ATGxGCC	G	C	67_S4_L001_R1_001	64_Jiri_S1_L001_R1_001	0	NOVEL	COVERED	0.989542	0.989542	1	1	1	119	0	53.4233	53.4896	30.9674	24.0579	0.466667	0.02	0.97944
ACR_1	chr2	34807148	34807148	C	A	UTR3	Fbxw2	NM_001164769:c.*126G>T	NA	NA	ncRNA_intronic	AK019757	NA	NA	NA	UTR3	ENSMUSG00000035949	ENSMUST00000113075:c.*126G>T	NA	NA	2qB	NA	NA	-	ATCACCACCACCACCCCACCA	chr2	34807148	CCAxCAC	C	A	67_S4_L001_R1_001	64_Jiri_S1_L001_R1_001	0	NOVEL	COVERED	0.998465	0.998465	1	1	1	181	0	-2.4962	9.50408	2.66458	6.78238	0.09589	0.02	0.747518
ACR_1	chr2	36116887	36116887	T	C	UTR3	Rbm18	NM_026434:c.*928A>G,NM_001159635:c.*928A>G	NA	NA	UTR3	Rbm18	uc012buo.1:c.*928A>G,uc008jlh.2:c.*928A>G,uc008jli.2:c.*928A>G	NA	NA	UTR3	ENSMUSG00000026889	ENSMUST00000028251:c.*928A>G	NA	NA	2qB	NA	NA	-	CAGCTGCTTCTTACAGCCCCA	chr2	36116887	TTCxTAC	T	C	67_S4_L001_R1_001	64_Jiri_S1_L001_R1_001	0	NOVEL	COVERED	0.999919	0.999919	1	1	1	182	0	19.7604	29.6514	24.6917	7.28111	0.168421	0.02	0.667449
ACR_1	chr2	70522405	70522405	T	A	ncRNA_intronic	Gad1os	NA	NA	NA	ncRNA_intronic	Gad1os	NA	NA	NA	ncRNA_intronic	ENSMUSG00000087264	NA	NA	NA	2qC2	NA	NA	-	ATGCGTCACATTGAGACGCAT	chr2	70522405	ACAxTGA	T	A	67_S4_L001_R1_001	70_S7_L001_R1_001	0	NOVEL	COVERED	0.888875	0.888875	1	1	1	94	0	-0.016891	6.37494	4.57814	1.43044	0.1	0.02	-0.359033
ACR_1	chr2	70522408	70522408	A	T	ncRNA_intronic	Gad1os	NA	NA	NA	ncRNA_intronic	Gad1os	NA	NA	NA	ncRNA_intronic	ENSMUSG00000087264	NA	NA	NA	2qC2	NA	NA	-	CGTCACATTGAGACGCATGGG	chr2	70522408	TTGxGAC	A	T	67_S4_L001_R1_001	70_S7_L001_R1_001	0	NOVEL	COVERED	0.877708	0.877708	1	1	1	96	0	0.392428	6.52027	6.77071	0	0.102564	0.02	-0.350353
ACR_1	chr2	132905251	132905251	T	A	UTR3	Fermt1	NM_198029:c.*1417A>T	NA	NA	UTR3	Fermt1	uc008mno.1:c.*1417A>T	NA	NA	UTR3	ENSMUSG00000027356	ENSMUST00000038280:c.*1417A>T	NA	NA	2qF2	NA	NA	-	TGAGTTCGTGTGGAAGGAGAA	chr2	132905251	GTGxGGA	T	A	67_S4_L001_R1_001	64_Jiri_S1_L001_R1_001	0	NOVEL	COVERED	0.800243	0.800245	0.999997	0.999997	0.999667	66	0	13.5879	15.7695	3.5399	12.0686	0.235294	0.02	-0.306457
ACR_1	chr2	146242899	146242899	A	T	UTR3	Ralgapa2	NM_001033348:c.*2172T>A	NA	NA	UTR3	Ralgapa2	uc008msj.2:c.*2172T>A	NA	NA	UTR3	ENSMUSG00000037110	ENSMUST00000109986:c.*2172T>A	NA	NA	2qG1	NA	NA	-	CCTGAAGATAAGTGTTCCTGC	chr2	146242899	ATAxGTG	A	T	67_S4_L001_R1_001	64_Jiri_S1_L001_R1_001	0	NOVEL	COVERED	1	1	1	1	1	354	0	21.8956	45.043	13.8202	35.3164	0.137363	0.02	2.89611
ACR_1	chr2	150625036	150625036	T	C	exonic	Acss1	NA	nonsynonymous SNV	Acss1:NM_080575:exon11:c.A1640G:p.N547S	exonic	Acss1	NA	nonsynonymous SNV	Acss1:uc008muf.2:exon11:c.A1640G:p.N547S	exonic	ENSMUSG00000027452	NA	nonsynonymous SNV	ENSMUSG00000027452:ENSMUST00000028944:exon11:c.A1640G:p.N547S	2qG3	NA	NA	-	ACCACTGATATTGATGACATC	chr2	150625036	ATAxTGA	T	C	67_S4_L001_R1_001	64_Jiri_S1_L001_R1_001	0	NOVEL	COVERED	0.918171	0.918171	1	1	0.999993	86	0	19.2682	21.4593	7.3708	15.4932	0.261905	0.02	-0.385268
ACR_1	chr2	157187998	157187998	A	T	exonic	Rbl1	NA	stopgain	Rbl1:NM_001139516:exon11:c.T1404A:p.Y468X,Rbl1:NM_011249:exon11:c.T1404A:p.Y468X	exonic	Rbl1	NA	stopgain	Rbl1:uc008noq.2:exon11:c.T1404A:p.Y468X,Rbl1:uc008nor.2:exon11:c.T1404A:p.Y468X,Rbl1:uc008nos.2:exon11:c.T1404A:p.Y468X	exonic	ENSMUSG00000027641	NA	stopgain	ENSMUSG00000027641:ENSMUST00000029170:exon11:c.T1404A:p.Y468X	2qH1	NA	NA	-	GTATTTTGTAATACAAAATTT	chr2	157187998	GTAxTAC	A	T	67_S4_L001_R1_001	E210_S1	0	NOVEL	COVERED	0.999956	0.999956	1	1	1	170	0	-13.9541	7.21395	2.54045	6.34031	0.050505	0.02	0.632761
ACR_1	chr2	161524657	161524657	G	C	UTR3	Ptprt	NM_001291151:c.*4859C>G,NM_001291150:c.*4859C>G,NM_021464:c.*4859C>G,NM_001291149:c.*4859C>G	NA	NA	intergenic	Chd6,Ptprt	dist=415601;dist=2966	NA	NA	UTR3	ENSMUSG00000053141	ENSMUST00000109445:c.*4859C>G,ENSMUST00000109443:c.*4859C>G	NA	NA	2qH2	NA	NA	-	GACCTGCTATGATAGCAGGGG	chr2	161524657	TATxATA	G	C	67_S4_L001_R1_001	E210_S1	0	NOVEL	COVERED	0.999726	0.999726	1	1	1	140	0	-6.87579	9.44318	4.19925	4.88792	0.069767	0.02	0.739945
ACR_1	chr2	179976505	179976505	G	C	exonic	Taf4a	NA	nonsynonymous SNV	Taf4a:NM_001081092:exon1:c.C142G:p.P48A	exonic	Taf4a	NA	nonsynonymous SNV	Taf4a:uc008ohw.1:exon1:c.C142G:p.P48A	exonic	ENSMUSG00000039117	NA	nonsynonymous SNV	ENSMUSG00000039117:ENSMUST00000041618:exon1:c.C142G:p.P48A	2qH4	NA	NA	-	CGCAGCTCGGGCGTGCGCGGC	chr2	179976505	CGGxCGT	G	C	67_S4_L001_R1_001	64_Jiri_S1_L001_R1_001	0	NOVEL	COVERED	0.941741	0.941741	1	1	0.999974	85	0	10.4422	14.7941	14.7942	0	0.177778	0.02	-0.410628
ACR_1	chr2	181520682	181520682	G	C	UTR5	Dnajc5	NM_001271585:c.-25700G>C,NM_001271584:c.-25700G>C,NM_016775:c.-25700G>C	NA	NA	UTR5	Dnajc5	uc008omr.2:c.-25700G>C,uc033hrx.1:c.-25700G>C,uc008omp.2:c.-25700G>C	NA	NA	UTR5	ENSMUSG00000000826	ENSMUST00000072334:c.-25700G>C,ENSMUST00000116365:c.-25700G>C,ENSMUST00000108797:c.-25700G>C	NA	NA	2qH4	NA	NA	+	CGGTGGACCGGCGGGCGTGCC	chr2	181520682	CCGxCGG	G	C	67_S4_L001_R1_001	64_Jiri_S1_L001_R1_001	0	NOVEL	COVERED	0.999835	0.999835	1	1	1	204	0	-10.3955	7.39967	8.36919	2.64066	0.066667	0.02	0.713835
ACR_1	chr3	87709661	87709661	C	T	exonic	Arhgef11	NA	nonsynonymous SNV	Arhgef11:NM_001003912:exon14:c.C1238T:p.A413V	exonic	Arhgef11	NA	nonsynonymous SNV	Arhgef11:uc008psn.1:exon8:c.C680T:p.A227V,Arhgef11:uc008psl.1:exon13:c.C1118T:p.A373V,Arhgef11:uc008psm.1:exon14:c.C1238T:p.A413V	exonic	ENSMUSG00000041977	NA	nonsynonymous SNV	ENSMUSG00000041977:ENSMUST00000129113:exon13:c.C1118T:p.A373V,ENSMUSG00000041977:ENSMUST00000039476:exon14:c.C1238T:p.A413V,ENSMUSG00000041977:ENSMUST00000152006:exon14:c.C1238T:p.A413V	3qF1	NA	NA	+	GAGAAAAATGCGGTAAGACCA	chr3	87709661	ATGxGGT	C	T	67_S4_L001_R1_001	64_Jiri_S1_L001_R1_001	0	NOVEL	COVERED	0.999998	0.999998	1	1	1	281	0	13.5935	28.1775	15.9707	14.4711	0.137931	0.02	1.97767
ACR_1	chr3	90455079	90455079	T	C	intronic	Npr1	NA	NA	NA	intronic	Npr1	NA	NA	NA	ncRNA_exonic	ENSMUSG00000087411	NA	NA	NA	3qF1	NA	NA	-	CCGGAGGCCTTCCGTGGTCAG	chr3	90455079	CCTxCCG	T	C	67_S4_L001_R1_001	64_Jiri_S1_L001_R1_001	0	NOVEL	COVERED	0.522089	0.522161	0.999863	0.999863	0.983538	44	0	28.0963	28.1011	4.18289	27.4864	0.521739	0.02	-0.209003
ACR_1	chr4	41394626	41394626	T	A	exonic	Kif24	NA	nonsynonymous SNV	Kif24:NM_024241:exon11:c.A2648T:p.D883V	exonic	Kif24	NA	nonsynonymous SNV	Kif24:uc012dcb.1:exon8:c.A2246T:p.D749V,Kif24:uc008sio.1:exon11:c.A2648T:p.D883V	exonic	ENSMUSG00000028438	NA	nonsynonymous SNV	ENSMUSG00000028438:ENSMUST00000030148:exon8:c.A2246T:p.D749V,ENSMUSG00000028438:ENSMUST00000108055:exon11:c.A2648T:p.D883V	4qA5	NA	NA	-	CACCCAGCTGTCAGCTGGCCG	chr4	41394626	CTGxCAG	T	A	67_S4_L001_R1_001	64_Jiri_S1_L001_R1_001	0	NOVEL	COVERED	0.289872	0.292001	0.992708	0.992708	0	27	0	7.29928	8.20451	3.98514	6.34581	0.25	0.02	-0.148897
ACR_1	chr4	42943520	42943520	A	G	intergenic	N28178,Dnajb5	dist=1913;dist=9574	NA	NA	ncRNA_exonic	AK138412	NA	NA	NA	UTR3	ENSMUSG00000036062	ENSMUST00000107975:c.*3919A>G,ENSMUST00000107976:c.*3919A>G,ENSMUST00000069184:c.*3919A>G	NA	NA	4qA5	NA	NA	NA	GCTGCAGCCAAGACAAAGGAG	chr4	42943520	CCAxGAC	A	G	67_S4_L001_R1_001	70_S7_L001_R1_001	0	NOVEL	COVERED	0.963774	0.963774	1	1	1	119	0	0.453095	8.4397	5.39701	3.05092	0.1	0.02	1.05304
ACR_1	chr4	96761915	96761915	T	C	exonic	Gm12695	NA	synonymous SNV	Gm12695:NM_001081284:exon4:c.A693G:p.L231L	exonic	Gm12695	NA	synonymous SNV	Gm12695:uc008ttm.1:exon4:c.A693G:p.L231L	exonic	ENSMUSG00000078639	NA	synonymous SNV	ENSMUSG00000078639:ENSMUST00000107071:exon4:c.A693G:p.L231L	4qC5	NA	NA	-	TGACTGTTAGTAGTGGCAGAG	chr4	96761915	TAGxAGT	T	C	67_S4_L001_R1_001	64_Jiri_S1_L001_R1_001	0	NOVEL	COVERED	0.989542	0.989542	1	1	1	152	0	32.4905	35.4317	9.46948	27.9402	0.266667	0.02	1.06282
ACR_1	chr4	99658412	99658412	T	C	UTR3	Foxd3	NM_010425:c.*378T>C	NA	NA	UTR3	Foxd3	uc008tuv.1:c.*378T>C	NA	NA	UTR3	ENSMUSG00000067261	ENSMUST00000087285:c.*378T>C	NA	NA	4qC6	NA	NA	+	TTTTTATTTTTTTAAGAAAAT	chr4	99658412	TTTxTTA	T	C	67_S4_L001_R1_001	E210_S1	0	NOVEL	COVERED	1	1	1	1	1	418	0	-30.6655	14.1362	0	15.1092	0.048309	0.02	4.17889
ACR_1	chr4	134525769	134525769	T	A	UTR3	Mtfr1l	NM_029759:c.*638A>T,NM_001256112:c.*638A>T	NA	NA	UTR3	Mtfr1l	uc008vfi.2:c.*638A>T,uc008vfj.2:c.*638A>T	NA	NA	UTR3	ENSMUSG00000046671	ENSMUST00000102550:c.*638A>T,ENSMUST00000116279:c.*638A>T,ENSMUST00000131613:c.*790A>T	NA	NA	4qD3	NA	NA	-	TAGATGGACTTAGTCCATGGA	chr4	134525769	ACTxAGT	T	A	67_S4_L001_R1_001	E210_S1	0	NOVEL	COVERED	0.999487	0.999487	1	1	1	145	0	-9.54873	7.20667	1.18308	5.97466	0.060241	0.02	0.676257
ACR_1	chr4	137681395	137681395	G	C	intronic	Rap1gap	NA	NA	NA	intronic	Rap1gap	NA	NA	NA	UTR5	ENSMUSG00000041351	ENSMUST00000105835:c.-317G>C,ENSMUST00000152567:c.-317G>C,ENSMUST00000150928:c.-317G>C	NA	NA	4qD3	NA	NA	+	GGGCCGCAGGGCCATCAGCCC	chr4	137681395	AGGxCCA	G	C	67_S4_L001_R1_001	64_Jiri_S1_L001_R1_001	0	NOVEL	COVERED	0.888875	0.888875	1	1	0.999998	88	0	1.06732	6.3836	1.21101	5.11217	0.128205	0.02	-0.356489
ACR_1	chr4	149485012	149485012	C	G	intronic	Nmnat1	NA	NA	NA	UTR5	Nmnat1	uc008vwk.1:c.-10470G>C	NA	NA	UTR5	ENSMUSG00000028992	ENSMUST00000105693:c.-10470G>C	NA	NA	4qE2	NA	NA	-	TCTCTAAAGGCCCAGCCATTG	chr4	149485012	AGGxCCA	C	G	67_S4_L001_R1_001	64_Jiri_S1_L001_R1_001	0	NOVEL	COVERED	0.979526	0.979526	1	1	1	151	0	7.3678	14.2557	4.53969	9.7362	0.142857	0.02	1.00905
ACR_1	chr5	25189911	25189911	G	C	exonic	Galntl5	NA	nonsynonymous SNV	Galntl5:NM_026449:exon3:c.G275C:p.G92A	exonic	Galntl5	NA	nonsynonymous SNV	Galntl5:uc008wsr.1:exon3:c.G275C:p.G92A,Galntl5:uc012dtk.1:exon3:c.G176C:p.G59A	exonic	ENSMUSG00000028938	NA	nonsynonymous SNV	ENSMUSG00000028938:ENSMUST00000030778:exon3:c.G275C:p.G92A,ENSMUSG00000028938:ENSMUST00000114965:exon3:c.G176C:p.G59A	5qA3	NA	NA	+	AGAAGACTGGGCATCGAGAGA	chr5	25189911	TGGxCAT	G	C	67_S4_L001_R1_001	64_Jiri_S1_L001_R1_001	0	NOVEL	COVERED	0.835716	0.835716	1	1	0.999997	83	0	7.79264	11.7593	3.53472	8.18128	0.162162	0.02	-0.323032
ACR_1	chr5	29452272	29452272	T	C	downstream	Nom1	NA	NA	NA	downstream	Nom1	NA	NA	NA	UTR3	ENSMUSG00000001569	ENSMUST00000001611:c.*1069T>C	NA	NA	5qB1	NA	NA	+	AGTAGAAAAGTTCTAAATTAG	chr5	29452272	AAGxTCT	T	C	67_S4_L001_R1_001	64_Jiri_S1_L001_R1_001	0	NOVEL	COVERED	0.739671	0.739671	1	1	0.999995	77	0	2.88738	7.27972	1.45055	5.86382	0.125	0.02	-0.280442
ACR_1	chr5	29452278	29452278	A	T	downstream	Nom1	NA	NA	NA	downstream	Nom1	NA	NA	NA	UTR3	ENSMUSG00000001569	ENSMUST00000001611:c.*1075A>T	NA	NA	5qB1	NA	NA	+	AAAGTTCTAAATTAGAGCTTT	chr5	29452278	TAAxTTA	A	T	67_S4_L001_R1_001	64_Jiri_S1_L001_R1_001	0	NOVEL	COVERED	0.739671	0.739671	1	1	0.999995	77	0	2.90928	7.28289	1.45134	5.86607	0.125	0.02	-0.279987
ACR_1	chr5	32991140	32991140	A	T	exonic	Depdc5	NA	nonsynonymous SNV	Depdc5:NM_001170567:exon43:c.A4685T:p.K1562M	exonic	Depdc5	NA	nonsynonymous SNV	Depdc5:uc008xaf.2:exon41:c.A4112T:p.K1371M,Depdc5:uc008xae.2:exon43:c.A4685T:p.K1562M	exonic	ENSMUSG00000037426	NA	nonsynonymous SNV	ENSMUSG00000037426:ENSMUST00000120902:exon41:c.A4619T:p.K1540M,ENSMUSG00000037426:ENSMUST00000119705:exon43:c.A4685T:p.K1562M	5qB1	NA	NA	+	CGGCTGCTGAAGGACTTCACG	chr5	32991140	TGAxGGA	A	T	67_S4_L001_R1_001	64_Jiri_S1_L001_R1_001	0	NOVEL	COVERED	0.552837	0.552887	0.999909	0.999909	0.989678	49	0	34.783	34.9943	16.0777	21.7834	0.6	0.02	-0.218757
ACR_1	chr5	34350828	34350828	G	C	exonic	Rnf4	NA	nonsynonymous SNV	Rnf4:NM_011278:exon7:c.G425C:p.G142A	exonic	Rnf4	NA	nonsynonymous SNV	Rnf4:uc008xcd.1:exon7:c.G425C:p.G142A,Rnf4:uc008xce.1:exon7:c.G425C:p.G142A,Rnf4:uc008xcf.1:exon7:c.G425C:p.G142A	exonic	ENSMUSG00000029110	NA	nonsynonymous SNV	ENSMUSG00000029110:ENSMUST00000030992:exon7:c.G425C:p.G142A,ENSMUSG00000029110:ENSMUST00000182047:exon7:c.G425C:p.G142A,ENSMUSG00000029110:ENSMUST00000182709:exon7:c.G425C:p.G142A	5qB2	NA	NA	+	TGTATGGATGGATACTCTGAG	chr5	34350828	ATGxATA	G	C	67_S4_L001_R1_001	64_Jiri_S1_L001_R1_001	0	NOVEL	COVERED	0.99993	0.99993	1	1	1	186	0	12.0491	24.3921	12.7883	14.9391	0.135417	0.02	0.756253
ACR_1	chr5	34619996	34619996	G	A	intronic	Add1	NA	NA	NA	intronic	Add1	NA	NA	NA	intronic	ENSMUSG00000029106	NA	NA	NA	5qB2	NA	NA	+	GGAAGTTATAGCTTCCATTCT	chr5	34619996	ATAxCTT	G	A	67_S4_L001_R1_001	E210_S1	0	NOVEL	COVERED	0.321303	0.322807	0.995343	0.995343	0	32	0	7.40565	8.48606	6.48681	1.80428	0.235294	0.02	-0.15699
ACR_1	chr5	73431875	73431875	T	C	exonic	Cwh43	NA	synonymous SNV	Cwh43:NM_181323:exon12:c.T1560C:p.L520L	exonic	Cwh43	NA	synonymous SNV	Cwh43:uc012dxc.1:exon11:c.T1302C:p.L434L,Cwh43:uc008xsx.1:exon12:c.T1560C:p.L520L	exonic	ENSMUSG00000029154	NA	synonymous SNV	ENSMUSG00000029154:ENSMUST00000065543:exon11:c.T1302C:p.L434L,ENSMUSG00000029154:ENSMUST00000031040:exon12:c.T1560C:p.L520L	5qC3.2	NA	NA	+	ATCACCTTCTTCCGTCGCCAG	chr5	73431875	TCTxCCG	T	C	67_S4_L001_R1_001	64_Jiri_S1_L001_R1_001	0	NOVEL	COVERED	0.73967	0.739671	0.999997	0.999997	0.999693	64	0	13.0396	15.3505	11.107	11.2742	0.21875	0.02	-0.279983
ACR_1	chr5	86665029	86665029	A	C	exonic	Tmprss11b	NA	stopgain	Tmprss11b:NM_177024:exon5:c.T407G:p.L136X	exonic	Tmprss11bnl	NA	stopgain	Tmprss11bnl:uc008xxu.1:exon5:c.T407G:p.L136X	exonic	ENSMUSG00000035861	NA	stopgain	ENSMUSG00000035861:ENSMUST00000038448:exon5:c.T407G:p.L136X	5qE1	NA	NA	-	CATCTGACGTAAGATGCTTTC	chr5	86665029	CGTxAGA	A	C	67_S4_L001_R1_001	64_Jiri_S1_L001_R1_001	0	NOVEL	COVERED	0.552881	0.552887	0.999988	0.999988	0.996292	52	0	5.21681	7.94444	6.01644	1.87061	0.16	0.02	-0.218571
ACR_1	chr5	88008391	88008391	A	T	exonic	Smr3a	NA	nonsynonymous SNV	Smr3a:NM_011422:exon3:c.A417T:p.L139F	exonic	Smr3a	NA	nonsynonymous SNV	Smr3a:uc012dxy.1:exon3:c.A417T:p.L139F	exonic	ENSMUSG00000029280	NA	nonsynonymous SNV	ENSMUSG00000029280:ENSMUST00000031211:exon3:c.A417T:p.L139F	5qE1	NA	NA	+	TGTGGGAATTAATAAATTCCC	chr5	88008391	ATTxATA	A	T	67_S4_L001_R1_001	70_S7_L001_R1_001	0	NOVEL	COVERED	0.99911	0.99911	1	1	1	181	0	-5.47925	9.06695	1.29789	7.58615	0.075949	0.02	0.711146
ACR_1	chr5	107908772	107908772	C	T	UTR3	Fam69a,Rpl5	NM_026062:c.*632G>A;NM_016980:c.*776C>T	NA	NA	UTR3	Fam69a,Rpl5	uc008yni.2:c.*632G>A;uc008ynh.2:c.*776C>T	NA	NA	UTR3	ENSMUSG00000029270,ENSMUSG00000058558	ENSMUST00000031198:c.*632G>A;ENSMUST00000082223:c.*776C>T	NA	NA	5qF	NA	NA	NA	CAGTTAACTGCTTACCTACAT	chr5	107908772	CTGxTTA	C	T	67_S4_L001_R1_001	E210_S1	0	NOVEL	COVERED	0.999962	0.999962	1	1	0.999995	145	0	7.75926	21.3405	14.1844	7.07102	0.122449	0.02	0.625897
ACR_1	chr5	114319815	114319815	C	G	exonic	Myo1h	NA	nonsynonymous SNV	Myo1h:NM_001164573:exon3:c.C386G:p.T129R	exonic	Myo1h	NA	nonsynonymous SNV	Myo1h:uc012ebt.1:exon3:c.C386G:p.T129R	exonic	ENSMUSG00000066952	NA	nonsynonymous SNV	ENSMUSG00000066952:ENSMUST00000124316:exon3:c.C386G:p.T129R,ENSMUSG00000066952:ENSMUST00000169347:exon3:c.C386G:p.T129R	5qF	NA	NA	+	TGTCCGATGACAGAGTCACTC	chr5	114319815	TGAxAGA	C	G	67_S4_L001_R1_001	64_Jiri_S1_L001_R1_001	0	NOVEL	UNCOVERED	0.099709	0.099721	0.999879	0.999879	0.986224	32	0	12.7745	12.7745	2.0913	10.531	0.5	0.02	-0.087663
ACR_1	chr5	117353881	117353881	A	T	UTR3	Vsig10	NM_001033311:c.*1075A>T	NA	NA	UTR3	Vsig10	uc008zfo.1:c.*1075A>T,uc008zfp.1:c.*1075A>T	NA	NA	UTR3	ENSMUSG00000066894	ENSMUST00000111967:c.*1075A>T,ENSMUST00000147182:c.*1075A>T	NA	NA	5qF	NA	NA	+	CTGCTCAGACAGGACAAGATC	chr5	117353881	GACxGGA	A	T	67_S4_L001_R1_001	64_Jiri_S1_L001_R1_001	0	NOVEL	COVERED	1	1	1	1	1	553	0	45.331	78.8853	18.3146	72.7576	0.14841	0.02	5.26805
ACR_1	chr5	124252511	124252511	T	C	UTR3	Mphosph9	NM_001277867:c.*2506A>G,NM_001081323:c.*2506A>G	NA	NA	UTR3	Mphosph9	uc008zpg.2:c.*2506A>G,uc033imc.1:c.*2506A>G,uc008zph.2:c.*2506A>G	NA	NA	UTR3	ENSMUSG00000038126	ENSMUST00000031344:c.*2506A>G	NA	NA	5qF	NA	NA	-	AGCAGTGCTTTAGCTCTAGCT	chr5	124252511	CTTxAGC	T	C	67_S4_L001_R1_001	64_Jiri_S1_L001_R1_001	0	NOVEL	COVERED	0.967425	0.967425	1	1	0.999994	95	0	12.7809	18.0038	1.58506	16.5372	0.173077	0.02	1.04477
ACR_1	chr5	125429767	125429767	G	A	exonic	Dhx37	NA	nonsynonymous SNV	Dhx37:NM_203319:exon4:c.C664T:p.P222S	exonic	Dhx37	NA	nonsynonymous SNV	Dhx37:uc008zrq.1:exon4:c.C664T:p.P222S	exonic	ENSMUSG00000029480	NA	nonsynonymous SNV	ENSMUSG00000029480:ENSMUST00000169485:exon4:c.C664T:p.P222S	5qG1.1	NA	NA	-	GGTGGAGGCGGGGCAGAGGCT	chr5	125429767	GCGxGGC	G	A	67_S4_L001_R1_001	64_Jiri_S1_L001_R1_001	0	NOVEL	COVERED	0.457697	0.457757	0.999869	0.999869	0.984784	43	0	9.26501	10.7668	5.98027	11.9229	0.227273	0.02	-0.192896
ACR_1	chr5	130282081	130282081	T	A	UTR3	Tyw1	NM_178897:c.*5T>A	NA	NA	UTR3	Tyw1	uc012eeb.1:c.*5T>A	NA	NA	UTR3	ENSMUSG00000056310	ENSMUST00000044204:c.*5T>A	NA	NA	5qG1.3	NA	NA	+	CGTTAGTGTGTCGATAGCTAT	chr5	130282081	GTGxCGA	T	A	67_S4_L001_R1_001	64_Jiri_S1_L001_R1_001	0	NOVEL	COVERED	0.999995	0.999995	1	1	1	196	0	-11.5024	9.99103	2.86777	7.02989	0.06422	0.02	1.8344
ACR_1	chr5	135873268	135873268	G	C	exonic	Srrm3	NA	nonsynonymous SNV	Srrm3:NM_021403:exon15:c.G1907C:p.S636T	exonic	Srrm3	NA	nonsynonymous SNV	Srrm3:uc008zzc.1:exon15:c.G1907C:p.S636T	exonic	ENSMUSG00000039860	NA	nonsynonymous SNV	ENSMUSG00000039860:ENSMUST00000144211:exon15:c.G1907C:p.S636T	5qG2	NA	NA	+	CGCAGTCCTAGCTACCACAGC	chr5	135873268	CTAxCTA	G	C	67_S4_L001_R1_001	64_Jiri_S1_L001_R1_001	0	NOVEL	COVERED	0.818465	0.818465	1	1	0.999998	83	0	13.6827	16.05	9.76721	8.67153	0.228571	0.02	-0.31561
ACR_1	chr5	143925873	143925873	A	T	exonic	Pms2	NA	synonymous SNV	Pms2:NM_008886:exon11:c.A1797T:p.A599A	exonic	Pms2	NA	synonymous SNV	Pms2:uc009akz.1:exon11:c.A1797T:p.A599A,Pms2:uc009ala.1:exon11:c.A1797T:p.A599A,Pms2:uc009alb.1:exon11:c.A1248T:p.A416A,Pms2:uc012egk.1:exon11:c.A1248T:p.A416A	exonic	ENSMUSG00000079109	NA	synonymous SNV	ENSMUSG00000079109:ENSMUST00000148011:exon11:c.A1797T:p.A599A	5qG2	NA	NA	+	GCACCTCAGCAGCTGAGGTCG	chr5	143925873	AGCxGCT	A	T	67_S4_L001_R1_001	E210_S1	0	NOVEL	COVERED	0.934492	0.934492	1	1	0.999995	91	0	-1.10641	6.55963	3.35028	3.03361	0.088889	0.02	-0.394096
ACR_1	chr5	147576220	147576220	T	G	exonic	Flt1	NA	synonymous SNV	Flt1:NM_010228:exon25:c.A3306C:p.G1102G	exonic	Flt1	NA	synonymous SNV	Flt1:uc009aoh.1:exon25:c.A3306C:p.G1102G	exonic	ENSMUSG00000029648	NA	synonymous SNV	ENSMUSG00000029648:ENSMUST00000031653:exon25:c.A3306C:p.G1102G	5qG3	NA	NA	-	CCATTTGCACTCCTGGGTATG	chr5	147576220	CACxCCT	T	G	67_S4_L001_R1_001	64_Jiri_S1_L001_R1_001	0	NOVEL	COVERED	0.739671	0.739671	1	1	0.999994	75	0	13.1903	14.8346	6.82309	7.77319	0.258065	0.02	-0.280264
ACR_1	chr6	23969820	23969820	C	A	exonic	Tas2r118	NA	nonsynonymous SNV	Tas2r118:NM_207022:exon1:c.G241T:p.V81L	exonic	Tas2r118	NA	nonsynonymous SNV	Tas2r118:uc009bbn.1:exon1:c.G241T:p.V81L	exonic	ENSMUSG00000043865	NA	nonsynonymous SNV	ENSMUSG00000043865:ENSMUST00000062463:exon1:c.G241T:p.V81L	6qA3.1	NA	NA	-	ACGACTGATACCTTCCAAAAT	chr6	23969820	ATAxCTT	C	A	67_S4_L001_R1_001	64_Jiri_S1_L001_R1_001	0	NOVEL	COVERED	0.996724	0.996724	1	1	1	147	0	64.3342	64.9287	16.1033	50.9854	0.4	0.02	0.985051
ACR_1	chr6	85472620	85472620	C	A	UTR3	Fbxo41	NM_001289674:c.*406G>T,NM_001289675:c.*406G>T,NM_001001160:c.*406G>T	NA	NA	UTR3	Fbxo41	uc009cpw.2:c.*406G>T,uc009cpx.2:c.*406G>T,uc033isv.1:c.*406G>T	NA	NA	UTR3	ENSMUSG00000047013	ENSMUST00000159062:c.*406G>T,ENSMUST00000161078:c.*406G>T,ENSMUST00000161546:c.*406G>T	NA	NA	6qC3	NA	NA	-	GAGAAGAGTCCTCCTTGCCAC	chr6	85472620	GTCxTCC	C	A	67_S4_L001_R1_001	64_Jiri_S1_L001_R1_001	0	NOVEL	COVERED	0.95449	0.954491	0.999999	0.999999	0.999806	84	0	-2.21657	6.41528	5.20816	5.00668	0.081633	0.02	-0.427191
ACR_1	chr6	114707708	114707708	A	C	intronic	Atg7	NA	NA	NA	intronic	Atg7	NA	NA	NA	intronic	ENSMUSG00000030314	NA	NA	NA	6qE3	NA	NA	+	AGGAGATGTAAGTCGGGCTCT	chr6	114707708	GTAxGTC	A	C	67_S4_L001_R1_001	64_Jiri_S1_L001_R1_001	0	NOVEL	COVERED	0.996724	0.996724	1	1	1	135	0	26.2979	29.8933	10.9256	18.9223	0.26087	0.02	0.694248
ACR_1	chr6	129517390	129517390	C	G	exonic	Tmem52b	NA	nonsynonymous SNV	Tmem52b:NM_001081186:exon5:c.C556G:p.H186D	exonic	Tmem52b	NA	nonsynonymous SNV	Tmem52b:uc009efx.1:exon5:c.C556G:p.H186D	exonic	ENSMUSG00000030160	NA	nonsynonymous SNV	ENSMUSG00000030160:ENSMUST00000032263:exon5:c.C556G:p.H186D	6qF3	NA	NA	+	ACCCCCATCACACTGATGGGG	chr6	129517390	TCAxACT	C	G	67_S4_L001_R1_001	64_Jiri_S1_L001_R1_001	0	NOVEL	COVERED	0.58293	0.58293	0.999999	0.999999	0.999855	62	0	3.78628	6.76781	0	7.36458	0.153846	0.02	-0.227894
ACR_1	chr6	129517391	129517391	A	T	exonic	Tmem52b	NA	nonsynonymous SNV	Tmem52b:NM_001081186:exon5:c.A557T:p.H186L	exonic	Tmem52b	NA	nonsynonymous SNV	Tmem52b:uc009efx.1:exon5:c.A557T:p.H186L	exonic	ENSMUSG00000030160	NA	nonsynonymous SNV	ENSMUSG00000030160:ENSMUST00000032263:exon5:c.A557T:p.H186L	6qF3	NA	NA	+	CCCCCATCACACTGATGGGGG	chr6	129517391	CACxCTG	A	T	67_S4_L001_R1_001	64_Jiri_S1_L001_R1_001	0	NOVEL	COVERED	0.58293	0.58293	0.999999	0.999999	0.999855	62	0	4.28718	7.26641	0	7.86459	0.153846	0.02	-0.227909
ACR_1	chr6	131228165	131228165	C	A	intronic	Klra2	NA	NA	NA	intronic	Klra2	NA	NA	NA	intronic	ENSMUSG00000030187	NA	NA	NA	6qF3	NA	NA	-	CCTCTCAATTCCTGTACCAGT	chr6	131228165	ATTxCTG	C	A	67_S4_L001_R1_001	64_Jiri_S1_L001_R1_001	0	NOVEL	UNCOVERED	0.05402	0.054137	0.997832	0.997832	0	24	0	10.0142	10.0142	4.80287	5.32358	0.5	0.02	-0.069817
ACR_1	chr6	146777232	146777232	G	C	UTR3	Stk38l	NM_172734:c.*1511G>C	NA	NA	UTR3	Stk38l	uc009esh.2:c.*1511G>C,uc009esi.2:c.*1511G>C	NA	NA	UTR3	ENSMUSG00000001630	ENSMUST00000001675:c.*1511G>C	NA	NA	6qG3	NA	NA	+	CAAGTATTTGGAGAAAGCACT	chr6	146777232	TTGxAGA	G	C	67_S4_L001_R1_001	64_Jiri_S1_L001_R1_001	0	NOVEL	COVERED	0.97082	0.97082	1	1	1	113	0	12.6874	17.2621	15.8402	3.45203	0.183673	0.02	1.03617
ACR_1	chr7	4135564	4135564	T	G	ncRNA_intronic	D030047H15Rik	NA	NA	NA	ncRNA_intronic	D030047H15Rik	NA	NA	NA	ncRNA_intronic	ENSMUSG00000085886	NA	NA	NA	7qA1	NA	NA	-	TATCCCTGGTTCTTGCACAAT	chr7	4135564	GGTxCTT	T	G	67_S4_L001_R1_001	E210_S1	0	NOVEL	COVERED	0.94174	0.941741	0.999999	0.999999	0.999806	82	0	-0.791985	6.58942	3.54742	2.91253	0.106383	0.02	-0.411316
ACR_1	chr7	19086568	19086568	A	T	exonic	Dmpk	NA	nonsynonymous SNV	Dmpk:NM_001190490:exon4:c.A416T:p.Q139L,Dmpk:NM_001190491:exon4:c.A416T:p.Q139L,Dmpk:NM_032418:exon4:c.A416T:p.Q139L	exonic	Dmpk	NA	nonsynonymous SNV	Dmpk:uc009fkn.2:exon4:c.A416T:p.Q139L,Dmpk:uc009fko.2:exon4:c.A416T:p.Q139L,Dmpk:uc009fkp.2:exon4:c.A416T:p.Q139L	exonic	ENSMUSG00000030409	NA	nonsynonymous SNV	ENSMUSG00000030409:ENSMUST00000122999:exon3:c.A332T:p.Q111L,ENSMUSG00000030409:ENSMUST00000032568:exon4:c.A416T:p.Q139L,ENSMUSG00000030409:ENSMUST00000108473:exon4:c.A416T:p.Q139L,ENSMUSG00000030409:ENSMUST00000108474:exon4:c.A416T:p.Q139L,ENSMUSG00000030409:ENSMUST00000154199:exon4:c.A416T:p.Q139L	7qA3	NA	NA	+	TTTGCCTTCCAGGATGAGAAC	chr7	19086568	TCCxGGA	A	T	67_S4_L001_R1_001	64_Jiri_S1_L001_R1_001	0	NOVEL	COVERED	0.292001	0.292001	1	1	0.999994	60	0	7.90351	8.80562	6.98322	8.20632	0.25	0.02	-0.148593
ACR_1	chr7	19904288	19904288	G	T	UTR3	Pvr	NM_027514:c.*839C>A	NA	NA	UTR3	Pvr	uc009fno.2:c.*839C>A	NA	NA	UTR3	ENSMUSG00000040511	ENSMUST00000043517:c.*839C>A	NA	NA	7qA3	NA	NA	-	TTTTTTTTTTGTGGTTCACAC	chr7	19904288	TTTxTGG	G	T	67_S4_L001_R1_001	E210_S1	0	NOVEL	COVERED	0.995684	0.995687	0.999998	0.999998	0.999725	101	0	-0.076459	8.54842	9.31937	0	0.136364	0.02	0.814228
ACR_1	chr7	25328609	25328609	G	C	exonic	Megf8	NA	nonsynonymous SNV	Megf8:NM_001160400:exon4:c.G683C:p.R228P	exonic	Megf8	NA	nonsynonymous SNV	Megf8:uc009fsj.2:exon4:c.G683C:p.R228P	exonic	ENSMUSG00000045039	NA	nonsynonymous SNV	ENSMUSG00000045039:ENSMUST00000128119:exon4:c.G683C:p.R228P	7qA3	NA	NA	+	TTCTCTGCCCGAATTGGGGCA	chr7	25328609	CCCxAAT	G	C	67_S4_L001_R1_001	70_S7_L001_R1_001	0	NOVEL	COVERED	0.800245	0.800245	1	1	1	89	0	8.15118	11.6306	7.51118	9.28382	0.171429	0.02	-0.304268
ACR_1	chr7	56103818	56103818	T	G	exonic	Herc2	NA	nonsynonymous SNV	Herc2:NM_010418:exon15:c.T1964G:p.L655R	exonic	Herc2	NA	nonsynonymous SNV	Herc2:uc009hdw.1:exon14:c.T1964G:p.L655R,Herc2:uc009hdv.1:exon15:c.T1964G:p.L655R	exonic	ENSMUSG00000030451	NA	nonsynonymous SNV	ENSMUSG00000030451:ENSMUST00000076226:exon15:c.T1964G:p.L655R,ENSMUSG00000030451:ENSMUST00000164095:exon15:c.T1964G:p.L655R	7qB5	NA	NA	+	ATTGAAAAACTTCAAGACTTA	chr7	56103818	AACxTCA	T	G	67_S4_L001_R1_001	64_Jiri_S1_L001_R1_001	0	NOVEL	COVERED	0.851984	0.851984	1	1	1	89	0	4.57884	8.6961	0.869903	8.07166	0.162162	0.02	-0.332594
ACR_1	chr7	88308165	88308165	C	A	intronic	Ctsc	NA	NA	NA	intronic	Ctsc	NA	NA	NA	intronic	ENSMUSG00000030560	NA	NA	NA	7qD3	NA	NA	+	TATTTCAGAGCTGTATTATGA	chr7	88308165	GAGxTGT	C	A	67_S4_L001_R1_001	64_Jiri_S1_L001_R1_001	0	NOVEL	COVERED	0.998696	0.998696	1	1	1	193	0	-5.99046	7.85761	0	7.99674	0.078947	0.02	0.834566
ACR_1	chr7	99898604	99898604	G	A	intronic	Xrra1	NA	NA	NA	intronic	Xrra1	NA	NA	NA	intronic	ENSMUSG00000035211	NA	NA	NA	7qE2	NA	NA	+	TATGGCCCTTGCTCCACTGTG	chr7	99898604	CTTxCTC	G	A	67_S4_L001_R1_001	64_Jiri_S1_L001_R1_001	0	NOVEL	COVERED	0.739671	0.739671	1	1	0.999994	76	0	2.60528	6.98329	0	7.16263	0.125	0.02	-0.280053
ACR_1	chr7	141334087	141334087	A	T	exonic	Tmem80	NA	synonymous SNV	Tmem80:NM_001141950:exon5:c.A150T:p.V50V,Tmem80:NM_027797:exon5:c.A150T:p.V50V	exonic	Tmem80	NA	synonymous SNV	Tmem80:uc009kkq.2:exon5:c.A150T:p.V50V,Tmem80:uc009kkr.2:exon5:c.A150T:p.V50V	exonic	ENSMUSG00000025505	NA	synonymous SNV	ENSMUSG00000025505:ENSMUST00000132061:exon2:c.A150T:p.V50V,ENSMUSG00000025505:ENSMUST00000126510:exon4:c.A150T:p.V50V,ENSMUSG00000025505:ENSMUST00000026578:exon5:c.A150T:p.V50V,ENSMUSG00000025505:ENSMUST00000133012:exon5:c.A150T:p.V50V	7qF5	NA	NA	+	TTCTCAAAGTAGCTCAGCTCT	chr7	141334087	AGTxGCT	A	T	67_S4_L001_R1_001	64_Jiri_S1_L001_R1_001	0	NOVEL	COVERED	0.423477	0.423478	0.999998	0.999998	0.999725	54	0	15.4186	15.9349	2.00603	19.3442	0.333333	0.02	-0.184097
ACR_1	chr7	143017455	143017455	G	C	intronic	Tspan32	NA	NA	NA	intronic	Tspan32	NA	NA	NA	intronic	ENSMUSG00000000244	NA	NA	NA	7qF5	NA	NA	+	CCAGGGAGGCGGCCCAGTGGC	chr7	143017455	GGCxGCC	G	C	67_S4_L001_R1_001	64_Jiri_S1_L001_R1_001	0	NOVEL	COVERED	0.800245	0.800245	1	1	0.999993	77	0	3.14282	7.5029	8.69024	0	0.142857	0.02	-0.306175
ACR_1	chr7	144589227	144589227	C	A	UTR3	Ano1	NM_001242349:c.*772G>T,NM_178642:c.*772G>T	NA	NA	UTR3	Ano1	uc009kqn.2:c.*772G>T,uc009kqm.2:c.*772G>T	NA	NA	UTR3	ENSMUSG00000031075	ENSMUST00000121758:c.*772G>T,ENSMUST00000118556:c.*772G>T,ENSMUST00000033393:c.*772G>T	NA	NA	7qF5	NA	NA	-	GTTTAAAAAGCAAAAAAAAAT	chr7	144589227	AAGxAAA	C	A	67_S4_L001_R1_001	E210_S1	0	NOVEL	COVERED	1	1	1	1	1	260	0	-15.5482	8.16311	0	9.37595	0.066116	0.02	1.68365
ACR_1	chr8	45031592	45031592	A	T	exonic	Fat1	NA	nonsynonymous SNV	Fat1:NM_001081286:exon13:c.A9797T:p.E3266V	exonic	Fat1	NA	nonsynonymous SNV	Fat1:uc009lon.2:exon13:c.A9797T:p.E3266V	exonic	ENSMUSG00000070047	NA	nonsynonymous SNV	ENSMUSG00000070047:ENSMUST00000098796:exon13:c.A9797T:p.E3266V	8qB1.1	NA	NA	+	GCCAACGCGGAAATCACCTAC	chr8	45031592	CGGxAAT	A	T	67_S4_L001_R1_001	64_Jiri_S1_L001_R1_001	0	NOVEL	COVERED	0.959859	0.959859	1	1	1	126	0	59.0187	59.0341	31.2955	41.0809	0.48	0.02	-0.437754
ACR_1	chr8	69073643	69073643	T	A	exonic	Slc18a1	NA	nonsynonymous SNV	Slc18a1:NM_153054:exon4:c.A392T:p.E131V	exonic	Slc18a1	NA	nonsynonymous SNV	Slc18a1:uc009lwv.1:exon2:c.A392T:p.E131V,Slc18a1:uc009lwu.1:exon3:c.A392T:p.E131V,Slc18a1:uc009lwt.1:exon4:c.A392T:p.E131V	exonic	ENSMUSG00000036330	NA	nonsynonymous SNV	ENSMUSG00000036330:ENSMUST00000037478:exon4:c.A392T:p.E131V	8qB3.3	NA	NA	-	GACATTTTCTTCTTCCAAGAA	chr8	69073643	TCTxCTT	T	A	67_S4_L001_R1_001	64_Jiri_S1_L001_R1_001	0	NOVEL	COVERED	0.976865	0.976865	1	1	1	133	0	10.9607	16.8626	9.36893	7.26873	0.163636	0.02	1.01814
ACR_1	chr8	83313455	83313455	G	T	UTR3	Elmod2	NM_001170691:c.*2861C>A,NM_178736:c.*2861C>A	NA	NA	UTR3	Elmod2	uc009mjy.1:c.*2861C>A,uc009mka.2:c.*2861C>A,uc009mjz.2:c.*2861C>A	NA	NA	UTR3	ENSMUSG00000035151	ENSMUST00000177594:c.*2861C>A,ENSMUST00000053902:c.*2861C>A	NA	NA	8qC2	NA	NA	-	CACCTGTGCTGGGGATGCAGC	chr8	83313455	GCTxGGG	G	T	67_S4_L001_R1_001	64_Jiri_S1_L001_R1_001	0	NOVEL	COVERED	0.999992	0.999992	1	1	1	233	0	45.0801	51.993	38.9676	12.8314	0.233645	0.02	2.04598
ACR_1	chr8	85937045	85937045	T	A	intronic	Phkb	NA	NA	NA	intronic	Phkb	NA	NA	NA	UTR3	ENSMUSG00000036879	ENSMUST00000160611:c.*1353T>A	NA	NA	8qC3	NA	NA	+	AAAGCATACATGAAAAAGTAA	chr8	85937045	ACAxGAA	T	A	67_S4_L001_R1_001	E210_S1	0	NOVEL	COVERED	0.999881	0.999881	1	1	1	155	0	-1.9178	6.84915	3.99052	4.42149	0.150685	0.02	-0.263275
ACR_1	chr8	111721113	111721113	G	A	exonic	Bcar1	NA	synonymous SNV	Bcar1:NM_001198839:exon2:c.C231T:p.G77G,Bcar1:NM_009954:exon2:c.C231T:p.G77G	exonic	Bcar1	NA	synonymous SNV	Bcar1:uc009nmt.2:exon2:c.C231T:p.G77G,Bcar1:uc009nmu.2:exon2:c.C231T:p.G77G,Bcar1:uc009nmw.2:exon2:c.C231T:p.G77G	exonic	ENSMUSG00000031955	NA	synonymous SNV	ENSMUSG00000031955:ENSMUST00000166232:exon2:c.C231T:p.G77G	8qE1	NA	NA	-	TGGCAGGTGGGCCTGGTCCAG	chr8	111721113	TGGxCCT	G	A	67_S4_L001_R1_001	64_Jiri_S1_L001_R1_001	0	NOVEL	COVERED	0.851984	0.851984	1	1	0.999994	81	0	1.89405	6.93023	0	7.71229	0.114286	0.02	-0.330684
ACR_1	chr8	122481964	122481964	T	A	UTR3	Ctu2,Piezo1	NM_153775:c.*308T>A;NM_001037298:c.*18A>T	NA	NA	UTR3	Ctu2,Piezo1	uc009nsz.2:c.*308T>A;uc009ntb.2:c.*18A>T,uc012gme.1:c.*18A>T,uc012gmf.1:c.*18A>T	NA	NA	UTR3	ENSMUSG00000014444,ENSMUSG00000049482	ENSMUST00000067252:c.*18A>T,ENSMUST00000156333:c.*18A>T;ENSMUST00000116412:c.*308T>A,ENSMUST00000151855:c.*573T>A	NA	NA	8qE1	NA	NA	NA	TCATTCCCGGTGCCCAGGGCC	chr8	122481964	CGGxGCC	T	A	67_S4_L001_R1_001	64_Jiri_S1_L001_R1_001	0	NOVEL	COVERED	0.552887	0.552887	1	1	0.999992	64	0	4.58988	7.34149	3.41045	3.68395	0.16	0.02	-0.219078
ACR_1	chr8	123389675	123389675	G	A	exonic	Tcf25	NA	nonsynonymous SNV	Tcf25:NM_001286362:exon6:c.G633A:p.M211I,Tcf25:NM_001286363:exon6:c.G633A:p.M211I,Tcf25:NM_001037877:exon7:c.G708A:p.M236I,Tcf25:NM_001037878:exon7:c.G708A:p.M236I,Tcf25:NM_025804:exon7:c.G708A:p.M236I	exonic	Tcf25	NA	nonsynonymous SNV	Tcf25:uc009nvo.2:exon6:c.G633A:p.M211I,Tcf25:uc012gmr.2:exon6:c.G633A:p.M211I,Tcf25:uc009nvl.2:exon7:c.G708A:p.M236I,Tcf25:uc009nvm.2:exon7:c.G708A:p.M236I,Tcf25:uc009nvn.2:exon7:c.G708A:p.M236I,Tcf25:uc009nvp.2:exon7:c.G708A:p.M236I	exonic	ENSMUSG00000001472	NA	nonsynonymous SNV	ENSMUSG00000001472:ENSMUST00000057934:exon7:c.G708A:p.M236I,ENSMUSG00000001472:ENSMUST00000108840:exon7:c.G708A:p.M236I	8qE1	NA	NA	+	GTCTATCAATGCGGCTGCTGG	chr8	123389675	AATxCGG	G	A	67_S4_L001_R1_001	64_Jiri_S1_L001_R1_001	0	NOVEL	COVERED	0.668523	0.668523	1	1	0.999974	67	0	9.62179	11.8693	7.97101	3.90362	0.206897	0.02	-0.252375
ACR_1	chr8	123411608	123411608	G	A	exonic	Tubb3	NA	nonsynonymous SNV	Tubb3:NM_023279:exon1:c.G3A:p.M1I	exonic	Tubb3	NA	nonsynonymous SNV	Tubb3:uc009nvt.1:exon1:c.G3A:p.M1I	exonic	ENSMUSG00000062380	NA	nonsynonymous SNV	ENSMUSG00000062380:ENSMUST00000071134:exon1:c.G3A:p.M1I	8qE1	NA	NA	+	AAGTCAGCATGAGGGAGATCG	chr8	123411608	CATxAGG	G	A	67_S4_L001_R1_001	64_Jiri_S1_L001_R1_001	0	NOVEL	UNCOVERED	0.12036	0.120436	0.999366	0.999366	0	28	0	6.02106	6.53294	1.87176	7.03353	0.272727	0.02	-0.09643
ACR_1	chr8	124878668	124878668	C	A	intronic	Gnpat	NA	NA	NA	intronic	Gnpat	NA	NA	NA	intronic	ENSMUSG00000031985	NA	NA	NA	8qE2	NA	NA	+	CACCACTGTACGTGAGGATGG	chr8	124878668	GTAxGTG	C	A	67_S4_L001_R1_001	64_Jiri_S1_L001_R1_001	0	NOVEL	COVERED	0.993703	0.993703	1	1	1	132	0	33.7167	37.0179	24.4833	17.7776	0.261538	0.02	1.02889
ACR_1	chr9	36719706	36719706	A	G	intronic	Chek1	NA	NA	NA	intronic	Chek1	NA	NA	NA	intronic	ENSMUSG00000032113	NA	NA	NA	9qA4	NA	NA	-	AACCAAAAGAAAAAGAGACAA	chr9	36719706	AGAxAAA	A	G	67_S4_L001_R1_001	64_Jiri_S1_L001_R1_001	0	NOVEL	COVERED	1	1	1	1	1	277	0	11.9486	29.7602	9.23007	31.0107	0.124031	0.02	2.03809
ACR_1	chr9	44790690	44790690	T	C	UTR3	Ift46	NM_023831:c.*110T>C	NA	NA	UTR3	Ift46	uc009pek.1:c.*110T>C	NA	NA	UTR3	ENSMUSG00000002031	ENSMUST00000002099:c.*110T>C,ENSMUST00000118186:c.*110T>C	NA	NA	9qA5.2	NA	NA	+	CCCTGCTGCCTTGTCCTCGAG	chr9	44790690	GCCxTGT	T	C	67_S4_L001_R1_001	70_S7_L001_R1_001	0	NOVEL	COVERED	0.999317	0.999317	1	1	1	189	0	-3.13888	10.2425	0	11.3122	0.089744	0.02	0.799687
ACR_1	chr9	48326471	48326471	G	T	exonic	Nxpe2	NA	synonymous SNV	Nxpe2:NM_030069:exon3:c.C483A:p.G161G	exonic	Nxpe2	NA	synonymous SNV	Nxpe2:uc009phw.2:exon3:c.C483A:p.G161G	exonic	ENSMUSG00000032028	NA	synonymous SNV	ENSMUSG00000032028:ENSMUST00000034527:exon3:c.C483A:p.G161G,ENSMUSG00000032028:ENSMUST00000137976:exon3:c.C483A:p.G161G	9qA5.3	NA	NA	-	TTCCAGAAGCGCCTGCCTTCA	chr9	48326471	AGCxCCT	G	T	67_S4_L001_R1_001	70_S7_L001_R1_001	0	NOVEL	COVERED	0.717315	0.717315	1	1	1	81	0	7.42466	7.53369	8.02599	7.76848	0.375	0.02	-0.271745
ACR_1	chr9	54897610	54897610	T	G	exonic	Ireb2	NA	nonsynonymous SNV	Ireb2:NM_022655:exon13:c.T1697G:p.L566R	exonic	Ireb2	NA	nonsynonymous SNV	Ireb2:uc009prq.2:exon13:c.T1697G:p.L566R	exonic	ENSMUSG00000032293	NA	nonsynonymous SNV	ENSMUSG00000032293:ENSMUST00000034843:exon13:c.T1697G:p.L566R	9qB	NA	NA	+	CTACCCTATCTTAGCAAGCTA	chr9	54897610	ATCxTAG	T	G	67_S4_L001_R1_001	64_Jiri_S1_L001_R1_001	0	NOVEL	COVERED	0.663892	0.668523	0.993072	0.993072	0	40	0	5.35783	8.305	4.00268	7.17187	0.172414	0.02	-0.254163
ACR_1	chr9	58141198	58141198	A	G	exonic	Stra6	NA	synonymous SNV	Stra6:NM_001162475:exon7:c.A573G:p.K191K,Stra6:NM_001162476:exon7:c.A573G:p.K191K,Stra6:NM_001162479:exon7:c.A573G:p.K191K,Stra6:NM_009291:exon7:c.A573G:p.K191K	exonic	Stra6	NA	synonymous SNV	Stra6:uc009pwi.2:exon7:c.A573G:p.K191K,Stra6:uc009pwj.2:exon7:c.A573G:p.K191K,Stra6:uc012guc.1:exon7:c.A573G:p.K191K,Stra6:uc012gud.1:exon7:c.A573G:p.K191K	exonic	ENSMUSG00000032327	NA	synonymous SNV	ENSMUSG00000032327:ENSMUST00000034880:exon7:c.A573G:p.K191K,ENSMUSG00000032327:ENSMUST00000085677:exon7:c.A573G:p.K191K,ENSMUSG00000032327:ENSMUST00000167479:exon7:c.A573G:p.K191K,ENSMUSG00000032327:ENSMUST00000170397:exon7:c.A573G:p.K191K,ENSMUSG00000032327:ENSMUST00000136154:exon8:c.A573G:p.K191K	9qB	NA	NA	+	TCTGGCAGAAAGCTGAGTGTC	chr9	58141198	GAAxGCT	A	G	67_S4_L001_R1_001	64_Jiri_S1_L001_R1_001	0	NOVEL	COVERED	0.877708	0.877708	1	1	1	90	0	4.4651	9.70731	11.3105	2.93397	0.128205	0.02	-0.350467
ACR_1	chr9	75222148	75222148	A	T	UTR3	Myo5a	NM_010864:c.*4155A>T	NA	NA	UTR3	Myo5a	uc009qrr.1:c.*4155A>T,uc033jlm.1:c.*4155A>T,uc009qrs.1:c.*4155A>T	NA	NA	UTR3	ENSMUSG00000034593	ENSMUST00000123128:c.*4155A>T	NA	NA	9qD	NA	NA	+	GCTTGAGGCCACAAGCATTCT	chr9	75222148	GCCxCAA	A	T	67_S4_L001_R1_001	70_S7_L001_R1_001	0	NOVEL	COVERED	0.994422	0.994422	1	1	1	133	0	-3.44821	7.91875	8.10454	0	0.079365	0.02	0.930667
ACR_1	chr9	107526433	107526433	A	G	intronic	Cacna2d2	NA	NA	NA	intronic	Cacna2d2	NA	NA	NA	intronic	ENSMUSG00000010066	NA	NA	NA	9qF1	NA	NA	+	GGAGGTCTGTAAGGCACTGAC	chr9	107526433	TGTxAGG	A	G	67_S4_L001_R1_001	64_Jiri_S1_L001_R1_001	0	NOVEL	COVERED	0.58293	0.58293	1	1	1	77	0	4.31676	7.27363	2.0314	4.91801	0.153846	0.02	-0.227255
ACR_1	chr10	22704747	22704747	T	A	UTR3	Tbpl1	NM_011603:c.*1069A>T	NA	NA	UTR3	Tbpl1	uc007epp.2:c.*1069A>T,uc007epq.2:c.*1069A>T	NA	NA	UTR3	ENSMUSG00000071359	ENSMUST00000127698:c.*1069A>T	NA	NA	10qA3	NA	NA	-	AGTTTAAGAGTGGCCTCTCTT	chr10	22704747	GAGxGGC	T	A	67_S4_L001_R1_001	70_S7_L001_R1_001	0	NOVEL	COVERED	0.995687	0.995687	1	1	1	163	0	1.50249	12.1672	2.87456	9.23562	0.102941	0.02	0.904188
ACR_1	chr10	49578119	49578119	T	C	intronic	Grik2	NA	NA	NA	intronic	Grik2	NA	NA	NA	intronic	ENSMUSG00000056073	NA	NA	NA	10qB3	NA	NA	-	AATCATACTATATAGCTATTA	chr10	49578119	CTAxATA	T	C	67_S4_L001_R1_001	64_Jiri_S1_L001_R1_001	0	NOVEL	COVERED	0.78106	0.78106	1	1	0.999997	80	0	21.1378	22.4274	7.1666	22.1643	0.294118	0.02	-0.29808
ACR_1	chr10	62598503	62598503	G	A	exonic	Ddx21	NA	nonsynonymous SNV	Ddx21:NM_019553:exon2:c.C476T:p.A159V	exonic	Ddx21	NA	nonsynonymous SNV	Ddx21:uc007fhn.1:exon2:c.C476T:p.A159V	exonic	ENSMUSG00000020075	NA	nonsynonymous SNV	ENSMUSG00000020075:ENSMUST00000045866:exon2:c.C476T:p.A159V	10qB4	NA	NA	-	AGGAATGTCTGCCTCTTCTTC	chr10	62598503	TCTxCCT	G	A	67_S4_L001_R1_001	64_Jiri_S1_L001_R1_001	0	NOVEL	COVERED	0.934492	0.934492	1	1	1	102	0	0.778166	7.49437	10.9544	0	0.111111	0.02	-0.393766
ACR_1	chr10	63928628	63928628	G	A	UTR3	Lrrtm3	NM_178678:c.*1430C>T	NA	NA	UTR3	Lrrtm3	uc007fkk.1:c.*1430C>T	NA	NA	UTR3	ENSMUSG00000042846	ENSMUST00000105439:c.*1430C>T	NA	NA	10qB4	NA	NA	-	TCATTTTAGGGGCAGAAAGAA	chr10	63928628	AGGxGCA	G	A	67_S4_L001_R1_001	64_Jiri_S1_L001_R1_001	0	NOVEL	COVERED	1	1	1	1	1	350	0	62.0604	72.1384	14.4677	57.4338	0.230263	0.02	3.45369
ACR_1	chr10	77900499	77900499	G	C	UTR3	Lrrc3	NM_145152:c.*328C>G	NA	NA	UTR3	Lrrc3	uc007fwi.3:c.*328C>G	NA	NA	UTR3	ENSMUSG00000051652	ENSMUST00000057608:c.*328C>G	NA	NA	10qC1	NA	NA	-	ACTTCCCACAGCATGGTGTGG	chr10	77900499	ACAxCAT	G	C	67_S4_L001_R1_001	70_S7_L001_R1_001	0	NOVEL	COVERED	0.877708	0.877708	1	1	1	92	0	0.319227	6.67696	0	8.40235	0.1	0.02	-0.34978
ACR_1	chr10	78583868	78583868	C	T	intronic	Ilvbl	NA	NA	NA	UTR3	Ilvbl	uc007fxz.1:c.*280C>T,uc011xhu.1:c.*335C>T	NA	NA	intronic	ENSMUSG00000032763	NA	NA	NA	10qC1	NA	NA	+	TTTTTTTTTTCCCCTAACAGG	chr10	78583868	TTTxCCC	C	T	67_S4_L001_R1_001	E210_S1	0	NOVEL	COVERED	0.490511	0.490544	0.999931	0.999931	0.991692	48	0	8.00959	8.0734	9.44096	0	0.428571	0.02	-0.198312
ACR_1	chr10	102350943	102350943	T	C	UTR5	Mgat4c	NM_001205098:c.-27215T>C,NM_001162368:c.-27215T>C,NM_001162369:c.-27215T>C	NA	NA	UTR5	Mgat4c	uc029rfb.1:c.-27215T>C,uc011xmt.1:c.-27215T>C,uc007gyc.2:c.-27215T>C	NA	NA	UTR5	ENSMUSG00000019888	ENSMUST00000127504:c.-27215T>C,ENSMUST00000156751:c.-27215T>C,ENSMUST00000138522:c.-27215T>C,ENSMUST00000163753:c.-27215T>C,ENSMUST00000138016:c.-27215T>C,ENSMUST00000020039:c.-27215T>C	NA	NA	10qD1	NA	NA	+	AGGGTGACAATAGCTTTTATA	chr10	102350943	CAAxAGC	T	C	67_S4_L001_R1_001	64_Jiri_S1_L001_R1_001	0	NOVEL	COVERED	1	1	1	1	1	294	0	21.3058	38.2715	11.7795	33.0116	0.147887	0.02	1.73119
ACR_1	chr10	115342641	115342641	C	G	exonic	Tmem19	NA	synonymous SNV	Tmem19:NM_133683:exon7:c.G876C:p.V292V	exonic	Tmem19	NA	synonymous SNV	Tmem19:uc007hbc.1:exon6:c.G921C:p.V307V,Tmem19:uc007hba.1:exon7:c.G576C:p.V192V,Tmem19:uc007hbb.2:exon7:c.G876C:p.V292V,Tmem19:uc007hbd.1:exon7:c.G876C:p.V292V	exonic	ENSMUSG00000069520	NA	synonymous SNV	ENSMUSG00000069520:ENSMUST00000092170:exon7:c.G876C:p.V292V	10qD2	NA	NA	-	TCGGGCTACTCACCACCAGGC	chr10	115342641	ACTxACC	C	G	67_S4_L001_R1_001	64_Jiri_S1_L001_R1_001	0	NOVEL	COVERED	0.963774	0.963774	1	1	1	104	0	-0.044771	8.11025	-0.049774	8.89767	0.098039	0.02	1.05529
ACR_1	chr10	123163607	123163607	A	T	exonic	Usp15	NA	synonymous SNV	Usp15:NM_001301628:exon6:c.T669A:p.G223G,Usp15:NM_027604:exon6:c.T669A:p.G223G	exonic	Usp15	NA	synonymous SNV	Usp15:uc007hgr.1:exon5:c.T507A:p.G169G,Usp15:uc007hgn.1:exon6:c.T669A:p.G223G,Usp15:uc007hgo.1:exon6:c.T669A:p.G223G,Usp15:uc007hgq.1:exon6:c.T669A:p.G223G,Usp15:uc007hgs.1:exon6:c.T669A:p.G223G,Usp15:uc007hgt.1:exon6:c.T669A:p.G223G	exonic	ENSMUSG00000020124	NA	synonymous SNV	ENSMUSG00000020124:ENSMUST00000020334:exon6:c.T669A:p.G223G	10qD2	NA	NA	-	GAGTAGAGGGACCCCTGGGCC	chr10	123163607	GGGxCCC	A	T	67_S4_L001_R1_001	64_Jiri_S1_L001_R1_001	0	NOVEL	COVERED	0.322807	0.322807	1	1	0.999992	57	0	9.96808	10.6135	5.48545	8.79416	0.294118	0.02	-0.149027
ACR_1	chr11	5099310	5099310	G	A	UTR5	Rhbdd3	NM_177370:c.-3892G>A,NM_001290491:c.-3892G>A,NM_001290492:c.-3892G>A	NA	NA	upstream	Ewsr1,Rhbdd3	NA	NA	NA	UTR5	ENSMUSG00000034175	ENSMUST00000101610:c.-3892G>A	NA	NA	11qA1	NA	NA	+	GAGCTCCTTGGCGCGAGGCGC	chr11	5099310	TTGxCGC	G	A	67_S4_L001_R1_001	64_Jiri_S1_L001_R1_001	0	NOVEL	COVERED	1	1	1	1	1	463	1	-25.1751	13.8626	2.65696	10.7459	0.057592	0.02	3.84406
ACR_1	chr11	6292156	6292156	A	G	intronic	Ogdh	NA	NA	NA	intronic	Ogdh	NA	NA	NA	UTR5	ENSMUSG00000020456	ENSMUST00000140765:c.-4822A>G	NA	NA	11qA1	NA	NA	+	CCGTGCCCGGACACGGCGCTG	chr11	6292156	CGGxCAC	A	G	67_S4_L001_R1_001	E210_S1	0	NOVEL	COVERED	0.42039	0.423478	0.992708	0.992708	0	31	0	6.49339	8.16538	6.77949	1.58561	0.2	0.02	-0.183938
ACR_1	chr11	6509367	6509367	G	C	exonic	Myo1g	NA	nonsynonymous SNV	Myo1g:NM_178440:exon18:c.C2502G:p.D834E	exonic	Myo1g	NA	nonsynonymous SNV	Myo1g:uc007hyt.2:exon18:c.C2502G:p.D834E	exonic	ENSMUSG00000020437	NA	nonsynonymous SNV	ENSMUSG00000020437:ENSMUST00000003459:exon18:c.C2502G:p.D834E	11qA1	NA	NA	-	GGCAACCCCAGTCCTGCCGCA	chr11	6509367	CCAxTCC	G	C	67_S4_L001_R1_001	70_S7_L001_R1_001	0	NOVEL	UNCOVERED	0.036637	0.036766	0.99649	0.99649	0	21	0	7.72432	7.72432	7.22349	9.52876	0.5	0.02	-0.052608
ACR_1	chr11	21996646	21996646	T	C	exonic	Otx1	NA	nonsynonymous SNV	Otx1:NM_011023:exon5:c.A662G:p.Y221C	exonic	Otx1	NA	nonsynonymous SNV	Otx1:uc007idz.1:exon3:c.A464G:p.Y155C,Otx1:uc007idy.1:exon5:c.A662G:p.Y221C	exonic	ENSMUSG00000005917	NA	nonsynonymous SNV	ENSMUSG00000005917:ENSMUST00000006071:exon5:c.A662G:p.Y221C	11qA3.2	NA	NA	-	GGACATAGGGTAGGAGGCTGC	chr11	21996646	GGGxAGG	T	C	67_S4_L001_R1_001	64_Jiri_S1_L001_R1_001	0	NOVEL	COVERED	0.739671	0.739671	1	1	0.999992	71	0	26.6946	27.1309	19.7681	9.62962	0.375	0.02	-0.279775
ACR_1	chr11	34464853	34464853	A	G	exonic	Dock2	NA	nonsynonymous SNV	Dock2:NM_033374:exon26:c.T2660C:p.L887P	exonic	Dock2	NA	nonsynonymous SNV	Dock2:uc029rle.2:exon4:c.T371C:p.L124P,Dock2:uc033fuj.1:exon26:c.T2660C:p.L887P	exonic	ENSMUSG00000020143	NA	nonsynonymous SNV	ENSMUSG00000020143:ENSMUST00000101364:exon6:c.T521C:p.L174P,ENSMUSG00000020143:ENSMUST00000093193:exon26:c.T2660C:p.L887P,ENSMUSG00000020143:ENSMUST00000101365:exon26:c.T2660C:p.L887P	11qA4	NA	NA	-	GCTGTTGAGAAGTTCCACACA	chr11	34464853	AGAxGTT	A	G	67_S4_L001_R1_001	64_Jiri_S1_L001_R1_001	0	NOVEL	UNCOVERED	0.043759	0.043787	0.999366	0.999366	0	24	0	19.6781	19.6691	9.42854	16.2923	1	0.02	-0.060015
ACR_1	chr11	65053134	65053134	T	C	exonic	Arhgap44	NA	nonsynonymous SNV	Arhgap44:NM_001099288:exon7:c.A547G:p.M183V,Arhgap44:NM_175003:exon7:c.A547G:p.M183V	exonic	Arhgap44	NA	nonsynonymous SNV	Arhgap44:uc007jkt.1:exon2:c.A103G:p.M35V,Arhgap44:uc007jku.1:exon7:c.A547G:p.M183V,Arhgap44:uc007jkv.1:exon7:c.A547G:p.M183V,Arhgap44:uc007jkw.1:exon7:c.A550G:p.M184V	exonic	ENSMUSG00000033389	NA	nonsynonymous SNV	ENSMUSG00000033389:ENSMUST00000047463:exon7:c.A547G:p.M183V,ENSMUSG00000033389:ENSMUST00000093001:exon7:c.A550G:p.M184V,ENSMUSG00000033389:ENSMUST00000093002:exon7:c.A547G:p.M183V	11qB3	NA	NA	-	GCCTCCTCCATCTCCTCCCTG	chr11	65053134	CCAxCTC	T	C	67_S4_L001_R1_001	64_Jiri_S1_L001_R1_001	0	NOVEL	COVERED	0.934492	0.934492	1	1	1	142	0	-1.46018	6.42706	0	7.20572	0.086957	0.02	-0.401874
ACR_1	chr11	86212529	86212529	T	G	UTR3	Ints2	NM_027421:c.*103A>C	NA	NA	ncRNA_intronic	4632419I22Rik	NA	NA	NA	ncRNA_intronic	ENSMUSG00000085208	NA	NA	NA	11qC	NA	NA	-	TCATGCTGAATTGAGTCACTT	chr11	86212529	GAAxTGA	T	G	67_S4_L001_R1_001	E210_S1	0	NOVEL	COVERED	1	1	1	1	1	306	0	-32.8604	9.60908	2.52099	7.08207	0.042328	0.02	2.61693
ACR_1	chr11	98728570	98728570	C	G	intronic	Med24	NA	NA	NA	intronic	Med24	NA	NA	NA	intronic	ENSMUSG00000017210	NA	NA	NA	11qD	NA	NA	-	ACTGTCAGTTCTCCAGGTGTT	chr11	98728570	GTTxTCC	C	G	67_S4_L001_R1_001	E210_S1	0	NOVEL	COVERED	1	1	1	1	1	403	0	-30.4972	9.3277	10.7277	0	0.04	0.02	2.94243
ACR_1	chr11	101120826	101120826	G	C	intronic	Tubg1	NA	NA	NA	intronic	Tubg1	NA	NA	NA	intronic	ENSMUSG00000035198	NA	NA	NA	11qD	NA	NA	+	GCTTCCCTCTGACAGGCAGAT	chr11	101120826	TCTxACA	G	C	67_S4_L001_R1_001	64_Jiri_S1_L001_R1_001	0	NOVEL	COVERED	0.888875	0.888875	1	1	1	107	1	23.2073	24.8416	4.12606	19.9389	0.292683	0.02	-0.358454
ACR_1	chr11	104721131	104721131	C	A	intergenic	Itgb3,Efcab3	dist=50660;dist=371088	NA	NA	intergenic	Itgb3,Efcab3	dist=50660;dist=345704	NA	NA	exonic	ENSMUSG00000040838	NA	nonsynonymous SNV	ENSMUSG00000040838:ENSMUST00000148007:exon9:c.C1579A:p.R527S	11qE1	NA	NA	NA	ATCGGATAGACGTGATTCAAG	chr11	104721131	AGAxGTG	C	A	67_S4_L001_R1_001	E210_S1	0	NOVEL	COVERED	0.999216	0.999218	0.999998	0.999998	0.999725	115	2	-1.90254	8.29302	6.56861	2.33016	0.128205	0.02	0.717877
ACR_1	chr11	106503703	106503703	G	T	exonic	Tex2	NA	nonsynonymous SNV	Tex2:NM_198292:exon12:c.C3280A:p.P1094T	exonic	Tex2	NA	nonsynonymous SNV	Tex2:uc007lzb.1:exon11:c.C3274A:p.P1092T,Tex2:uc007lzc.1:exon12:c.C3280A:p.P1094T	exonic	ENSMUSG00000040548	NA	nonsynonymous SNV	ENSMUSG00000040548:ENSMUST00000042780:exon12:c.C3280A:p.P1094T	11qE1	NA	NA	-	TCCATGTTTGGCATGACAAAC	chr11	106503703	TTGxCAT	G	T	67_S4_L001_R1_001	64_Jiri_S1_L001_R1_001	0	NOVEL	COVERED	0.291969	0.292001	0.999892	0.999892	0.987855	40	0	6.08177	7.18344	0	7.30239	0.235294	0.02	-0.148921
ACR_1	chr11	119374844	119374844	C	G	exonic	Slc26a11	NA	nonsynonymous SNV	Slc26a11:NM_178743:exon12:c.C1182G:p.I394M	exonic	Slc26a11	NA	nonsynonymous SNV	Slc26a11:uc007mqn.1:exon7:c.C666G:p.I222M,Slc26a11:uc007mqm.1:exon12:c.C1182G:p.I394M	exonic	ENSMUSG00000039908	NA	nonsynonymous SNV	ENSMUSG00000039908:ENSMUST00000050880:exon12:c.C1182G:p.I394M	11qE2	NA	NA	+	CTGCCGTGATCATCACGGCTG	chr11	119374844	GATxATC	C	G	67_S4_L001_R1_001	64_Jiri_S1_L001_R1_001	0	NOVEL	COVERED	0.851982	0.851984	0.999998	0.999998	0.999763	72	0	1.09865	6.9662	3.7023	3.19861	0.105263	0.02	-0.332721
ACR_1	chr11	120446482	120446482	A	C	UTR3	Tspan10	NM_145363:c.*78A>C	NA	NA	UTR3	Tspan10	uc007msr.2:c.*78A>C,uc011yiz.1:c.*78A>C	NA	NA	UTR3	ENSMUSG00000039691	ENSMUST00000044105:c.*78A>C	NA	NA	11qE2	NA	NA	+	CTCACCTTCCAGGGAAGGTGA	chr11	120446482	TCCxGGG	A	C	67_S4_L001_R1_001	70_S7_L001_R1_001	0	NOVEL	COVERED	0.423477	0.423478	0.999998	0.999998	0.999763	55	0	6.1912	8.07102	0	8.87213	0.190476	0.02	-0.184084
ACR_1	chr12	3499013	3499013	G	T	intronic	Asxl2	NA	NA	NA	intronic	Asxl2	NA	NA	NA	UTR3	ENSMUSG00000037486	ENSMUST00000092003:c.*2002G>T	NA	NA	12qA1.1	NA	NA	+	TTTTTTTTTTGGTTTTTGGTT	chr12	3499013	TTTxGTT	G	T	67_S4_L001_R1_001	E210_S1	0	NOVEL	COVERED	0.860889	0.865745	0.994391	0.994391	0	53	1	6.44798	8.09618	9.33892	0	0.217391	0.02	-0.336216
ACR_1	chr12	4851168	4851168	G	T	exonic	BC068281	NA	synonymous SNV	BC068281:NM_001170858:exon2:c.G1023T:p.L341L,BC068281:NM_173416:exon2:c.G1023T:p.L341L	exonic	BC068281	NA	synonymous SNV	BC068281:uc033gck.1:exon1:c.G1023T:p.L341L,BC068281:uc007mym.2:exon2:c.G1023T:p.L341L,BC068281:uc007myn.2:exon2:c.G1023T:p.L341L,BC068281:uc007myl.2:exon3:c.G1023T:p.L341L	exonic	ENSMUSG00000051721	NA	synonymous SNV	ENSMUSG00000051721:ENSMUST00000085793:exon1:c.G1023T:p.L341L,ENSMUSG00000051721:ENSMUST00000053034:exon2:c.G1023T:p.L341L	12qA1.1	NA	NA	+	CATTTAACCTGACAGCAGAGC	chr12	4851168	CCTxACA	G	T	67_S4_L001_R1_001	64_Jiri_S1_L001_R1_001	0	NOVEL	COVERED	0.865745	0.865745	1	1	0.999993	81	0	1.27989	7.16309	8.27047	0	0.105263	0.02	-0.341882
ACR_1	chr12	31940410	31940410	G	C	exonic	Hbp1	NA	stopgain	Hbp1:NM_153198:exon3:c.C296G:p.S99X,Hbp1:NM_177993:exon3:c.C296G:p.S99X	exonic	Hbp1	NA	stopgain	Hbp1:uc007nhu.2:exon3:c.C296G:p.S99X,Hbp1:uc007nhv.2:exon3:c.C296G:p.S99X,Hbp1:uc007nhw.2:exon3:c.C296G:p.S99X	exonic	ENSMUSG00000002996	NA	stopgain	ENSMUSG00000002996:ENSMUST00000167458:exon3:c.C296G:p.S99X,ENSMUSG00000002996:ENSMUST00000172314:exon3:c.C296G:p.S99X,ENSMUSG00000002996:ENSMUST00000175686:exon3:c.C308G:p.S103X,ENSMUSG00000002996:ENSMUST00000176084:exon3:c.C266G:p.S89X,ENSMUSG00000002996:ENSMUST00000176103:exon3:c.C296G:p.S99X,ENSMUSG00000002996:ENSMUST00000176520:exon3:c.C266G:p.S89X	12qA3	NA	NA	-	GCTCCAAGATGATCTTGGATA	chr12	31940410	GATxATC	G	C	67_S4_L001_R1_001	64_Jiri_S1_L001_R1_001	0	NOVEL	COVERED	0.781058	0.78106	0.999997	0.999997	0.998875	62	0	2.08279	6.96834	3.38456	3.39445	0.117647	0.02	-0.298032
ACR_1	chr12	52886408	52886408	G	T	exonic	Akap6	NA	stopgain	Akap6:NM_198111:exon4:c.G682T:p.E228X	exonic	Akap6	NA	stopgain	Akap6:uc011ylu.1:exon3:c.G673T:p.E225X,Akap6:uc007nnm.1:exon4:c.G682T:p.E228X	exonic	ENSMUSG00000061603	NA	stopgain	ENSMUSG00000061603:ENSMUST00000095737:exon4:c.G682T:p.E228X	12qC1	NA	NA	+	TACTGCCTTTGAACTTTCTGA	chr12	52886408	TTTxAAC	G	T	67_S4_L001_R1_001	64_Jiri_S1_L001_R1_001	0	NOVEL	COVERED	0.490543	0.490544	0.999998	0.999998	0.999725	56	0	19.1437	19.2417	11.7576	6.84335	0.428571	0.02	-0.20112
ACR_1	chr12	55600462	55600462	C	G	exonic	Insm2	NA	stopgain	Insm2:NM_020287:exon1:c.C990G:p.Y330X	exonic	Insm2	NA	stopgain	Insm2:uc007not.1:exon1:c.C990G:p.Y330X	exonic	ENSMUSG00000045440	NA	stopgain	ENSMUSG00000045440:ENSMUST00000051857:exon1:c.C990G:p.Y330X	12qC1	NA	NA	+	AGGCTCCCTACCCCGAGGTGA	chr12	55600462	CTAxCCC	C	G	67_S4_L001_R1_001	64_Jiri_S1_L001_R1_001	0	NOVEL	COVERED	0.97082	0.97082	1	1	1	117	0	18.709	22.9021	23.2152	1.72771	0.207547	0.02	1.13285
ACR_1	chr12	84773403	84773403	T	C	intronic	Isca2	NA	NA	NA	intronic	Isca2	NA	NA	NA	intronic	ENSMUSG00000021241	NA	NA	NA	12qD1	NA	NA	+	TTAGGAAGGGTGTTGGGTTCT	chr12	84773403	GGGxGTT	T	C	67_S4_L001_R1_001	64_Jiri_S1_L001_R1_001	0	NOVEL	COVERED	0.976865	0.976865	1	1	1	116	0	1.42176	8.86699	5.28675	6.38285	0.12963	0.02	1.02876
ACR_1	chr12	101883443	101883443	T	G	exonic	Trip11	NA	nonsynonymous SNV	Trip11:NM_028446:exon11:c.A4361C:p.D1454A	exonic	Trip11	NA	nonsynonymous SNV	Trip11:uc007ots.2:exon11:c.A4358C:p.D1453A,Trip11:uc007ott.2:exon11:c.A4361C:p.D1454A,Trip11:uc007otu.2:exon11:c.A3494C:p.D1165A	exonic	ENSMUSG00000021188	NA	nonsynonymous SNV	ENSMUSG00000021188:ENSMUST00000177183:exon5:c.A3506C:p.D1169A,ENSMUSG00000021188:ENSMUST00000021605:exon11:c.A4361C:p.D1454A	12qE	NA	NA	-	TTTAGAAATGTCCATTTCTAA	chr12	101883443	ATGxCCA	T	G	67_S4_L001_R1_001	E210_S1	0	NOVEL	COVERED	0.668523	0.668523	0.999999	0.999999	0.999855	65	0	4.29968	7.72858	3.93257	3.80103	0.142857	0.02	-0.253762
ACR_1	chr12	101883444	101883444	C	A	exonic	Trip11	NA	nonsynonymous SNV	Trip11:NM_028446:exon11:c.G4360T:p.D1454Y	exonic	Trip11	NA	nonsynonymous SNV	Trip11:uc007ots.2:exon11:c.G4357T:p.D1453Y,Trip11:uc007ott.2:exon11:c.G4360T:p.D1454Y,Trip11:uc007otu.2:exon11:c.G3493T:p.D1165Y	exonic	ENSMUSG00000021188	NA	nonsynonymous SNV	ENSMUSG00000021188:ENSMUST00000177183:exon5:c.G3505T:p.D1169Y,ENSMUSG00000021188:ENSMUST00000021605:exon11:c.G4360T:p.D1454Y	12qE	NA	NA	-	TTAGAAATGTCCATTTCTAAA	chr12	101883444	TGTxCAT	C	A	67_S4_L001_R1_001	E210_S1	0	NOVEL	COVERED	0.668523	0.668523	1	1	0.999912	66	0	3.78508	7.22743	3.73283	3.49982	0.142857	0.02	-0.254039
ACR_1	chr12	107911050	107911050	G	C	UTR3	Bcl11b	NM_001286343:c.*4350C>G,NM_021399:c.*4350C>G,NM_001079883:c.*4350C>G	NA	NA	UTR3	Bcl11b	uc007ozh.1:c.*4350C>G,uc007ozi.1:c.*4350C>G,uc011yrp.1:c.*4350C>G	NA	NA	UTR3	ENSMUSG00000048251	ENSMUST00000066060:c.*4350C>G	NA	NA	12qF1	NA	NA	-	AACCCGACCTGAGGTCGGCTG	chr12	107911050	CCTxAGG	G	C	67_S4_L001_R1_001	70_S7_L001_R1_001	0	NOVEL	COVERED	0.986153	0.986153	1	1	1	151	0	0.212335	8.73825	4.32649	4.58364	0.107143	0.02	0.890503
ACR_1	chr12	118848735	118848735	G	T	exonic	Sp8	NA	synonymous SNV	Sp8:NM_177082:exon3:c.G324T:p.A108A	exonic	Sp8	NA	synonymous SNV	Sp8:uc033ggl.1:exon1:c.G324T:p.A108A,Sp8:uc007pig.2:exon2:c.G378T:p.A126A,Sp8:uc007pih.2:exon3:c.G324T:p.A108A	exonic	ENSMUSG00000048562	NA	synonymous SNV	ENSMUSG00000048562:ENSMUST00000063918:exon3:c.G324T:p.A108A	12qF2	NA	NA	+	CCGCCGCAGCGGCAGCAGCTG	chr12	118848735	AGCxGCA	G	T	67_S4_L001_R1_001	64_Jiri_S1_L001_R1_001	0	NOVEL	COVERED	0.963771	0.963774	0.999997	0.999997	0.999667	82	0	0.934248	8.34401	5.35212	2.9573	0.104167	0.02	1.05609
ACR_1	chr13	22040742	22040742	T	G	downstream	Hist1h4i	NA	NA	NA	downstream	Hist1h4i	NA	NA	NA	downstream	ENSMUSG00000060639	NA	NA	NA	13qA3.1	NA	NA	-	CCGAGAAAATTAACCTTCTGT	chr13	22040742	AATxAAC	T	G	67_S4_L001_R1_001	64_Jiri_S1_L001_R1_001	0	NOVEL	COVERED	1	1	1	1	1	338	0	82.409	89.3758	32.32	62.9051	0.277419	0.02	3.41007
ACR_1	chr13	23533895	23533895	C	T	upstream	Hist1h2af	NA	NA	NA	upstream	Hist1h2af	NA	NA	NA	upstream	ENSMUSG00000061991	NA	NA	NA	13qA3.1	NA	NA	+	CAGATCCTGACAGCAAGGTAC	chr13	23533895	TGAxAGC	C	T	67_S4_L001_R1_001	64_Jiri_S1_L001_R1_001	0	NOVEL	COVERED	0.999998	0.999998	1	1	1	238	0	29.8724	40.7074	36.1999	12.723	0.186441	0.02	1.96811
ACR_1	chr14	31174465	31174465	T	C	exonic	Nisch	NA	nonsynonymous SNV	Nisch:NM_022656:exon17:c.A3514G:p.R1172G	exonic	Nisch	NA	nonsynonymous SNV	Nisch:uc007swy.1:exon6:c.A1960G:p.R654G,Nisch:uc007swz.1:exon17:c.A3514G:p.R1172G	exonic	ENSMUSG00000021910	NA	nonsynonymous SNV	ENSMUSG00000021910:ENSMUST00000168206:exon13:c.A2779G:p.R927G,ENSMUSG00000021910:ENSMUST00000022469:exon17:c.A3514G:p.R1172G	14qB	NA	NA	-	GCGGGACCCCTTGCTGGAGCG	chr14	31174465	CCCxTGC	T	C	67_S4_L001_R1_001	64_Jiri_S1_L001_R1_001	0	NOVEL	COVERED	0.552886	0.552887	0.999997	0.999997	0.999693	57	0	8.8723	10.5603	7.78355	10.948	0.217391	0.02	-0.219023
ACR_1	chr15	80373676	80373676	T	C	exonic	Cacna1i	NA	synonymous SNV	Cacna1i:NM_001044308:exon19:c.T3406C:p.L1136L	exonic	Cacna1i	NA	synonymous SNV	Cacna1i:uc009var.1:exon19:c.T3406C:p.L1136L	exonic	ENSMUSG00000022416	NA	synonymous SNV	ENSMUSG00000022416:ENSMUST00000160424:exon19:c.T3406C:p.L1136L,ENSMUSG00000022416:ENSMUST00000162155:exon19:c.T3406C:p.L1136L	15qE1	NA	NA	+	CTACGTGGTCTTGGCCTTCAT	chr15	80373676	GTCxTGG	T	C	67_S4_L001_R1_001	64_Jiri_S1_L001_R1_001	0	NOVEL	COVERED	0.520328	0.522161	0.99649	0.99649	0	39	0	11.8402	13.2034	9.47672	8.78199	0.25	0.02	-0.210422
ACR_1	chr15	84314910	84314910	T	G	UTR3	Parvb	NM_133167:c.*1879T>G	NA	NA	UTR3	Parvb	uc007xby.1:c.*1879T>G	NA	NA	UTR3	ENSMUSG00000022438	ENSMUST00000023072:c.*1879T>G	NA	NA	15qE2	NA	NA	+	GAGGCAGAACTTGGGAAGCCA	chr15	84314910	AACxTGG	T	G	67_S4_L001_R1_001	64_Jiri_S1_L001_R1_001	0	NOVEL	COVERED	0.999999	0.999999	1	1	1	205	0	-9.49535	10.6891	11.0565	-0.253628	0.092437	0.02	1.28097
ACR_1	chr15	98642609	98642609	C	G	exonic	Cacnb3	NA	synonymous SNV	Cacnb3:NM_001286226:exon11:c.C1017G:p.G339G,Cacnb3:NM_001044741:exon12:c.C1095G:p.G365G,Cacnb3:NM_007581:exon12:c.C1098G:p.G366G	exonic	Cacnb3	NA	synonymous SNV	Cacnb3:uc007xnd.2:exon8:c.C141G:p.G47G,Cacnb3:uc011zza.2:exon11:c.C1017G:p.G339G,Cacnb3:uc007xnb.2:exon12:c.C1095G:p.G365G,Cacnb3:uc007xnc.2:exon12:c.C1098G:p.G366G	exonic	ENSMUSG00000003352	NA	synonymous SNV	ENSMUSG00000003352:ENSMUST00000003442:exon12:c.C1098G:p.G366G,ENSMUSG00000003352:ENSMUST00000109150:exon12:c.C1095G:p.G365G	15qF1	NA	NA	+	CAGCACCGGGCCCCGGACTGC	chr15	98642609	GGGxCCC	C	G	67_S4_L001_R1_001	64_Jiri_S1_L001_R1_001	0	NOVEL	COVERED	0.954489	0.954491	0.999998	0.999998	0.999763	83	0	-1.95422	6.35904	1.53379	4.527	0.083333	0.02	-0.425227
ACR_1	chr15	100374915	100374915	T	G	exonic	Higd1c,Methig1	NA	nonsynonymous SNV	Higd1c:NM_001002900:exon3:c.T128G:p.L43R,Methig1:NM_001024672:exon3:c.T632G:p.L211R	exonic	Mettl7a2Higd1c	NA	nonsynonymous SNV	Mettl7a2Higd1c:uc007xra.1:exon3:c.T632G:p.L211R,Mettl7a2Higd1c:uc007xrb.1:exon3:c.T128G:p.L43R	exonic	ENSMUSG00000093550,ENSMUSG00000093789	NA	nonsynonymous SNV	ENSMUSG00000093789:ENSMUST00000175929:exon2:c.T535G:p.F179V,ENSMUSG00000093789:ENSMUST00000075675:exon3:c.T632G:p.L211R,ENSMUSG00000093789:ENSMUST00000108953:exon3:c.T128G:p.L43R,ENSMUSG00000093550:ENSMUST00000177211:exon3:c.T128G:p.L43R,ENSMUSG00000093550:ENSMUST00000175683:exon4:c.T128G:p.L43R	15qF1	NA	NA	NA	TCCTACGGTCTTTACAAGCTA	chr15	100374915	GTCxTTA	T	G	67_S4_L001_R1_001	64_Jiri_S1_L001_R1_001	0	NOVEL	COVERED	0.865743	0.865745	0.999997	0.999997	0.999693	71	0	48.6205	48.8239	29.302	26.3294	0.578947	0.02	-0.340199
ACR_1	chr16	10742949	10742949	C	G	UTR3	Clec16a	NM_001204229:c.*980C>G,NM_177562:c.*980C>G	NA	NA	UTR3	Clec16a	uc007yea.2:c.*980C>G,uc033gxl.1:c.*980C>G,uc007yec.2:c.*1383C>G	NA	NA	UTR3	ENSMUSG00000068663	ENSMUST00000066345:c.*980C>G,ENSMUST00000115824:c.*980C>G,ENSMUST00000155633:c.*980C>G	NA	NA	16qA1	NA	NA	+	AAAGCAGAATCCCACCCTCCC	chr16	10742949	AATxCCA	C	G	67_S4_L001_R1_001	64_Jiri_S1_L001_R1_001	0	NOVEL	COVERED	1	1	1	1	1	736	1	34.9674	60.2206	19.7725	52.9501	0.15859	0.02	6.44779
ACR_1	chr16	81578675	81578675	C	G	intronic	Ncam2	NA	NA	NA	intronic	Ncam2	NA	NA	NA	intronic	ENSMUSG00000022762	NA	NA	NA	16qC3.3	NA	NA	+	GAAAAAATATCATATTTTTTC	chr16	81578675	TATxATA	C	G	67_S4_L001_R1_001	64_Jiri_S1_L001_R1_001	0	NOVEL	COVERED	0.998465	0.998465	1	1	1	164	0	-0.093668	12.0981	12.8769	0	0.094595	0.02	0.842977
ACR_1	chr16	97742550	97742550	A	T	UTR3	Ripk4	NM_023663:c.*535T>A	NA	NA	UTR3	Ripk4	uc008adn.1:c.*535T>A	NA	NA	UTR3	ENSMUSG00000005251	ENSMUST00000113743:c.*535T>A,ENSMUST00000019386:c.*535T>A	NA	NA	16qC4	NA	NA	-	ATGAAACAGCAGTTTCATGTT	chr16	97742550	AGCxGTT	A	T	67_S4_L001_R1_001	64_Jiri_S1_L001_R1_001	0	NOVEL	COVERED	0.800244	0.800245	0.999998	0.999998	0.999725	68	0	8.03125	11.6045	8.87159	3.10991	0.171429	0.02	-0.306864
ACR_1	chr17	7804838	7804838	A	G	exonic	Fndc1	NA	nonsynonymous SNV	Fndc1:NM_001081416:exon1:c.T137C:p.I46T	exonic	Fndc1	NA	nonsynonymous SNV	Fndc1:uc008aio.1:exon1:c.T137C:p.I46T	exonic	ENSMUSG00000071984	NA	nonsynonymous SNV	ENSMUSG00000071984:ENSMUST00000097425:exon1:c.T137C:p.I46T,ENSMUSG00000071984:ENSMUST00000169126:exon2:c.T284C:p.I95T	17qA1	NA	NA	-	CACGTCCTTAATAAGGAAGGA	chr17	7804838	TTAxTAA	A	G	67_S4_L001_R1_001	64_Jiri_S1_L001_R1_001	0	NOVEL	COVERED	0.999998	0.999998	1	1	1	220	0	25.5288	37.544	29.033	11.8696	0.17094	0.02	2.16943
ACR_1	chr17	14673254	14673254	T	C	exonic	Thbs2	NA	nonsynonymous SNV	Thbs2:NM_011581:exon17:c.A2663G:p.D888G	exonic	Thbs2	NA	nonsynonymous SNV	Thbs2:uc008anb.2:exon17:c.A2663G:p.D888G	exonic	ENSMUSG00000023885	NA	nonsynonymous SNV	ENSMUSG00000023885:ENSMUST00000170872:exon17:c.A2663G:p.D888G	17qA2	NA	NA	-	GCCGTCGTTGTCATGGTCAGC	chr17	14673254	TTGxCAT	T	C	67_S4_L001_R1_001	64_Jiri_S1_L001_R1_001	0	NOVEL	COVERED	0.92664	0.92664	1	1	0.999997	91	0	-0.81317	6.8573	3.33377	7.42243	0.088889	0.02	-0.39425
ACR_1	chr17	24881383	24881383	C	A	exonic	Igfals	NA	synonymous SNV	Igfals:NM_008340:exon2:c.C1447A:p.R483R	exonic	Igfals	NA	synonymous SNV	Igfals:uc008ayn.1:exon2:c.C1447A:p.R483R	exonic	ENSMUSG00000046070	NA	synonymous SNV	ENSMUSG00000046070:ENSMUST00000050714:exon2:c.C1447A:p.R483R	17qA3.3	NA	NA	+	CCCTCTGCAGCGGGCCTTCTG	chr17	24881383	CAGxGGG	C	A	67_S4_L001_R1_001	64_Jiri_S1_L001_R1_001	0	NOVEL	COVERED	0.781058	0.78106	0.999997	0.999997	0.998875	62	0	2.18976	7.06882	7.29917	0	0.117647	0.02	-0.297896
ACR_1	chr17	25392135	25392135	G	T	exonic	Cacna1h	NA	nonsynonymous SNV	Cacna1h:NM_001163691:exon9:c.C1688A:p.P563Q,Cacna1h:NM_021415:exon9:c.C1688A:p.P563Q	exonic	Cacna1h	NA	nonsynonymous SNV	Cacna1h:uc033hbt.1:exon8:c.C1688A:p.P563Q,Cacna1h:uc008bav.2:exon9:c.C1688A:p.P563Q,Cacna1h:uc012ang.1:exon9:c.C1688A:p.P563Q	exonic	ENSMUSG00000024112	NA	nonsynonymous SNV	ENSMUSG00000024112:ENSMUST00000078496:exon9:c.C1688A:p.P563Q,ENSMUSG00000024112:ENSMUST00000159048:exon9:c.C1370A:p.P457Q,ENSMUSG00000024112:ENSMUST00000159610:exon9:c.C1688A:p.P563Q	17qA3.3	NA	NA	-	CCCGTGGCCTGGGGATGGTGG	chr17	25392135	CCTxGGG	G	T	67_S4_L001_R1_001	64_Jiri_S1_L001_R1_001	0	NOVEL	UNCOVERED	0.139048	0.139832	0.994391	0.994391	0	25	0	5.65217	6.31266	0	6.94467	0.25	0.02	-0.10453
ACR_1	chr17	26210823	26210823	A	C	UTR3	Rgs11	NM_001081069:c.*93A>C	NA	NA	UTR3	Rgs11	uc008bdr.1:c.*93A>C,uc008bds.1:c.*93A>C,uc008bdt.1:c.*93A>C,uc008bdu.1:c.*93A>C	NA	NA	UTR3	ENSMUSG00000024186	ENSMUST00000122058:c.*93A>C,ENSMUST00000025020:c.*93A>C	NA	NA	17qA3.3	NA	NA	+	CAGCACTGGCATCACTGTGTA	chr17	26210823	GGCxTCA	A	C	67_S4_L001_R1_001	64_Jiri_S1_L001_R1_001	0	NOVEL	COVERED	0.52216	0.522161	0.999998	0.999998	0.999763	58	0	3.78137	6.34792	1.68577	6.77822	0.166667	0.02	-0.209625
ACR_1	chr17	32336524	32336524	T	G	exonic	Akap8l	NA	nonsynonymous SNV	Akap8l:NM_017476:exon5:c.A580C:p.M194L	exonic	Akap8l	NA	nonsynonymous SNV	Akap8l:uc008bwj.1:exon5:c.A580C:p.M194L,Akap8l:uc008bwk.1:exon6:c.A478C:p.M160L	exonic	ENSMUSG00000002625	NA	nonsynonymous SNV	ENSMUSG00000002625:ENSMUST00000050214:exon5:c.A580C:p.M194L	17qB1	NA	NA	-	CCCGAGGCCATTGGCCGTCCA	chr17	32336524	CCAxTGG	T	G	67_S4_L001_R1_001	64_Jiri_S1_L001_R1_001	0	NOVEL	UNCOVERED	0.139812	0.139832	0.999859	0.999859	0	30	0	5.92025	6.60173	7.72447	0	0.25	0.02	-0.105209
ACR_1	chr17	47739789	47739789	A	T	intronic	Tfeb	NA	NA	NA	intronic	Tfeb	NA	NA	NA	UTR5	ENSMUSG00000023990	ENSMUST00000113284:c.-46198A>T	NA	NA	17qC	NA	NA	+	GGGCTGTCATAGCAATGACAG	chr17	47739789	CATxGCA	A	T	67_S4_L001_R1_001	E210_S1	0	NOVEL	COVERED	0.967299	0.967425	0.999869	0.999869	0.984784	73	0	2.23986	9.31794	2.5924	6.7408	0.12	0.02	0.965477
ACR_1	chr17	57065109	57065109	C	G	exonic	Crb3	NA	nonsynonymous SNV	Crb3:NM_177638:exon4:c.C155G:p.A52G	exonic	Crb3	NA	nonsynonymous SNV	Crb3:uc008ddw.1:exon4:c.C155G:p.A52G,Crb3:uc008ddx.1:exon4:c.C155G:p.A52G	exonic	ENSMUSG00000044279	NA	nonsynonymous SNV	ENSMUSG00000044279:ENSMUST00000163628:exon3:c.C132G:p.S44R,ENSMUSG00000044279:ENSMUST00000163763:exon3:c.C155G:p.A52G,ENSMUSG00000044279:ENSMUST00000097299:exon4:c.C155G:p.A52G,ENSMUSG00000044279:ENSMUST00000169543:exon4:c.C155G:p.A52G,ENSMUSG00000044279:ENSMUST00000071826:exon5:c.C155G:p.A52G	17qD	NA	NA	+	GCTATTGTAGCCATCACTGTG	chr17	57065109	TAGxCAT	C	G	67_S4_L001_R1_001	64_Jiri_S1_L001_R1_001	0	NOVEL	COVERED	0.353946	0.353947	0.999997	0.999997	0.99963	48	0	6.99147	8.46396	4.03235	6.68533	0.210526	0.02	-0.166581
ACR_1	chr17	58364194	58364194	T	G	exonic	Cntnap5c	NA	nonsynonymous SNV	Cntnap5c:NM_001081653:exon21:c.T3376G:p.S1126A	exonic	Cntnap5c	NA	nonsynonymous SNV	Cntnap5c:uc008dew.1:exon21:c.T3376G:p.S1126A	exonic	ENSMUSG00000038048	NA	nonsynonymous SNV	ENSMUSG00000038048:ENSMUST00000076038:exon21:c.T3376G:p.S1126A	17qD	NA	NA	+	CTATACTTTCTCACTAGAATC	chr17	58364194	TTCxCAC	T	G	67_S4_L001_R1_001	64_Jiri_S1_L001_R1_001	0	NOVEL	COVERED	0.612407	0.612407	1	1	0.999992	68	0	12.0164	13.4337	5.67569	9.38098	0.259259	0.02	-0.236495
ACR_1	chr17	71588869	71588869	T	A	ncRNA_exonic	Trmt61b	NA	NA	NA	ncRNA_exonic	Trmt61b	NA	NA	NA	ncRNA_exonic	ENSMUSG00000085492	NA	NA	NA	17qE1.3	NA	NA	-	TCTGAAGTAGTGACTAATAAT	chr17	71588869	TAGxGAC	T	A	67_S4_L001_R1_001	64_Jiri_S1_L001_R1_001	0	NOVEL	COVERED	0.999998	0.999998	1	1	1	231	0	102.2	103.578	15.3541	93.7211	0.382609	0.02	2.16991
ACR_1	chr17	88742655	88742655	T	G	exonic	Lhcgr	NA	nonsynonymous SNV	Lhcgr:NM_013582:exon11:c.A1442C:p.K481T	exonic	Lhcgr	NA	nonsynonymous SNV	Lhcgr:uc008dvv.1:exon11:c.A1014C:p.K338N,Lhcgr:uc008dvw.1:exon11:c.A1442C:p.K481T	exonic	ENSMUSG00000024107	NA	nonsynonymous SNV	ENSMUSG00000024107:ENSMUST00000024916:exon11:c.A1442C:p.K481T	17qE4	NA	NA	-	CAGCCTCAGCTTTTGGTCCAG	chr17	88742655	AGCxTTT	T	G	67_S4_L001_R1_001	64_Jiri_S1_L001_R1_001	0	NOVEL	COVERED	0.693584	0.693668	0.999879	0.999879	0.986224	52	0	7.34018	9.85349	4.73166	5.16686	0.2	0.02	-0.262703
ACR_1	chr18	15452635	15452635	T	C	exonic	Chst9	NA	synonymous SNV	Chst9:NM_199055:exon4:c.A870G:p.E290E	exonic	Chst9	NA	synonymous SNV	Chst9:uc008edv.1:exon4:c.A870G:p.E290E,Chst9:uc008edw.1:exon6:c.A732G:p.E244E	exonic	ENSMUSG00000047161	NA	synonymous SNV	ENSMUSG00000047161:ENSMUST00000053017:exon4:c.A870G:p.E290E	18qA1	NA	NA	-	TATTTAATGCTTCTGCAGAGG	chr18	15452635	TGCxTCT	T	C	67_S4_L001_R1_001	70_S7_L001_R1_001	0	NOVEL	COVERED	0.92664	0.92664	1	1	1	99	0	5.82709	11.4593	0	13.0818	0.136364	0.02	-0.3944
ACR_1	chr18	36301489	36301489	G	C	downstream	Igip	NA	NA	NA	downstream	Igip	NA	NA	NA	UTR3	ENSMUSG00000043991	ENSMUST00000051301:c.*13362G>C	NA	NA	18qB2	NA	NA	+	AAAAAATAAAGATGTTTATTT	chr18	36301489	AAAxATG	G	C	67_S4_L001_R1_001	70_S7_L001_R1_001	0	NOVEL	COVERED	0.999559	0.999559	1	1	1	206	0	-6.47723	9.39916	0	10.173	0.071429	0.02	0.764076
ACR_1	chr18	42219948	42219948	A	C	exonic	Lars	NA	nonsynonymous SNV	Lars:NM_134137:exon24:c.T2403G:p.S801R	exonic	Lars	NA	nonsynonymous SNV	Lars:uc008etp.1:exon24:c.T2403G:p.S801R	exonic	ENSMUSG00000024493	NA	nonsynonymous SNV	ENSMUSG00000024493:ENSMUST00000097590:exon24:c.T2403G:p.S801R	18qB3	NA	NA	-	CATTCATTTCACTATTGAATA	chr18	42219948	TTCxCTA	A	C	67_S4_L001_R1_001	E210_S1	0	NOVEL	COVERED	1	1	1	1	1	655	0	-56.0371	15.4593	2.83128	16.5372	0.038585	0.02	6.23116
ACR_1	chr18	45559491	45559491	A	T	upstream	Kcnn2	NA	NA	NA	exonic	Kcnn2	NA	nonsynonymous SNV	Kcnn2:uc008eve.1:exon1:c.A133T:p.T45S,Kcnn2:uc008evf.1:exon1:c.A133T:p.T45S,Kcnn2:uc008evd.1:exon4:c.A133T:p.T45S	exonic	ENSMUSG00000054477	NA	nonsynonymous SNV	ENSMUSG00000054477:ENSMUST00000066890:exon4:c.A133T:p.T45S,ENSMUSG00000054477:ENSMUST00000183850:exon4:c.A133T:p.T45S	18qB3	NA	NA	+	AGGGTGCACCACCGCCTGGTC	chr18	45559491	ACCxCCG	A	T	67_S4_L001_R1_001	64_Jiri_S1_L001_R1_001	0	NOVEL	COVERED	0.454842	0.457757	0.993634	0.993634	0	34	0	10.5382	11.5675	8.31746	3.66391	0.272727	0.02	-0.192489
ACR_1	chr19	5690248	5690248	T	G	exonic	Map3k11	NA	nonsynonymous SNV	Map3k11:NM_022012:exon3:c.T2G:p.M1R	exonic	Map3k11	NA	nonsynonymous SNV	Map3k11:uc008get.1:exon3:c.T2G:p.M1R	exonic	ENSMUSG00000004054	NA	nonsynonymous SNV	ENSMUSG00000004054:ENSMUST00000004156:exon3:c.T2G:p.M1R	19qA	NA	NA	+	CTCCCTGCCATGGAGCCCTTG	chr19	5690248	CCAxGGA	T	G	67_S4_L001_R1_001	64_Jiri_S1_L001_R1_001	0	NOVEL	UNCOVERED	0.076902	0.077336	0.994391	0.994391	0	22	0	6.43114	6.648	6.648	0	0.333333	0.02	-0.078699
ACR_1	chr19	6091540	6091540	T	A	UTR3	Cdca5	NM_026410:c.*812T>A	NA	NA	UTR3	Cdca5	uc008ghh.1:c.*812T>A,uc008ghi.1:c.*812T>A	NA	NA	UTR3	ENSMUSG00000024791	ENSMUST00000025704:c.*812T>A	NA	NA	19qA	NA	NA	+	TTAAAGGCCATTGGCCTTCCA	chr19	6091540	CCAxTGG	T	A	67_S4_L001_R1_001	E210_S1	0	NOVEL	COVERED	0.918171	0.918171	1	1	0.999994	87	0	-0.701124	6.70018	2.98568	3.9827	0.090909	0.02	-0.385238
ACR_1	chr19	7457482	7457482	T	C	exonic	Rtn3	NA	nonsynonymous SNV	Rtn3:NM_001003933:exon2:c.A1087G:p.T363A,Rtn3:NM_001003934:exon3:c.A1144G:p.T382A	exonic	Rtn3	NA	nonsynonymous SNV	Rtn3:uc029tqx.1:exon1:c.A898G:p.T300A,Rtn3:uc008gld.2:exon2:c.A1087G:p.T363A,Rtn3:uc008glb.2:exon3:c.A1144G:p.T382A	exonic	ENSMUSG00000024758	NA	nonsynonymous SNV	ENSMUSG00000024758:ENSMUST00000088171:exon2:c.A1087G:p.T363A,ENSMUSG00000024758:ENSMUST00000065304:exon3:c.A1144G:p.T382A	19qA	NA	NA	-	GTAATGGGAGTGCTCCCATTA	chr19	7457482	GAGxGCT	T	C	67_S4_L001_R1_001	64_Jiri_S1_L001_R1_001	0	NOVEL	COVERED	0.851984	0.851984	1	1	1	98	0	5.578	9.72328	5.78609	6.17601	0.162162	0.02	-0.331388
ACR_1	chr19	7457483	7457483	G	A	exonic	Rtn3	NA	synonymous SNV	Rtn3:NM_001003933:exon2:c.C1086T:p.S362S,Rtn3:NM_001003934:exon3:c.C1143T:p.S381S	exonic	Rtn3	NA	synonymous SNV	Rtn3:uc029tqx.1:exon1:c.C897T:p.S299S,Rtn3:uc008gld.2:exon2:c.C1086T:p.S362S,Rtn3:uc008glb.2:exon3:c.C1143T:p.S381S	exonic	ENSMUSG00000024758	NA	synonymous SNV	ENSMUSG00000024758:ENSMUST00000088171:exon2:c.C1086T:p.S362S,ENSMUSG00000024758:ENSMUST00000065304:exon3:c.C1143T:p.S381S	19qA	NA	NA	-	TAATGGGAGTGCTCCCATTAA	chr19	7457483	AGTxCTC	G	A	67_S4_L001_R1_001	64_Jiri_S1_L001_R1_001	0	NOVEL	COVERED	0.851984	0.851984	1	1	1	98	0	6.84961	10.6315	7.18344	5.58584	0.166667	0.02	-0.323917
ACR_1	chr19	29960359	29960359	G	A	UTR3	Il33	NM_133775:c.*1318G>A,NM_001164724:c.*1318G>A	NA	NA	UTR3	Il33	uc008hec.2:c.*1318G>A,uc008hed.2:c.*1318G>A	NA	NA	UTR3	ENSMUSG00000024810	ENSMUST00000120388:c.*1318G>A,ENSMUST00000025724:c.*1318G>A	NA	NA	19qC1	NA	NA	+	AACTTAAAACGATAAAGACAA	chr19	29960359	AACxATA	G	A	67_S4_L001_R1_001	64_Jiri_S1_L001_R1_001	0	NOVEL	COVERED	1	1	1	1	1	972	0	107.684	158.008	81.8632	105.154	0.169388	0.02	9.28047
ACR_1	chr19	45076250	45076250	A	T	intronic	Kazald1	NA	NA	NA	intronic	Kazald1	NA	NA	NA	intronic	ENSMUSG00000025213	NA	NA	NA	19qC3	NA	NA	+	AGTCGCTGGTATGTCCCCAGC	chr19	45076250	GGTxTGT	A	T	67_S4_L001_R1_001	64_Jiri_S1_L001_R1_001	0	NOVEL	COVERED	0.353909	0.353947	0.999892	0.999892	0.987855	42	0	10.8859	11.1309	11.1063	5.80993	0.357143	0.02	-0.165398
ACR_1	chr19	53926246	53926246	T	A	exonic	Pdcd4	NA	nonsynonymous SNV	Pdcd4:NM_001168491:exon9:c.T1031A:p.I344K,Pdcd4:NM_001168492:exon9:c.T1031A:p.I344K,Pdcd4:NM_011050:exon9:c.T1031A:p.I344K	exonic	Pdcd4	NA	nonsynonymous SNV	Pdcd4:uc008hxb.2:exon9:c.T1031A:p.I344K,Pdcd4:uc008hxc.2:exon9:c.T1031A:p.I344K,Pdcd4:uc008hxd.2:exon9:c.T1031A:p.I344K	exonic	ENSMUSG00000024975	NA	nonsynonymous SNV	ENSMUSG00000024975:ENSMUST00000025931:exon9:c.T1031A:p.I344K,ENSMUSG00000024975:ENSMUST00000074371:exon9:c.T1031A:p.I344K,ENSMUSG00000024975:ENSMUST00000165617:exon9:c.T1031A:p.I344K	19qD2	NA	NA	+	TCTGGAGATATATCTGAAGCT	chr19	53926246	ATAxATC	T	A	67_S4_L001_R1_001	64_Jiri_S1_L001_R1_001	0	NOVEL	COVERED	1	1	1	1	1	533	0	36.7386	68.3741	45.7561	34.9526	0.143411	0.02	5.4251
ACR_1	chrX	104499497	104499497	T	A	intronic	Uprt	NA	NA	NA	intronic	Uprt	NA	NA	NA	intronic	ENSMUSG00000073016	NA	NA	NA	XqD	NA	NA	+	TTTTGTTTCTTTGCATGCATA	chrX	104499497	TCTxTGC	T	A	67_S4_L001_R1_001	64_Jiri_S1_L001_R1_001	0	NOVEL	COVERED	0.865743	0.865745	0.999997	0.999997	0.999646	69	0	0.578497	6.71743	0	7.19896	0.102564	0.02	-0.341886
ACR_1	chrX	107786902	107786902	A	T	UTR3	2610002M06Rik	NM_025921:c.*907T>A	NA	NA	UTR3	2610002M06Rik	uc009ucj.2:c.*907T>A	NA	NA	UTR3	ENSMUSG00000031242	ENSMUST00000120722:c.*907T>A	NA	NA	XqD	NA	NA	-	CCCACCCCCAAATCATAGAAA	chrX	107786902	CCAxATC	A	T	67_S4_L001_R1_001	64_Jiri_S1_L001_R1_001	0	NOVEL	COVERED	0.981955	0.981955	1	1	1	140	0	31.794	34.0928	31.3328	5.39779	0.285714	0.02	1.00944
ACR_1	chrX	111575974	111575974	T	G	UTR3	Hdx	NM_001290459:c.*1299A>C,NM_001080549:c.*1299A>C	NA	NA	UTR3	Hdx	uc009udb.1:c.*1299A>C,uc009udc.1:c.*1299A>C	NA	NA	UTR3	ENSMUSG00000034551	ENSMUST00000113422:c.*1299A>C,ENSMUST00000038472:c.*1299A>C	NA	NA	XqE1	NA	NA	-	ACTTGATAATTGAAACAGTTA	chrX	111575974	AATxGAA	T	G	67_S4_L001_R1_001	64_Jiri_S1_L001_R1_001	0	NOVEL	COVERED	0.99994	0.99994	1	1	1	213	0	30.197	37.8421	31.49	10.4786	0.208333	0.02	0.747677
ACR_1	chrX	37162983	37162983	T	G	exonic	Akap14	NA	nonsynonymous SNV	Akap14:NM_001033785:exon2:c.A1098C:p.K366N	exonic	Akap14	NA	nonsynonymous SNV	Akap14:uc009syh.1:exon2:c.A1098C:p.K366N	exonic	ENSMUSG00000036551	NA	nonsynonymous SNV	ENSMUSG00000036551:ENSMUST00000046557:exon2:c.A1098C:p.K366N	XqA3.3	NA	NA	-	CTACAGGCTTTTTCTCTTTTA	chrX	37162983	CTTxTTC	T	G	67_S4_L001_R1_001	64_Jiri_S1_L001_R1_001	0	NOVEL	COVERED	0.92664	0.92664	1	1	0.999992	86	0	4.22943	9.86909	6.62256	7.09562	0.136364	0.02	-0.393986
ACR_1	chrX	48542586	48542586	G	A	UTR3	Zfp280c	NM_001166648:c.*688C>T,NM_153532:c.*688C>T,NM_001166650:c.*716C>T,NM_001166649:c.*688C>T	NA	NA	UTR3	Zfp280c	uc009tcj.1:c.*716C>T,uc009tck.1:c.*688C>T,uc009tcl.1:c.*688C>T,uc009tcm.2:c.*688C>T	NA	NA	UTR3	ENSMUSG00000036916	ENSMUST00000076635:c.*688C>T,ENSMUST00000088898:c.*688C>T,ENSMUST00000072292:c.*688C>T,ENSMUST00000114940:c.*716C>T	NA	NA	XqA5	NA	NA	-	GAGGGAAGTTGTGCTCAAATC	chrX	48542586	GTTxTGC	G	A	67_S4_L001_R1_001	64_Jiri_S1_L001_R1_001	0	NOVEL	COVERED	1	1	1	1	1	521	0	51.7685	77.0437	14.1432	76.4457	0.168724	0.02	3.8361
ACR_1	chrX	64265274	64265274	T	A	intergenic	3830417A13Rik,Slitrk4	dist=86496;dist=4170	NA	NA	intergenic	JA187517,Slitrk4	dist=59594;dist=4170	NA	NA	UTR3	ENSMUSG00000046699	ENSMUST00000069926:c.*5272A>T	NA	NA	XqA7.1	NA	NA	NA	AGAAAAAAAATTGTCCTTTCT	chrX	64265274	AAAxTGT	T	A	67_S4_L001_R1_001	64_Jiri_S1_L001_R1_001	0	NOVEL	COVERED	1	1	1	1	1	781	0	8.11939	64.2934	59.234	27.853	0.104972	0.02	7.75465
ACR_1	chrX	74027612	74027612	G	C	UTR3	Mecp2	NM_001081979:c.*7805C>G,NM_010788:c.*7805C>G	NA	NA	UTR3	Mecp2	uc009tnt.2:c.*7805C>G,uc009tnu.2:c.*7805C>G	NA	NA	UTR3	ENSMUSG00000031393	ENSMUST00000100750:c.*7805C>G,ENSMUST00000170481:c.*7805C>G	NA	NA	XqA7.3	NA	NA	-	CTGTGTACTAGGGGGCAACAT	chrX	74027612	CTAxGGG	G	C	67_S4_L001_R1_001	64_Jiri_S1_L001_R1_001	0	NOVEL	COVERED	0.963774	0.963774	1	1	0.999999	99	0	12.3214	15.8388	8.38917	6.49448	0.22449	0.02	0.861347
ACR_1	chrX	74432912	74432912	T	G	exonic	Ikbkg	NA	synonymous SNV	Ikbkg:NM_001161422:exon2:c.T129G:p.S43S,Ikbkg:NM_001161423:exon2:c.T93G:p.S31S,Ikbkg:NM_001161424:exon2:c.T93G:p.S31S,Ikbkg:NM_010547:exon2:c.T93G:p.S31S,Ikbkg:NM_178590:exon2:c.T93G:p.S31S,Ikbkg:NM_001136067:exon3:c.T147G:p.S49S,Ikbkg:NM_001161421:exon3:c.T147G:p.S49S	exonic	Ikbkg	NA	synonymous SNV	Ikbkg:uc009tpc.2:exon2:c.T93G:p.S31S,Ikbkg:uc009tpd.2:exon2:c.T93G:p.S31S,Ikbkg:uc009tpe.2:exon2:c.T93G:p.S31S,Ikbkg:uc012hkz.1:exon2:c.T93G:p.S31S,Ikbkg:uc012hla.1:exon2:c.T129G:p.S43S,Ikbkg:uc009toz.2:exon3:c.T93G:p.S31S,Ikbkg:uc009tpa.2:exon3:c.T147G:p.S49S,Ikbkg:uc009tpb.2:exon3:c.T147G:p.S49S	exonic	ENSMUSG00000004221	NA	synonymous SNV	ENSMUSG00000004221:ENSMUST00000064407:exon2:c.T93G:p.S31S,ENSMUSG00000004221:ENSMUST00000114127:exon2:c.T93G:p.S31S,ENSMUSG00000004221:ENSMUST00000114130:exon2:c.T129G:p.S43S,ENSMUSG00000004221:ENSMUST00000130802:exon2:c.T93G:p.S31S,ENSMUSG00000004221:ENSMUST00000135165:exon2:c.T93G:p.S31S,ENSMUSG00000004221:ENSMUST00000138564:exon2:c.T111G:p.S37S,ENSMUSG00000004221:ENSMUST00000149525:exon2:c.T12…	XqA7.3	NA	NA	+	GTGAAGAATCTTCTCTGGGGA	chrX	74432912	ATCxTCT	T	G	67_S4_L001_R1_001	64_Jiri_S1_L001_R1_001	0	NOVEL	COVERED	0.888875	0.888875	1	1	0.999974	79	0	31.5164	32.0635	8.26633	27.2602	0.375	0.02	-0.359044
ACR_1	chrX	161841220	161841220	T	A	exonic	Nhs	NA	nonsynonymous SNV	Nhs:NM_001081052:exon6:c.A3132T:p.L1044F,Nhs:NM_001290526:exon7:c.A3195T:p.L1065F	exonic	Nhs	NA	nonsynonymous SNV	Nhs:uc009uuc.1:exon6:c.A3132T:p.L1044F,Nhs:uc012hrh.1:exon7:c.A3195T:p.L1065F	exonic	ENSMUSG00000059493	NA	nonsynonymous SNV	ENSMUSG00000059493:ENSMUST00000081569:exon6:c.A3132T:p.L1044F,ENSMUSG00000059493:ENSMUST00000087085:exon7:c.A3195T:p.L1065F	XqF4	NA	NA	-	CACCATCTTTTAAAGATGGCT	chrX	161841220	TTTxAAA	T	A	67_S4_L001_R1_001	70_S7_L001_R1_001	0	NOVEL	COVERED	0.92664	0.92664	1	1	1	103	0	4.32475	10.2003	5.06959	4.90067	0.133333	0.02	-0.394487
ACR_1	chrX	153686302	153686302	C	T	UTR3	Kctd12b	NM_175429:c.*2511G>A	NA	NA	UTR3	Kctd12b	uc009uqy.1:c.*2511G>A,uc009uqz.1:c.*2511G>A	NA	NA	UTR3	ENSMUSG00000041633	ENSMUST00000039424:c.*2511G>A,ENSMUST00000112572:c.*2511G>A	NA	NA	XqF3	NA	NA	-	TTTTTTTTTTCTTAAAAAAGT	chrX	153686302	TTTxTTA	C	T	67_S4_L001_R1_001	E210_S1	0	NOVEL	COVERED	0.987814	0.987943	0.999869	0.999869	0.984784	81	0	4.01197	8.6917	8.86473	0	0.183673	0.02	0.980812
ACR_2	chr1	34190873	34190873	T	G	exonic	Dst	NA	nonsynonymous SNV	Dst:NM_134448:exon36:c.T7546G:p.L2516V,Dst:NM_001276764:exon39:c.T8080G:p.L2694V	exonic	Dst	NA	nonsynonymous SNV	Dst:uc007aoi.2:exon36:c.T7546G:p.L2516V,Dst:uc007aon.2:exon39:c.T8080G:p.L2694V	exonic	ENSMUSG00000026131	NA	nonsynonymous SNV	ENSMUSG00000026131:ENSMUST00000097785:exon36:c.T7546G:p.L2516V,ENSMUSG00000026131:ENSMUST00000115104:exon36:c.T7546G:p.L2516V,ENSMUSG00000026131:ENSMUST00000183034:exon39:c.T8080G:p.L2694V	1qB	NA	NA	+	GAAAGAGAGGTTAGGAGCTTC	chr1	34190873	AGGxTAG	T	G	68_S5_L001_R1_001	64_Jiri_S1_L001_R1_001	0	NOVEL	COVERED	0.976865	0.976865	1	1	1	124	0	64.7121	64.716	27.3103	53.911	0.490909	0.02	1.11551
ACR_2	chr1	37175536	37175536	C	T	intergenic	Tmem131,Cnga3	dist=236009;dist=42742	NA	NA	ncRNA_exonic	4921511C04Rik	NA	NA	NA	exonic	ENSMUSG00000026115	NA	synonymous SNV	ENSMUSG00000026115:ENSMUST00000027289:exon6:c.C564T:p.V188V	1qB	NA	NA	NA	ACGCCTTGGTCGACTTCAGGT	chr1	37175536	GGTxGAC	C	T	68_S5_L001_R1_001	64_Jiri_S1_L001_R1_001	0	NOVEL	COVERED	0.877705	0.877708	0.999997	0.999997	0.999646	70	0	19.3208	21.5359	14.9751	10.3645	0.25	0.02	-0.348807
ACR_2	chr1	60295939	60295939	A	C	exonic	Nbeal1	NA	nonsynonymous SNV	Nbeal1:NM_173444:exon46:c.A6877C:p.I2293L	exonic	Nbeal1	NA	nonsynonymous SNV	Nbeal1:uc011wly.1:exon9:c.A670C:p.I224L,Nbeal1:uc007bej.1:exon46:c.A6877C:p.I2293L	exonic	ENSMUSG00000073664	NA	nonsynonymous SNV	ENSMUSG00000073664:ENSMUST00000160834:exon45:c.A6877C:p.I2293L,ENSMUSG00000073664:ENSMUST00000035569:exon46:c.A6877C:p.I2293L	1qC2	NA	NA	+	CAAAACAGAAATTTCAACCCT	chr1	60295939	GAAxTTT	A	C	68_S5_L001_R1_001	64_Jiri_S1_L001_R1_001	0	NOVEL	COVERED	0.976865	0.976865	1	1	1	118	0	49.3779	50.0448	23.8853	31.7813	0.381818	0.02	1.11551
ACR_2	chr1	91847788	91847788	A	C	UTR3	Twist2	NM_007855:c.*440A>C	NA	NA	UTR3	Twist2	uc007cbd.1:c.*440A>C	NA	NA	UTR3	ENSMUSG00000007805	ENSMUST00000007949:c.*440A>C	NA	NA	1qD	NA	NA	+	CAGAACAAGAACCCAAGATCC	chr1	91847788	AGAxCCC	A	C	68_S5_L001_R1_001	64_Jiri_S1_L001_R1_001	0	NOVEL	COVERED	1	1	1	1	1	325	0	106.946	112.355	63.3717	60.4273	0.311765	0.02	3.30361
ACR_2	chr1	127390716	127390716	C	T	intronic	Mgat5	NA	NA	NA	intronic	Mgat5	NA	NA	NA	intronic	ENSMUSG00000036155	NA	NA	NA	1qE3	NA	NA	+	TTTTTTTTTTCTTTTCTTCTC	chr1	127390716	TTTxTTT	C	T	68_S5_L001_R1_001	64_Jiri_S1_L001_R1_001	0	NOVEL	COVERED	0.457755	0.457757	0.999997	0.999997	0.999646	52	0	4.97926	7.00469	7.5127	0	0.181818	0.02	-0.190917
ACR_2	chr1	134740888	134740888	G	T	exonic	Syt2	NA	nonsynonymous SNV	Syt2:NM_009307:exon3:c.G37T:p.V13L	exonic	Syt2	NA	nonsynonymous SNV	Syt2:uc007csi.1:exon2:c.G37T:p.V13L,Syt2:uc007csk.1:exon2:c.G37T:p.V13L,Syt2:uc007csj.1:exon3:c.G37T:p.V13L	exonic	ENSMUSG00000026452	NA	nonsynonymous SNV	ENSMUSG00000026452:ENSMUST00000121990:exon2:c.G37T:p.V13L	1qE4	NA	NA	+	GGAGCCAAATGTGGCTCCGGC	chr1	134740888	AATxTGG	G	T	68_S5_L001_R1_001	E210_S1	0	NOVEL	COVERED	0.888875	0.888875	1	1	0.999992	80	0	-0.020314	6.62701	5.2101	1.41615	0.097561	0.02	-0.359366
ACR_2	chr1	136628525	136628525	A	G	UTR3	Zfp281	NM_001160251:c.*558A>G,NM_177643:c.*558A>G	NA	NA	UTR3	Zfp281	uc007cuw.2:c.*558A>G,uc007cux.2:c.*558A>G	NA	NA	UTR3	ENSMUSG00000041483	ENSMUST00000047734:c.*558A>G,ENSMUST00000112046:c.*558A>G	NA	NA	1qE4	NA	NA	+	ACATTTCATCATTTAAGTAAG	chr1	136628525	ATCxTTT	A	G	68_S5_L001_R1_001	64_Jiri_S1_L001_R1_001	0	NOVEL	COVERED	1	1	1	1	1	521	0	76.219	90.3109	44.3587	46.2476	0.237668	0.02	3.64183
ACR_2	chr1	155847895	155847895	G	T	UTR3	Cep350	NM_001039184:c.*668C>A	NA	NA	UTR3	Cep350	uc007dbr.1:c.*668C>A,uc007dbs.2:c.*668C>A	NA	NA	UTR3	ENSMUSG00000033671	ENSMUST00000138762:c.*668C>A	NA	NA	1qG3	NA	NA	-	ACTGGGTTCTGCCCAGACAGG	chr1	155847895	TCTxCCC	G	T	68_S5_L001_R1_001	64_Jiri_S1_L001_R1_001	0	NOVEL	COVERED	0.948402	0.948402	1	1	0.999994	91	0	-1.98088	6.44614	5.25348	1.39872	0.083333	0.02	-0.419786
ACR_2	chr1	162704585	162704585	T	C	exonic	Prrc2c	NA	nonsynonymous SNV	Prrc2c:NM_001081290:exon16:c.A4460G:p.K1487R	exonic	Prrc2c	NA	nonsynonymous SNV	Prrc2c:uc007dgr.1:exon16:c.A4460G:p.K1487R,Prrc2c:uc007dgs.1:exon16:c.A4454G:p.K1485R	exonic	ENSMUSG00000040225	NA	nonsynonymous SNV	ENSMUSG00000040225:ENSMUST00000182393:exon1:c.A608G:p.K203R,ENSMUSG00000040225:ENSMUST00000183223:exon1:c.A182G:p.K61R,ENSMUSG00000040225:ENSMUST00000028016:exon16:c.A4454G:p.K1485R,ENSMUSG00000040225:ENSMUST00000182149:exon16:c.A4460G:p.K1487R,ENSMUSG00000040225:ENSMUST00000182593:exon16:c.A4454G:p.K1485R,ENSMUSG00000040225:ENSMUST00000182660:exon16:c.A4460G:p.K1487R	1qH2.1	NA	NA	-	ATCAGCATTTTTCTTCTCGTC	chr1	162704585	TTTxTCT	T	C	68_S5_L001_R1_001	64_Jiri_S1_L001_R1_001	0	NOVEL	COVERED	0.999998	0.999998	1	1	1	221	0	-2.76569	17.3056	10.3912	10.1282	0.086207	0.02	2.17003
ACR_2	chr1	169743064	169743064	A	T	UTR3	Rgs4	NM_009062:c.*617T>A	NA	NA	UTR3	Rgs4	uc007dln.1:c.*617T>A	NA	NA	UTR3	ENSMUSG00000038530	ENSMUST00000027991:c.*617T>A,ENSMUST00000111357:c.*786T>A	NA	NA	1qH2.3	NA	NA	-	CAGAACATGCATGCAAGCATG	chr1	169743064	TGCxTGC	A	T	68_S5_L001_R1_001	64_Jiri_S1_L001_R1_001	0	NOVEL	COVERED	0.78106	0.78106	1	1	1	85	0	1.98027	6.86865	1.55635	5.2312	0.117647	0.02	-0.298076
ACR_2	chr1	171282661	171282661	G	A	intronic	Usp21	NA	NA	NA	intronic	Usp21	NA	NA	NA	intronic	ENSMUSG00000053483	NA	NA	NA	1qH3	NA	NA	-	TCTCCCTCCTGAAGATTCTTT	chr1	171282661	CCTxAAG	G	A	68_S5_L001_R1_001	E210_S1	0	NOVEL	COVERED	0.99994	0.99994	1	1	1	183	0	-10.7096	8.35489	4.49026	3.73841	0.0625	0.02	0.555479
ACR_2	chr1	171282666	171282666	T	A	intronic	Usp21	NA	NA	NA	intronic	Usp21	NA	NA	NA	intronic	ENSMUSG00000053483	NA	NA	NA	1qH3	NA	NA	-	CTCCTGAAGATTCTTTAGGAG	chr1	171282666	AGAxTCT	T	A	68_S5_L001_R1_001	E210_S1	0	NOVEL	COVERED	0.99994	0.99994	1	1	1	187	0	-10.6237	8.45325	4.49016	3.83558	0.0625	0.02	0.651664
ACR_2	chr1	177023661	177023661	T	A	UTR3	Akt3	NM_011785:c.*1703A>T	NA	NA	UTR3	Akt3	uc007duk.2:c.*1703A>T	NA	NA	UTR3	ENSMUSG00000019699	ENSMUST00000111160:c.*1703A>T,ENSMUST00000111159:c.*1703A>T	NA	NA	1qH4	NA	NA	-	TGTGTCACACTGTGGTCTTCC	chr1	177023661	CACxGTG	T	A	68_S5_L001_R1_001	64_Jiri_S1_L001_R1_001	0	NOVEL	COVERED	0.800244	0.800245	0.999998	0.999998	0.999725	68	0	1.37888	6.51666	5.77425	1.1812	0.114286	0.02	-0.306842
ACR_2	chr2	12356971	12356971	C	G	exonic	Fam188a	NA	nonsynonymous SNV	Fam188a:NM_024185:exon12:c.G959C:p.G320A	exonic	Fam188a	NA	nonsynonymous SNV	Fam188a:uc008ijq.1:exon10:c.G443C:p.G148A,Fam188a:uc008ijp.1:exon11:c.G443C:p.G148A,Fam188a:uc008ijn.1:exon12:c.G959C:p.G320A,Fam188a:uc008ijo.1:exon12:c.G443C:p.G148A,Fam188a:uc008ijr.1:exon12:c.G959C:p.G320A	exonic	ENSMUSG00000026767	NA	nonsynonymous SNV	ENSMUSG00000026767:ENSMUST00000154899:exon7:c.G236C:p.G79A,ENSMUSG00000026767:ENSMUST00000028105:exon12:c.G959C:p.G320A	2qA1	NA	NA	-	AGCTATGAATCCATTATCTGA	chr2	12356971	AATxCAT	C	G	68_S5_L001_R1_001	64_Jiri_S1_L001_R1_001	0	NOVEL	COVERED	1	1	1	1	1	510	0	228.302	229.595	153.001	150.627	0.419913	0.02	4.34835
ACR_2	chr2	27171454	27171454	G	A	exonic	Dbh	NA	nonsynonymous SNV	Dbh:NM_138942:exon4:c.G899A:p.R300Q	exonic	Dbh	NA	nonsynonymous SNV	Dbh:uc008ixe.1:exon4:c.G899A:p.R300Q	exonic	ENSMUSG00000000889	NA	nonsynonymous SNV	ENSMUSG00000000889:ENSMUST00000000910:exon4:c.G899A:p.R300Q	2qA3	NA	NA	+	AACTACTGCCGGCACGTGCTG	chr2	27171454	GCCxGCA	G	A	68_S5_L001_R1_001	64_Jiri_S1_L001_R1_001	0	NOVEL	COVERED	0.899314	0.899314	1	1	0.999995	87	0	0.207282	6.82908	3.41013	7.29148	0.097561	0.02	-0.36757
ACR_2	chr2	28039414	28039414	T	C	UTR3	Col5a1	NM_015734:c.*2398T>C	NA	NA	UTR3	Col5a1	uc008ixt.2:c.*2398T>C	NA	NA	UTR3	ENSMUSG00000026837	ENSMUST00000028280:c.*2398T>C	NA	NA	2qA3	NA	NA	+	GATTTTAACTTCTCCCCAGGA	chr2	28039414	ACTxCTC	T	C	68_S5_L001_R1_001	70_S7_L001_R1_001	0	NOVEL	COVERED	1	1	1	1	1	1440	0	-40.6084	76.3624	47.421	46.9311	0.076923	0.02	13.6516
ACR_2	chr2	33246910	33246910	T	G	UTR3	Angptl2	NM_011923:c.*624T>G	NA	NA	ncRNA_exonic	AK196015	NA	NA	NA	UTR3	ENSMUSG00000004105	ENSMUST00000004208:c.*624T>G	NA	NA	2qB	NA	NA	+	CTCCGTACAGTTACCCCTCAG	chr2	33246910	CAGxTAC	T	G	68_S5_L001_R1_001	64_Jiri_S1_L001_R1_001	0	NOVEL	COVERED	0.97082	0.97082	1	1	0.999994	96	0	27.4316	29.4198	11.9757	19.3298	0.294118	0.02	1.13365
ACR_2	chr2	35729455	35729455	T	A	UTR3	Dab2ip	NM_001114125:c.*335T>A,NM_001290641:c.*1230T>A,NM_001114124:c.*1230T>A,NM_001290640:c.*1230T>A,NM_001001602:c.*1230T>A,NM_001290639:c.*1230T>A	NA	NA	UTR3	Dab2ip	uc008jkx.2:c.*335T>A,uc008jks.2:c.*1230T>A,uc008jkr.2:c.*1230T>A,uc008jkt.2:c.*1230T>A,uc008jku.2:c.*1230T>A,uc008jkw.1:c.*335T>A,uc008jkv.2:c.*1230T>A	NA	NA	UTR3	ENSMUSG00000026883	ENSMUST00000112986:c.*335T>A,ENSMUST00000112987:c.*1230T>A,ENSMUST00000145698:c.*4441T>A,ENSMUST00000091010:c.*1230T>A,ENSMUST00000112992:c.*1230T>A,ENSMUST00000112981:c.*4387T>A,ENSMUST00000065001:c.*1230T>A,ENSMUST00000112983:c.*1230T>A,ENSMUST00000156669:c.*335T>A	NA	NA	2qB	NA	NA	+	CCCCATCTGTTCCCACACTCT	chr2	35729455	TGTxCCC	T	A	68_S5_L001_R1_001	64_Jiri_S1_L001_R1_001	0	NOVEL	COVERED	1	1	1	1	1	352	0	10.8146	31.1824	10.6384	20.9825	0.126667	0.02	3.08204
ACR_2	chr2	65766970	65766970	A	T	UTR3	Scn2a1	NM_001099298:c.*2141A>T	NA	NA	UTR3	Scn2a1	uc008jwo.2:c.*2141A>T	NA	NA	UTR3	ENSMUSG00000075318	ENSMUST00000028377:c.*2141A>T,ENSMUST00000100067:c.*2141A>T	NA	NA	2qC1.3	NA	NA	+	TCTTTCTCTCACTGTTTTCCA	chr2	65766970	CTCxCTG	A	T	68_S5_L001_R1_001	E210_S1	0	NOVEL	COVERED	1	1	1	1	1	178	0	0.066413	14.0865	15.374	0	0.137615	0.02	1.918
ACR_2	chr2	68267041	68267041	C	G	exonic	Stk39	NA	nonsynonymous SNV	Stk39:NM_016866:exon15:c.G1460C:p.R487T	exonic	Stk39	NA	nonsynonymous SNV	Stk39:uc008jxn.1:exon8:c.G731C:p.R244T,Stk39:uc029txy.1:exon11:c.G710C:p.R237T,Stk39:uc008jxo.1:exon15:c.G1460C:p.R487T,Stk39:uc008jxp.1:exon15:c.G1460C:p.R487T	exonic	ENSMUSG00000027030	NA	nonsynonymous SNV	ENSMUSG00000027030:ENSMUST00000102715:exon15:c.G1460C:p.R487T	2qC1.3	NA	NA	-	AAACTTGCCTCTTCCTGGAGT	chr2	68267041	CCTxTTC	C	G	68_S5_L001_R1_001	64_Jiri_S1_L001_R1_001	0	NOVEL	COVERED	1	1	1	1	1	329	0	67.2646	78.684	55.0276	39.7215	0.229412	0.02	3.27679
ACR_2	chr2	76878381	76878381	T	A	exonic	Ttn	NA	nonsynonymous SNV	Ttn:NM_011652:exon92:c.A23744T:p.K7915I	exonic	Ttn	NA	nonsynonymous SNV	Ttn:uc008kfn.1:exon92:c.A23744T:p.K7915I	exonic	ENSMUSG00000051747	NA	nonsynonymous SNV	ENSMUSG00000051747:ENSMUST00000148747:exon20:c.A5471T:p.K1824I,ENSMUSG00000051747:ENSMUST00000134720:exon50:c.A13757T:p.K4586I,ENSMUSG00000051747:ENSMUST00000111846:exon91:c.A23744T:p.K7915I,ENSMUSG00000051747:ENSMUST00000111882:exon92:c.A23744T:p.K7915I,ENSMUSG00000051747:ENSMUST00000099981:exon93:c.A26426T:p.K8809I	2qC3	NA	NA	-	GATGGCTGATTTTTCAGTTGT	chr2	76878381	GATxTTT	T	A	68_S5_L001_R1_001	64_Jiri_S1_L001_R1_001	0	NOVEL	COVERED	0.992092	0.992094	0.999998	0.999998	0.999763	97	0	15.1646	20.8346	15.2088	9.74117	0.190476	0.02	0.948445
ACR_2	chr2	91015497	91015497	G	C	UTR3	Celf1	NM_001244903:c.*2044G>C,NM_001244891:c.*2044G>C	NA	NA	UTR3	Celf1	uc008kty.2:c.*2044G>C,uc008ktz.2:c.*2044G>C	NA	NA	UTR3	ENSMUSG00000005506	ENSMUST00000068726:c.*2132G>C,ENSMUST00000177642:c.*2044G>C,ENSMUST00000068747:c.*2044G>C,ENSMUST00000111452:c.*2132G>C,ENSMUST00000111455:c.*2044G>C	NA	NA	2qE1	NA	NA	+	CTGTGAATTGGCAGAGGCGAG	chr2	91015497	TTGxCAG	G	C	68_S5_L001_R1_001	64_Jiri_S1_L001_R1_001	0	NOVEL	COVERED	1	1	1	1	1	422	0	13.5231	43.3495	7.64222	39.5964	0.119617	0.02	4.51556
ACR_2	chr2	91513476	91513476	A	T	UTR3	Lrp4	NM_172668:c.*1715A>T	NA	NA	UTR3	Lrp4	uc008kvx.2:c.*1715A>T	NA	NA	UTR3	ENSMUSG00000027253	ENSMUST00000028689:c.*1715A>T	NA	NA	2qE1	NA	NA	+	GAGCAGGCCAATGGCCTTTTC	chr2	91513476	CCAxTGG	A	T	68_S5_L001_R1_001	64_Jiri_S1_L001_R1_001	0	NOVEL	COVERED	0.997898	0.997898	1	1	1	149	0	-2.79541	9.82024	4.19436	5.8029	0.083333	0.02	0.862036
ACR_2	chr2	93334346	93334346	T	C	UTR5	Tspan18	NM_183180:c.-111572A>G	NA	NA	UTR5	Tspan18	uc012bzr.1:c.-111572A>G	NA	NA	UTR5	ENSMUSG00000027217	ENSMUST00000111265:c.-111572A>G	NA	NA	2qE1	NA	NA	-	GCACCGGTAGTCCTGCGCCGC	chr2	93334346	TAGxCCT	T	C	68_S5_L001_R1_001	70_S7_L001_R1_001	0	NOVEL	COVERED	0.78106	0.78106	1	1	1	87	0	2.10981	6.73065	0	7.03636	0.121212	0.02	-0.297437
ACR_2	chr2	93334349	93334349	T	A	UTR5	Tspan18	NM_183180:c.-111575A>T	NA	NA	UTR5	Tspan18	uc012bzr.1:c.-111575A>T	NA	NA	UTR5	ENSMUSG00000027217	ENSMUST00000111265:c.-111575A>T	NA	NA	2qE1	NA	NA	-	CCGGTAGTCCTGCGCCGCGGC	chr2	93334349	TCCxGCG	T	A	68_S5_L001_R1_001	64_Jiri_S1_L001_R1_001	0	NOVEL	COVERED	0.78106	0.78106	1	1	0.999912	71	0	2.59548	7.2242	0	7.52988	0.121212	0.02	-0.297794
ACR_2	chr2	118125347	118125347	C	G	UTR3	Thbs1	NM_011580:c.*318C>G	NA	NA	UTR3	Thbs1	uc008lrq.1:c.*318C>G,uc008lrr.1:c.*318C>G	NA	NA	UTR3	ENSMUSG00000040152	ENSMUST00000039559:c.*318C>G	NA	NA	2qE5	NA	NA	+	ACTCACAGAGCCAGAACTTCT	chr2	118125347	GAGxCAG	C	G	68_S5_L001_R1_001	64_Jiri_S1_L001_R1_001	0	NOVEL	COVERED	0.998867	0.998867	1	1	1	147	0	52.7151	55.1237	35.7807	31.4148	0.311688	0.02	0.923125
ACR_2	chr2	120590613	120590613	A	G	intronic	Snap23	NA	NA	NA	intronic	Snap23	NA	NA	NA	intronic	ENSMUSG00000027287	NA	NA	NA	2qE5	NA	NA	+	CTCAGGAAAAATAAAGTATGC	chr2	120590613	AAAxTAA	A	G	68_S5_L001_R1_001	64_Jiri_S1_L001_R1_001	0	NOVEL	COVERED	0.996724	0.996724	1	1	1	136	0	1.29511	11.9677	4.98463	10.7995	0.102941	0.02	0.992817
ACR_2	chr2	131179399	131179399	C	G	exonic	Cenpb	NA	nonsynonymous SNV	Cenpb:NM_007682:exon1:c.G478C:p.V160L	exonic	Cenpb	NA	nonsynonymous SNV	Cenpb:uc008mkx.1:exon1:c.G478C:p.V160L	exonic	ENSMUSG00000068267	NA	nonsynonymous SNV	ENSMUSG00000068267:ENSMUST00000089510:exon1:c.G478C:p.V160L	2qF1	NA	NA	-	TCGGAGGGCACCGTGGCTGGG	chr2	131179399	GCAxCGT	C	G	68_S5_L001_R1_001	64_Jiri_S1_L001_R1_001	0	NOVEL	UNCOVERED	0.119541	0.120436	0.99257	0.99257	0	19	0	6.12181	6.63319	6.77933	0	0.272727	0.02	-0.096419
ACR_2	chr2	131297093	131297093	G	C	ncRNA_intronic	Mir3098	NA	NA	NA	ncRNA_intronic	Mir3098	NA	NA	NA	UTR3	ENSMUSG00000037514	ENSMUST00000150843:c.*770G>C,ENSMUST00000184932:c.*1057G>C	NA	NA	2qF1	NA	NA	-	CATTGTGCTGGCAGCACAGTA	chr2	131297093	CTGxCAG	G	C	68_S5_L001_R1_001	E210_S1	0	NOVEL	COVERED	0.934489	0.934492	0.999997	0.999997	0.999646	76	0	-1.32495	6.61767	3.13446	3.17035	0.086957	0.02	-0.403236
ACR_2	chr2	141810561	141810561	T	C	intronic	Macrod2	NA	NA	NA	intronic	Macrod2	NA	NA	NA	intronic	ENSMUSG00000068205	NA	NA	NA	2qG1	NA	NA	+	CTCGTTTTATTCATCTGCTTT	chr2	141810561	TATxCAT	T	C	68_S5_L001_R1_001	64_Jiri_S1_L001_R1_001	0	NOVEL	COVERED	0.487421	0.490544	0.993634	0.993634	0	35	0	9.56649	11.0671	11.4314	0	0.227273	0.02	-0.201554
ACR_2	chr2	148754623	148754623	A	T	exonic	Cstl1	NA	nonsynonymous SNV	Cstl1:NM_177655:exon3:c.A245T:p.E82V	exonic	Cstl1	NA	nonsynonymous SNV	Cstl1:uc008mtj.1:exon3:c.A245T:p.E82V,Cstl1:uc008mtk.1:exon3:c.A89T:p.E30V	exonic	ENSMUSG00000055177	NA	nonsynonymous SNV	ENSMUSG00000055177:ENSMUST00000109952:exon3:c.A245T:p.E82V,ENSMUSG00000055177:ENSMUST00000109954:exon3:c.A89T:p.E30V,ENSMUSG00000055177:ENSMUST00000109955:exon3:c.A245T:p.E82V	2qG3	NA	NA	+	ACAGGGGTGGAGTATTTGGTT	chr2	148754623	TGGxGTA	A	T	68_S5_L001_R1_001	64_Jiri_S1_L001_R1_001	0	NOVEL	UNCOVERED	0.099162	0.099721	0.994391	0.994391	0	23	0	9.59728	9.68482	2.10052	10.1988	0.4	0.02	-0.087682
ACR_2	chr2	178337391	178337391	T	G	UTR3	Phactr3	NM_001177790:c.*1870T>G,NM_001177789:c.*1870T>G,NM_028806:c.*1870T>G,NM_001177791:c.*1870T>G,NM_001007154:c.*1870T>G	NA	NA	UTR3	Phactr3	uc012cls.1:c.*1870T>G,uc008ohj.2:c.*1870T>G,uc008ohk.2:c.*1870T>G,uc008ohl.2:c.*1870T>G,uc008ohm.2:c.*1870T>G	NA	NA	UTR3	ENSMUSG00000027525	ENSMUST00000108917:c.*1870T>G	NA	NA	2qH4	NA	NA	+	TGAAAAAAACTTAAGGTAAAT	chr2	178337391	AACxTAA	T	G	68_S5_L001_R1_001	64_Jiri_S1_L001_R1_001	0	NOVEL	COVERED	1	1	1	1	1	599	0	293.149	293.47	202.768	115.195	0.466877	0.02	5.61987
ACR_2	chr2	181688717	181688717	T	C	exonic	Rgs19	NA	nonsynonymous SNV	Rgs19:NM_001291209:exon6:c.A464G:p.K155R	UTR3	Rgs19	uc008onc.1:c.*390A>G,uc008ond.1:c.*390A>G,uc008one.1:c.*390A>G,uc008onf.1:c.*390A>G,uc008ong.1:c.*639A>G	NA	NA	exonic	ENSMUSG00000002458	NA	unknown	UNKNOWN	2qH4	NA	NA	-	AAACAGAGGCTTCTGTTTTTA	chr2	181688717	GGCxTCT	T	C	68_S5_L001_R1_001	64_Jiri_S1_L001_R1_001	0	NOVEL	COVERED	0.999995	0.999995	1	1	1	212	0	-11.4351	10.3566	5.43634	4.85595	0.063636	0.02	2.0183
ACR_2	chr3	38979753	38979753	A	C	exonic	Fat4	NA	nonsynonymous SNV	Fat4:NM_183221:exon9:c.A7553C:p.D2518A	exonic	Fat4	NA	nonsynonymous SNV	Fat4:uc008pbf.1:exon9:c.A7553C:p.D2518A	exonic	ENSMUSG00000046743	NA	nonsynonymous SNV	ENSMUSG00000046743:ENSMUST00000061260:exon9:c.A7553C:p.D2518A	3qB	NA	NA	+	TTTCACATTGACCCCCTGAGG	chr3	38979753	TTGxCCC	A	C	68_S5_L001_R1_001	64_Jiri_S1_L001_R1_001	0	NOVEL	COVERED	0.986153	0.986153	1	1	1	122	0	-0.835293	8.72435	4.73451	9.79848	0.101695	0.02	1.08163
ACR_2	chr3	38979760	38979760	G	C	exonic	Fat4	NA	synonymous SNV	Fat4:NM_183221:exon9:c.G7560C:p.L2520L	exonic	Fat4	NA	synonymous SNV	Fat4:uc008pbf.1:exon9:c.G7560C:p.L2520L	exonic	ENSMUSG00000046743	NA	synonymous SNV	ENSMUSG00000046743:ENSMUST00000061260:exon9:c.G7560C:p.L2520L	3qB	NA	NA	+	TTGACCCCCTGAGGGGGGCAA	chr3	38979760	CCTxAGG	G	C	68_S5_L001_R1_001	64_Jiri_S1_L001_R1_001	0	NOVEL	COVERED	0.993703	0.993703	1	1	1	125	0	4.45716	13.344	9.98378	9.76294	0.125	0.02	1.0291
ACR_2	chr3	51664497	51664497	C	A	intronic	Mgst2	NA	NA	NA	intronic	Mgst2	NA	NA	NA	intronic	ENSMUSG00000074604	NA	NA	NA	3qC	NA	NA	+	ACACGACATTCCGGTCCCTTG	chr3	51664497	ATTxCGG	C	A	68_S5_L001_R1_001	64_Jiri_S1_L001_R1_001	0	NOVEL	COVERED	0.888875	0.888875	1	1	0.999999	89	0	11.1954	14.5468	10.4708	7.78456	0.2	0.02	-0.358561
ACR_2	chr3	84958543	84958543	T	A	exonic	Fbxw7	NA	synonymous SNV	Fbxw7:NM_080428:exon3:c.T390A:p.T130T,Fbxw7:NM_001177774:exon5:c.T633A:p.T211T,Fbxw7:NM_001177773:exon6:c.T633A:p.T211T	exonic	Fbxw7	NA	synonymous SNV	Fbxw7:uc008pql.2:exon3:c.T390A:p.T130T,Fbxw7:uc008pqn.2:exon5:c.T633A:p.T211T,Fbxw7:uc008pqk.2:exon6:c.T633A:p.T211T	exonic	ENSMUSG00000028086	NA	synonymous SNV	ENSMUSG00000028086:ENSMUST00000029727:exon3:c.T390A:p.T130T,ENSMUSG00000028086:ENSMUST00000107675:exon3:c.T270A:p.T90T,ENSMUSG00000028086:ENSMUST00000107678:exon5:c.T633A:p.T211T,ENSMUSG00000028086:ENSMUST00000107679:exon6:c.T633A:p.T211T	3qF1	NA	NA	+	CACCAACAACTTTTGGGGACC	chr3	84958543	AACxTTT	T	A	68_S5_L001_R1_001	64_Jiri_S1_L001_R1_001	0	NOVEL	COVERED	1	1	1	1	1	321	0	-30.7791	9.25263	5.5917	5.01259	0.044444	0.02	2.71222
ACR_2	chr3	89244279	89244279	A	T	exonic	Trim46	NA	nonsynonymous SNV	Trim46:NM_001039466:exon2:c.T157A:p.Y53N,Trim46:NM_183037:exon2:c.T196A:p.Y66N	exonic	Trim46	NA	nonsynonymous SNV	Trim46:uc008pyj.1:exon2:c.T157A:p.Y53N,Trim46:uc008pyk.1:exon2:c.T196A:p.Y66N	exonic	ENSMUSG00000042766	NA	nonsynonymous SNV	ENSMUSG00000042766:ENSMUST00000041022:exon2:c.T196A:p.Y66N,ENSMUSG00000042766:ENSMUST00000090924:exon2:c.T157A:p.Y53N,ENSMUSG00000042766:ENSMUST00000107464:exon2:c.T127A:p.Y43N,ENSMUSG00000042766:ENSMUST00000143637:exon2:c.T196A:p.Y66N	3qF1	NA	NA	-	TGGCCTATGTACCCCTGCTGG	chr3	89244279	TGTxCCC	A	T	68_S5_L001_R1_001	64_Jiri_S1_L001_R1_001	0	NOVEL	COVERED	1	1	1	1	1	516	0	112.529	129.619	21.4541	122.431	0.238095	0.02	5.15586
ACR_2	chr3	89337918	89337918	G	C	exonic	Efna4	NA	synonymous SNV	Efna4:NM_007910:exon1:c.C33G:p.L11L	exonic	Efna4	NA	synonymous SNV	Efna4:uc008pys.1:exon1:c.C33G:p.L11L	exonic	ENSMUSG00000028040	NA	synonymous SNV	ENSMUSG00000028040:ENSMUST00000029674:exon1:c.C33G:p.L11L	3qF1	NA	NA	-	GCGCGGCCCAGAGCACAGTCC	chr3	89337918	CCAxAGC	G	C	68_S5_L001_R1_001	64_Jiri_S1_L001_R1_001	0	NOVEL	COVERED	0.999981	0.999981	1	1	1	223	0	44.3048	50.8076	22.914	40.7764	0.235294	0.02	2.2842
ACR_2	chr3	90254277	90254277	G	C	upstream;downstream	Crtc2;Slc39a1	NA	NA	NA	upstream;downstream	Crtc2;Slc39a1	NA	NA	NA	UTR5	ENSMUSG00000027936	ENSMUST00000029545:c.-129G>C	NA	NA	3qF1	NA	NA	NA	TCTGGAGTAGGCTGGGGCCGA	chr3	90254277	TAGxCTG	G	C	68_S5_L001_R1_001	64_Jiri_S1_L001_R1_001	0	NOVEL	COVERED	0.997898	0.997898	1	1	1	144	0	18.7312	25.7829	18.9142	14.2832	0.178082	0.02	0.959354
ACR_2	chr3	100034123	100034123	C	A	intronic	Spag17	NA	NA	NA	intronic	Spag17	NA	NA	NA	intronic	ENSMUSG00000027867	NA	NA	NA	3qF2.2	NA	NA	+	GAACAAAGCCCAAACACAACT	chr3	100034123	GCCxAAA	C	A	68_S5_L001_R1_001	64_Jiri_S1_L001_R1_001	0	NOVEL	COVERED	0.818462	0.818465	0.999997	0.999997	0.999646	66	0	7.93782	11.7255	5.60974	8.38181	0.166667	0.02	-0.315492
ACR_2	chr4	5799329	5799329	G	C	exonic	Fam110b	NA	nonsynonymous SNV	Fam110b:NM_173426:exon3:c.G746C:p.R249T	exonic	Fam110b	NA	nonsynonymous SNV	Fam110b:uc033ial.1:exon1:c.G746C:p.R249T,Fam110b:uc008rxi.1:exon2:c.G746C:p.R249T,Fam110b:uc008rxe.1:exon3:c.G746C:p.R249T,Fam110b:uc008rxh.1:exon3:c.G746C:p.R249T	exonic	ENSMUSG00000049119	NA	nonsynonymous SNV	ENSMUSG00000049119:ENSMUST00000171403:exon2:c.G746C:p.R249T,ENSMUSG00000049119:ENSMUST00000054857:exon3:c.G746C:p.R249T,ENSMUSG00000049119:ENSMUST00000108380:exon3:c.G746C:p.R249T	4qA1	NA	NA	+	GTCAGCCGGAGACCTTCCCTT	chr4	5799329	GGAxACC	G	C	68_S5_L001_R1_001	64_Jiri_S1_L001_R1_001	0	NOVEL	COVERED	0.612381	0.612407	0.999957	0.999957	0.993897	53	0	8.79846	10.0284	3.39047	6.53292	0.26087	0.02	-0.236177
ACR_2	chr4	8607638	8607638	C	G	UTR3	Rab2a	NM_021518:c.*1135C>G	NA	NA	UTR3	Rab2a	uc008rxw.1:c.*1135C>G	NA	NA	UTR3	ENSMUSG00000047187	ENSMUST00000060232:c.*1135C>G	NA	NA	4qA1	NA	NA	+	GTGGTTTTATCCTCTCGTTTT	chr4	8607638	TATxCTC	C	G	68_S5_L001_R1_001	64_Jiri_S1_L001_R1_001	0	NOVEL	COVERED	1	1	1	1	1	996	0	308.368	327.079	141.902	269.661	0.296443	0.02	11.6981
ACR_2	chr4	59219582	59219582	A	T	exonic	Ugcg	NA	synonymous SNV	Ugcg:NM_011673:exon8:c.A918T:p.A306A	exonic	Ugcg	NA	synonymous SNV	Ugcg:uc008szs.1:exon8:c.A918T:p.A306A	exonic	ENSMUSG00000028381	NA	synonymous SNV	ENSMUSG00000028381:ENSMUST00000030074:exon8:c.A918T:p.A306A	4qB3	NA	NA	+	TTGGGTGGGCAGCCCACCATG	chr4	59219582	GGCxGCC	A	T	68_S5_L001_R1_001	64_Jiri_S1_L001_R1_001	0	NOVEL	COVERED	0.717266	0.717315	0.999931	0.999931	0.991692	56	0	3.38844	7.53777	8.27137	3.44037	0.129032	0.02	-0.271678
ACR_2	chr4	62384127	62384127	A	G	intronic	Slc31a1	NA	NA	NA	intronic	Slc31a1	NA	NA	NA	UTR3	ENSMUSG00000066149	ENSMUST00000134727:c.*3296T>C	NA	NA	4qB3	NA	NA	+	TCAAAAGCATACACAGACTCG	chr4	62384127	CATxCAC	A	G	68_S5_L001_R1_001	64_Jiri_S1_L001_R1_001	0	NOVEL	COVERED	0.987943	0.987943	1	1	1	117	0	41.7085	43.2221	17.7962	28.5379	0.333333	0.02	1.07248
ACR_2	chr4	115862947	115862947	T	A	intronic	Mknk1	NA	NA	NA	intronic	Mknk1	NA	NA	NA	intronic	ENSMUSG00000028708	NA	NA	NA	4qD1	NA	NA	+	GGTCAGGTACTGTACCTGACC	chr4	115862947	TACxGTA	T	A	68_S5_L001_R1_001	64_Jiri_S1_L001_R1_001	0	NOVEL	COVERED	0.760787	0.760887	0.999869	0.999869	0.984784	54	0	2.38064	7.02297	7.16626	1.71594	0.121212	0.02	-0.289321
ACR_2	chr4	117123698	117123698	G	A	ncRNA_intronic	Btbd19	NA	NA	NA	intronic	Btbd19	NA	NA	NA	intronic	ENSMUSG00000073771	NA	NA	NA	4qD1	NA	NA	-	GAAAGGCAAGGGAGACAAGAT	chr4	117123698	AAGxGAG	G	A	68_S5_L001_R1_001	64_Jiri_S1_L001_R1_001	0	NOVEL	COVERED	0.800245	0.800245	1	1	0.999912	72	0	19.8205	21.2751	19.3873	6.53332	0.285714	0.02	-0.306648
ACR_2	chr4	137637754	137637754	G	T	intronic	Usp48	NA	NA	NA	intronic	Usp48	NA	NA	NA	intronic	ENSMUSG00000043411	NA	NA	NA	4qD3	NA	NA	+	TTTTTTTTTTGCACAGTATAG	chr4	137637754	TTTxCAC	G	T	68_S5_L001_R1_001	E210_S1	0	NOVEL	COVERED	0.948399	0.948402	0.999997	0.999997	0.999667	79	0	0.248468	6.70626	6.99967	0	0.12766	0.02	-0.418008
ACR_2	chr5	35706979	35706979	G	A	exonic	Sh3tc1	NA	synonymous SNV	Sh3tc1:NM_194344:exon12:c.C1863T:p.N621N	exonic	Sh3tc1	NA	synonymous SNV	Sh3tc1:uc012dvb.1:exon6:c.C813T:p.N271N,Sh3tc1:uc012dvc.1:exon10:c.C1623T:p.N541N,Sh3tc1:uc012dvd.1:exon10:c.C1281T:p.N427N,Sh3tc1:uc008xec.1:exon12:c.C1863T:p.N621N	exonic	ENSMUSG00000036553	NA	synonymous SNV	ENSMUSG00000036553:ENSMUST00000070203:exon12:c.C1863T:p.N621N	5qB3	NA	NA	-	ACTTCTCTGCGTTCTTCTGCT	chr5	35706979	TGCxTTC	G	A	68_S5_L001_R1_001	64_Jiri_S1_L001_R1_001	0	NOVEL	COVERED	0.290641	0.292001	0.995343	0.995343	0	31	0	18.9921	19.0066	14.0635	8.81493	0.533333	0.02	-0.148572
ACR_2	chr5	36003168	36003168	T	G	UTR3	Afap1	NM_027373:c.*3443T>G	NA	NA	UTR3	Afap1	uc008xej.1:c.*3443T>G	NA	NA	UTR3	ENSMUSG00000029094	ENSMUST00000064571:c.*3443T>G	NA	NA	5qB3	NA	NA	+	ATGGCCATGGTCCTGGCGTGG	chr5	36003168	TGGxCCT	T	G	68_S5_L001_R1_001	70_S7_L001_R1_001	0	NOVEL	COVERED	0.717315	0.717315	0.999999	0.999999	0.999855	67	0	5.76233	8.9283	9.45802	0	0.166667	0.02	-0.271383
ACR_2	chr5	36003169	36003169	C	G	UTR3	Afap1	NM_027373:c.*3444C>G	NA	NA	UTR3	Afap1	uc008xej.1:c.*3444C>G	NA	NA	UTR3	ENSMUSG00000029094	ENSMUST00000064571:c.*3444C>G	NA	NA	5qB3	NA	NA	+	TGGCCATGGTCCTGGCGTGGG	chr5	36003169	GGTxCTG	C	G	68_S5_L001_R1_001	70_S7_L001_R1_001	0	NOVEL	COVERED	0.760886	0.760887	0.999999	0.999999	0.999855	69	0	3.71072	7.42112	7.88891	0	0.15625	0.02	-0.288678
ACR_2	chr5	38203335	38203335	A	T	intronic	Zbtb49	NA	NA	NA	intronic	Zbtb49	NA	NA	NA	UTR3	ENSMUSG00000029127	ENSMUST00000146859:c.*12T>A	NA	NA	5qB3	NA	NA	-	CATCAGGATCAGTTCCTGATG	chr5	38203335	ATCxGTT	A	T	68_S5_L001_R1_001	70_S7_L001_R1_001	0	NOVEL	COVERED	0.58293	0.58293	1	1	0.999992	65	0	4.79499	7.76667	8.26694	0	0.153846	0.02	-0.227773
ACR_2	chr5	38203337	38203337	T	A	intronic	Zbtb49	NA	NA	NA	intronic	Zbtb49	NA	NA	NA	UTR3	ENSMUSG00000029127	ENSMUST00000146859:c.*10A>T	NA	NA	5qB3	NA	NA	-	TCAGGATCAGTTCCTGATGCC	chr5	38203337	CAGxTCC	T	A	68_S5_L001_R1_001	70_S7_L001_R1_001	0	NOVEL	COVERED	0.522161	0.522161	1	1	0.999992	63	0	4.89172	7.41784	7.97114	0	0.166667	0.02	-0.210309
ACR_2	chr5	76876009	76876009	A	G	UTR3	Aasdh	NM_173765:c.*15T>C	NA	NA	UTR3	Aasdh	uc008xvi.2:c.*15T>C,uc012dxp.1:c.*15T>C	NA	NA	UTR3	ENSMUSG00000055923	ENSMUST00000120963:c.*15T>C,ENSMUST00000126741:c.*1930T>C,ENSMUST00000069709:c.*15T>C	NA	NA	5qC3.3	NA	NA	-	CCTCTCACTGACATACTTACA	chr5	76876009	CTGxCAT	A	G	68_S5_L001_R1_001	64_Jiri_S1_L001_R1_001	0	NOVEL	COVERED	1	1	1	1	1	535	0	-43.28	25.651	11.7983	16.5129	0.054545	0.02	6.39182
ACR_2	chr5	115619650	115619650	A	T	splicing	Gcn1l1	NM_172719:exon55:c.7415-2A>T	NA	NA	splicing	Gcn1l1	uc008zeg.1:exon55:c.7415-2A>T,uc012ecf.1:exon19:c.2564-2A>T	NA	NA	splicing	ENSMUSG00000041638	ENSMUST00000064454:exon55:c.7415-2A>T,ENSMUST00000094427:exon19:c.2564-2A>T	NA	NA	5qF	NA	NA	+	GCCTCTGCTCAGCTGACGTAT	chr5	115619650	CTCxGCT	A	T	68_S5_L001_R1_001	64_Jiri_S1_L001_R1_001	0	NOVEL	COVERED	0.260399	0.260965	0.997832	0.997832	0	32	0	5.43175	6.47733	6.98406	0	0.214286	0.02	-0.139978
ACR_2	chr5	124090023	124090023	C	G	exonic	Abcb9	NA	nonsynonymous SNV	Abcb9:NM_019875:exon2:c.G154C:p.A52P	exonic	Abcb9	NA	nonsynonymous SNV	Abcb9:uc008zou.1:exon2:c.G154C:p.A52P,Abcb9:uc008zow.1:exon2:c.G154C:p.A52P	exonic	ENSMUSG00000029408	NA	nonsynonymous SNV	ENSMUSG00000029408:ENSMUST00000126856:exon1:c.G154C:p.A52P,ENSMUSG00000029408:ENSMUST00000141510:exon1:c.G154C:p.A52P,ENSMUSG00000029408:ENSMUST00000031354:exon2:c.G154C:p.A52P	5qF	NA	NA	-	AGGCAGGCAGCCCAGAGGTCC	chr5	124090023	CAGxCCA	C	G	68_S5_L001_R1_001	64_Jiri_S1_L001_R1_001	0	NOVEL	COVERED	0.387354	0.387407	0.999863	0.999863	0.983538	40	0	6.28738	7.76527	8.52279	1.62469	0.210526	0.02	-0.175315
ACR_2	chr5	137106029	137106029	A	T	intergenic	Serpine1,Trim56	dist=33757;dist=5257	NA	NA	intergenic	Serpine1,Trim56	dist=33757;dist=5257	NA	NA	UTR3	ENSMUSG00000043279	ENSMUST00000054384:c.*6427T>A	NA	NA	5qG2	NA	NA	NA	CACTGGGAAGAGAGCGCGCTC	chr5	137106029	AAGxGAG	A	T	68_S5_L001_R1_001	E210_S1	0	NOVEL	COVERED	0.999968	0.999968	1	1	0.999994	144	0	-5.33324	12.3775	5.76035	6.39987	0.080808	0.02	1.92188
ACR_2	chr5	137758472	137758472	A	C	intronic	Tsc22d4	NA	NA	NA	intronic	Tsc22d4	NA	NA	NA	exonic	ENSMUSG00000029723	NA	nonsynonymous SNV	ENSMUSG00000029723:ENSMUST00000110985:exon1:c.A161C:p.H54P	5qG2	NA	NA	+	CCTCCTGCCCACCAGGGCCTG	chr5	137758472	CCCxCCA	A	C	68_S5_L001_R1_001	64_Jiri_S1_L001_R1_001	0	NOVEL	COVERED	0.990874	0.990964	0.999909	0.999909	0.989678	86	0	-2.44587	8.38874	0	9.86835	0.081967	0.02	0.956953
ACR_2	chr5	137957942	137957942	T	C	exonic	Gjc3	NA	nonsynonymous SNV	Gjc3:NM_080450:exon2:c.A80G:p.H27R	exonic	Gjc3	NA	nonsynonymous SNV	Gjc3:uc009aeg.1:exon2:c.A80G:p.H27R	exonic	ENSMUSG00000056966	NA	nonsynonymous SNV	ENSMUSG00000056966:ENSMUST00000077119:exon2:c.A80G:p.H27R	5qG2	NA	NA	-	AGGGGTGGAGTGCTGGCTCTC	chr5	137957942	GAGxGCT	T	C	68_S5_L001_R1_001	64_Jiri_S1_L001_R1_001	0	NOVEL	COVERED	0.457694	0.457757	0.999863	0.999863	0.983538	42	0	21.9033	21.9033	4.84967	21.0083	0.5	0.02	-0.192662
ACR_2	chr6	23000574	23000574	G	A	exonic	Ptprz1	NA	nonsynonymous SNV	Ptprz1:NM_001081306:exon12:c.G2662A:p.A888T	exonic	Ptprz1	NA	nonsynonymous SNV	Ptprz1:uc009bba.1:exon12:c.G2662A:p.A888T,Ptprz1:uc009bbb.1:exon12:c.G2662A:p.A888T	exonic	ENSMUSG00000068748	NA	nonsynonymous SNV	ENSMUSG00000068748:ENSMUST00000090568:exon12:c.G2662A:p.A888T	6qA3.1	NA	NA	+	TTCTGATGTGGCGTCACATCA	chr6	23000574	GTGxCGT	G	A	68_S5_L001_R1_001	E210_S1	0	NOVEL	COVERED	0.976246	0.976865	0.999366	0.999366	0	72	0	-0.854926	8.16518	3.58367	6.35902	0.092593	0.02	1.01923
ACR_2	chr6	24092213	24092213	A	C	intronic	Slc13a1	NA	NA	NA	intronic	Slc13a1	NA	NA	NA	intronic	ENSMUSG00000029700	NA	NA	NA	6qA3.1	NA	NA	-	AAATAATGTAAATCTAATACT	chr6	24092213	GTAxATC	A	C	68_S5_L001_R1_001	64_Jiri_S1_L001_R1_001	0	NOVEL	COVERED	0.999978	0.999978	1	1	1	188	0	58.1626	62.5634	44.9044	33.9363	0.281553	0.02	2.29233
ACR_2	chr6	38050607	38050607	A	T	exonic	Atp6v0a4	NA	nonsynonymous SNV	Atp6v0a4:NM_080467:exon20:c.T2267A:p.M756K	exonic	Atp6v0a4	NA	nonsynonymous SNV	Atp6v0a4:uc009bjp.2:exon20:c.T2267A:p.M756K,Atp6v0a4:uc009bjo.2:exon21:c.T2267A:p.M756K	exonic	ENSMUSG00000038600	NA	nonsynonymous SNV	ENSMUSG00000038600:ENSMUST00000040259:exon20:c.T2267A:p.M756K,ENSMUSG00000038600:ENSMUST00000114908:exon21:c.T2267A:p.M756K	6qB1	NA	NA	-	GCCGATGCTCATGACCATGGT	chr6	38050607	CTCxTGA	A	T	68_S5_L001_R1_001	70_S7_L001_R1_001	0	NOVEL	COVERED	0.918171	0.918171	1	1	0.999992	84	0	-0.713257	6.44216	0	6.71441	0.093023	0.02	-0.38542
ACR_2	chr6	48024425	48024425	A	C	UTR3	Zfp777	NM_001081382:c.*204T>G	NA	NA	UTR3	Zfp777	uc009btt.1:c.*204T>G,uc009btu.1:c.*204T>G	NA	NA	UTR3	ENSMUSG00000071477	ENSMUST00000114583:c.*204T>G,ENSMUST00000095944:c.*204T>G	NA	NA	6qB2.3	NA	NA	-	GCCCTGGGGAAGCAGGCAAGA	chr6	48024425	GGAxGCA	A	C	68_S5_L001_R1_001	64_Jiri_S1_L001_R1_001	0	NOVEL	COVERED	1	1	1	1	1	382	0	49.3786	64.0426	17.5932	49.4154	0.222772	0.02	3.71728
ACR_2	chr6	54643570	54643570	A	T	UTR3	Plekha8	NM_001164361:c.*2589A>T,NM_001001335:c.*2589A>T	NA	NA	UTR3	Plekha8	uc009cab.2:c.*2589A>T,uc009cac.2:c.*2589A>T	NA	NA	UTR3	ENSMUSG00000005225	ENSMUST00000119706:c.*2589A>T	NA	NA	6qB3	NA	NA	+	GGCAGAGCTGACAGCTCTTGA	chr6	54643570	CTGxCAG	A	T	68_S5_L001_R1_001	E210_S1	0	NOVEL	COVERED	0.948269	0.948402	0.99986	0.99986	0.982485	67	0	-2.02436	6.44198	2.87268	3.44891	0.083333	0.02	-0.420723
ACR_2	chr6	96115768	96115768	C	G	intronic	Fam19a1	NA	NA	NA	intronic	Fam19a1	NA	NA	NA	intronic	ENSMUSG00000059187	NA	NA	NA	6qD3	NA	NA	+	AGTGGGGGAGCAGCCTCCCCG	chr6	96115768	GAGxAGC	C	G	68_S5_L001_R1_001	64_Jiri_S1_L001_R1_001	0	NOVEL	COVERED	0.260931	0.260965	0.999869	0.999869	0.984784	37	0	7.89551	8.80292	0	8.80292	0.25	0.02	-0.14024
ACR_2	chr6	128780281	128780281	G	A	UTR3	Klrb1c	NM_001159904:c.*4C>T,NM_008527:c.*4C>T	NA	NA	UTR3	Klrb1c	uc009een.2:c.*4C>T,uc009eep.2:c.*4C>T,uc009eeo.2:c.*4C>T,uc009eeq.2:c.*4C>T	NA	NA	UTR3	ENSMUSG00000030325	ENSMUST00000167691:c.*4C>T,ENSMUST00000174404:c.*4C>T,ENSMUST00000172601:c.*4C>T	NA	NA	6qF3	NA	NA	-	GATGGGATTCGCAGTCAGGAG	chr6	128780281	TTCxCAG	G	A	68_S5_L001_R1_001	64_Jiri_S1_L001_R1_001	0	NOVEL	COVERED	0.888875	0.888875	1	1	0.999995	98	12	9.34615	9.22809	9.1278	9.22809	1	0.02	-0.358897
ACR_2	chr6	128780308	128780308	C	T	exonic	Klrb1c	NA	nonsynonymous SNV	Klrb1c:NM_001159904:exon6:c.G793A:p.E265K,Klrb1c:NM_008527:exon6:c.G784A:p.E262K	exonic	Klrb1c	NA	nonsynonymous SNV	Klrb1c:uc009een.2:exon6:c.G784A:p.E262K,Klrb1c:uc009eeo.2:exon6:c.G775A:p.E259K,Klrb1c:uc009eep.2:exon6:c.G793A:p.E265K,Klrb1c:uc009eeq.2:exon6:c.G649A:p.E217K	exonic	ENSMUSG00000030325	NA	nonsynonymous SNV	ENSMUSG00000030325:ENSMUST00000167691:exon6:c.G784A:p.E262K,ENSMUSG00000030325:ENSMUST00000174404:exon6:c.G793A:p.E265K	6qF3	NA	NA	-	CTCGGGGTTTCATGGTTTAGT	chr6	128780308	TTTxATG	C	T	68_S5_L001_R1_001	64_Jiri_S1_L001_R1_001	0	NOVEL	COVERED	0.888875	0.888875	1	1	0.999992	93	12	9.34615	9.22809	8.82643	9.22809	1	0.02	-0.359144
ACR_2	chr6	129270054	129270054	A	T	exonic	Cd69	NA	nonsynonymous SNV	Cd69:NM_001033122:exon3:c.T322A:p.L108M	exonic	Cd69	NA	nonsynonymous SNV	Cd69:uc009efi.1:exon3:c.T322A:p.L108M	exonic	ENSMUSG00000030156	NA	nonsynonymous SNV	ENSMUSG00000030156:ENSMUST00000032259:exon3:c.T322A:p.L108M	6qF3	NA	NA	-	CGTTGGGCCAAGGCCCAACTC	chr6	129270054	CCAxGGC	A	T	68_S5_L001_R1_001	64_Jiri_S1_L001_R1_001	0	NOVEL	COVERED	0.999407	0.999407	1	1	1	136	0	-9.37994	7.1331	5.86832	2.79494	0.060976	0.02	0.781051
ACR_2	chr6	136964486	136964486	A	T	intergenic	Pde6h,Rerg	dist=1003;dist=90339	NA	NA	intergenic	Pde6h,Rerg	dist=1003;dist=90339	NA	NA	UTR3	ENSMUSG00000064330	ENSMUST00000137768:c.*1217A>T	NA	NA	6qG1	NA	NA	NA	ACTCAGTCTTAAAGACTGAAA	chr6	136964486	CTTxAAG	A	T	68_S5_L001_R1_001	64_Jiri_S1_L001_R1_001	0	NOVEL	COVERED	0.999998	0.999998	1	1	1	205	0	-16.7539	8.12569	3.71928	4.19383	0.051282	0.02	1.78239
ACR_2	chr6	146642501	146642501	T	G	upstream	Med21	NA	NA	NA	upstream	Med21	NA	NA	NA	upstream	ENSMUSG00000030291	NA	NA	NA	6qG3	NA	NA	+	GCATGCTTCCTTAACCACGCC	chr6	146642501	TCCxTAA	T	G	68_S5_L001_R1_001	64_Jiri_S1_L001_R1_001	0	NOVEL	COVERED	0.760795	0.760887	0.999879	0.999879	0.986224	55	0	7.04179	9.75979	9.16981	7.50228	0.193548	0.02	-0.280187
ACR_2	chr7	4009303	4009303	A	G	UTR3	Lair1	NM_001302675:c.*388T>C,NM_001113474:c.*388T>C,NM_178611:c.*388T>C,NM_001302676:c.*388T>C,NM_001302677:c.*388T>C,NM_001302681:c.*388T>C,NM_001302682:c.*422T>C,NM_001302683:c.*388T>C	NA	NA	UTR3	Lair1	uc009ewt.2:c.*388T>C,uc009ews.2:c.*388T>C,uc009ewu.2:c.*388T>C,uc012ewk.1:c.*388T>C,uc012ewl.1:c.*388T>C,uc012ewm.1:c.*422T>C,uc012ewn.1:c.*388T>C	NA	NA	UTR3	ENSMUSG00000055541	ENSMUST00000068865:c.*388T>C,ENSMUST00000086400:c.*388T>C,ENSMUST00000086401:c.*388T>C,ENSMUST00000136616:c.*1080T>C,ENSMUST00000149395:c.*800T>C	NA	NA	7qA1	NA	NA	-	GAAGGGACTCAGCCTTCAGCT	chr7	4009303	CTCxGCC	A	G	68_S5_L001_R1_001	64_Jiri_S1_L001_R1_001	0	NOVEL	COVERED	0.835714	0.835716	0.999998	0.999998	0.999763	71	0	27.2192	27.6147	14.3271	13.2164	0.388889	0.02	-0.323977
ACR_2	chr7	5008535	5008535	T	C	exonic	Fiz1	NA	nonsynonymous SNV	Fiz1:NM_001110328:exon3:c.A983G:p.E328G,Fiz1:NM_001110329:exon3:c.A983G:p.E328G,Fiz1:NM_001110330:exon3:c.A983G:p.E328G,Fiz1:NM_011813:exon3:c.A983G:p.E328G	exonic	Fiz1	NA	nonsynonymous SNV	Fiz1:uc009eze.2:exon3:c.A983G:p.E328G,Fiz1:uc009ezf.2:exon3:c.A983G:p.E328G,Fiz1:uc009ezg.2:exon3:c.A983G:p.E328G,Fiz1:uc009ezh.2:exon3:c.A983G:p.E328G,Fiz1:uc012exb.1:exon3:c.A983G:p.E328G	exonic	ENSMUSG00000061374	NA	nonsynonymous SNV	ENSMUSG00000061374:ENSMUST00000077385:exon3:c.A983G:p.E328G,ENSMUSG00000061374:ENSMUST00000165320:exon3:c.A983G:p.E328G,ENSMUSG00000061374:ENSMUST00000167804:exon3:c.A983G:p.E328G	7qA1	NA	NA	-	CGAAGATGCTTCGGCTGCTGC	chr7	5008535	GCTxCGG	T	C	68_S5_L001_R1_001	64_Jiri_S1_L001_R1_001	0	NOVEL	COVERED	0.387356	0.387407	0.999869	0.999869	0.984784	41	0	4.87348	6.37442	0.36397	5.98469	0.210526	0.02	-0.174955
ACR_2	chr7	26557547	26557547	G	A	exonic	Nlrp9a	NA	nonsynonymous SNV	Nlrp9a:NM_001048219:exon3:c.G589A:p.E197K,Nlrp9a:NM_001048220:exon3:c.G589A:p.E197K	exonic	Nlrp9a	NA	nonsynonymous SNV	Nlrp9a:uc012fgd.1:exon2:c.G322A:p.E108K,Nlrp9a:uc012fge.1:exon2:c.G589A:p.E197K,Nlrp9a:uc009fuo.1:exon3:c.G589A:p.E197K,Nlrp9a:uc009fup.1:exon3:c.G589A:p.E197K	exonic	ENSMUSG00000054102	NA	nonsynonymous SNV	ENSMUSG00000054102:ENSMUST00000117252:exon2:c.G589A:p.E197K,ENSMUSG00000054102:ENSMUST00000122040:exon2:c.G589A:p.E197K,ENSMUSG00000054102:ENSMUST00000153452:exon2:c.G322A:p.E108K,ENSMUSG00000054102:ENSMUST00000071780:exon3:c.G589A:p.E197K,ENSMUSG00000054102:ENSMUST00000108387:exon3:c.G589A:p.E197K	7qA3	NA	NA	+	AAGCTTAGCTGAGCTTATCTC	chr7	26557547	GCTxAGC	G	A	68_S5_L001_R1_001	70_S7_L001_R1_001	0	NOVEL	COVERED	0.999987	0.999987	1	1	1	237	0	-13.1163	8.50596	6.26861	2.24538	0.057143	0.02	1.87736
ACR_2	chr7	28152767	28152767	A	G	exonic	9530053A07Rik	NA	synonymous SNV	9530053A07Rik:NM_001164655:exon11:c.A3714G:p.K1238K	exonic	9530053A07Rik	NA	synonymous SNV	9530053A07Rik:uc009fxx.2:exon11:c.A3714G:p.K1238K	exonic	ENSMUSG00000078776	NA	synonymous SNV	ENSMUSG00000078776:ENSMUST00000150948:exon10:c.A3714G:p.K1238K,ENSMUSG00000078776:ENSMUST00000059886:exon11:c.A3714G:p.K1238K	7qA3	NA	NA	+	GCACAGAGAAAGATGGCAAGG	chr7	28152767	GAAxGAT	A	G	68_S5_L001_R1_001	64_Jiri_S1_L001_R1_001	0	NOVEL	COVERED	0.739671	0.739671	1	1	1	89	0	22.1496	23.0107	18.5143	8.99272	0.322581	0.02	-0.280352
ACR_2	chr7	29529233	29529233	A	T	intergenic	Sipa1l3,Catsperg2	dist=23773;dist=167986	NA	NA	intergenic	Sipa1l3,4930432E11Rik	dist=10673;dist=31282	NA	NA	exonic	ENSMUSG00000074224	NA	synonymous SNV	ENSMUSG00000074224:ENSMUST00000141713:exon4:c.A1293T:p.S431S	7qB1	NA	NA	NA	CAGGCACCTCAGAGGTGCTAG	chr7	29529233	CTCxGAG	A	T	68_S5_L001_R1_001	E210_S1	0	NOVEL	COVERED	0.78095	0.78106	0.99986	0.99986	0.982485	53	0	2.18388	7.06813	4.09074	3.11026	0.117647	0.02	-0.298015
ACR_2	chr7	43794230	43794230	T	C	intronic	Klk9	NA	NA	NA	ncRNA_intronic	2310002F09Rik	NA	NA	NA	ncRNA_intronic	ENSMUSG00000097178	NA	NA	NA	7qB3	NA	NA	+	GAGCTCCCCGTCCCCAGCCTG	chr7	43794230	CCGxCCC	T	C	68_S5_L001_R1_001	64_Jiri_S1_L001_R1_001	0	NOVEL	UNCOVERED	0.05413	0.054137	0.999869	0.999869	0.984784	29	0	6.72326	6.83277	6.44353	3.27643	0.375	0.02	-0.070108
ACR_2	chr7	44529990	44529990	G	A	intronic	Spib	NA	NA	NA	intronic	Spib	NA	NA	NA	intronic	ENSMUSG00000008193	NA	NA	NA	7qB3	NA	NA	-	CTACCTTGGGGAAGACTGACA	chr7	44529990	GGGxAAG	G	A	68_S5_L001_R1_001	64_Jiri_S1_L001_R1_001	0	NOVEL	COVERED	0.888875	0.888875	1	1	0.999912	78	0	7.80652	12.0221	4.32664	9.44304	0.170732	0.02	-0.359031
ACR_2	chr7	45883184	45883184	A	T	UTR3	Kdelr1	NM_133950:c.*173A>T	NA	NA	UTR3	Kdelr1	uc009gxn.1:c.*173A>T,uc009gxo.1:c.*202A>T	NA	NA	UTR3	ENSMUSG00000002778	ENSMUST00000002855:c.*173A>T,ENSMUST00000107719:c.*202A>T,ENSMUST00000107718:c.*173A>T	NA	NA	7qB3	NA	NA	+	GGAGCTCAGGACCTGAGCTGT	chr7	45883184	AGGxCCT	A	T	68_S5_L001_R1_001	64_Jiri_S1_L001_R1_001	0	NOVEL	COVERED	0.999991	0.999991	1	1	1	236	0	-8.53504	11.0814	7.45504	7.29983	0.075472	0.02	2.06292
ACR_2	chr7	66080324	66080324	C	T	intronic	Vimp	NA	NA	NA	intronic	Vimp	NA	NA	NA	intronic	ENSMUSG00000075701	NA	NA	NA	7qC	NA	NA	+	TTTTTTTTTTCCCCCCAGTGG	chr7	66080324	TTTxCCC	C	T	68_S5_L001_R1_001	E210_S1	0	NOVEL	COVERED	0.423476	0.423478	0.999997	0.999997	0.99963	50	0	5.21434	6.67482	2.59458	3.83325	0.210526	0.02	-0.18286
ACR_2	chr7	81495551	81495551	C	T	intronic	BC048679	NA	NA	NA	intronic	BC048679	NA	NA	NA	intronic	ENSMUSG00000061877	NA	NA	NA	7qD3	NA	NA	-	ACAGCTTGCTCACGAGTGGCC	chr7	81495551	GCTxACG	C	T	68_S5_L001_R1_001	64_Jiri_S1_L001_R1_001	0	NOVEL	COVERED	0.948402	0.948402	1	1	0.999974	86	0	14.7026	18.5181	5.30956	15.2042	0.208333	0.02	-0.420596
ACR_2	chr7	126851380	126851380	G	C	exonic	Doc2a	NA	nonsynonymous SNV	Doc2a:NM_010069:exon8:c.G827C:p.G276A	exonic	Doc2a	NA	nonsynonymous SNV	Doc2a:uc009jtb.1:exon8:c.G827C:p.G276A	exonic	ENSMUSG00000052301	NA	nonsynonymous SNV	ENSMUSG00000052301:ENSMUST00000064110:exon8:c.G827C:p.G276A	7qF3	NA	NA	+	CTGCTGGTGGGCATTGTTCGC	chr7	126851380	TGGxCAT	G	C	68_S5_L001_R1_001	64_Jiri_S1_L001_R1_001	0	NOVEL	COVERED	0.353932	0.353947	0.999957	0.999957	0.993897	45	0	22.5726	22.5726	14.9484	16.2718	0.5	0.02	-0.166566
ACR_2	chr7	127335011	127335011	A	G	UTR3	Itgal	NM_008400:c.*1401A>G,NM_001253873:c.*1401A>G,NM_001253874:c.*1401A>G,NM_001253872:c.*1401A>G	NA	NA	UTR3	Itgal	uc009jva.2:c.*1401A>G,uc009juz.2:c.*1401A>G,uc009jvb.2:c.*1401A>G,uc012fuc.2:c.*1401A>G	NA	NA	UTR3	ENSMUSG00000030830	ENSMUST00000117762:c.*1401A>G,ENSMUST00000106306:c.*1401A>G,ENSMUST00000118405:c.*1401A>G	NA	NA	7qF3	NA	NA	+	AAATGAATATATTTCCTCAAA	chr7	127335011	TATxTTT	A	G	68_S5_L001_R1_001	64_Jiri_S1_L001_R1_001	0	NOVEL	COVERED	0.990964	0.990964	1	1	1	141	0	50.0222	50.6748	36.9067	23.4302	0.385965	0.02	1.05425
ACR_2	chr7	130729280	130729280	G	T	exonic	Tacc2	NA	synonymous SNV	Tacc2:NM_021314:exon3:c.G963T:p.A321A,Tacc2:NM_206856:exon6:c.G1293T:p.A431A,Tacc2:NM_001004468:exon7:c.G6414T:p.A2138A	exonic	Tacc2	NA	synonymous SNV	Tacc2:uc009kak.1:exon3:c.G963T:p.A321A,Tacc2:uc009kal.1:exon3:c.G963T:p.A321A,Tacc2:uc009kam.1:exon3:c.G963T:p.A321A,Tacc2:uc009kaf.1:exon6:c.G1293T:p.A431A,Tacc2:uc009kae.1:exon7:c.G6414T:p.A2138A	exonic	ENSMUSG00000030852	NA	synonymous SNV	ENSMUSG00000030852:ENSMUST00000033141:exon3:c.G963T:p.A321A,ENSMUSG00000030852:ENSMUST00000059145:exon6:c.G1293T:p.A431A,ENSMUSG00000030852:ENSMUST00000084513:exon7:c.G6414T:p.A2138A	7qF3	NA	NA	+	CCTCTGAGGCGGTGGAGGTGA	chr7	130729280	GGCxGTG	G	T	68_S5_L001_R1_001	64_Jiri_S1_L001_R1_001	0	NOVEL	COVERED	0.999678	0.999678	1	1	1	160	0	-6.24838	9.50874	10.2019	2.85399	0.071429	0.02	0.750667
ACR_2	chr7	141637923	141637923	G	A	exonic	Muc6	NA	unknown	UNKNOWN	exonic	Muc6	NA	nonsynonymous SNV	Muc6:uc009klu.2:exon32:c.C6245T:p.T2082I	exonic	ENSMUSG00000048191	NA	nonsynonymous SNV	ENSMUSG00000048191:ENSMUST00000062451:exon32:c.C6641T:p.T2214I	7qF5	NA	NA	-	GGTTGTATATGTGACAGGTAC	chr7	141637923	TATxTGA	G	A	68_S5_L001_R1_001	70_S7_L001_R1_001	0	NOVEL	COVERED	0.997163	0.997163	1	1	1	154	4	-5.56095	7.68256	6.86448	1.07039	0.071429	0.02	0.877694
ACR_2	chr8	14896612	14896612	T	C	exonic	Cln8	NA	nonsynonymous SNV	Cln8:NM_012000:exon3:c.T625C:p.Y209H	exonic	Cln8	NA	nonsynonymous SNV	Cln8:uc009kze.1:exon3:c.T625C:p.Y209H	exonic	ENSMUSG00000026317	NA	nonsynonymous SNV	ENSMUSG00000026317:ENSMUST00000027554:exon3:c.T625C:p.Y209H	8qA1.1	NA	NA	+	GATCCTCACCTACCACATGTG	chr8	14896612	ACCxACC	T	C	68_S5_L001_R1_001	64_Jiri_S1_L001_R1_001	0	NOVEL	COVERED	0.926637	0.92664	0.999997	0.999997	0.999646	75	0	-1.10945	6.55947	0	7.43008	0.088889	0.02	-0.394158
ACR_2	chr8	15895740	15895740	T	A	exonic	Csmd1	NA	nonsynonymous SNV	Csmd1:NM_053171:exon70:c.A10672T:p.N3558Y	exonic	Csmd1	NA	nonsynonymous SNV	Csmd1:uc009kzo.1:exon21:c.A2158T:p.N720Y,Csmd1:uc009kzp.1:exon70:c.A10672T:p.N3558Y	exonic	ENSMUSG00000060924	NA	nonsynonymous SNV	ENSMUSG00000060924:ENSMUST00000082104:exon70:c.A10672T:p.N3558Y	8qA1.1	NA	NA	-	CACACTGTGTTCAGAGTCGTG	chr8	15895740	TGTxCAG	T	A	68_S5_L001_R1_001	70_S7_L001_R1_001	0	NOVEL	COVERED	0.954491	0.954491	1	1	0.999994	92	0	-1.70996	6.481	7.08201	1.37793	0.085106	0.02	-0.429205
ACR_2	chr8	84707285	84707285	T	C	UTR3	Nfix	NM_010906:c.*1413A>G,NM_001081982:c.*1413A>G,NM_001081981:c.*1378A>G,NM_001297601:c.*1413A>G	NA	NA	UTR3	Nfix	uc009mnc.2:c.*1378A>G,uc009mnd.2:c.*1413A>G,uc009mne.2:c.*1413A>G,uc009mnf.2:c.*1413A>G	NA	NA	UTR3	ENSMUSG00000001911	ENSMUST00000109764:c.*1378A>G	NA	NA	8qC2	NA	NA	-	AGGGGCCCAGTCACCCTGCAG	chr8	84707285	CAGxCAC	T	C	68_S5_L001_R1_001	64_Jiri_S1_L001_R1_001	0	NOVEL	COVERED	0.981955	0.981955	0.999999	0.999999	0.999855	93	0	-0.914492	7.8167	0	8.83507	0.09434	0.02	1.01893
[truncated: 3,659 more rows]
[truncated: 30 more columns]

## Sheet: S3
Samples	Chr	Start	End	Ref	Alt	Func.refGene	Gene.refGene	GeneDetail.refGene	ExonicFunc.refGene	AAChange.refGene	Func.knownGene	Gene.knownGene	GeneDetail.knownGene	ExonicFunc.knownGene	AAChange.knownGene	Func.ensGene	Gene.ensGene	GeneDetail.ensGene	ExonicFunc.ensGene	AAChange.ensGene	cytoBand	genomicSuperDups	snp142	Strand	context	trinucleotide_context	CHROM	POS	ID	REF	ALT	QUAL	FILTER	INFO	FORMAT	NORMAL	TUMOR	X1.vcf.sorted_NORMAL	X1.vcf.sorted_TUMOR
[truncated: 414 more rows]

[truncated: 28 more sheets: S4, S5, S6, S7, S8, S9, S10, S11_Lung.AdenoCA, S11_Lung.SCC, S11_Liver.HCC, S11_Biliary.AdenoCA, S11_Panc.AdenoCA, S11_Kidney.ChRCC, S11_Kidney.ccRCC, S11_Kidney.papillary.RCC, S11_Eso.AdenoCA, S11_Stomach.AdenoCA, S11_ColoRect.AdenoCA, S11_Ovary.AdenoCA, S11_Cervix.AdenoCA …]
